# Supplementary material for: A dynamic interplay of nucleosome and Msn2 binding regulates kinetics of gene activation and repression following stress
Source: Oxford University Press journal article supplement (doi:10.1093/nar/gku176), 2014-03-05
Supplement: gku176_Supplementary_Data.zip [file gku176_Supplementary_Data.zip]

Archive with 5 entries (5 files):
- nar-00096-v-2014-File011.xlsx
- nar-00096-v-2014-File010.pdf
- nar-00096-v-2014-File013.mov
- nar-00096-v-2014-File014.mov
- nar-00096-v-2014-File012.xlsx
