# Supplementary material for: A dynamic interplay of nucleosome and Msn2 binding regulates kinetics of gene activation and repression following stress
Source: Oxford University Press journal article supplement (doi:10.1093/nar/gku176), 2014-03-05
Supplement: gku176_Supplementary_Data.zip [file gku176_Supplementary_Data.zip › nar-00096-v-2014-File011.xlsx]

## Sheet: Sheet1
Table S1. Msn2 Binding Peaks as Determined by ChIP Seq After a Glucose Downshift
Column A: Chromosome
Column B: Position (bp) of the binding peak from the left end of the indicated chromosome
Column C: Systematic Name of the Gene Associated with the Peak
Column D: Common name of the gene in column C
Column E: Characteristic of the gene either with regard to the response to Msn2 (induced (I), repressed ( R ), neutral (N)) or its structural feature (transposon (Ty) or coding region (CR))
Column F: Number of STREs within the promoter of the associated gene
Columns G-H: Extent of Msn2 binding at time 0 (column G) and 20 min post downshift (column H) as determined by integrating normalized Chip-Seq reads in the 250 bp surrounding the Msn2 peak
Columns I-J: Extent of Rpb1 binding at time 0 (column G) and 20 min post downshift (column H) as determined by integrating normalized Chip-Seq reads over the coding region of the indicated gene
Columns K-N: Transcript level changes (log2 fold change relative to time 0) of the indicated genes at 20 and 60 min following glucose downshift of an MSN2 MSN4 (MSN) and an msn2 msn4 strain
Columns 0-Q: Transcript level changes (log2 fold change relative to time 0) 60 min after estradiol treatment of Z4EV driving WT MSN2 (column O), MSN2(6A) (column P) or a control strain (column Q)
						Integrated Msn2 peak		Integrated Rpb1 over ORFs		Transcript Fold Change (log2) After Glucose Downshit				Transcript Fold Change (log2) After Estradiol Addition to Z4EV Strains
Chr	Position	Gene	Name	Response	# STREs	0 min	20 min	0 min	20 min	MSN 20	MSN 60	msn 20	msn 60	Z4EV WT 60	Z4EV 6A 60	control
1	32600	YAL061W	BDH2	I	2	361.872	795.061	2894.63	15945.5	4.27	5.52	0.19	1.55	3.3109	5.24873	0.000765849
1	34600	YAL060W	BDH1	I	1	711.108	1339.15	2147.1	4935.2	1.62	3.27	0.37	1.21	1.07472	1.12698	0.331476
1	68900	YAL039C	CYC3	CR	2	464.69	1319.7	2059.27	2340.16	0.33	0.68	0.2	0.56	-0.0956673	-0.0669509	0.113873
1	71300	YAL038W	CDC19	R	3	355.937	909.876	30590.9	10863.1	0.46	-0.31	0.12	-0.11	0	0	0.622844
1	129700	YAL013W	DEP1	CR	0	646.009	1710.88	3945.82	3218.24	0.1	0.52	0.28	0.48	0.547337	0.209249	0.144703
1	141700	YAL005C	SSA1	N	2	307.113	1470.17	24360	46263.3	2.51	2.46	2.51	1.28	1.26406	2.4488	0.125659
1	165600	Ty		Ty	0
1	190500	YAR035W	YAT1	CR	2	770.654	1611.19	2295.37	2418.08	0.48	4.02	0.31	2.25	0.0790464	-0.383315	-0.0811642
2	111700	YBL058W	SHP1	CR	1	583.308	1064.91	2269.65	3848.65	-0.07	0.46	-0.5	-0.07	0.551968	0.14622	0.359399
2	136300	YBL044W		N	2	313.381	1369.47	300.616	430.961	0.44	1	0.46	0.55	0.643701	0.63204	-0.0619608
2	165300	YBL029C-A		I	4	949.856	2215.05	193.818	353.668	1.65	2.08	0.91	1.34	0.446444	1.27756	-0.195053
2	182100	YBL021C	HAP3	N	0	746.644	1218.24	774.877	539.273	-0.4	-0.15	0.22	0.3	0.308557	0.3334	0.121231
2	193900	YBL015W	ACH1	I	4	629.574	1643.65	1997.51	7092.42	2.41	3.97	0.62	1.68	1.23487	1.97578	-0.0160951
2	221600	Ty		Ty	0
2	260300	Ty		Ty	0
2	373300	YBR067C	TIP1	N	1	353.512	2103.63	6997.23	9196.12	0.56	0.73	0.48	0.17	0.0748165	-0.0423119	0.485842
2	381500	YBR072W	HSP26	I	4	935.542	3062.72	1892.69	18102.7	5.54	6.45	1.03	1.94	2.38606	2.59232	-0.61683
2	392700	YBR078W	ECM33	N	0	598.134	1387.99	9930.22	2860.61	-0.65	-2.33	-0.52	-2.19	0.0529977	-0.28872	-0.0243823
2	396600	YBR079C	RPG1	CR	0	462.148	1105.78	5266.71	2591.36	-0.22	-1.56	-0.23	-1.57	-0.488611	-1.19448	-0.00862264
2	405900	YBR081C	SPT7	N	2	887.743	1700.58	2004.63	1947.08	-0.13	-0.31	-0.01	-0.16	-0.344428	-0.347258	-0.158584
2	408700	YBR083W	TEC1	N	1	992.799	2896.82	2844.78	1427.64	0.14	0.06	0.28	-0.22	-0.619791	-1.22132	-0.093424
2	419700	YBR085C-A		I	5	736.931	2047.4	499.181	4009.34	1.11	1.33	0.95	0.77	1.03551	1.99279	-0.199188
2	466500	YBR114W	RAD16	I	3	697.311	1532.23	2683.39	1675.54	0.56	0.92	-0.23	0.1	0.055676	1.66405	-0.0973132
2	478500	YBR118W	TEF2	CR	0	1719.76	2699.48	43870.5	32994.1	0.02	-1.53	-0.42	-2
2	490800	YBR126C	TPS1	I	5	821.539	2706.47	8084.99	27486.9	2.42	2.98	0.26	0.75	2.99826	3.92265	0.163806
3	50900	YCL040W	GLK1	I	0	65.2505	839.454	11839.2	31888.6	3.49	4.7	2.95	4.92	3.96441	2.98007	0.552542
3	78400	YCL025C	AGP1	N	3	541.007	2077.47	7642.2	17999.7	1.3	1.45	2.19	1.54	-0.51006	-1.18345	-0.169872
3	85500	Ty		Ty	0
3	122800	YCR005C	CIT2	R	0	831.086	4333.35	5947.25	11033.1	2.34	2.24	3.29	2.13	0.185945	0.129108	0.433435
3	137300	YCR012W	PGK1	R	1	255.049	2872.77	27780.9	22372	0.69	0.49	0.87	0.9	0	0	0.756188
3	157700	YCR021C	HSP30	I	1	476.672	2377.45	1702.89	24681.5	3.23	3.89	1.78	2.09	2.90172	4.37574	-0.369518
4	62400	YDL222C	FMP45	I	0	812.991	1942.71	1520.46	15480.2	3.78	4.63	0.44	1.21	2.30226	4.41223	-0.248052
4	148000	YDL173W	PAR32	R	1	666.34	1369.96	1569	2187.24	0.27	0.11	1.18	0.91	0.107168	0.0447577	0.217727
4	239800	YDL125C	HNT1	I	2	284.842	1459.08	1911.19	3663.55	1.42	1.73	0.63	1.17	0.300112	1.16553	-0.164554
4	369000	YDL048C	STP4	I	8	715.822	3568.57	2246.11	8291.64	3.92	3.84	4.22	3.53	-1.01108	-0.598564	-0.577337
4	412600	YDL022W	GPD1	I	2	347.656	1065.23	7332.91	14257	3	2.4	2.55	1.51	2.36017	2.60357	0.52875
4	465300	YDR011W	SNQ2	N	1	266.639	1668.46	10965.6	19311.2	1.44	1.29	2.38	1.21	0.24865	0.0885328	0.378372
4	519100	Ty		Ty	0
4	529000	YDR038C	ENA5	CR	0	925.8	1892.25	5470.26	10969.4	-0.58	-1.11	-0.24	-0.55	0.232024	-0.164235	0.0670142
4	539300	YDR040C	ENA1	N	2	785.815	2062.64	5111.08	14608.6	2.74	2.82	3.58	3.44	-0.148842	-0.132814	-0.202161
4	591800	YDR073W	SNF11	N	0	751.716	2503.34	855.891	2950.47	0.74	1.23	0.85	0.84	-0.439409	-0.862097	-0.16569
4	593500	YDR074W	TPS2	I	6	503.28	1656.33	5154.36	31691.7	3.84	3.72	0.84	1.68	3.88077	4.47747	0.221922
4	601500	YDR077W	SED1	CR	2	995.792	1835.57	21185.3	26357.9	0.89	0.27	0.35	-0.2	0.940972	0.692899	0.318163
4	636300	YDR096W	GIS1	I	1	163.572	1612.1	1129.32	5133.65	2.36	2.78	0.82	1.27	1.00601	1.34865	0.227449
4	650700	Ty		Ty	0
4	722600	YDR134C		N	6	633.523	5269.47	1891.78	4115.13	0.46	-0.4	0.03	-0.78	0.0865324	-0.385667	-0.128959
4	758800	YDR150W	NUM1	CR	0	1488.05	1749.72	12730.4	10017.5	-0.45	-0.26	-0.72	-0.84	0.0212739	-0.149158	0.280875
4	768700	YDR155C	CPR1	CR	3	1089.12	1458.1	4999.44	9293.19	-0.06	-0.48	-0.38	-0.99	0.615729	1.09322	0.301386
4	806500	YDR171W	HSP42	I	3	1001.95	2788.74	5350.13	29998.5	5.39	5.45	5.28	4.7	4.63826	4.25818	0.669122
4	883600	Ty		Ty	0
4	894300	YDR216W	ADR1	I	0	853.5	6027.03	2176.94	10148.6	2.67	3.34	2.53	3.01	-0.251452	-0.399848	-0.355406
4	955300	YDR247W	VHS1	I	2	267.151	1727.44	893.912	4883.85	2.83	2.83	1.56	1.15	0.399326	0.938635	0.204732
4	976700	YDR259C	YAP6	N	2	165.111	1975.81	439.271	1251.35	0.1	0.83	0.1	0.66	-0.416199	0.242523	-0.0896301
4	992000	Ty		Ty	0
4	1014000	YDR276C	PMP3	I	4	201.517	1281.16	202.243	1175.65	0.67	0.78	-0.13	0.2	0.493334	0.708028	0.0738213
4	1080600	YDR309C	GIC2	N	1	333.811	1928.95	2793.38	546.153	-0.65	-1.27	-0.72	-1.05	0.0388131	-1.31206	0.00751508
4	1096400	Ty		Ty	0
4	1155300	YDR342C	HXT7	I	6	430.724	949.894	5325.86	50462.2	5.93	7.2	4.62	6.27	3.56445	3.78475	-0.151513
4	1160500	YDR343C	HXT6	I	0	346.63	2084.26	4502.73	51018.4	5.96	7.33	4.58	6.24	3.56616	3.41369	-0.478952
4	1207300	Ty		Ty	0
4	1233900	YDR380W	ARO10	N	1	270.228	2449.28	4615.58	7342.85	1.95	4.1	2.17	3.95	1.436	0.986105	1.63818
4	1278800	YDR406W	PDR15	I	5	632.754	1992.52	3507.7	5425.23	1.11	2.21	0.21	1.17	1.20948	1.29809	-0.232824
4	1308200	YDR420W	HKR1	CR	0	3815.49	2007.26	17717.3	7586.91	-1.03	-1.26	-1.25	-1.15	0.0422025	-0.447497	0.149012
4	1468700	YDR508C	GNP1	R	1	185.365	1552.14	9464.15	2426.05	-0.19	-1.01	0.06	-0.68	-0.340468	-0.455375	-0.122303
4	1475600	YDR516C	EMI2	I	0	938.619	590.12	1995.73	9775.59	4.16	4.83	2.01	3.81	2.12904	1.12158	0.260093
4	1490300	YDR525W-A	SNA2	N	2	1266.53	2693.71	226.916	431.525	0.88	2.14	0.51	1.72	-0.188442	0.187854	-0.156417
5	69300	YEL046C	GLY1	R	1	236.921	3411.29	17354.6	6231.14	1	0.44	2.25	1.06	-1.51636	-2.52221	-0.49106
5	85300	YEL034W	HYP2	N	0	1375.66	3927.56	6642.52	4690.53	-0.01	-0.88	-0.35	-1.02	0	-0.287285	0.437722
5	117800	Ty		Ty	1
5	123300	YEL017W	GTT3	N	1	136.855	1821.92	1530.79	966.546	-0.61	-0.36	-0.75	-0.65	0.368128	0.194569	0.292533
5	132900	YEL011W	GLC3	I	4	195.962	778.146	3719.93	34657.5	5.4	5.4	1.64	3	4.31064	4.34768	0.6956
5	242200	YER045C	ACA1	R	2	592.547	1558.48	773.863	563.258	0.06	1.12	0.25	1.35	-0.572656	-1.78421	0.0807456
5	264500	YER054C	GIP2	I	6	229.072	645.177	1005.25	3754.73	3.75	5.03	1.05	2.49	2.85704	4.71367	0.484997
5	280000	YER064C		R	0	633.26	2216.45	3582.87	1526.92	0.02	-1.56	0.89	-0.74	-0.692979	-0.917528	0.174274
5	292500	YER067W	RGI1	I	0	362.003	905.183	436.213	10274.8	6.54	7.72	3.36	5.43	3.58156	2.82919	0.235045
5	335600	YER088C	DOT6	I	1	836.825	3464.67	8013.91	13980.3	1.22	1.66	0.39	0.31	0.517318	0.648116	-0.192163
5	448600	Ty		Ty	0
5	448700	Ty		Ty	0
5	468100	YER150W	SPI1	I	5	569.983	1188.6	1060.69	11365.3	4.64	5.52	2.25	2.92	2.91547	4.41885	0.405751
5	497800	Ty		Ty	0
6	106700	YFL014W	HSP12	I	2	442.158	3786.97	1365.92	5635.89	4.67	6.72	1.34	3.83	7.67797	8.01955	0.323666
6	176800	YFR015C	GSY1	I	3	501.389	1896.28	3904.63	23366.1	4.93	5.19	0.75	2.19	4.62673	3.52446	0.282816
6	183300	YFR017C	IGD1	I	3	572.075	1705.53	1830.59	4265.65	3.81	4.78	0.95	2.99	2.98235	3.44936	0.43971
6	225100	YFR033C	QCR6	N	1	333.934	1554.51	5327.67	5799.53	1.78	2.5	1.88	2.44	0.208435	-0.0915169	-0.0624783
6	255600	YFR053C	HXK1	I	1	372.446	1438.95	6474.62	33798.1	5.31	6.5	2.84	4.33	5.19666	4.72308	0.0758029
7	20400	YGL255W	ZRT1	R	6	658.274	1846.75	9995.62	3709.89	-0.49	-3.48	1.67	0.89	-2.55387	-1.86685	-0.30732
7	148200	YGL188C-A		N	2	160.9	1182.74	16.6316	124.057
7	166200	YGL178W	MPT5	N	6	600.593	1843.55	1992.39	3073.75	-0.31	0.14	-0.44	-0.42	-0.331017	-0.391507	-0.000172938
7	271900	YGL126W	SCS3	CR	1	794.887	2116.52	3991.97	3554.63	-0.04	0.11	0.11	-0.3	0.384064	0.436272	-0.0221164
7	280100	YGL122C	NAB2	CR	0	1304.4	1004.5	5930.69	3304.76	0.14	0.18	0.04	0.03	-0.237354	-0.362582	0.112336
7	384900	YGL062W	PYC1	R	1	864.459	3288.05	6235.35	16553	1.06	1.65	1.59	1.82	-0.225932	-0.273379	0.576303
7	398200	YGL055W	OLE1	R	1	560.874	1974.75	4618.68	13813.4	0.68	-1.95	1.72	-1.49	-0.374587	-1.05214	-0.437265
7	413400	YGL045W	RIM8	N	2	708.113	2479.4	1689.62	4747.65	0.91	1.33	1.49	0.73	1.30996	0.994956	-0.0292996
7	483700	YGL008C	PMA1	R	1	1203.46	2738.61	56602	7202.87	-0.35	-2.44	-0.08	-2.13	0.265319	-0.690017	0.329934
7	536300	Ty		Ty	0
7	567100	Ty		Ty	0
7	574200	Ty		Ty	0
7	592800	YGR050C		N	1	1489.09	7335.48	85.4262	588.832	0.32	0.64	0.6	0.52	0.754388	0.803072	0.0690624
7	610100	YGR060W	ERG25	R	0	1175.13	3622.14	3617	1068.2	-1.15	-2.86	-0.77	-2.66	-0.186411	-1.27354	0.17438
7	625400	YGR067C		I	4	1140.47	1833.95	1116.21	5751.93	1.21	2.87	0.32	1.69	-0.589181	0.257783	0.230942
7	654300	YGR088W	CTT1	I	6	649.419	2166.12	1298.02	16051.7	6.29	6.26	1.49	2.5	5.29459	6.10045	0.108917
7	772100	YGR142W	BTN2	N	0	259.818	1666.91	2922.63	31115.2	5.81	4.97	5.91	3.5	0.38269	0.211395	0.263225
7	785800	YGR146C	ECL1	N	0	728.605	2806.77	591.179	1136.9	2.11	1.24	1.97	0.02	-0.404205	0.291828	0.235658
7	809800	YGR161C	RTS3	R	3	683.067	3896.06	2439.18	7145.5	3.38	2.65	3.73	2.47	-1.1292	-1.60345	-0.283822
7	822600	Ty		Ty	0
7	856800	YGR180C	RNR4	R	2	752.385	2135.08	1268.92	2421.26	-0.39	-1.51	0.02	-1	-0.405288	-0.984866	-0.130326
7	884200	YGR192C	TDH3	CR	3	2340.64	4477.83	46462.4	27679.6	0.03	-0.52	0.24	0.03	0.357903	0.740389	0.664754
7	987300	YGR249W	MGA1	I	7	338.751	2080.99	249.853	3118.04	4.18	3.83	3.58	2.2
7	994000	YGR250C		I	1	415.406	2148.84	1661.27	18373.8	2.84	2.19	2.08	1.57	-0.109794	-0.483582	-0.120673
7	1001500	YGR254W	ENO1	CR	0	902.66	2599.08	10784.9	28372.6	0.87	1.06	1.06	1.75	0.27589	-0.177666	0.981263
8	55600	YHL024W	RIM4	I	2	1199.1	3320.55	700.677	3269.33	0.41	1.92	-0.08	1.24	2.7865	2.59778	0.690101
8	122400	YHR007C	ERG11	R	1	1044.76	3652.64	5463.7	1226.85	-1.03	-3.42	-0.59	-2.75	-0.106665	-0.818436	0.337904
8	212800	YHR053C	CUP1-1	CR	0	929.127	2108.44	481.197	2181.63	4.26	5.19	5.16	4.99	0.382444	0.742831	0.0353934
8	214800	YHR055C	CUP1-2	CR	0	553.961	1128.13	304.745	2357.66	4.25	5.25	5.13	4.96	0.566685	0.876482	-0.0834541
8	236300	YHR071W	PCL5	N	1	873.603	1615.34	1237.14	1475.73	0.54	0.4	1.26	0.69	-0.266075	-0.474884	0.592264
8	297100	YHR096C	HXT5	I	0	386.627	1937.37	1219.77	12983.6	6.3	7.71	4.83	6.46	1.85488	2.76228	-1.91316
8	451800	YHR174W	ENO2	CR	0	2072.45	2353.09	40441.5	23686	0.34	-0.69	0.06	-0.24	0	0	1.13594
8	462200	YHR179W	OYE2	R	0	358.101	2357.6	2877.32	2617.84	2	1.67	3.43	3.92	-0.396041	-1.43151	-0.0526716
8	548900	Ty		Ty	0
9	54400	YIL154C	IMP2	CR	1	847.903	1942.57	6031.52	12586.1	0.49	1.3	0.56	1.3	0.486992	0.393352	0.197483
9	177700	YIL099W	SGA1	I	1	211.976	1065.15	1340.81	1249.69	0.69	2.07	0.08	1.03	2.69137	3.84528	-0.225059
9	249300	YIL057C	RGI2	N	1	1564.2	8425.72	89.4721	1993.81	4.51	6.58	4.34	6.18
9	382600	YIR016W		I	3	532.289	948.862	2966.15	7728.58	2.89	2.97	1.27	1.64	1.14964	2.76395	-0.438541
9	386800	YIR018C-A		I	6	913.469	3580.18	32.6509	68.0785
9	392400	YIR019C	MUC1	CR	0	1601.8	2722.29	7524.14	5228.93	-0.42	-0.11	-0.52	-0.33	0.485847	-0.0878956	0.131298
10	36700	YJL210W	PEX2	I	1	444.651	2101.89	1112.59	2401.39	1.2	1.32	0.08	0.17	0.780044	0.775744	0.183756
10	123300	YJL158C	CIS3	R	1	535.387	2168.36	4993.5	838.421	0.44	-1.38	0.16	-1.7	-0.260243	-0.984118	0.00757564
10	160100	YJL133C-A		I	2	620.512	2355.82	589.419	2374.97
10	337750	YJL052W	TDH1	I	1	607.341	1884.19	7723.9	21793.8	1.12	2.35	0.89	2.85	0.582477	0.232226	0.592646
10	361000	YJL042W	MHP1	I	1	581.242	2817.48	9507.72	31086.7	1.94	2.22	1.1	1.24	0.400178	0.800987	-0.290275
10	454100	YJR009C	TDH2	CR	0	1355.42	2497.08	20540.7	15624.5	-0.05	-0.48	0.19	0.59	0.455475	0.309007	0.857917
10	468700	YJR019C	TES1	N	0	760.273	795.355	2751.15	3502.18	0.68	1.55	0.69	1.38	-0.381027	-0.114269	-0.187096
10	473100	Ty		Ty	0
10	478600	Ty		Ty	0
10	521800	YJR045C	SSC1	I	1	919.304	1694.08	13217	21061.8	0.77	0.13	0.64	-0.39	0.0372844	0.276605	0.190261
10	623300	YJR104C	SOD1	I	2	411.723	1669.48	4912.89	9361.38	1.62	2.49	0.89	0.64	0	2.2125	0.72087
10	703600	YJR145C	RPS4A	R	1	876.131	1797.78	7614.15	1137.99	-1.25	-3.8	-1.02	-3.49	0.154211	-0.0298713	0.449875
10	714500	YJR151C	DAN4	CR	0	1979.83	1975.26	4078.44	3060.28	0.3	1.29	0.39	1.01	0.220501	0.056145	0.538918
11	21700	YKL217W	JEN1	I	7	665.72	1884.76	1844.24	17395.9	2.43	5.1	2.39	4.92	0.72275	0.227392	1.00658
11	68000	YKL201C	MNN4	N	2	511.806	1648.3	2695.87	3440.72	1.18	0.77	1.73	0.45	0.24417	-0.018709	0.0570701
11	99400	YKL182W	FAS1	R	1	570.655	2150.35	23685.3	4536.96	0.01	-2.67	-0.08	-2.51	-0.178451	-0.856625	0.47158
11	163900	YKL152C	GPM1	CR	0	1539.41	1576.18	11880.7	10968.8	0.5	0.04	0.4	0.55
11	166300	YKL151C		I	2	440.707	1230.85	4736.07	5711.85	2.45	3.01	0.01	1.53	2.64596	4.52653	0.159358
11	231400	YKL109W	HAP4	I	5	595.953	4118.67	2745.07	8801.33	2.45	1.07	0.97	0.11	-0.198112	0.318607	-0.16413
11	258700	YKL096W-A	CWP2	N	2	1478.43	3201.95	3111.77	450.445	0.27	-0.58	-0.21	-0.95	0.13332	-0.309957	0.0428305
11	322500	YKL062W	MSN4	N	5	653.737	2074.42	1963.3	3774.46	0.65	1.12	0.56	0.8	0.621041	-0.776086	-0.128992
11	328100	YKL060C	FBA1	R	0	323.274	1627.5	27160.5	17662.1	0.16	-0.41	0.06	0.06	0	0	0.51368
11	355900	YKL043W	PHD1	R	2	412.746	1673.26	3660.78	6188.41	0.35	0.49	0.76	1.03	-1.34398	-1.27253	-0.299376
11	369500	YKL035W	UGP1	I	1	466.27	2886.43	4060.55	21994.6	2.88	2.66	0.03	-0.08	2.18561	3.9479	0.0848375
11	382200	YKL032C	IXR1	N	1	718.179	1487.08	5178.43	12725.3	0.26	1.19	0.04	0.43	-0.576696	-0.766552	-0.2578
11	519000	YKR042W	UTH1	R	0	841.736	2337.23	21287.9	13946	-0.45	-0.6	-0.1	-0.22	0.10613	-0.770013	0.472161
11	615100	YKR093W	PTR2	I	5	766.643	1636.16	3886.92	5980.56	-0.25	-0.08	0.08	0.14	0.729736	0.516276	-0.880094
12	64300	YLL039C	UBI4	CR	0	383.905	2237.43	4979.71	25692.6	2.25	3.12	1.9	3.06	1.79825	2.43442	0.323548
12	84300	YLL028W	TPO1	N	2	828.211	2942.91	3991.95	1743.83	-0.23	0.07	-0.13	-0.1	0.413113	-0.294025	-0.141243
12	89400	YLL026W	HSP104	I	3	440.979	1515.77	9152.86	74810.4	4.69	4.86	4.33	4.03	1.74035	2.39721	0.110168
12	97100	YLL024C	SSA2	CR	0	1747.54	4611.04	36774.3	55816.4	0.7	-0.88	0.62	-1.95	-0.0301417	-0.0778017	0.404162
12	108400	YLL019C	KNS1	N	2	901.665	1763.87	4303.58	10221.8	1.58	2.16	1.08	2.14	1.29537	0.649318	0.111408
12	220400	Ty		Ty	1
12	253500	YLR056W	ERG3	N	0	597.356	1774.55	3598.54	942.022	-0.69	-3.1	-0.62	-3.11	-0.0372073	-1.03225	0.28785
12	368400	YLR109W	AHP1	N	3	359.079	1871.59	8572.61	12428.6	1.44	1.53	1.14	0.4	0	1.10668	1.27668
12	370700	YLR110C	CCW12	N	1	810.04	1214.3	10463.2	4851.1	0.44	-0.37	-0.06	-0.95	0.116146	-0.831449	0.0772896
12	389400	YLR121C	YPS3	CR	0	739.657	1634.48	2606.89	7126.88	-0.47	-0.46	0.38	-0.11	-0.356437	-1.25223	0.049305
12	424300	YLR141W	RRN5	CR	0	1080.56	3020.54	2044.27	2846.21	0.24	0.44	0.14	-0.07	-0.379051	0.306366	-0.477959
12	481300	Ty		Ty	0
12	490300	YLR162W-A		N	1	8842.1	13124.1	475.198	269.334
12	510600	YLR177W		I	5	535.676	1017.95	2121.12	14602.6	2.34	3.01	0.06	1.14	2.782	2.62672	-0.0778697
12	513500	YLR178C	TFS1	I	2	1131.24	1821.45	2353.43	10917.4	2.68	4.5	0.01	1.76	3.34985	4.99948	-0.09082
12	593700	Ty		Ty	0
12	660300	YLR258W	GSY2	I	2	305.588	1716.97	3649.65	20771.2	1.98	2.53	0.34	0.94	4.43554	4.34998	0.185676
12	663900	YLR259C	HSP60	CR	0	752.454	1620.9	7503.06	18466.3	1.26	0.84	1.41	0.3	-0.0892239	-0.187052	0.316056
12	677800	YLR266C	PDR8	N	0	358.823	1180.66	872.842	1262.23	0.37	0.69	0.44	1.38	-0.252964	-0.0737535	0.227359
12	728500	YLR300W	EXG1	R	0	65.0079	1566.56	6860.06	1612.64	-1.82	-3.02	-1.26	-2.33	0.0994819	-0.383859	0.0476125
12	783600	YLR327C	TMA10	I	3	920.604	2880.81	605.984	7853.8	6.35	7.47	5.92	7.02	2.82138	3.02397	0.226731
12	941700	Ty		Ty	0
12	954400	YLR414C	PUN1	R	1	705.618	1735.73	2148.97	5176.73	1.99	1.75	2.9	2.82	0.725289	0.888276	0.438059
12	954800	YLR415C		N	1	407.451	1733.14	382.485	1355.19	0.02	1.03	0.36	0.68	0.411885	1.35788	0.565439
12	981100	Ty		Ty	0
13	16800	YML128C	MSC1	I	2	426.008	1108.84	3335.51	19999.2	4.21	5.31	1.59	2.79	4.01052	6.12906	0.254106
13	70900	YML100W	TSL1	I	5	229.255	1741.81	8909.19	49893	2.55	3.46	0.13	1.04	4.32921	4.17501	-0.00336833
13	184800	Ty		Ty	0
13	196900	Ty		Ty	0
13	302900	YMR015C	ERG5	R	1	944.313	2092.18	3291.99	782.235	-0.2	-2.4	-0.13	-2.33	-0.250619	-1.04223	-0.00750132
13	306700	YMR016C	SOK2	R	3	1451.21	4623.44	4244.93	3052.99	0.07	-0.36	1.94	1.24	-1.04945	-2.0039	-0.183761
13	353200	YMR043W	MCM1	I	2	415.339	3079.71	7800.48	6454.22	1.18	0.78	0.58	-0.17	-0.0669853	0.520378	-0.26084
13	362300	Ty		Ty	0
13	378000	Ty		Ty	0
13	408800	YMR070W	MOT3	N	0	356.785	2547.71	2231.26	2007.78	0.3	-0.18	-0.32	-0.41	-0.208816	-0.214399	0.145607
13	431800	YMR081C	ISF1	I	3	111.154	1468.88	1572.78	7519.97	3.13	3.88	2.65	2.7	2.63792	1.54978	-0.344756
13	473100	YMR103C		I	1	278.133	807.836	234.271	1069.09	2.47	3.26	1.6	2.53	0.912835	0.839105	-0.193634
13	477900	YMR105C	PGM2	I	0	724.238	1741.17	2141.38	18448.6	4.89	5.54	0.96	2.91	5.02907	5.83055	0.198156
13	511000	YMR122W-A		N	0	375.145	670.078	2269.5	2527.52	-0.11	-1.4	-0.29	-1.28	0.413747	0.261545	0.289345
13	540600	YMR135C	GID8	I	1	1028.67	3438.14	1909.96	2238.75	1.53	2.59	1.04	1.86	0.929906	0.747041	0.0641539
13	557000	YMR145C	NDE1	R	5	507.885	2405.12	2409	2335.48	0.53	0.28	0.57	0.89	0.180397	-0.0196325	0.0843929
13	609300	YMR173W	DDR48	CR	2	945.553	2435.77	4338.07	18560.8	2.81	2.98	2.49	2.76	1.43088	1.00153	1.50767
13	653600	YMR195W	ICY1	I	6	661.962	1678.9	963.926	1443.85	2.05	1.64	0.19	0.63	0.804893	1.13475	-0.0666681
13	662000	YMR199W	CLN1	R	2	1023.21	2352.85	2316.27	423.721	-3.17	-3.13	-3.43	-3.13	-0.120948	-0.426195	-0.051287
13	774400	YMR251W-A	HOR7	I	5	595.468	5359.65	243.218	4003.13	3.18	3.77	3.85	3.93	3.02199	3.73706	-0.0063464
13	908400	YMR317W		CR	0	1683.44	2099.28	3701.56	4361.65	-0.22	0.5	-0.63	-0.16	-0.152453	-0.25046	-0.225208
14	87500	YNL289W	PCL1	R	0	433.077	1570.98	4230.31	1409.21	-0.66	-0.26	-0.6	-0.06	0.0241989	-0.562886	0.093289
14	101800	Ty		Ty	0
14	198300	YNL241C	ZWF1	I	5	165.041	1514.28	4587.59	10380.3	0.43	1.31	-0.02	0.67	0.541326	1.08994	-0.00918969
14	302000	YNL178W	RPS3	N	3	399.218	2607.07	6024.33	1107.08	-0.25	-2.39	-0.45	-2.38
14	480700	YNL078W	NIS1	CR	2	557.7	2214.72	3559.63	13410	-0.19	-0.06	-0.48	-0.37	-0.191303	0.000259833	0.056867
14	481200	YNL077W	APJ1	N	2	250.663	911.457	3833.08	16134.7	4.02	2.72	3.95	1.83	-0.499688	0.200093	-0.150975
14	519700	Ty		Ty	2
14	559600	YNL036W	NCE103	N	1	299.236	3339.07	779.556	5250.41	1.22	0.91	0.54	0.08	-1.68123	-0.548753	-1.01055
14	567400	Ty		Ty	0
14	576300	YNL031C	HHT2	N	2	1042.19	2892.7	2436.29	5471.19	0.77	0.32	1.04	0.53	-0.00786162	0.104551	0.0596674
14	576300	YNL030W	HHF2	R	2	1042.19	2892.7	1047.94	2621.26	0.03	-0.47	0.64	0.13	0.0745372	0.0875152	0.0515268
14	662300	YNR016C	ACC1	N	1	1087.57	5201.03	19016	6308.64	0.45	-1.94	0.36	-2.04	0.0765307	-0.500875	0.650374
14	692000	YNR034W-A		I	5	207.941	1224.1	454.624	3705.5	6.89	8.76	0.29	2.02	2.77275	6.70569	-0.613373
15	30800	YOL155C	HPF1	CR	0	1503.28	1586.11	43222.8	19820.4	-0.04	-0.15	-0.19	-0.25	-0.128609	1.5267	-0.959111
15	109800	YOL109W	ZEO1	R	1	561.251	1323.1	1623.38	3699.49	1.22	0.11	1.52	0.68	0.271001	1.00352	-0.321841
15	118300	Ty		Ty	0
15	160200	YOL086C	ADH1	CR	0	1376.87	2862.97	29294.8	23795.7	0.63	0.27	0.39	0.3	0	0	0.696308
15	161800	YOL084W	PHM7	I	5	504.096	1922.83	2001.94	17108.8	5.51	7.06	3.56	3.52	2.1192	4.71106	-0.179937
15	170600	YOL081W	IRA2	I	2	899.289	3938.8	8893.92	20887	1.37	1.26	1.07	0.86	-0.192975	-0.106191	0.213578
15	216600	YOL059W	GPD2	N	3	1378.93	3519.32	6954.06	16887.5	1.09	1.42	1.19	0.81	-1.02292	-0.0318424	0.0807362
15	232200	YOL052C-A	DDR2	I	4	337.78	1862.86	84.8006	3277.94	3.43	4.7	0.33	1.63	5.70822	5.81044	-0.33499
15	304900	YOL012C	HTZ1	N	0	835.955	1428.3	526.251	615.767	-0.34	-0.61	-0.47	-0.41	-0.209222	-0.518158	-0.294727
15	384900	YOR028C	CIN5	I	3	330.057	1459.13	1366.55	5168.11	4.18	3.05	1.74	0.84	1.82348	2.14886	0.382107
15	391700	YOR032C	HMS1	R	2	692.038	2600.63	506.775	1187.59	0.78	0.56	1.4	0.62
15	424500	YOR049C	RSB1	N	1	602.701	3237.21	975.41	1032.43	1.58	0.44	1.2	0.17	1.46877	1.66321	-1.47802
15	520800	YOR107W	RGS2	N	0	359.664	1644.41	1572.26	792.089	0.85	1.74	2.32	2.48	-1.51597	-2.32358	-0.835457
15	579800	YOR136W	IDH2	I	2	234.284	1341.19	2839	2518.95	0.02	-0.32	-0.48	-1.35	0.409632	0.509797	0.743648
15	595400	Ty		Ty	0
15	619400	YOR153W	PDR5	R	2	975.753	3607.78	12328.6	6451.45	0.53	-0.9	1.36	-0.54	0.498711	-0.491229	0.0436651
15	671300	YOR178C	GAC1	I	3	1228.57	2689.75	1143.79	7308.92	5.33	5.57	2.23	2.53
15	797100	YOR246C	ENV9	R	1	241.492	1595.15	2181.69	1300.98	-0.65	-1.98	-0.23	-1.59	-0.146715	0.0737506	-0.17889
15	836900	YOR273C	TPO4	I	2	530.614	1842.42	3346.99	5898.08	3.18	2.65	2.86	2.71	2.17707	0.957562	-0.635442
15	877900	YOR298C-A	MBF1	N	1	594.205	1230.96	4236.79	12026.2	2.27	1.84	2.67	1.26	0.525504	1.30332	-0.124206
15	882500	YOR302W		N	3	588.799	2748.38	36.1113	84.9054	-0.3	-1.03	-0.72	-1.19	-0.447013	-0.226593	-0.521905
15	882500	YOR303W	CPA1	N	3	516.196	2682.71	3301.54	2915.81	0.01	-0.36	-0.51	-1.06	-0.929594	-1.14951	-0.65004
15	908700	YOR317W	FAA1	I	3	856.551	3580.64	4614.13	16489.8	1.9	2.06	1.46	1.93	0.470252	0.329316	-0.224035
15	968300	YOR342C		N	0	657.796	2235.09	1394.95	529.234	-0.93	-2.05	-0.8	-2.22	-0.666067	-1.2859	-0.198027
15	970800	Ty		Ty	0
15	978800	YOR344C	TYE7	R	3	1311.47	4877.26	1104.84	1787.08	2.62	0.83	3.86	1.25	-1.94042	-2.06012	-0.603439
15	987400	YOR348C	PUT4	I	0	914.994	3811.48	1210.34	8301.2	3.06	3.9	3.7	4.15	1.18357	1.35241	-0.249687
15	1040900	YOR374W	ALD4	I	0	99.8924	936.789	4658.76	28988.3	4.26	6.06	3.19	5.46	0.567	0.205445	0.577931
15	1043600	YOR375C	GDH1	R	5	540.14	2000.89	5158.23	10837	0.3	-0.3	0.97	0.47	-0.25715	-1.24695	0.285123
16	40500	YPL265W	DIP5	N	2	613.563	3380.44	5606.43	10382.3	0.85	2.26	1.29	2.1	-0.384648	-0.490467	0.224218
16	57100	Ty		Ty	0
16	75200	YPL250C	ICY2	R	2	732.101	4762.09	3745.61	7495.6	3.77	2.53	4.36	2.36	-0.82551	-0.212334	0.962517
16	83900	YPL247C		I	2	615.367	1618.43	2411.91	8382.12	2.53	3.22	-0.15	0.43	2.4622	3.54608	0.63815
16	98900	YPL240C	HSP82	N	2	254.599	966.336	7619.76	41120	3.36	3.27	3.71	2.66	0.65251	1.40014	0.190616
16	114700	YPL230W	USV1	I	7	430.86	1681.72	957.531	5955.92	4.91	6.31	1.63	4.38	2.94774	4.90495	-0.0837457
16	214800	YPL177C	CUP9	N	3	537.544	1754.46	818.776	470.267	0.33	1.37	0.12	0.72	0.437898	0.390949	-0.192597
16	297200	YPL135W	ISU1	N	1	571.817	3386.11	3092.72	3905.94	1.03	1.09	1.28	0.92	-0.939142	-0.532074	-0.408352
16	339800	YPL111W	CAR1	N	2	331.649	1276.8	4010.94	4490.39	0.92	1.57	1.04	1.78	0.0377479	-0.954438	0.502982
16	425400	YPL067C		CR	0	419.522	1595.76	559.739	977.254	-0.27	-1.02	0.04	-0.77	0.0448638	-0.66816	0.123355
16	432200	YPL061W	ALD6	R	1	354.583	1383.54	17535.9	27343.9	1.98	1.12	2.17	1.27	-0.0788577	-1.29116	1.02503
16	503100	YPL024W	RMI1	R	0	728.236	1938.02	874.985	490.404	0.38	-0.17	1.35	1.35	-0.552267	-0.588011	-0.4417
16	503100	YPL026C	SKS1	R	0	1276.86	3026.85	2719.29	2233.11	0.71	-0.61	1.96	0.19	-1.20881	-1.96762	-0.897385
16	520300	YPL017C	IRC15	I	2	232.695	1621.27	1128.91	1701.01	0.61	1.35	-0.07	0.55
16	527000	YPL014W		I	3	779.259	1957.23	1149.35	5960.42	0.67	0.77	-0.06	0.16	1.44547	3.0551	0.66404
16	527000	YPL015C	HST2	I	1	779.259	1957.23	1115.15	2936.26	0.96	1.57	-0.25	-0.33	0.779661	0.8373	-0.0290276
16	641400	YPR035W	GLN1	R	4	755.809	3740.03	10824.9	10924.9	0.06	-1.38	1.31	-0.77	-0.117276	-1.45966	0.863369
16	645600	YPR036W-A		I	3	1055.25	7890.96	2503.1	4973.45
16	679000	YPR065W	ROX1	N	1	430.86	5321.93	2012.94	2461.02	2.36	1.05	2.71	0.5	-0.859483	-1.40867	-0.454056
16	701500	YPR080W	TEF1	CR	3	2324.38	2256.99	46788.9	26831.5	0.32	-1.29	0.07	-1.5
16	810000	Ty		Ty	0
16	822300	YPR145W	ASN1	R	0	738.544	1684.55	13376	10510.5	-0.51	-1.94	0.51	-0.74	-0.427598	-1.485	0.246245
16	829000	YPR149W	NCE102	I	1	834.92	2494.71	3571.09	7640.35	1.31	1.89	-0.04	0.07	1.32492	2.24253	0.190218
16	834400	YPR154W	PIN3	N	1	166.469	1398.65	1446.52	12994.3	2.26	2.83	2.27	2.23	-0.0468657	0.538745	0.118725
16	845100	Ty		Ty	0
16	855800	Ty		Ty	0
16	860500	YPR160W	GPH1	I	4	613.306	2088.22	3634.77	34802.6	4.85	5.44	0.33	2.94	4.89899	4.62418	-0.0809848
16	928200	YPR194C	OPT2	I	2	0	1038.76	531.045	1080.31	-0.21	-0.43	-0.33	-0.97	0.612493	-0.408638	0.168228
