# Supplementary material for: A dynamic interplay of nucleosome and Msn2 binding regulates kinetics of gene activation and repression following stress
Source: Oxford University Press journal article supplement (doi:10.1093/nar/gku176), 2014-03-05
Supplement: gku176_Supplementary_Data.zip [file gku176_Supplementary_Data.zip › nar-00096-v-2014-File012.xlsx]

## Sheet: Sheet1
Table S2. Global transcriptional response to activation of Msn2 and Msn2(6A)
Experiment 1: Strain Y4105 (leu2D ura3D MSN2) was grown on SC+2%glucose and shifted to SC+2%glycerol at time 0. Samples were taken at 20 min intervals for 1 hr (columns F-I)
Experiment 2: Strain Y4108 (leu2D ura3D PZ4EV-MSN2)was grown on SC+2%glucose and shifted to SC+2%glucose+1mM estradiol at time 0. Samples were taken at 10 min intervals for 1 hr and at 90 min (columns J-Q)
Experiment 3: Strain Y4108 (leu2D ura3D PZ4EV-MSN2(6A) PACT1-Z4EV)was grown on SC+2%glucose and shifted to SC+2%glucose+1mM estradiol at time 0. Samples were taken at 10 min intervals for 1 hr and at 90 min (columns Z-AG)
Experiment 4: Strain Y4108 (leu2D ura3D PZ4EV-MSN2 PACT1-Z4EV)was grown on SC+2%glucose and shifted to SC+2%glucose+1mM estradiol at time 0. Samples were taken at 10 min intervals for 1 hr and at 90 min (columns R-Y)
					0	20	40	60	0	10	20	30	40	50	60	90	0	10	20	30	40	50	60	90	0	10	20	30	40	50	60	90
Systematic Name	Gene Name	GO Biological Process	GO Molecular Function	GO Cellular Component	WT 0 downshift	WT 20 downshift	WT 40 downshift	WT 60 downshift	WT 0 control	WT 10 control	WT 20 control	WT 30 control	WT 40 control	WT 50 control	WT 60 control	WT 90 control	ZEV WT 0	ZEV WT 10	ZEV WT 20	ZEV WT 30	ZEV WT 40	ZEV WT 50	ZEV WT 60	ZEV WT 90	ZEV 6A 0	ZEV 6A 10	ZEV 6A 20	ZEV 6A 30	ZEV 6A 40	ZEV 6A 50	ZEV 6A 60	ZEV 6A 90
Q0017	Q0017				0.0991202	-0.85864	0.60189	1.73208	0.426392	1.03643	0.379905	0.29983	0.349901	0.28531	0.567205	0.293091	0.378356	0.140431	0.469991	-0.0573216	0.857753	0.557806	0.47766	0.404242	0.339109	0.397359	0.245468	1.04026	0.0978602	0.584064	0.275593	0.350284
Q0045	COX1	oxidative phosphorylation; electron transport chain; mitochondrial electron transport, cytochrome c to oxygen; aerobic respiration; oxidation-reduction process	electron carrier activity; heme binding; metal ion binding; iron ion binding; cytochrome-c oxidase activity; oxidoreductase activity	membrane; integral to membrane; mitochondrial inner membrane; mitochondrion; respiratory chain; mitochondrial respiratory chain complex IV	0.0650762	-2.8281	2.68592	3.52176	0.297397	0.755765	0.488606	0.892716	0.575021	0.807232	0.359135	0.122682	0.210737	0.888063	0.742706	0.893287	2.12318	0.909226	1.72551	-0.205506	0.0206067	0.906272	1.45135	0.218759	-0.866922	1.25372	1.12485	0.595719
Q0050	AI1	mRNA processing; cellular respiration; RNA-dependent DNA replication; oxidation-reduction process; homing of group II introns	RNA-directed DNA polymerase activity; RNA binding; cytochrome-c oxidase activity; endonuclease activity; nucleic acid binding	mitochondrion	-0.000889548	-2.32091	2.41236	2.95937	0.187386	0.476018	0.0922832	0.404375	-0.302729	0.129148	-0.191333	-0.339859	0.39072	0.585465	0.179624	0.865177	1.71022	0.306878	1.12052	-0.757931	-0.338633	2.24068	3.21669	1.8498	0.592061	2.86912	3.12331	1.53226
Q0055	AI2	mRNA processing; RNA splicing; aerobic respiration; RNA-dependent DNA replication; oxidation-reduction process	electron carrier activity; RNA-directed DNA polymerase activity; heme binding; RNA binding; iron ion binding; cytochrome-c oxidase activity; endonuclease activity; nucleic acid binding	integral to membrane; mitochondrion	0.00231621	-1.99606	1.77103	2.51743	-0.0142114	1.13693	0.257172	0.25065	0.0777129	-0.200277	-0.323882	-0.035022	0.747614	0.902495	0.934527	1.4941	2.11002	0.948178	1.02103	0.910559	0.460316	1.89542	2.08806	0.265347	-0.350627	1.74676	1.30795	1.07824
Q0060	AI3	mRNA processing; nucleic acid phosphodiester bond hydrolysis; RNA splicing; aerobic respiration; oxidation-reduction process; biological_process; intron homing	electron carrier activity; heme binding; DNA binding; hydrolase activity; iron ion binding; cytochrome-c oxidase activity; endonuclease activity; nuclease activity	membrane; integral to membrane; mitochondrion	-0.0946135	-2.79994	1.62823	3.01627		1.77672		0.267546	0.994156	-0.969547	-1.73326	-0.867039	1.42017	0.295123	0.133319	1.05442	1.81941	0.12454	1.13307	1.61073	0.858277	2.46718	1.92303	-0.0778653	-0.403848	1.2863	1.79116	1.37452
Q0070	AI5_ALPHA	mRNA processing; movement of group I intron; nucleic acid phosphodiester bond hydrolysis; RNA splicing; aerobic respiration; oxidation-reduction process; intron homing	electron carrier activity; heme binding; hydrolase activity; cytochrome-c oxidase activity; iron ion binding; endonuclease activity; nuclease activity	membrane; integral to membrane; mitochondrion	-0.0163733	-2.00459	1.8047	3.43495	0.0932867	0.106055	-0.0754276	0.550751	-0.268695	-0.306001	-0.459806	-0.228713	0.0333844	0.477597	0.119727	0.464054	1.06365	0.0126467	0.441898	-0.129105	0.756982	1.15189	2.05628	0.222823	-0.572939	1.26073	1.4019	1.42059
Q0075	AI5_BETA	nucleic acid phosphodiester bond hydrolysis; biological_process; intron homing	molecular_function; DNA binding; hydrolase activity; endonuclease activity; nuclease activity	mitochondrion	-0.531516	-1.99612	1.50547	2.78051	0.460374	0.192316	0.724708	0.291063	0.314964	0.252156	-0.19062	0.209584	0.381956	0.590247	0.6834	1.02968	2.26306	0.478515	1.17528	-0.241478	0.870725	1.47165	2.36277	0.981046	0.100662	1.93707	1.90348	1.62556
Q0080	ATP8	transport; ATP biosynthetic process; ATP synthesis coupled proton transport; proton transport; ion transport	hydrogen ion transmembrane transporter activity; proton-transporting ATP synthase activity, rotational mechanism; proton-transporting ATPase activity, rotational mechanism	membrane; mitochondrial proton-transporting ATP synthase complex, coupling factor F(o); proton-transporting ATP synthase complex, coupling factor F(o); integral to membrane; mitochondrial membrane; mitochondrion	-0.067475	-3.34452	3.67727	5.82393	0.414571	0.358253	-0.110221	0.3701	-0.860839	-0.670794	-1.13438	-0.170268	-0.172358	-0.488491	-0.14701	0.220436	0.784981	-0.373197	0.632497	-0.978045	-0.331114	0.350511	1.37266	-0.368181	-1.25693	0.589631	1.2472	0.961625
Q0085	ATP6	ATP synthesis coupled proton transport; transport; ATP biosynthetic process; proton transport; ion transport	hydrogen ion transmembrane transporter activity; proton-transporting ATPase activity, rotational mechanism; proton-transporting ATP synthase activity, rotational mechanism; ATPase activity	membrane; mitochondrial proton-transporting ATP synthase complex, coupling factor F(o); proton-transporting ATP synthase complex, coupling factor F(o); integral to membrane; mitochondrial inner membrane; mitochondrion	0.214026	-1.78607	2.15873	3.18719	-0.0239965	-0.0773664	-0.539462	0.259599	-1.03913	-0.523992	-0.790547	-0.185839	-0.216832	0.431211	-0.0589663	0.0869781	1.36521	-0.237068	0.583602	-0.980372	0.106933	0.90805	1.97796	0.00139268	-0.552026	1.2272	1.45471	0.675086
Q0105	COB	electron transport chain; respiratory electron transport chain; aerobic respiration; mitochondrial electron transport, ubiquinol to cytochrome c	electron carrier activity; metal ion binding; ubiquinol-cytochrome-c reductase activity; electron transporter, transferring electrons within CoQH2-cytochrome c reductase complex activity; oxidoreductase activity	membrane; mitochondrial inner membrane; integral to membrane; mitochondrial respiratory chain complex III; mitochondrion; respiratory chain	0.214114	-3.75602	5.64196	6.49286	0.0396474	-0.408428	-0.549601	-0.0117816	-0.579936	-0.270529	-0.542517	-0.607632	-0.387297	-0.495413	-0.297922	0.189184	0.910888	-0.465207	0.464946	-1.56607	-0.574633	1.13754	2.22171	0.456834	-0.0425818	1.96756	2.43184	0.40795
Q0110	BI2	mRNA processing; respiratory electron transport chain; RNA splicing	electron carrier activity; endonuclease activity; nuclease activity; oxidoreductase activity	membrane; mitochondrial inner membrane; integral to membrane; mitochondrion	0.601457	-1.93884	3.41742	4.75853		0.376103	-0.648945	1.04477	0.897331		-0.366747	-0.788437	1.05086	0.0446416	1.04113		1.84901		1.05687	0.374412	0.782861	0.638276	1.9013		-0.143499	0.618762	2.30796	1.04122
Q0140	VAR1	mitochondrial translation; translation	structural constituent of ribosome	ribosome; mitochondrial ribosome; ribonucleoprotein complex; mitochondrial small ribosomal subunit; mitochondrion	-0.0937094	-2.2584	1.55976	3.58508	-1.47457	0.388261	-0.503789	0.694817	-0.579302	0.5965	0.562806	-0.029465	0.331687	0.214237	-0.0546378	0.278117	1.62595	0.523376	0.529842	-1.82357	0.346555	0.858964	1.99108	0.183514	-0.155123	0.263333	2.14456	1.16438
Q0160	SCEI	mRNA processing; nucleic acid phosphodiester bond hydrolysis; RNA splicing; intron homing	hydrolase activity; endonuclease activity; nuclease activity	mitochondrion	-0.504236		0.870799	0.685		0.513798	0.552023	0.955049	0.129187	0.132862	0.0919189	-0.351537	-0.255697	1.05338	0.525408	1.72857	2.58584	0.519511	0.279943	-0.164633		2.08334	3.91934	2.92389	0.997013	4.68564	1.69756
Q0182	Q0182				-0.119695	-0.798468	0.94161	2.4651	-0.0134099	0.996941	0.081132	0.87445	0.284759	-0.0467271	-0.891716	0.150051	-0.535394	1.30417	1.5647	1.3894	1.37948	-0.141304	0.204826	-0.210224	-0.286055	0.856213	1.53571	0.0820847	-0.351698	0.839329	0.86165	0.273213
Q0250	COX2	electron transport chain; mitochondrial electron transport, cytochrome c to oxygen; oxidation-reduction process; aerobic respiration	metal ion binding; copper ion binding; cytochrome-c oxidase activity; oxidoreductase activity	membrane; mitochondrial inner membrane; integral to membrane; respiratory chain; mitochondrion; mitochondrial respiratory chain complex IV	-0.333675	-2.13635	2.52047	3.79214	0.849882	1.54226	0.862512	0.432535	0.677033	0.237975	-1.28771	-0.0233696	0.195449	1.44965	0.20772	-0.532576	1.76906	0.982724	1.60281	-0.260707	0.551043	1.34545	1.81955	0.605105	0.0151408	1.49134	2.28873	1.12046
Q0275	COX3	aerobic electron transport chain; respiratory electron transport chain; mitochondrial electron transport, cytochrome c to oxygen; aerobic respiration; oxidation-reduction process	cytochrome-c oxidase activity; heme-copper terminal oxidase activity; oxidoreductase activity	membrane; integral to membrane; mitochondrial inner membrane; mitochondrion; mitochondrial respiratory chain complex IV	-0.0321536	-3.2754	3.08372	4.93735	0.323666	1.07816	0.100235	0.350697	0.06496	0.615041	0.141286	0.209726	0.614874	0.68573	0.803552	-0.0183952	1.64985	0.297395	1.04117	0.183526	0.997324	1.60489	2.51919	0.478134	-0.389561	1.17996	2.02538	1.40129
Q0297	Q0297				-0.391489	-0.804254	0.844462	2.63137	0.00780022	-0.225406	-0.762715	-0.261722	-1.45153	-0.608372	-0.849614	-0.900059	-0.294617	0.46378	-0.377795	-0.0436758	0.761885	-0.798443	0.0928228	-0.892353	0.122161	0.807489	1.81496	0.129783	-0.532395	1.36969	1.46844	0.626511
YAL001C	TFC3	transcription from a RNA polymerase III hybrid type promoter; protein localization to chromatin; regulation of transcription, DNA-dependent; 5S class rRNA transcription from RNA polymerase III type 1 promoter; transcription, DNA-dependent; transcription from RNA polymerase III type 2 promoter	RNA polymerase III type 1 promoter sequence-specific DNA binding TFIIIB recruiting transcription factor activity; DNA binding; RNA polymerase III type 1 promoter sequence-specific DNA binding; RNA polymerase III type 2 promoter sequence-specific DNA binding TFIIIB recruiting transcription factor activity; RNA polymerase III type 2 promoter sequence-specific DNA binding; DNA binding, bending	nucleus; transcription factor TFIIIC complex; mitochondrion; nuclear condensin complex	0.203394	0.296464	0.125248	0.165344	0.355042	-0.0369308	0.277669	0.287853	-0.14032	-0.147285	-0.0914006	0.287532	0.298985	-0.0184884	0.174238	0.140155	-0.200655	-0.0957601	0.000218401	0.141524	0.381353	0.00783923	0.440588	0.286018	0.360887	0.194013	0.0191597	0.220355
YAL002W	VPS8	late endosome to vacuole transport via multivesicular body sorting pathway; transport; protein targeting to vacuole; protein transport	protein anchor; metal ion binding; zinc ion binding; GTPase binding	membrane; Golgi stack; late endosome; Golgi apparatus; CORVET complex	0.00316189	-0.0174177	-0.170539	-0.30605	0.135152	-0.382798	-0.140239	-0.0543231	0.15403	0.224305	0.170809	0.118273	-0.205859	-0.223561	0.011056	-0.506783	-0.0678391	0.0870842	0.41602	-0.106964	0.0674895	-0.0304391	0.0560775	0.277011	0.303076	0.414868	0.390821	0.119924
YAL003W	EFB1	translation; translational elongation	translation elongation factor activity; guanyl-nucleotide exchange factor activity	eukaryotic translation elongation factor 1 complex	0.415577	0.486206	-1.28516	-2.17107	0.354155	0.492881	0.517412	0.459042	0.808592	0.617285	0.666933	0.602401	0.457108	0.558132	0.463735	0.402505	0.40971	0.387324	0.14296	0.312437	0.359017	0.410793	0.125553	0.384601	0.382339	0.375748	-0.0933137	-0.304246
YAL004W	YAL004W				0.363686	1.03127	-1.26557	-1.26038	0.17177	-0.694234	-0.224062	-0.585251	0.7402	0.73604	0.0550102	0.942861	-0.246094	-0.35976	-0.286655	-0.309129	-0.332731	-0.292414	0.124523	1.14439	-0.265824	-0.469475	0.479603	0.411564	1.16847	0.50841	1.25719	1.22021
YAL005C	SSA1	protein folding; protein targeting to mitochondrion; SRP-dependent cotranslational protein targeting to membrane, translocation; cytoplasmic translation; response to stress; protein import into nucleus, translocation; protein refolding	ATP binding; nucleotide binding; unfolded protein binding; ATPase activity	nucleus; fungal-type vacuole membrane; cytoplasm; chaperonin-containing T-complex; fungal-type cell wall; cell wall; extracellular region; plasma membrane; polysome	0.256945	0.0420296	0.145728	0.238756	0.240229	0.246042	0.00135569	-0.208751	0.143952	0.125265	0.125659	0.82324	0.357625	0.329077	0.653781	0.316097	0.300073	0.943985	1.26406	3.02072	0.753439	0.497473	0.910012	1.90514	2.36545	2.35312	2.4488	3.54351
YAL007C	ERP2	transport; ER to Golgi vesicle-mediated transport; protein transport; vesicle-mediated transport	molecular_function	membrane; ER to Golgi transport vesicle; endoplasmic reticulum; integral to membrane; endoplasmic reticulum membrane	0.00780449	0.501016	-1.03689	-0.752822	0.0778655	-0.144278	-0.063091	0.125489	-0.229197	-0.189448	-0.361951	0.0992767	-0.0845721	0.225769	0.109788	0.413735	0.378387	-0.144223	-0.119201	0.0191709	0.0844181	0.18607	-0.061678	-0.0410457	-0.418413	0.0254401	-0.179541	-0.348409
YAL008W	FUN14	biological_process	molecular_function	membrane; integral to membrane; mitochondrial outer membrane; mitochondrion	-0.198433	-0.852773	1.11159	1.49545	0.156687	-0.535045	-0.234527	-0.103439	-0.250176	0.272085	0.0201143	0.614035	-0.288559	-0.026823	0.198073	-0.0897016	0.0922998	0.361654	0.557421	0.69275	-0.234456	-0.18568	0.128477	0.209014	0.343124	0.740909	1.00351	0.986974
YAL009W	SPO7	sporulation resulting in formation of a cellular spore; negative regulation of phospholipid biosynthetic process; nuclear envelope organization; lipid metabolic process	phosphoprotein phosphatase activity	membrane; nuclear membrane; nucleus; endoplasmic reticulum; integral to membrane; Nem1-Spo7 phosphatase complex; endoplasmic reticulum membrane	-0.0471686	-0.0516455	0.135595	0.186429	0.00734943	-0.0915436	0.0261722	-0.0307491	-0.149801	0.236194	0.000524572	0.132904	-0.154073	-0.0703968	0.160287	0.298232	0.503316	-0.136254	0.179565	0.0602006	0.0430474	-0.000992999	0.200153	0.193423	0.0344446	0.154825	0.271475	0.0469112
YAL010C	MDM10	protein import into mitochondrial outer membrane; phospholipid transport; mitochondrial outer membrane translocase complex assembly; mitochondrial genome maintenance; establishment of mitochondrion localization; protein complex assembly; mitochondrion organization	molecular_function	membrane; ERMES complex; integral to mitochondrial outer membrane; integral to membrane; mitochondrion; mitochondrial outer membrane; mitochondrial sorting and assembly machinery complex	0.217011	-0.891014	0.613379	1.09191	-0.390261	-0.262362	0.104382	-0.133697	-0.198485	0.384911	-0.175796	-0.161293	0.410464	-0.352149	-0.155858	-0.232478	0.136672	-1.31945	-0.29455	-0.0960409	0.140379	0.154773	-0.334925	-0.212758	-0.697647	0.0149072	-0.327625	-0.0433853
YAL011W	SWC3	chromatin remodeling; regulation of transcription, DNA-dependent; histone exchange; transcription, DNA-dependent; endoplasmic reticulum organization; chromatin modification	molecular_function	Swr1 complex; nucleus; mitochondrion	-0.0243348	0.137501	-0.029704	-0.290199	-0.0233687	-0.142897	-0.158924	-0.165216	-0.316298	-0.357807	-0.294542	-0.346849	-0.467438	-0.266454	-0.576544	-0.395188	-0.220765	-0.285108	-0.214367	-0.65083	-0.0382267	0.0164411	-0.455	-0.582519	-0.552785	-0.889726	-0.462078	-0.128061
YAL012W	CYS3	cysteine biosynthetic process via cystathionine; cellular amino acid biosynthetic process; transsulfuration; cysteine biosynthetic process	cystathionine gamma-lyase activity; lyase activity; L-cystine L-cysteine-lyase (deaminating); catalytic activity; L-cysteine desulfhydrase activity; pyridoxal phosphate binding	nucleus; cytoplasm	0.0835712	-0.0232255	-0.489399	-1.39677	0.0641583	0.23281	-0.0986219	-0.182014	-0.551322	-0.150884	0.032345	0.308226	0.506971	-0.0917632	-0.182366	-0.408069	-0.563663	-0.318374	-0.110176	0.57041	0.397041	-0.0833161	-0.432831	-0.167255	0.0577239	-0.498712	-0.388487	0.286321
YAL013W	DEP1	regulation of DNA-dependent DNA replication initiation; regulation of transcription, DNA-dependent; negative regulation of transcription from RNA polymerase II promoter; regulation of transcription from RNA polymerase II promoter; negative regulation of chromatin silencing at telomere; negative regulation of phosphatidylserine biosynthetic process by negative regulation of transcription from RNA …	molecular_function	nucleus; Rpd3L complex; Rpd3L-Expanded complex; cytoplasm	0.47324	-0.0825693	0.84918	1.14656	0.472589	0.733608	0.358157	0.0663599	0.321668	0.376746	0.144703	0.0978946	0.228966	0.476341	0.170102	-0.101428	0.15894	0.317276	0.547337	0.268688	0.660279	0.427321	0.189168	0.281642	0.23657	0.118423	0.209249	0.29345
YAL014C	SYN8	transport; protein transport	SNAP receptor activity	membrane; endosome membrane; endosome; integral to membrane	0.0600721	-0.429162	0.717849	0.91226	0.0130805	-0.035001	0.0112921	-0.127035	0.10022	-0.048589	0.149767	0.143301	-0.0292056	0.0283509	0.351212	0.332878	0.0368339	0.0353559	0.103189	0.284998	0.12107	0.0137427	-0.039937	-0.119105	-0.142205	-0.168156	-0.0686151	-0.212417
YAL015C	NTG1	base-excision repair, AP site formation; metabolic process; DNA repair; base-excision repair; cellular response to oxidative stress; positive regulation of mitochondrial DNA replication; response to DNA damage stimulus	DNA binding; oxidized pyrimidine nucleobase lesion DNA N-glycosylase activity; DNA-(apurinic or apyrimidinic site) lyase activity; hydrolase activity; catalytic activity; endonuclease activity; hydrolase activity, acting on glycosyl bonds; oxidized purine nucleobase lesion DNA N-glycosylase activity	nucleus; mitochondrion	-0.059421	-0.453988	0.578209	0.586626	0.253784	-0.153623	-0.0271144	-0.175884	0.163884	0.0997027	0.137693	0.17531	-0.117052	-0.204718	-0.030411	0.199602	0.189077	0.167549	0.126132	-0.0131316	-0.138673	-0.206999	0.135954	0.345922	0.191234	0.631334	0.655587	0.483539
YAL016W	TPD3	mitotic spindle assembly checkpoint; regulation of translation	protein serine/threonine phosphatase activity	nucleus; spindle pole body; mating projection tip; cellular bud tip; protein phosphatase type 2A complex; cytoplasm; cellular bud neck	-0.17442	-0.337704	0.0164692	0.194341	0.0563931	-0.0165076	0.187615	0.160847	0.326647	0.170636	0.292647	0.130665	0.0647205	-0.0035924	-0.0646849	-0.00459589	-0.244704	0.0827777	0.0677426	0.057122	0.0726174	-0.0545086	-0.0715313	-0.0212269	0.230595	0.104173	-0.139131	0.206929
YAL017W	PSK1	phosphorylation; negative regulation of glycogen biosynthetic process; signal transduction; regulation of (1->6)-beta-D-glucan biosynthetic process; protein phosphorylation; regulation of translation	ATP binding; kinase activity; protein serine/threonine kinase activity; nucleotide binding; protein kinase activity; signal transducer activity; transferase activity; transferase activity, transferring phosphorus-containing groups	cytoplasm	0.0969114	-0.588075	1.63213	2.06824	0.349908	0.0509433	0.209394	0.183418	0.540998	0.177786	0.411107	0.761444	0.201816	0.361754	0.36627	0.216451	0.289452	0.711493	0.713902	1.15635	0.114054	0.143412	0.10806	0.332341	0.718085	0.77406	0.976108	2.16867
YAL019W	FUN30	chromatin silencing at silent mating-type cassette; heterochromatin maintenance involved in chromatin silencing; DNA repair; chromatin silencing at telomere; DNA double-strand break processing; ATP-dependent chromatin remodeling; chromatin silencing at rDNA; heterochromatin assembly involved in chromatin silencing; response to DNA damage stimulus; chromatin modification	DNA binding; ATP binding; helicase activity; nucleic acid binding; hydrolase activity; chromatin binding; nucleotide binding; DNA-dependent ATPase activity	nucleus; mating-type region heterochromatin; chromosome; mitochondrion; chromosome, centromeric region	-0.322229	1.76722	-2.96309	-2.83798	-0.333706	0.0679999	0.083228	-0.255822	-0.0982121	-0.052601	0.0250446	-0.65221	-0.337733	-0.239328	-0.441037	-0.788562	-0.763346	-0.66682	-0.766302	-1.25227	-0.200493	-0.148	-0.446774	-0.573157	-0.332142	-0.542433	-0.875583	-0.633855
YAL020C	ATS1	tRNA wobble uridine modification; microtubule cytoskeleton organization; microtubule-based process; budding cell bud growth	molecular_function	cytoplasm	0.314278	0.322612	0.283029	0.0776616	0.354359	0.329196	0.100667	-0.0545663	-0.162077	0.0176789	-0.0472004	-0.0803478	0.241138	0.38286	0.636781	0.550029	0.794844	0.431421	0.34511	0.209966	0.19911	0.61953	0.86191	0.588651	0.375182	1.0583	1.0513	0.560387
YAL021C	CCR4	traversing start control point of mitotic cell cycle; regulation of transcription, DNA-dependent; DNA replication; nuclear-transcribed mRNA catabolic process, deadenylation-dependent decay; transcription, DNA-dependent; replication fork protection; DNA replication checkpoint; transcription elongation from RNA polymerase II promoter; regulation of transcription from RNA polymerase II promoter; pos…	poly(A)-specific ribonuclease activity; exonuclease activity; RNA binding; metal ion binding; hydrolase activity; 3'-5'-exoribonuclease activity; nuclease activity	nucleus; Cdc73/Paf1 complex; cytoplasmic mRNA processing body; cytoplasm; CCR4-NOT core complex	0.183201	0.357526	0.522643	0.647737	-0.569191	0.921194	-0.237949	-0.412268	0.0473257	-0.0282745	0.0965106	-0.271743	0.366059	-0.162568	-0.118791	-0.24058	-0.0448347	-0.292983	-0.0285091	1.54617	0.321671	-0.0801268	-0.0538476	0.124434	0.0460918	-0.943179	-0.451442	0.0243283
YAL022C	FUN26	transport; transmembrane transport; nicotinamide riboside transport; nucleoside transport	nucleoside transmembrane transporter activity; nicotinamide riboside transmembrane transporter activity	membrane; fungal-type vacuole membrane; integral to membrane; intracellular	-0.0998803	0.207562	-0.421239	-0.863872	0.236195	-0.102012	0.0734491	0.150949	0.0833885	0.310665	0.0774846	0.177936	-0.0742872	0.263404	0.398185	0.460062	0.708703	0.324468	0.410689	0.021503	-0.00737635	0.119984	0.0937026	0.0779723	-0.072467	0.307468	0.299521	-0.0906605
YAL023C	PMT2	regulation of endoplasmic reticulum unfolded protein response; protein glycosylation; protein O-linked mannosylation; protein exit from endoplasmic reticulum; ER-associated misfolded protein catabolic process; protein O-linked glycosylation	transferase activity, transferring glycosyl groups; mannosyltransferase activity; transferase activity; dolichyl-phosphate-mannose-protein mannosyltransferase activity	membrane; endoplasmic reticulum; dolichyl-phosphate-mannose-protein mannosyltransferase complex; integral to membrane; endoplasmic reticulum membrane	0.0801923	0.303205	-0.572355	-0.142746	0.0232441	0.450431	0.00722837	0.0877855	0.0579844	0.0307788	0.085341	0.0476511	0.316681	0.223752	0.0509668	0.233501	0.376455	0.151501	0.193523	0.922428	0.483784	0.479994	0.36285	0.402032	-0.135425	0.0484799	0.0297404	0.0183245
YAL024C	LTE1	mitosis; vesicle-mediated transport; small GTPase mediated signal transduction; cell division; regulation of exit from mitosis; mitotic spindle orientation checkpoint; regulation of small GTPase mediated signal transduction; cell cycle	guanyl-nucleotide exchange factor activity	intracellular; cytoplasm; cellular bud	-0.0397738	0.725993	-1.40852	-1.33914	0.0414761	-0.0887125	-0.00406605	-0.100584	-0.106369	-0.145807	0.297555	0.138584	0.0660477	0.221521	0.131025	-0.060812	-0.335025	0.0415392	-0.157317	0.127828	-0.158937	0.00962146	-0.289536	-0.237996	0.150583	-1.14215	-0.30212	-0.33585
YAL025C	MAK16	maturation of 5.8S rRNA from tricistronic rRNA transcript (SSU-rRNA, 5.8S rRNA, LSU-rRNA); maturation of LSU-rRNA from tricistronic rRNA transcript (SSU-rRNA, 5.8S rRNA, LSU-rRNA); cell cycle; ribosomal large subunit biogenesis	molecular_function	nucleus; nucleolus; preribosome, large subunit precursor	0.135251	1.79967	-2.92844	-3.56552	0.311422	0.719738	0.0179619	-0.464849	-0.259672	-0.138654	-0.270004	-0.880878	-0.0199334	0.00896323	-0.264753	-0.489558	-0.642336	-0.928083	-1.1692	-1.65034	-0.0548747	0.162997	-0.668227	-0.483139	-0.868627	-1.0953	-1.39359	-1.57226
YAL026C	DRS2	intracellular protein transport; ribosomal small subunit assembly; phospholipid translocation; phospholipid transport; endocytosis; post-Golgi vesicle-mediated transport; cation transport	magnesium ion binding; metal ion binding; hydrolase activity; ATP binding; cation-transporting ATPase activity; nucleotide binding; phospholipid-translocating ATPase activity	membrane; Golgi apparatus; integral to membrane; trans-Golgi network	0.295887	0.765543	-0.894004	-0.951311	0.12158	0.212766	0.0957075	0.35071	0.26339	-0.0398146	0.077811	0.150814	0.166623	0.280512	0.240136	0.329374	0.406826	0.18735	0.227769	0.215446	-0.0108456	0.263387	0.274907	0.0741158	0.238238	0.535683	0.285779	0.625873
YAL027W	SAW1	DNA repair; positive regulation of endodeoxyribonuclease activity; double-strand break repair via single-strand annealing, removal of nonhomologous ends; response to DNA damage stimulus	5'-flap-structured DNA binding; 3'-flap-structured DNA binding	nucleus	-0.174477	-0.523327	0.801815	0.924606	-0.0899762	-0.500769	-0.277881	0.115923	-0.0275991	0.235534	0.261439	0.0901417	-0.0464924	-0.233209	0.18511	-0.0833191	0.189958	0.128152	0.0464289	-0.211874	0.0156957	0.265587	0.157355	0.177232	0.282708	-0.255637	0.329451	-0.141046
YAL028W	FRT2	response to stress	molecular_function	membrane; endoplasmic reticulum; integral to membrane; endoplasmic reticulum membrane	-0.273599	-1.71246	1.62504	1.98744	-0.690285	-0.901422	-0.118867	0.171078	-0.399747	-0.114797	0.461579	0.620657	-0.270228	0.181272	-0.083649	0.539832	1.1407	1.89667	1.34068	2.21066	-0.614805	-0.822713	0.656421	1.32258	1.33159	1.60278	1.85726	1.92498
YAL029C	MYO4	transport; intracellular mRNA localization; endoplasmic reticulum inheritance; mating type switching; mRNA transport	actin binding; actin filament binding; ATP binding; motor activity; nucleotide binding; microfilament motor activity; calmodulin binding	myosin V complex; myosin complex; cellular bud tip; mitochondrion; cellular bud; filamentous actin	-0.209078	0.357008	-1.05635	-1.31053	-0.275643	0.242267	0.11681	-0.0244522	0.416554	-0.155196	0.1149	-0.304377	0.271143	0.160287	-0.26745	-0.254324	-0.207789	-0.15215	-0.286186	-0.0895926	0.0499369	0.130053	-0.257174	-0.379204	0.0252569	-0.627465	-0.635762	-0.223187
YAL030W	SNC1	vesicle fusion; endocytosis; vesicle-mediated transport; exocytosis; Golgi to plasma membrane transport	SNAP receptor activity	transport vesicle membrane; membrane; cellular bud neck; trans-Golgi network; endomembrane system; endosome; SNARE complex; integral to membrane; plasma membrane	0.354764	-0.162788	0.851343	1.02467	0.23105	-0.385697	-0.293546	0.061023	-0.225451	-0.11241	-0.112315	0.1086	0.0850388	-0.106162	0.0693165	0.280595	-0.10889	0.080247	0.149412	0.559335	-0.0344542	-0.0491034	0.0461058	0.237584	0.414426	0.454493	0.555255	0.809524
YAL031C	GIP4	chromosome segregation; regulation of phosphoprotein phosphatase activity	protein phosphatase type 1 regulator activity; protein phosphatase 1 binding	cytoplasm	-0.11981	-0.517765	0.825766	1.12963	-0.103328	-0.729318	0.0637261	-0.00299426	-0.120742	-0.180212	-0.273458	-0.0740225	-0.0533287	-0.304588	-0.117302	-0.0695859	-0.0866911	0.0062438	-0.000302564	0.0301068	-0.265731	-0.39186	-0.0353675	0.170831	0.0336416	0.198245	0.124496	-0.0123871
YAL032C	PRP45	mRNA processing; generation of catalytic spliceosome for second transesterification step; mRNA splicing, via spliceosome; RNA splicing	first spliceosomal transesterification activity; second spliceosomal transesterification activity	U2-type catalytic step 2 spliceosome; nucleus; spliceosomal complex; U2-type catalytic step 1 spliceosome; post-mRNA release spliceosomal complex	-0.00121879	-0.237491	0.549925	0.657099	0.209379	-0.0031568	0.00767159	-0.284338	-0.0883708	-0.245728	-0.0116722	-0.172918	0.141475	-0.212942	-0.210394	-0.415234	-0.649454	-0.302845	-0.126326	-0.238347	0.266419	-0.20373	-0.202247	-0.111463	-0.108499	-0.458015	-0.0774693	-0.0830332
YAL033W	POP5	intronic box C/D snoRNA processing; mRNA cleavage; rRNA processing; tRNA processing	RNA binding; hydrolase activity; ribonuclease MRP activity; ribonuclease activity; ribonuclease P activity	ribonuclease MRP complex; nucleus; nucleolar ribonuclease P complex; cytoplasm	0.263855	-0.0704911	-0.0699744	-0.805749	0.239274	0.0870692	0.0788089	0.156642	-0.46887	-0.104883	-0.576764	-0.47131	0.00985086	0.432516	0.414751	0.600029	0.572432	-0.0432625	-0.102612	-0.554031	-0.102534	0.693559	0.953347	0.616113	-0.20415	0.738022	0.885105	0.0293175
YAL034C	FUN19	biological_process	molecular_function; DNA binding	cellular_component	0.123399	-0.840683	1.05531	1.36955	0.0553734	0.132001	0.0708257	-0.0258751	0.371558	0.26424	0.257947	0.224323	0.451003	-0.0247111	-0.0815854	-0.192308	0.204134	0.759521	0.737256	1.24922	0.0951462	-0.214028	0.624979	1.89073	2.5178	2.4245	2.55146	2.52856
YAL034W-A	MTW1	chromosome segregation; protein localization to kinetochore; cell division; cell cycle; mitosis	molecular_function	spindle pole; nucleus; chromosome; condensed chromosome kinetochore; kinetochore; chromosome, centromeric region; nuclear MIS12/MIND complex	-0.00917371	0.0524664	-0.714918	-1.0856	0.138067	-0.588826	-0.0713213	-0.0780173	-0.326439	-0.288439	-0.354884	-0.0533407	-0.0217286	0.150366	-0.44775	-0.20372	0.00233689	-0.291033	0.0165351	-0.283289	0.0502106	-0.359015	-0.2457	-0.249169	-0.14711	-0.591336	-0.637451	-0.572484
YAL035W	FUN12	translational initiation; regulation of translational initiation; maturation of SSU-rRNA from tricistronic rRNA transcript (SSU-rRNA, 5.8S rRNA, LSU-rRNA); GTP catabolic process; translation	ribosome binding; translation initiation factor activity; nucleotide binding; GTP binding; GTPase activity	cytosolic small ribosomal subunit; mitochondrion; cytoplasm	-0.0307873	0.382838	-1.19936	-1.84051	0.09182	0.397907	0.414061	0.0479916	0.169591	0.044863	0.129776	-0.160093	0.159922	0.102	-0.00428678	-0.187823	-0.45189	-0.249876	-0.440572	-0.247779	0.221349	0.0145922	-0.239277	-0.026438	0.161266	-0.44405	-0.728221	-0.527726
YAL036C	RBG1	cytoplasmic translation	nucleotide binding; GTP binding	polysomal ribosome; cytoplasm; polysome	0.126775	0.854624	-1.20368	-2.22431	0.390344	0.502444	0.283982	-0.0434898	-0.110887	0.157219	0.0198607	-0.367731	0.0797728	0.311402	0.0157238	-0.0486745	-0.138284	-0.337106	-0.596036	-1.10082	0.310877	0.239397	-0.174301	-0.199636	-0.386502	-1.00419	-0.762201	-0.847846
YAL037W	YAL037W	biological_process	molecular_function	cellular_component	-0.15973	0.348639	0.389322	-0.265435	-0.0235907	-0.782015	-0.225139	0.405522	0.0683115	0.310386	0.0920619	-0.0504754	-0.494226	-0.167656	0.0922168	-0.0986335	0.319957	-0.671081	0.104369	-0.0634955	-0.476668	0.0181559	-0.268861	-0.553389	-0.532895	-0.287339	-0.42089	-0.863288
YAL038W	CDC19	phosphorylation; pyruvate metabolic process; metabolic process; glycolysis	magnesium ion binding; ATP binding; pyruvate kinase activity; kinase activity; catalytic activity; potassium ion binding; metal ion binding; nucleotide binding; transferase activity	cytoplasm; plasma membrane	0.842653	-0.292131	0.124568	0.800998	0.422497	0.852845	0.616951	0.689552	0.823185	0.471204	0.622844	0.583838	0.893096	0.672663	0.461756	0.430585	0.345563	0.279853		0.831066	0.587581	0.611953	0.16478	0.561289	0.669258	0.184913		0.0845849
YAL039C	CYC3	cytochrome c-heme linkage	metal ion binding; lyase activity; holocytochrome-c synthase activity	membrane; mitochondrial inner membrane; mitochondrial intermembrane space; mitochondrion	0.157994	-0.434199	0.915181	0.879337	0.175543	0.244849	0.016877	-0.141464	-0.0718272	0.0136378	0.113873	0.175468	0.0468679	0.018211	-0.0872131	-0.197301	-0.19241	-0.235814	-0.0956673	0.40346	0.376489	0.213383	0.241691	0.314359	0.0184924	-0.196114	-0.0669509	0.271621
YAL040C	CLN3	regulation of transcription involved in G1/S phase of mitotic cell cycle; regulation of cell size; cell division; vacuole organization; vacuole fusion, non-autophagic; cell cycle; regulation of cyclin-dependent protein serine/threonine kinase activity	cyclin-dependent protein serine/threonine kinase regulator activity	nucleus	-0.614972	0.100925	-1.12879	-0.48212	0.625622	0.725488	0.200536	0.0269872	-0.188987	0.607661	0.184959	-0.199799	0.900389	-0.168376	0.154526	-0.111509	0.0327483	0.610852	-0.0253306	1.30001	0.624026	0.010341	0.58288	0.19546	0.718094	-0.295705	0.105045	0.300486
YAL041W	CDC24	establishment of cell polarity; small GTPase mediated signal transduction; regulation of exit from mitosis; regulation of Rho protein signal transduction; intracellular signal transduction	guanyl-nucleotide exchange factor activity; phospholipid binding; Rho guanyl-nucleotide exchange factor activity	nucleus; cellular bud tip; incipient cellular bud site; mating projection tip; cytoplasm; cellular bud neck	-0.248212	-0.552915	0.449089	0.540921	0.0237571	0.155197	0.0740921	0.272762	-0.0220451	-0.11735	-0.130391	-0.0111224	0.268802	-0.145804	0.0599886	-0.186822	-0.507855	-0.413304	-0.42452	-0.327498	0.351374	0.0791492	0.0628985	0.0680088	-0.156005	-0.136013	-0.178268	-0.219951
YAL042C-A	YAL042C-A				0.291704		0.800218	0.606963		2.29596	1.01564	-0.0840469	0.942416	0.78966	-0.290389	0.177953	1.33861	-0.241203	-0.27646	-0.155721	0.984485	0.931465	-0.0830626	0.00511929	0.247943		-0.659391	0.16915		0.974837	-0.779883	-0.812299
YAL042W	ERV46	transport; ER to Golgi vesicle-mediated transport; protein transport; vesicle-mediated transport	molecular_function	ER to Golgi transport vesicle; membrane; endoplasmic reticulum; integral to Golgi membrane; integral to endoplasmic reticulum membrane; Golgi apparatus; integral to membrane; endoplasmic reticulum membrane; Golgi membrane	0.350198	0.254347	0.483112	0.38828	0.303528	0.299293	0.258893	0.251624	0.465914	0.379277	0.321672	0.499395	0.362292	0.565851	0.536584	0.752175	1.08794	0.523395	0.59311	0.634509	0.48253	0.723638	0.474786	0.499805	0.229873	0.647482	0.479165	0.312295
YAL043C	PTA1	mRNA processing; termination of RNA polymerase II transcription, poly(A)-coupled; mRNA cleavage; termination of RNA polymerase II transcription, exosome-dependent; mRNA polyadenylation; tRNA processing	RNA binding	nucleus; mRNA cleavage and polyadenylation specificity factor complex; mRNA cleavage factor complex	-0.182315	0.0270038	-0.576824	-0.248135	-0.305495	0.0325659	-0.0780527	-0.10306	0.0835761	-0.131163	-0.0343028	-0.289073	-0.164862	-0.310435	-0.169546	-0.460649	-0.301855	-0.174102	-0.413986	0.27142	0.0261768	-0.295103	-0.211169	-0.305466	0.0735262	-0.111289	-0.485216	-0.108555
YAL044C	GCV3	glycine decarboxylation via glycine cleavage system; glycine catabolic process; one-carbon metabolic process; protein lipoylation	glycine dehydrogenase (decarboxylating) activity	glycine cleavage complex; mitochondrion	0.204616	0.029292	-0.0956853	-0.422997	0.428019	-0.160113	-0.189474	0.0517118	0.0649272	0.335834	0.407305	0.491523	0.259623	0.201726	-0.0507966	0.210825	0.203241	-0.0540569	0.0797949	0.189817	0.0435081	-0.0746993	-0.356791	-0.240755	-0.357665	-0.266987	-0.35529	-0.885958
YAL044W-A	YAL044W-A	biological_process	molecular_function	cellular_component	0.198112	0.256904	-0.00421196	0.37429	-0.0872362	-0.327916	-0.0758817	-0.127887	-0.377005	-0.0278343	-0.129275	-0.0381461	-0.0902425	-0.213416	0.0493576	0.112597	-0.407421	-0.0585755	-0.073149	0.123371	-0.356685	-0.423769	-0.0349149	0.1488	0.00675427	0.283124	0.40328	0.151536
YAL046C	AIM1	biological_process	molecular_function	cellular_component	0.336151	0.318036	0.624134	0.0846476	0.155816	-0.10059	0.078221	-0.117194	0.0706463	0.264649	0.132202	0.380666	0.091367	0.263707	0.31705	0.362094	0.345818	0.15449	0.262172	0.199177	-0.14685	-0.132189	-0.148259	-0.0831637	-0.0417821	0.138599	0.0472586	-0.302333
YAL047C	SPC72	mitotic sister chromatid segregation; karyogamy; cell division; mitotic spindle elongation; mitotic spindle orientation checkpoint; nuclear migration along microtubule; cell cycle; microtubule nucleation	structural constituent of cytoskeleton	cytoskeleton; outer plaque of spindle pole body; spindle pole body; cytoplasm	-0.238595	0.594102	-0.748082	-1.03321	-0.037081	-0.169256	-0.104995	-0.370761	0.142268	-0.289348	-0.21603	-0.375883	-0.61595	-0.347438	-0.372183	-0.519126	-0.352765	-0.284533	-0.436283	-0.54885	-0.585985	-0.534608	-0.835421	-0.922562	-0.864257	-1.02357	-0.822115	-0.841268
YAL048C	GEM1	phospholipid homeostasis; cellular homeostasis; mitochondrion inheritance; small GTPase mediated signal transduction; GTP catabolic process; regulation of mitochondrion organization	metal ion binding; hydrolase activity; nucleotide binding; calcium ion binding; GTP binding; GTPase activity	membrane; ERMES complex; integral to membrane; intracellular; mitochondrion; mitochondrial outer membrane	0.0158112	-0.100226	0.711457	0.86066	-0.120832	0.477472	-0.306926	-0.0629724	-0.0965901	0.273267	0.222069	0.241356	0.108447	-0.215167	0.0240618	0.337396	0.311475	0.198144	0.119349	0.968765	0.424024	-0.197585	0.306102	0.390466	0.44434	-0.116636	-0.04772	0.492908
YAL049C	AIM2	biological_process	molecular_function; hydrolase activity	cytoplasm	-0.120419	-0.410439	0.599655	0.413207	0.0902117	0.00334301	-0.0464736	0.113678	0.124152	0.290643	0.0625168	0.0424815	0.0988104	-0.0401886	0.0303606	0.111148	-0.0391034	0.243915	0.108298	0.239225	0.229759	-0.181412	-0.0465614	0.387648	0.297448	0.287846	0.231204	0.444324
YAL051W	OAF1	sporulation resulting in formation of a cellular spore; positive regulation of fatty acid beta-oxidation; cellular response to oleic acid; regulation of transcription, DNA-dependent; positive regulation of chromatin silencing at telomere; transcription, DNA-dependent; transcription from RNA polymerase II promoter; positive regulation of transcription from RNA polymerase II promoter	RNA polymerase II core promoter proximal region sequence-specific DNA binding; sequence-specific DNA binding RNA polymerase II transcription factor activity; metal ion binding; DNA binding; sequence-specific DNA binding; zinc ion binding; RNA polymerase II core promoter proximal region sequence-specific DNA binding transcription factor activity involved in positive regulation of transcription; se…	nucleus	-0.125953	-0.639415	0.195604	0.252327	-0.135913	-0.336909	-0.185785	-0.102771	-0.201832	-0.0293774	0.0662822	-0.200094	-0.20292	-0.135658	0.0124835	0.114448	-0.302699	0.106712	-0.0294138	0.188065	0.0583984	-0.199334	-0.158402	0.0228892	0.179909	-0.0951523	-0.290295	0.0731658
YAL053W	FLC2	transport; protein folding; transmembrane transport; FAD transport; fungal-type cell wall biogenesis	FAD transmembrane transporter activity	membrane; endoplasmic reticulum; integral to membrane; endoplasmic reticulum membrane; cytoplasm	-0.0225651	0.500654	-0.9506	-0.626621	0.22288	0.284991	-0.0802811	-0.0945221	-0.199847	-0.00867233	-0.0964446	0.155083	0.159343	0.0657787	-0.036303	0.0273147	0.182356	0.162032	0.0454806	0.453172	0.0716116	0.244393	0.0565968	0.156335	-0.271434	0.0411092	0.109377	0.171035
YAL054C	ACS1	acetyl-CoA biosynthetic process; acetyl-CoA biosynthetic process from acetate; metabolic process; histone acetylation; acetate fermentation	acetate-CoA ligase activity; acid-ammonia (or amide) ligase activity; ATP binding; AMP binding; nucleotide binding; catalytic activity; ligase activity	intracellular membrane-bounded organelle; nucleus; endoplasmic reticulum; cytosol; integral to membrane; mitochondrion; cytoplasm	0.0839152	-1.29212	3.38013	5.12708	0.222292	-0.455605	-0.295931	0.132664	-0.657084	-0.142448	-0.170146	-0.00627042	-0.10106	-0.228382	-0.087771	0.389238	0.147865	-0.45916	0.272281	0.450578	-0.249421	-0.103443	0.381705	-0.0465846	0.14169	0.462273	0.935022	0.426051
YAL055W	PEX22	peroxisome organization; protein import into peroxisome matrix, receptor recycling; protein targeting to peroxisome	protein anchor	integral to peroxisomal membrane; membrane; integral to membrane; peroxisome; peroxisomal membrane	0.142468	-0.750175	0.841121	0.630965	0.0648292	-0.458706	-0.0493155	-0.059712	-0.101988	0.0500875	0.0185632	0.234809	-0.0087172	0.0457581	0.261715	0.189141	0.0636984	0.184733	0.332843	0.270424	-0.361206	-0.13358	0.165895	0.120625	0.458922	0.49284	0.444533	0.278786
YAL056W	GPB2	pseudohyphal growth; glucose mediated signaling pathway; invasive growth in response to glucose limitation; negative regulation of Ras protein signal transduction; ascospore formation; signal transduction; positive regulation of transcription from RNA polymerase II promoter	cAMP-dependent protein kinase inhibitor activity; signal transducer activity; GTPase activating protein binding	mitochondrion; plasma membrane; cytoplasm	0.169146	-0.0244367	0.390555	0.567815	0.161835	0.420997	0.482984	0.149769	0.109535	0.0786056	0.0400573	0.167533	0.0631682	0.236668	0.261047	0.482077	0.239018	0.181565	0.267699	0.341952	0.27799	0.156982	0.216495	0.157649	0.134795	-0.00324442	0.143229	0.307121
YAL058W	CNE1	protein folding; ER-associated protein catabolic process	calcium ion binding; unfolded protein binding	membrane; endoplasmic reticulum; integral to endoplasmic reticulum membrane; integral to membrane; endoplasmic reticulum membrane	-0.0767199	-0.162065	-0.43903	-0.625669	-0.394377	-0.0236394	0.0186422	-0.275332	0.00723262	-0.00572398	-0.0460802	0.00252796	0.0256974	0.140169	-0.151173	0.139117	0.743428	0.182503	-0.0390541	0.128896	-0.298911	0.0785409	-0.0133582	-0.0153946	-0.0721948	-0.149352	0.199683	0.164708
YAL059W	ECM1	ribosomal large subunit export from nucleus; transport; ribosome biogenesis	molecular_function	nucleus; nucleolus; preribosome, large subunit precursor; cytoplasm	-0.140623	0.308746	-1.202	-1.83943	0.179421	0.674117	0.120907	-0.348132	-0.592777	-0.334771	-0.582688	-1.32686	-0.195462	0.448138	-0.18094	-0.176627	-0.0268838	-0.924604	-1.21741	-2.08412	0.114033	0.732439	0.323327	-0.417287	-1.00914	-0.868092	-0.830567	-1.38947
YAL060W	BDH1	butanediol biosynthetic process; alcohol metabolic process; oxidation-reduction process	metal ion binding; diacetyl reductase ((R)-acetoin forming) activity; (R,R)-butanediol dehydrogenase activity; zinc ion binding; oxidoreductase activity	cytoplasm	0.0829356	-1.37654	2.48862	2.73392	0.158631	-0.438382	0.0197451	0.198185	0.265688	0.40699	0.331476	0.685884	-0.0568322	0.270618	0.383	0.510913	0.501408	0.766413	1.07472	1.26765	-0.0679357	-0.0549488	0.0366071	0.523998	0.766774	0.96561	1.12698	1.09626
YAL061W	BDH2	biological_process; oxidation-reduction process	metal ion binding; oxidoreductase activity, acting on the CH-OH group of donors, NAD or NADP as acceptor; diacetyl reductase ((R)-acetoin forming) activity; zinc ion binding; oxidoreductase activity	nucleus; cytoplasm	0.176984	-1.89688	3.12528	3.46879	0.0582719	-0.668197	0.527628	0.834854	0.472593	0.385165	0.000765849	1.36705	-0.386892	0.242801	1.29927	1.01614	1.99218	2.66694	3.3109	4.30197	-0.306268	0.0434297	2.45748	3.99625	4.74358	6.01308	5.24873	5.73954
YAL062W	GDH3	cellular amino acid metabolic process; glutamate biosynthetic process; oxidation-reduction process; ammonia assimilation cycle	oxidoreductase activity, acting on the CH-NH2 group of donors, NAD or NADP as acceptor; glutamate dehydrogenase (NADP+) activity; oxidoreductase activity	nucleus; mitochondrion	-0.0899201	-0.288337	1.72059	2.36172	-0.93388	0.0887167	-0.737012	0.215071	-0.464303	-0.203143	0.00189064	0.425955	0.346911	1.09675	-0.459581	-0.742389	-0.460903	0.0803478	0.526915	0.438579	-0.751595	-0.0838679	-0.305834	-0.516416	0.319126	-0.586007	0.775183	-0.384285
YAL063C	FLO9	flocculation; cell-substrate adhesion; flocculation via cell wall protein-carbohydrate interaction	mannose binding	membrane; fungal-type cell wall; cell wall; extracellular region; anchored to membrane	-1.19577		0.510332	0.60581	-0.20184	0.967576	0.528039	-1.14494	0.10834	0.543441	0.650685	0.75624	1.20642	0.0185713	-0.0618378	-1.0474	0.188038	0.974504	-0.226874	1.0728	1.26309	-0.706121	0.232473	-0.244274	-0.347015	0.450638	0.307125	0.529256
YAL064W-B	YAL064W-B	biological_process	molecular_function	membrane; integral to membrane	0.450731	0.645157	0.571385	1.26356	-0.166771	0.609852	0.688848	0.134353		0.74783	0.0609926	-0.675503	1.15043	0.709953	0.692585	1.54676	2.03942	1.07835	0.962443	-0.0865074	-0.682852	0.0913223	0.913111	0.0143286	-0.660005	0.500856	0.5818	0.0873404
YAL067C	SEO1	transport; transmembrane transport	transporter activity	membrane; integral to membrane	-0.581763	-1.34163	0.0283167	-0.269717	-0.607515	-0.397565	0.0117939	0.092783	-0.538371	-0.495164	0.100778	0.496719	-0.212428	-0.242585	-0.496896	0.123614	0.06038	-0.469151	-0.0836404	-0.702588	0.254122	-0.339177	-0.353817	0.139091	-0.00343057	1.1824	-0.665649	-2.37554
YAL068C	PAU8	ascospore formation; positive regulation of transcription from RNA polymerase II promoter; response to stress	molecular_function	cellular_component	0.0169983	-0.564244	0.428664	1.35197	-0.486519	-0.0622718	-0.0580753	-0.230531	-0.411972	-0.13249	-0.409292	0.0105263	-0.0786407	0.186862	-0.374974	-0.121583	0.13757	0.232963	-0.0980727	0.488163	0.0657992	-0.169989	-0.0482907	-0.0816079	-0.42369	-0.230244	-0.189001	0.0887223
YAL069W	YAL069W				1.18329	-0.0499261				1.28834		-0.142644		1.44718	0.893495		0.419052	0.811528	0.140042	-0.0866072	-0.166429	-0.388937	-0.284572	0.670674	0.45707	-1.0794	-0.258945	0.17442	-0.482852	1.44313	-0.0539393	-0.686132
YAR002C-A	ERP1	transport; ER to Golgi vesicle-mediated transport; protein transport; vesicle-mediated transport	molecular_function	membrane; ER to Golgi transport vesicle; endoplasmic reticulum; integral to membrane; mitochondrion; endoplasmic reticulum membrane	0.0965522	-0.379736	0.0349488	-0.473434	0.0251771	-0.325992	0.143724	0.33186	-0.23704	-0.292856	-0.152969	0.0157369	-0.314198	-0.0312894	-0.474762	0.109246	0.349318	-0.328802	0.0366914	-0.583093	0.0315704	0.114753	0.452798	0.308044	-0.366475	0.127011	0.195416	0.119435
YAR002W	NUP60	transport; chromatin silencing at silent mating-type cassette; telomere tethering at nuclear periphery; intracellular mRNA localization; NLS-bearing substrate import into nucleus; transcription-dependent tethering of RNA polymerase II gene DNA at nuclear periphery; chromosome organization; mRNA export from nucleus in response to heat stress; mRNA transport; poly(A)+ mRNA export from nucleus; doub…	nucleocytoplasmic transporter activity; structural constituent of nuclear pore; phospholipid binding	membrane; nuclear membrane; nucleus; nuclear pore; nuclear pore central transport channel; nuclear pore nuclear basket; cytosol; integral to membrane	-0.132833	0.237883	-1.07661	-1.15381	0.0188195	0.184775	-0.0623441	-0.170208	-0.123485	-0.165563	0.0644469	-0.284624	0.221521	0.0613086	-0.0357224	-0.262976	-0.359914	-0.299205	-0.267335	0.175134	0.269905	0.118957	-0.0624813	-0.365794	-0.0510841	-0.470231	-0.397463	-0.338505
YAR003W	SWD1	regulation of transcription, DNA-dependent; histone H3-K4 methylation; chromatin silencing at telomere; telomere maintenance	histone methyltransferase activity (H3-K4 specific)	chromosome, telomeric region; nucleus; Set1C/COMPASS complex; chromosome	-0.0154025	0.0348581	0.104476	-0.588969	0.0597063	-0.0345526	0.036351	-0.185424	0.108664	0.0918339	0.0637176	0.312478	-0.00465944	0.219692	0.412977	0.479235	0.52394	0.452155	0.196171	0.243469	0.124937	0.314107	0.0353639	0.0493435	-0.0702233	0.0458671	0.232988	-0.189704
YAR007C	RFA1	establishment of protein localization; telomere maintenance via recombination; DNA repair; DNA replication; DNA unwinding involved in DNA replication; protein ubiquitination; nucleotide-excision repair; reciprocal meiotic recombination; heteroduplex formation; telomere maintenance via telomerase; mitotic recombination; double-strand break repair via homologous recombination	metal ion binding; DNA binding; single-stranded DNA binding; sequence-specific DNA binding; double-stranded DNA binding; nucleic acid binding	nucleus; chromosome, telomeric region; condensed nuclear chromosome; cytosol; cytoplasm; DNA replication factor A complex	0.0355658	0.0261492	-0.434186	-0.527007	-0.110464	-0.375624	-0.224961	-0.0376883	0.165071	0.0198812	0.0244621	0.237922	-0.0141984	-0.265968	-0.274881	-0.341191	-0.280939	-0.051758	-0.3285	0.259394	-0.0520807	-0.113529	-0.482726	-0.113651	0.138501	-0.486316	-0.381003	-0.0316932
YAR008W	SEN34	tRNA splicing, via endonucleolytic cleavage and ligation; tRNA-type intron splice site recognition and cleavage; nucleic acid phosphodiester bond hydrolysis; tRNA processing	hydrolase activity; tRNA-intron endonuclease activity; endonuclease activity; nuclease activity; nucleic acid binding	endomembrane system; membrane; tRNA-intron endonuclease complex; nucleus; mitochondrion; mitochondrial outer membrane	-0.0100594	1.10335	-1.91302	-2.63996	0.161243	-0.0466818	-0.425068	-0.39245	-0.453529	-0.170047	-0.17352	-0.0888548	-0.361741	-0.138958	-0.205868	-0.202989	-0.150382	-0.20819	-0.405971	-0.697572	-0.2881	-0.183056	-0.368464	-0.333226	-0.412805	-0.604023	-0.67505	-1.06144
YAR014C	BUD14	negative regulation of actin filament polymerization; regulation of protein localization; cell division; regulation of transcription, DNA-dependent; cytoskeleton organization; regulation of cell shape during vegetative growth phase; cell cycle	protein phosphatase type 1 regulator activity	nucleus; incipient cellular bud site; cellular bud tip; cellular bud neck; cytoplasm	0.160854	0.0856385	-0.324478	-0.427662	0.0172295	0.344003	0.0521269	-0.106501	-0.166209	-0.164041	-0.197412	-0.22918	0.0342909	0.0961426	-0.260294	-0.198883	-0.27002	-0.293456	-0.395051	-0.309647	0.0186165	0.115869	-0.169748	-0.284022	-0.118352	-0.274336	-0.557149	-0.53474
YAR015W	ADE1	purine nucleotide biosynthetic process; 'de novo' IMP biosynthetic process	ATP binding; phosphoribosylaminoimidazolesuccinocarboxamide synthase activity; nucleotide binding; ligase activity	nucleus; cytoplasm	0.0420749	0.391572	-0.988991	-1.52748	0.378925	-0.429527	0.0842097	0.436351	0.421959	0.461946	0.468775	0.0666777	0.086397	0.110756	0.181049	0.200834	0.0647573	0.0504027	-0.0706977	-0.66443	0.0937697	-0.274185	-0.470333	-0.187356	-0.38538	-0.723175	-1.26813	-1.33776
YAR018C	KIN3	phosphorylation; chromosome segregation; protein phosphorylation	ATP binding; protein serine/threonine kinase activity; nucleotide binding; protein kinase activity; kinase activity; transferase activity; transferase activity, transferring phosphorus-containing groups	cellular_component	-0.217902	0.430791	-1.14638	-1.10281	0.257651	0.414924	0.32684	0.352157	0.124843	0.146186	-0.0890998	-0.0696315	0.072337	0.0206214	0.335058	0.270962	-0.0752637	0.35724	0.116778	-0.202165	0.0280524	0.144488	0.705126	0.28528	0.338314	0.537	0.367621	0.406296
YAR019C	CDC15	meiotic anaphase II; phosphorylation; cytokinesis; protein phosphorylation; mitosis; cell division; regulation of exit from mitosis; cell cycle	ATP binding; protein serine/threonine kinase activity; protein kinase activity; kinase activity; nucleotide binding; transferase activity; transferase activity, transferring phosphorus-containing groups	cytoskeleton; spindle pole; spindle pole body; cellular bud neck; cytoplasm	-0.0402308	-0.876541	0.0416575	1.05355	-0.805509	0.0359735	0.143338	-0.046737	-0.10458	-0.266735	0.427428	-0.199139	0.374006	-0.355302	-0.0611933	-0.0422778	-1.001	0.294824	-0.382548	0.717242	0.12249	-0.115798	0.179745	-0.327126	-0.250569	0.204303	-0.0344869	-0.0322094
YAR020C	PAU7	response to stress; biological_process	molecular_function	cellular_component	0.155897	-0.498655	1.19559	1.61621	0.201458	0.459259	0.269934	0.128568	0.525643	0.309684	0.424083	0.0732071	0.286109	0.113618	0.395193	0.237213	-0.0519508	0.62116	0.186127	0.943216	0.00633546	0.0340478	0.396632	-0.020677	0.443698	0.519703	0.575323	0.625082
YAR023C	YAR023C	biological_process	molecular_function	membrane; cellular_component; integral to membrane	-0.114948	-1.65306	2.15509	2.25986	0.0941329	-0.502858	0.178455	0.521968	-0.629009	0.0937238	0.335527	0.00101553	-0.615978	0.0617904	0.0961819	0.309292	0.541686	0.15974	0.293839	0.0126159	-0.100789	0.666627	0.991863	1.06195	0.19056	0.856134	1.11306	0.730653
YAR027W	UIP3	biological_process	molecular_function	membrane; nuclear membrane; nucleus; nuclear envelope; integral to membrane; plasma membrane	0.16355	-0.677948	0.844475	1.24825	0.119501	-0.31669	-0.168955	0.274443	0.303997	-0.072815	-0.172666	0.328384	-0.0118256	-0.0045006	0.198391	0.670128	0.746081	0.419002	0.559002	0.526599	-0.402878	0.0151667	0.263202	-0.223286	0.11857	0.588228	0.720947	0.716961
YAR028W	YAR028W	biological_process	molecular_function	membrane; fungal-type vacuole membrane; integral to membrane	0.00633756	-0.302443	0.382125	0.372026	-0.278646	-0.0261481	-0.307118	-0.132434	-0.228609	-0.0604047	-0.278747	-0.474496	-0.115245	-0.175375	-0.0919261	0.408557	0.390547	-0.230283	0.217242	-0.665544	0.105047	0.145979	0.315305	-0.226903	-0.151197	0.258007	0.0603532	-0.192033
YAR029W	YAR029W	biological_process	molecular_function	membrane; cytoplasm	0.00559118	-0.210859	-0.33963	0.415052	0.345261	-0.365654	-0.284658	-0.753085	-0.287019	-0.383415	0.0632245	-0.513027	0.126974	-0.293706	-0.642563	0.475027	0.359992	0.51221	0.0752104	-0.590912	-0.0258916	0.110866	-0.0288327	-1.26162	-0.353507	0.144188	0.315017	0.172778
YAR030C	YAR030C				-1.56372		-1.79573	-0.847973	-0.764466	-0.150777	-0.0845941	0.988107	0.466518	0.138858	0.312172	-0.0721123	0.118916	0.260106	0.530507	-0.328719	-0.562836	0.788642	-0.290949	0.162696	-0.404262	-0.208079	0.0584188	-0.731876	0.0020186	0.163853	-0.129865	-0.21797
YAR031W	PRM9	transport; biological_process; vesicle-mediated transport	molecular_function	membrane; endoplasmic reticulum; integral to membrane; plasma membrane	-0.0271515		0.257244		-0.395352	-0.172641	0.421966	-0.490495	0.768916	0.531435	0.636726	-0.252722	0.138623	0.522749	-1.67319	-0.512287		-0.21963	0.639988	-1.27626	-0.427144	1.00548	-0.951274	0.295938	-0.334	-0.229564	-0.15436	-0.588096
YAR033W	MST28	transport; vesicle organization; protein transport; vesicle-mediated transport	molecular_function	membrane; endoplasmic reticulum; cytoplasmic vesicle; Golgi apparatus; COPI-coated vesicle membrane; integral to membrane; plasma membrane; ER to Golgi transport vesicle membrane	-0.0514035	-0.241919	0.334101	0.802134	0.169335	-0.531712	0.459318	0.325062	0.171442	0.459894	0.172286	0.46979	0.241615	-0.0817034	0.304489	0.320539	0.347905	0.150307	0.245946	-0.205277	0.329158	0.619899	0.537703	0.0821768	-0.0504181	0.508541	0.5269	0.308197
YAR035W	YAT1	transport; carnitine metabolic process; fatty acid metabolic process; alcohol metabolic process; lipid metabolic process	transferase activity, transferring acyl groups; carnitine O-acetyltransferase activity; transferase activity	membrane; mitochondrial inner membrane; mitochondrion	0.387662	-0.890714	2.75828	4.48273	0.0415413	-0.399908	-0.233164	-0.5899	-0.353087	0.0764448	-0.0811642	0.000374264	-0.104267	-0.282695	-0.167782	0.155064	-0.142653	-0.113274	0.0790464	0.435756	0.0394304	-0.403805	-0.60364	-0.177702	-0.0946343	-0.434575	-0.383315	-0.518594
YAR042W	SWH1	sterol transport; transport; lipid transport; endocytosis; exocytosis; maintenance of cell polarity	sterol transporter activity; lipid binding; 1-phosphatidylinositol binding; oxysterol binding; phospholipid binding	Golgi trans cisterna; membrane; endoplasmic reticulum; nucleus; nuclear envelope; cytoplasm; Golgi membrane; Golgi apparatus; early endosome; nuclear outer membrane	0.94446	0.562533	0.230327	0.993722	0.988522	0.454215	0.108963	-0.174479	-0.645489		-0.6141	-0.0533522	-0.582335	-0.150222	-0.435052	-0.0387173	1.83499		1.56728	1.31411	0.650024	1.09812	0.965228	0.80731	0.43485	1.69001	2.2785	1.75419
YAR042W	SWH1	sterol transport; transport; lipid transport; endocytosis; exocytosis; maintenance of cell polarity	sterol transporter activity; lipid binding; 1-phosphatidylinositol binding; oxysterol binding; phospholipid binding	Golgi trans cisterna; membrane; endoplasmic reticulum; nucleus; nuclear envelope; cytoplasm; Golgi membrane; Golgi apparatus; early endosome; nuclear outer membrane	-0.0361874	-0.458648	0.77667	0.929605	0.0924378	0.0880474	0.011211	-0.0601018	0.385942	0.183084	0.206716	0.222802	0.140204	0.00726261	0.0248052	-0.0355265	0.0816111	0.127909	0.350526	0.437037	-0.118882	0.0748866	0.17604	0.0830945	0.321549	0.175555	0.209357	0.0270061
YAR050W	FLO1	cellular response to stress; flocculation; flocculation via cell wall protein-carbohydrate interaction	mannose binding	membrane; fungal-type cell wall; cell wall; extracellular region; anchored to membrane; plasma membrane	-0.17784	-0.251464	0.931772	1.73733	-0.806647	0.140721	-0.469064	-0.0656127	0.181796	-0.211347	0.102544	0.0639097	0.577133	-0.919727	0.0686672	0.237257	-0.957506	-0.291382	0.0612754	0.690564	-0.0559842	-0.320995	0.0652145	-0.877423	0.0461297	-0.0800505	0.395862	0.168913
YAR053W	YAR053W				0.582345	-0.133856	0.378111	0.492448	-0.51772	-0.2489	-0.385007	-1.08217	-0.842894	-0.0794729	-0.306296	-0.447597	0.0682967	0.4714	0.691679	-0.115799	0.813425	1.57444	1.1317	0.771155	0.371678	-0.198242	-0.365786	-0.0605724	0.232785	-0.357623	0.493498	-0.533225
YAR060C	YAR060C				0.057367	-0.241084	1.12188	1.24796	0.0134718	0.400238	-0.0577019	0.229392	-0.00765942	0.472158	-0.402839	0.483876	0.0104408	0.441269	0.772718	0.22181	0.146466	0.315886	-0.252555	0.401047	0.53359	0.0285611	0.617228	-0.0679184	0.150953	-0.706843	-0.0348922	0.232177
YAR062W	YAR062W	flocculation; biological_process	molecular_function	cellular_component	0.741289		-1.04237	2.59163	-0.0377958	1.55052	0.242654		0.596603	-0.170095	0.859678	0.470269	0.370423	0.097271	0.458847	0.51755	0.389211	1.38048	0.0463873	1.88906			0.814715		-0.163941	0.0834279	0.452018	0.478834
YAR068W	YAR068W	biological_process	molecular_function	cellular_component	0.102215	0.785061	0.987542	0.252122	-0.682948	0.949136	0.298842	-0.191717	-0.0796341	-0.712276	-0.148731	0.298003	0.442387	0.518486	-0.0473636	0.174184	0.472066	-0.00537369	-0.375116	1.88687	0.342009	0.539209	0.14102	-0.193702	0.570115	2.65217	1.26643	2.32823
YAR071W	PHO11	dephosphorylation; phosphate-containing compound metabolic process	hydrolase activity; acid phosphatase activity; phosphatase activity	extracellular region	0.00708881	0.343648	-0.65657	-0.975344	0.0436678	0.0357654	0.256572	0.3768	0.230006	0.145936	0.162603	-0.0394583	0.208438	0.222915	0.169784	0.494839	0.426004	0.0398106	0.0757567	-0.17855	-0.0746693	0.172838	0.329972	0.0537294	-0.274226	-0.210815	-0.503712	-0.736163
YAR073W	IMD1				-0.331679	0.270469	-1.41306	-1.68086	0.0444553	0.553258	0.395452	0.679092	0.777052	0.408929	0.551159	0.0408035	0.253874	0.262575	0.313121	0.360972	-0.0877189	-0.000612824	-0.32237	-0.331035	0.0727823	0.120849	-0.34331	-0.419167	-0.485204	-0.764163	-1.11177	-1.36625
YAR075W	YAR075W				0.124588	0.486387	-0.912831	-0.997299	-0.183278	0.381742	0.514289	0.494376	0.743659	0.564304	0.710492	0.117543	-0.0443156	0.179883	0.253734	0.70967	-0.0446455	0.25341	0.022273	-0.31316	0.0943765	0.0962668	-0.0631009	0.200536	-0.0407419	-0.716897	-0.943152	-1.63766
YBL001C	ECM15	biological_process	molecular_function	nucleus; cytoplasm	-0.20233	-0.372057	0.754394	1.01406	-0.070348	-0.214242	-0.241296	0.124608	-0.0559122	-0.0392505	-0.169765	0.319454	-0.304222	0.287532	-0.126114	-0.119427	0.782752	0.265068	0.642606	0.625048	-0.695644	-0.207079	0.0199662	-0.110986	-0.190593	0.806315	0.943164	0.9364
YBL002W	HTB2	chromatin assembly or disassembly; nucleosome assembly	DNA binding; protein heterodimerization activity	nucleus; replication fork protection complex; chromosome; nuclear nucleosome; nucleosome	0.0268948	-0.25516	-0.0804559	-0.260979	0.10855	-0.42145	0.0593	-0.0929043	-0.213807	-0.418708	-0.30506	0.0399614	0.0945544	-0.190769	-0.548266	-0.560392	-0.520522	-0.537178	-0.424769	-0.743295	0.471017	-0.0514546	-0.455323	0.304455	-0.00138714	-0.97303	-0.830765	-0.438129
YBL003C	HTA2	chromatin assembly or disassembly; DNA repair; nucleosome assembly; response to DNA damage stimulus	DNA binding; protein heterodimerization activity	nucleus; replication fork protection complex; chromosome; nuclear nucleosome; nucleosome	0.359167	-0.454848	0.880934	0.123777	0.168621	0.34349	0.413954	0.121579	0.0953777	0.0665516	-0.0707668	0.629091	0.207737	0.523098	0.40065	0.0120708	0.613889	0.10751	0.111182	0.0806646	0.535254	0.868962	0.208299	0.545263	0.153688	0.431376	0.156645	-0.508609
YBL004W	UTP20	ribosome biogenesis; endonucleolytic cleavage to generate mature 5'-end of SSU-rRNA from (SSU-rRNA, 5.8S rRNA, LSU-rRNA); endonucleolytic cleavage in ITS1 to separate SSU-rRNA from 5.8S rRNA and LSU-rRNA from tricistronic rRNA transcript (SSU-rRNA, 5.8S rRNA, LSU-rRNA); rRNA processing; endonucleolytic cleavage in 5'-ETS of tricistronic rRNA transcript (SSU-rRNA, 5.8S rRNA, LSU-rRNA)	molecular_function	nucleus; nucleoplasm; 90S preribosome; cytoplasm; nucleolus; small-subunit processome; ribonucleoprotein complex; preribosome, small subunit precursor	-0.0190667	1.22395	-2.29279	-3.27522	0.1164	0.735863	0.823391	0.331043	0.0476344	-0.0369522	0.170118	-0.798855	0.176598	0.521225	0.160818	-0.140503	-0.391338	-0.30659	-0.57162	-0.959736	-0.00974715	0.300123	-0.116595	-0.0767935	-0.299359	-0.804796	-1.26862	-1.2077
YBL005W	PDR3	regulation of transcription, DNA-dependent; positive regulation of cellular response to drug; positive regulation of transcription from RNA polymerase II promoter; transcription, DNA-dependent; transcription from RNA polymerase II promoter	sequence-specific DNA binding RNA polymerase II transcription factor activity; metal ion binding; DNA binding; zinc ion binding; RNA polymerase II core promoter proximal region sequence-specific DNA binding transcription factor activity involved in positive regulation of transcription	nucleus; cytoplasm	0.0977957	0.242026	-0.489663	-0.188262	-0.106625	0.378311	0.329657	0.319366	0.527561	0.0688013	0.347775	0.184293	0.343983	0.279996	0.461011	0.666395	0.653608	0.448372	0.245709	0.941095	-0.0897312	0.230865	0.098133	0.340558	0.286111	-0.0485733	-0.231959	0.197935
YBL006C	LDB7	cell wall mannoprotein biosynthetic process; transcription elongation from RNA polymerase II promoter; regulation of transcription, DNA-dependent; ATP-dependent chromatin remodeling; transcription, DNA-dependent; chromatin modification; nucleosome disassembly	DNA translocase activity	nucleus; RSC complex	0.252688	-0.150614	0.935938	0.860537	0.180854	0.00119016	0.177474	0.256231	-0.0354385	0.181705	-0.183717	0.12019	-0.0431846	0.589402	0.516174	0.524115	0.728007	0.552432	0.317491	-0.0736542	-0.0284649	0.777113	0.956628	0.306716	-0.187866	0.956118	0.880228	0.183499
YBL007C	SLA1	actin cortical patch assembly; fungal-type cell wall organization; endocytosis	actin binding; ubiquitin binding; cytoskeletal protein binding; identical protein binding; protein binding, bridging	membrane; endosome membrane; cytoskeleton; nucleus; cell cortex; mating projection tip; cytoplasm; endosome; actin cortical patch; plasma membrane	0.0282262	0.485874	-0.341122	-0.292412	0.0722113	-0.141042	-0.109926	-0.0823515	0.148842	0.135981	-0.00635707	0.257617	-0.140911	0.00628505	0.0142427	0.140452	0.334821	0.350956	0.392284	0.208483	-0.176109	-0.0859797	0.0699537	0.132936	0.264599	0.52319	0.536516	0.405689
YBL008W	HIR1	transcription elongation from RNA polymerase II promoter; regulation of transcription from RNA polymerase II promoter; regulation of transcription, DNA-dependent; transcription, DNA-dependent; DNA replication-independent nucleosome assembly; chromatin modification	nucleosome binding; DNA binding; transcription corepressor activity; chromatin binding	nucleus; chromosome; HIR complex; chromosome, centromeric region	-0.220471	1.526	-0.927407	-0.794183	0.216249	0.42224	-0.232864	-0.397927	-0.135575	-0.104508	-0.0519172	-0.286259	0.274113	0.0965507	0.071312	0.0817294	-0.189074	-0.254227	-0.31695	0.0693819	-0.393454	0.0858202	-0.309646	-0.253259	-0.578737	-0.672618	-0.462312	-0.799191
YBL009W	ALK2	phosphorylation; meiosis; protein phosphorylation; response to DNA damage stimulus; cell cycle; mitosis	protein serine/threonine kinase activity; ATP binding; protein kinase activity; nucleotide binding; kinase activity; transferase activity; transferase activity, transferring phosphorus-containing groups	cellular_component	-0.42386	0.430706	-1.52345	-2.22238	-0.0754716	0.0130177	-0.151927	-0.184756	-0.0132508	-0.10459	-0.0718172	-0.0644142	-0.103033	0.0330667	-0.284845	-0.118283	0.15066	-0.256256	-0.420147	-0.626915	-0.384938	-0.0972223	-0.457223	-0.388379	-0.547541	-0.477959	-0.663695	-1.02568
YBL010C	YBL010C	biological_process	molecular_function; DNA binding	nucleus; clathrin-coated vesicle	-0.112072	-0.0745324	-0.153168	-0.228571	-0.300775	0.0916627	-0.319431	-0.110297	-0.0605465	0.0689007	0.226079	0.26308	-0.484719	0.04742	-0.15342	-0.0901966	0.104975	-0.00655849	0.0718293	0.175744	-0.214928	-0.421832	-0.265117	-0.358163	-0.0288565	-0.397745	-0.505889	-0.399549
YBL011W	SCT1	phospholipid biosynthetic process; metabolic process; CDP-diacylglycerol biosynthetic process; lipid metabolic process	glycerol-3-phosphate O-acyltransferase activity; transferase activity, transferring acyl groups; glycerone-phosphate O-acyltransferase activity; transferase activity	membrane; endoplasmic reticulum; integral to membrane; endoplasmic reticulum membrane	0.195978	0.556211	0.112012	0.822402	-0.229562	0.610483	0.355809	0.392579	0.277663	0.33827	0.197025	0.233322	0.46684	0.452863	0.265151	-0.0238424	0.655185	0.450411	0.681049	0.925826	0.919601	0.749909	0.960414	0.760119	0.674748	1.0883	1.41272	1.68185
YBL012C	YBL012C				1.14872	-0.285796	0.326996	0.660897	1.02223	0.974634	1.93682	0.925571		1.53429	-0.43416	0.300982	0.458042	1.02012			0.46775			-0.480441	-0.683653		-0.126644	1.24365	1.11141	-0.0768549	1.71325	-0.18129
YBL013W	FMT1	translational initiation; conversion of methionyl-tRNA to N-formyl-methionyl-tRNA; biosynthetic process; translation	hydroxymethyl-, formyl- and related transferase activity; transferase activity; methionyl-tRNA formyltransferase activity	mitochondrion	-0.039595	-1.31931	0.758026	1.90465	1.04128	0.424405	0.914512	1.10733	1.23377	-0.167729	0.443953	-0.969195	1.10957	1.57455	1.84323	0.2601	0.393374	0.651667		0.615451		1.01455		0.993104	0.618493	1.07111	0.843391
YBL014C	RRN6	transcription initiation from RNA polymerase I promoter; regulation of transcription, DNA-dependent; transcription of nuclear large rRNA transcript from RNA polymerase I promoter; transcription, DNA-dependent	RNA polymerase I regulatory region DNA binding; RNA polymerase I CORE element sequence-specific DNA binding transcription factor recruiting transcription factor activity; RNA polymerase I transcription factor binding	nucleus; nucleolus; RNA polymerase I core factor complex; cytoplasm	-0.0413605	1.00173	-0.299094	-0.459902	0.191817	0.944847	-0.265709	-0.494955	0.0224098	-0.0446042	-0.232663	-0.670578	0.080742	-0.187453	-0.386613	-0.289041	-0.0920275	-0.931323	-0.810473	-0.46284	0.173585	0.203228	-0.223859	-0.121489	0.189045	-0.180643	-0.402213	-0.547828
YBL015W	ACH1	acetyl-CoA metabolic process; acetate metabolic process	hydrolase activity; acetate CoA-transferase activity; catalytic activity; acetyl-CoA hydrolase activity	cytosol; mitochondrion; cytoplasm	0.126044	-2.65887	3.87668	4.23822	0.189972	-0.0516444	-0.0867528	-0.256485	-0.0472046	0.169326	-0.0160951	0.437888	0.147774	0.0831385	0.220889	0.242245	0.315318	1.47404	1.23487	1.92699	0.198994	0.313228	0.535885	1.29793	1.6687	2.27805	1.97578	2.51543
YBL016W	FUS3	MAPK cascade; phosphorylation; protein phosphorylation; cell cycle arrest; mitosis; negative regulation of MAPK cascade; invasive growth in response to glucose limitation; cell division; conjugation; negative regulation of transposition, RNA-mediated; cell cycle; pheromone-dependent signal transduction involved in conjugation with cellular fusion	ATP binding; kinase activity; protein serine/threonine kinase activity; protein kinase activity; nucleotide binding; transferase activity; MAP kinase activity; transferase activity, transferring phosphorus-containing groups	nucleus; mating projection tip; mitochondrion; cytoplasm; periplasmic space	-0.155815	0.111957	-0.370466	-0.660811	0.0477111	0.167802	0.00655692	-0.107369	-0.0907771	0.0556053	-0.0209684	-0.196541	-0.180691	-0.160999	-0.041068	-0.353474	-0.707308	-0.427057	-0.422325	-0.481928	0.18712	0.0226789	-0.435782	-0.225474	-0.0893462	-0.768786	-0.381565	-0.295167
YBL017C	PEP1	transport; protein targeting to vacuole; vacuolar transport; protein transport	signal sequence binding; nucleotide binding	membrane; Golgi apparatus; late endosome membrane; integral to membrane	0.1654	0.486854	-0.203756	-0.0116094	-0.226866	0.0775527	-0.194876	0.149884	0.11036	-0.314989	-0.148752	0.0838749	0.185081	0.299044	0.0660854	0.24748	0.471183	-0.104764	-0.101823	0.412289	-0.130573	0.252682	0.0648446	-0.112902	-0.0877273	0.0350941	-0.0683594	0.303789
YBL018C	POP8	intronic box C/D snoRNA processing; mRNA cleavage; rRNA processing; tRNA processing	hydrolase activity; ribonuclease MRP activity; ribonuclease P activity	ribonuclease MRP complex; nucleus; cytosol; nucleolar ribonuclease P complex	0.111033	1.1	-1.73312	-1.73229	0.164696	0.0718892	0.119073	0.299699	-0.344755	-0.142052	-0.429448	-0.401615	-0.194011	0.487021	0.0206483	0.235718	0.643258	-0.274223	-0.354855	-1.31558	-0.211326	0.425702	0.842016	-0.222436	-0.85936	-0.513153	0.136038	-0.865152
YBL019W	APN2	base-excision repair; DNA repair; nucleic acid phosphodiester bond hydrolysis; response to DNA damage stimulus	DNA binding; DNA-(apurinic or apyrimidinic site) lyase activity; nuclease activity; lyase activity; metal ion binding; phosphoric diester hydrolase activity; double-stranded DNA 3'-5' exodeoxyribonuclease activity; zinc ion binding; endonuclease activity	nucleus; intracellular	-0.185199	-0.311525	0.139705	0.225254	0.0246728	-0.822062	-0.265521	-0.209971	-0.32759	-0.326053	-0.0971762	0.0879293	-0.159969	-0.639239	0.016577	0.121868	-0.157348	-0.123076	0.162549	0.112989	0.0628255	-0.589543	-0.266269	-0.021441	-0.213962	0.575033	0.174461	0.299669
YBL020W	RFT1	glycolipid translocation; transport; carbohydrate transport; lipid transport	lipid transporter activity; molecular_function; glycolipid-translocating activity	membrane; endoplasmic reticulum; integral to membrane; endoplasmic reticulum membrane	-0.0832773	0.0436975	0.131316	-0.132186	0.28466	0.0159265	0.346358	0.250602	0.0344124	0.226438	0.0566178	-0.0651591	-0.00381043	0.27606	-0.00184143	0.164787	0.332563	-0.101731	-0.192547	-0.729634	-0.133951	0.258131	0.0751109	-0.107837	-0.395626	-0.217141	-0.26761	-0.541578
YBL021C	HAP3	regulation of transcription, DNA-dependent; regulation of cellular respiration; transcription, DNA-dependent; carbon catabolite activation of transcription from RNA polymerase II promoter	DNA binding; RNA polymerase II core promoter proximal region sequence-specific DNA binding; sequence-specific DNA binding; protein heterodimerization activity; RNA polymerase II core promoter proximal region sequence-specific DNA binding transcription factor activity involved in positive regulation of transcription	nucleus; CCAAT-binding factor complex; intracellular	0.315306	-0.00419088	0.58622	0.283174	0.272482	-0.174684	0.143328	-0.192907	-0.0917687	0.377861	0.121231	0.468053	0.0799016	0.445523	0.400429	0.515457	0.497289	0.500035	0.308557	0.523787	0.333742	0.358547	0.000187968	-0.0188349	0.329494	0.423324	0.3334	0.00734829
YBL022C	PIM1	protein homooligomerization; regulation of mitochondrial DNA replication; protein catabolic process; response to hypoxia; mitochondrion organization; proteolysis; chaperone-mediated protein complex assembly; cellular response to oxidative stress; oxidation-dependent protein catabolic process; ATP catabolic process; misfolded or incompletely synthesized protein catabolic process	serine-type endopeptidase activity; DNA binding; peptidase activity; ATP binding; serine-type peptidase activity; single-stranded DNA binding; mitochondrial light strand promoter anti-sense binding; hydrolase activity; nucleotide binding; nucleoside-triphosphatase activity; sequence-specific DNA binding; ATP-dependent peptidase activity; single-stranded RNA binding; ATPase activity	mitochondrial matrix; mitochondrial nucleoid; mitochondrion	-0.088445	0.278774	-0.324716	-0.421706	0.233347	-0.328888	0.277869	0.348447	0.569569	0.592339	0.370552	0.415551	-0.382944	-0.0628848	0.212426	0.0731269	-0.0650128	0.0170872	0.128583	-0.230482	-0.201303	-0.416857	-0.140038	0.126923	0.437112	0.609396	-0.067538	-0.0196832
YBL023C	MCM2	double-strand break repair via break-induced replication; DNA replication; DNA replication initiation; DNA strand elongation involved in DNA replication; DNA duplex unwinding; S phase of mitotic cell cycle; pre-replicative complex assembly involved in nuclear cell cycle DNA replication; response to DNA damage stimulus; cell cycle	DNA replication origin binding; DNA binding; ATP binding; helicase activity; metal ion binding; single-stranded DNA binding; hydrolase activity; chromatin binding; nucleotide binding; DNA helicase activity	DNA replication preinitiation complex; nucleus; replication fork protection complex; nuclear pre-replicative complex; MCM complex; cytoplasm	0.166427	0.811279	-0.794878	-1.06863	-0.0482079	0.309668	0.00774957	0.192571	0.184959	0.12786	0.110429	0.0104391	0.145825	0.126076	0.417246	0.299449	-0.385421	0.253485	0.0323473	0.0580519	-0.304067	0.0332029	-0.105527	-0.319393	-0.309566	-0.00756647	-0.205688	-0.441953
YBL024W	NCL1	tRNA methylation; methylation; tRNA processing	tRNA (cytosine-5-)-methyltransferase activity; RNA binding; methyltransferase activity; transferase activity; tRNA binding	nucleus; nucleolus	-0.100482	0.441375	-1.7168	-2.55331	0.188004	0.553777	0.291915	0.0976261	0.143832	-0.0427059	0.0596219	-0.436147	0.0960259	0.0909708	0.0574223	-0.0643317	-0.298731	-0.371704	-0.512797	-0.575183	0.212471	-0.0174044	-0.259218	-0.204469	-0.175462	-0.733736	-0.83766	-0.597893
YBL025W	RRN10	regulation of transcription, DNA-dependent; transcription of nuclear large rRNA transcript from RNA polymerase I promoter; transcription, DNA-dependent	RNA polymerase I upstream control element sequence-specific DNA binding transcription factor activity; RNA polymerase I upstream control element sequence-specific DNA binding	nucleus; nucleolus; RNA polymerase I upstream activating factor complex	0.15754	0.91562	-0.21571	-0.207623	0.290713	0.70027	0.362685	0.00626343	-0.0420146	-0.161479	-0.232587	-0.0786025	0.0851958	0.127827	0.37183	0.899531	0.337897	-0.11068	-0.862074	-0.187789	-0.163332	0.415554	0.108334	-0.0449929	-0.448443	0.223258	-0.0352616	-0.178621
YBL026W	LSM2	mRNA processing; mRNA splicing, via spliceosome; RNA splicing; rRNA processing; tRNA processing	RNA binding	nucleus; small nucleolar ribonucleoprotein complex; cytoplasmic mRNA processing body; cytoplasm; U4/U6 x U5 tri-snRNP complex; spliceosomal complex; nucleolus; U6 snRNP; ribonucleoprotein complex	0.182639	-0.0329041	0.248471	0.0934477	-0.0462383	-0.334076	-0.237317	0.0291177	-0.486069	-0.417882	-0.515195	-0.454473	0.0600685	0.150915	-0.0754025	-0.187119	0.271344	-0.378283	-0.23168	-0.491301	0.251559	0.59586	1.17533	0.437877	0.0047303	0.727504	1.03093	0.669461
YBL027W	RPL19B	cytoplasmic translation; translation	structural constituent of ribosome	ribosome; ribonucleoprotein complex; cytosolic large ribosomal subunit; intracellular; cytoplasm	-0.16861	-0.556348	-0.126057	-0.590783	0.148448	-0.290638	-0.100883	-0.0905453	0.0970336	0.157058	0.209472	-0.182336	-0.0667676	-0.0754411	-0.258211	-0.364396	0.0729485	-0.11502	0.0568683	-0.5881	0.641609	0.18723	0.0257135	0.582685	0.557998	0.210583	0.286108	0.257826
YBL028C	YBL028C	biological_process	molecular_function	ribosome; nucleus; nucleolus; preribosome, large subunit precursor	0.0706645	0.721423	-2.4133	-3.04631	0.226124	0.616081	-0.205318	-0.1359	-0.582083	-0.214259	-0.585078	-1.34926	-0.0553495	0.346517	0.0746319	0.0844135	0.422341	-0.577711	-0.605405	-1.64523	-0.397584	0.687031	0.829866	-0.185942	-0.468874	0.0550603	-0.0265126	-1.02836
YBL029C-A	YBL029C-A	biological_process	molecular_function	membrane; plasma membrane	0.154327	-0.780441	1.58871	1.73718	0.0865058	-0.592666	-0.534892	-0.242666	-0.575745	-0.575723	-0.195053	-0.0777428	-0.162019	-0.2854	-0.386725	-0.735585	0.109079	0.34059	0.446444	0.204538	0.435704	-0.27909	0.0481654	0.000296141	0.149146	0.407038	1.27756	1.27931
YBL029W	YBL029W	biological_process	molecular_function	nucleus; cytoplasm	0.1683		1.43727	0.0558394	-0.0336125	-0.678832	-0.350301	-0.901107	-0.927953	-0.791081	-0.0785054	-0.668356	0.26839	-0.571832	-0.641535	-0.61521	-0.181653	-0.348934		0.134875	1.02798	0.220367	0.452572	-0.19635	-1.62188	-0.82727	-0.0777278
YBL030C	PET9	transport; transmembrane transport; ATP transport; heme transport; aerobic respiration; apoptotic process; mitochondrial transport; anaerobic respiration; ADP transport	ATP:ADP antiporter activity; transporter activity	membrane; mitochondrial inner membrane; integral to membrane; mitochondrion	0.248183	-0.656282	1.30837	1.4792	0.309195	0.178545	0.192507	0.296453	0.328223	0.264668	0.342065	0.602686	0.393186	0.296157	0.111379	0.258607	0.0947397	0.196852	0.315704	0.677128	0.546621	0.36236	-0.0681524	0.377531	0.365846	0.254322	0.00437006	0.63441
YBL031W	SHE1	chromosome segregation; cell division; mitotic spindle elongation; cell cycle; mitosis	microtubule binding	cytoskeleton; nuclear microtubule; astral microtubule; microtubule cytoskeleton; spindle; cytoplasm; cellular bud neck	-0.436247	-0.0171539	-0.87618	-1.52026	0.0861993	-0.141665	-0.10004	-0.138709	-0.092085	-0.00388707	0.119106	0.177523	-0.349506	-0.591029	-0.128478	-0.27225	-0.103618	0.115406	0.0147427	-0.13923	-0.497286	-0.41825	-0.187986	-0.0623084	0.179502	-0.287064	-0.109166	0.0864087
YBL032W	HEK2	transport; intracellular mRNA localization; telomere maintenance via telomerase; regulation of translation; mRNA stabilization; chromatin modification; mRNA transport	RNA binding; mRNA binding	nucleus; chromosome, telomeric region; nuclear chromosome, telomeric region; chromosome; cytoplasmic mRNA processing body; cytoplasm	0.0151052	0.0826389	-0.409452	-0.690371	0.0502157	0.306093	0.0216934	0.105401	0.0243735	-0.222537	-0.195675	-0.168735	0.228236	0.0220141	-0.122891	-0.0392288	-0.343808	-0.352493	-0.500853	0.148883	-0.0478093	-0.0675047	-0.385641	-0.145002	-0.112985	-0.698633	-0.731135	-0.530377
YBL033C	RIB1	riboflavin biosynthetic process	metal ion binding; hydrolase activity; nucleotide binding; cyclohydrolase activity; GTP cyclohydrolase II activity; GTP binding	nucleus; cytoplasm	0.0231652	-0.974875	1.70711	1.45303	0.0253027	-0.301711	-0.0612443	-0.209876	-0.426547	-0.149702	-0.139727	0.0233439	0.307853	-0.379889	-0.397075	-0.476725	-0.675117	-0.638617	-0.386485	-0.226913	-0.153006	-0.786626	-0.495575	-0.627069	-0.579713	-1.35555	-0.572568	-0.412312
YBL034C	STU1	cell division; cell cycle; microtubule nucleation; mitosis	structural constituent of cytoskeleton	cytoskeleton; nucleus; microtubule; spindle pole body; chromosome; cytoplasm; chromosome, centromeric region; spindle; condensed chromosome kinetochore; kinetochore	-0.58578	0.257867	-1.234	-0.974473	-0.304213	-0.274654	-0.196254	-0.281946	-0.259548	-0.438495	-0.128853	-0.160652	0.0232415	-0.0707766	-0.36889	-0.274012	-0.300782	-0.311588	-0.125511	0.0675562	-0.187809	-0.111584	-0.434896	-0.263354	-0.135469	-0.329094	-0.5369	-0.133733
YBL035C	POL12	telomere capping; lagging strand elongation; DNA replication; DNA replication initiation	DNA binding; DNA-directed DNA polymerase activity	nucleus; nuclear envelope; alpha DNA polymerase:primase complex	-0.354995	0.607466	-1.86011	-2.2797	-0.206203	-0.297472	-0.421742	-0.362799	-0.0425789	-0.0227186	0.0305947	-0.0375636	-0.126252	-0.614718	-0.534046	-0.486214	-0.475818	-0.317279	-0.324593	-0.57654	-0.179441	-0.60108	-0.714855	-0.638912	-0.301434	-1.02984	-1.28883	-0.976111
YBL036C	YBL036C	biological_process	pyridoxal phosphate binding	cellular_component	-0.203594	0.383125	-0.748992	-0.77671	0.102202	-0.194871	-0.057865	-0.163662	0.0591387	0.159534	-0.0719812	-0.142151	-0.229856	-0.178807	-0.131265	-0.183791	0.0869739	-0.0709862	-0.16465	-0.378407	0.0208597	-0.015532	-0.20991	-0.145415	-0.0347844	-0.648202	-0.228897	-0.187811
YBL037W	APL3	intracellular protein transport; protein transport; vesicle-mediated transport	molecular_function; protein transporter activity	membrane; membrane coat; AP-2 adaptor complex; coated pit; clathrin adaptor complex; cellular bud neck; plasma membrane	0.418406	0.241161	-0.496512	-0.626513	0.265462	0.331844	0.257896	0.0721517	0.163911	0.0992716	0.262053	0.312458	0.38727	0.0328833	0.315111	0.209626	0.106435	0.0952083	0.285022	0.526917	0.342378	0.329621	-0.0926235	0.18891	0.280961	-0.576115	-0.0808999	-0.0344204
YBL038W	MRPL16	mitochondrial translation; translation	peptidyltransferase activity; structural constituent of ribosome; rRNA binding	ribosome; mitochondrial large ribosomal subunit; ribonucleoprotein complex; intracellular; mitochondrion	0.082657	0.0473054	0.137788	-0.169352	0.399808	-0.165362	0.0919828	0.0405235	-0.0883945	0.105533	0.0143286	0.113548	-0.00870715	0.271311	0.268259	0.322863	0.0799891	-0.0247297	0.0689951	0.25915	-0.0796371	-0.0463642	-0.148396	-0.126297	-0.120515	0.182299	-0.0860771	-0.284532
YBL039C	URA7	phospholipid biosynthetic process; glutamine metabolic process; pyrimidine nucleotide biosynthetic process; CTP biosynthetic process; 'de novo' CTP biosynthetic process; pyrimidine nucleobase biosynthetic process	ATP binding; nucleotide binding; ligase activity; CTP synthase activity	cytoplasm; cytoophidium	0.0281874	0.886641	-1.96486	-2.91729	0.0331575	0.606996	0.396339	-0.0649054	0.0109552	-0.174489	-0.156153	-0.966507	0.179591	0.114437	-0.00744619	-0.152534	-0.280902	-0.42725	-0.853542	-1.35353	0.300656	0.202456	-0.340783	-0.444663	-0.500218	-1.08864	-1.47411	-1.52347
YBL040C	ERD2	transport; ER to Golgi vesicle-mediated transport; protein transport; protein retention in ER lumen; vesicle-mediated transport	ER retention sequence binding; HDEL sequence binding	membrane; endoplasmic reticulum; integral to endoplasmic reticulum membrane; integral to membrane; endoplasmic reticulum membrane	0.556397	-0.302811	1.00636	0.656651	0.623265	-0.0551529	0.0885891	0.297752	0.0633334	0.346901	-0.157807	0.397959	0.114647	0.513009	0.788659	0.766666	1.04026	0.299127	0.477232	-0.106969	-0.0782702	0.666631	1.03298	0.223039	-0.375049	0.882672	0.945041	-0.0285216
YBL041W	PRE7	proteolysis involved in cellular protein catabolic process; proteolysis; proteasomal ubiquitin-dependent protein catabolic process; proteasomal ubiquitin-independent protein catabolic process	endopeptidase activity; molecular_function; peptidase activity; hydrolase activity; threonine-type endopeptidase activity	nucleus; proteasome complex; proteasome core complex, beta-subunit complex; endoplasmic reticulum membrane; cytoplasm; proteasome core complex; proteasome storage granule	0.0594742	-0.376104	0.399284	0.386134	0.344446	0.0934216	0.304763	0.270517	0.396741	0.441198	0.398992	0.298787	0.121729	0.00793526	0.280658	0.166966	0.333116	0.264749	0.308229	0.100537	0.376682	0.0542097	0.331038	0.576708	0.32438	0.615784	0.263644	0.263685
YBL042C	FUI1	transport; transmembrane transport; nucleobase transport; uridine transport	nucleobase transmembrane transporter activity; uridine transmembrane transporter activity; transporter activity	membrane; integral to membrane; plasma membrane	0.185646	0.748683	-1.25753	-0.999696	0.253876	0.574034	-0.14568	0.0270624	-0.359532	-0.440065	-0.67621	-0.833542	0.0443981	0.184261	-0.258909	-0.329203	-0.54832	-1.31082	-1.36948	-1.3176	0.245585	0.757234	0.334129	-0.242725	-0.898342	-1.32352	-0.915001	-0.963555
YBL043W	ECM13	biological_process	molecular_function	cellular_component	-0.29923	-0.156218	-1.01191	-0.917746	-0.772185	0.213787	0.526206	0.399515	-0.734329	-0.724804	-0.56341	0.296148	-0.814922	-2.46607	-1.51933	-1.84402	-1.47439	-2.58814	-3.31644	-2.3477	-0.671694	-0.865453	-1.60872		-2.7892		-1.91852	-1.3785
YBL044W	YBL044W	biological_process	molecular_function	cellular_component	0.0764157	-0.167324	1.17288	0.872675	0.911081	0.588302		-0.810402	-1.28669	1.41924	-0.0619608	-0.342604	-0.868017		0.518139	0.596515		0.728505	0.643701	0.161496		0.876089	0.923445	0.297569	-1.18035	-0.395976	0.63204	-1.22028
YBL045C	COR1	electron transport chain; aerobic respiration	metal ion binding; ubiquinol-cytochrome-c reductase activity; catalytic activity	membrane; mitochondrial inner membrane; integral to membrane; mitochondrial respiratory chain complex III; mitochondrion; respiratory chain	0.0541989	-1.10031	1.7844	2.04888	0.0868258	-0.244284	-0.318353	-0.308827	0.0524898	-0.22531	-0.0840105	0.302411	0.0834998	0.113022	-0.328001	-0.304463	-0.558907	-0.0949687	0.209204	0.527776	-0.203408	-0.06863	-0.264633	-0.420964	-0.151578	-0.487379	-0.241547	0.133069
YBL046W	PSY4	protein dephosphorylation; negative regulation of DNA damage checkpoint	protein phosphatase regulator activity	nucleus; cytoplasm	0.258175	-0.00956181	0.108435	-0.146016	0.253283	0.0567883	0.142817	-0.0299944	0.221672	0.0063194	0.131784	0.0919804	0.0147377	0.0269232	0.073747	-0.125686	-0.0999819	-0.0115118	0.0343959	-0.136928	-0.17682	-0.120304	-0.419933	-0.0557817	-0.0939009	-0.088021	-0.248842	-0.474663
YBL047C	EDE1	endocytosis; endoplasmic reticulum unfolded protein response	ubiquitin binding; calcium ion binding	actin cortical patch; mating projection tip; cellular bud tip; cytoplasm; cellular bud neck	-0.00385822	-0.0116329	-0.148598	0.024044	-0.127738	0.331816	0.0222771	-0.0900742	0.305859	0.0552253	0.211126	0.223039	0.091486	-0.00944755	0.0761975	0.0495539	0.356157	0.298959	0.56229	1.11206	0.24564	0.266087	0.390685	0.441552	0.674964	0.800533	0.994378	1.07844
YBL048W	RRT1				0.152118	-1.67685	2.48508	3.05049	-0.086959	-0.471454	0.277462	-0.181484	-0.30631	0.835425	0.735619	0.607863	-0.346724	0.737449	-0.43332	0.909125	0.345563	0.868632	0.377728	0.833258	-0.990168	-0.260712	0.174746	1.58686	0.887536	1.66264	2.02468	2.49093
YBL049W	MOH1	biological_process	molecular_function	cellular_component	-1.57563	-1.1686	2.37527	3.54738			-0.0114691	1.32847	-0.227126	0.302772	0.152707	0.129639			1.40205	-0.17802	0.312494	-0.141263	0.951846		1.02545	1.56807	0.580208	2.04653		0.680019	1.31066	1.32567
YBL050W	SEC17	transport; SNARE complex disassembly; vacuole fusion, non-autophagic; vesicle-mediated transport; intracellular protein transport; vesicle fusion with Golgi apparatus; autophagy; protein transport	ATPase activator activity; soluble NSF attachment protein activity	membrane; fungal-type vacuole membrane; cytosol; extrinsic to membrane; SNARE complex	-0.151675	-0.473929	0.450349	0.479296	0.113157	-0.346818	-0.00702489	0.0166476	0.210615	0.286513	0.107065	0.222763	-0.220177	0.06073	0.154364	0.255926	0.219495	0.0199812	0.256472	-0.0917075	-0.279683	-0.21469	-0.0494092	0.0698034	-0.122413	0.294557	0.295575	-0.0288405
YBL051C	PIN4	DNA damage checkpoint; G2/M transition of mitotic cell cycle	molecular_function; RNA binding; nucleotide binding; nucleic acid binding	cytoplasm	0.129984	-0.0297874	-0.239936	-0.0894809	0.139634	0.23569	0.010845	-0.105304	0.249902	-0.0423828	0.173456	0.0823094	0.0914175	-0.0952058	-0.0781249	-0.281656	-0.265979	-0.149008	0.093253	0.816506	0.0835146	-0.286854	-0.162314	-0.318108	-0.174695	-0.329095	-0.337074	-0.108484
YBL052C	SAS3	chromatin silencing at silent mating-type cassette; regulation of transcription, DNA-dependent; histone acetylation; transcription, DNA-dependent; chromatin silencing at telomere; chromatin modification	metal ion binding; transferase activity, transferring acyl groups; histone acetyltransferase activity; transferase activity, transferring acyl groups other than amino-acyl groups; transferase activity	nucleus; NuA3 histone acetyltransferase complex	0.386951	1.02734	-1.19588	-1.95173	0.159337	0.278661	0.06531	0.208739	0.0244323	-0.160182	-0.104026	-0.070752	0.376973	0.145315	0.171754	0.159287	-0.0588969	-0.126629	-0.0338013	-0.0968281	0.0900976	0.0577804	0.0567001	0.0750955	-0.0298238	-0.0571587	-0.131698	-0.39246
YBL054W	TOD6	regulation of transcription from RNA polymerase II promoter	DNA binding; chromatin binding; sequence-specific DNA binding	nucleus; Rpd3L complex; Rpd3L-Expanded complex; cytoplasm	-0.1344	0.72602	-1.85024	-2.80215	-0.171001	1.45208	-0.558951	-0.979326	-0.654711	-0.665015	-0.574384	-1.76644	0.0400445	-0.503129	-1.06961	-0.889433	-1.53206	-1.90353	-2.0375	-2.47572	-0.152907	0.102897	-1.38908	-1.13759	-1.33866	-1.91694	-2.33826	-2.08617
YBL055C	YBL055C	cellular response to oxidative stress; apoptotic DNA fragmentation	metal ion binding; hydrolase activity; endodeoxyribonuclease activity, producing 5'-phosphomonoesters; 3'-5'-exodeoxyribonuclease activity; endonuclease activity; nuclease activity	cytoplasm	-0.184196	0.064794	-0.653851	-1.00573	-0.391743	0.65175	0.487046	0.292668	-0.170472	-0.19443	-0.237812	-0.806114	0.20245	0.321179	0.132253	0.0321351	-0.343739	-0.712115	-0.748043	-1.29687	-0.0501533	0.49096	-0.0795548	0.214749	-0.587672	-0.861616	-0.742103	-0.856924
YBL056W	PTC3	protein dephosphorylation; inactivation of MAPK activity involved in osmosensory signaling pathway; regulation of cyclin-dependent protein serine/threonine kinase activity	metal ion binding; hydrolase activity; phosphoprotein phosphatase activity; catalytic activity; protein serine/threonine phosphatase activity	nucleus; cytoplasm	0.346376	-0.294415	0.730333	0.828998	0.169783	-0.0629222	0.0125286	0.0129047	0.285642	0.250461	0.0948908	0.231606	0.0258535	0.254674	0.256764	0.0820835	0.277952	0.226266	0.14665	0.152219	0.46313	0.520807	0.343197	0.412906	0.482125	0.753805	0.681041	0.687623
YBL057C	PTH2	negative regulation of proteasomal ubiquitin-dependent protein catabolic process	hydrolase activity; aminoacyl-tRNA hydrolase activity	mitochondrion; mitochondrial outer membrane; cytoplasm	0.00058498	-0.262808	0.336423	-0.0339732	0.151114	-0.109798	0.19275	0.350041	-0.0836608	0.0687987	-0.160621	-0.0768387	-0.237675	0.390158	0.293698	0.180756	0.250439	-0.128656	0.0586674	-0.615979	0.135507	0.412743	0.567131	0.540903	0.117597	0.51568	0.467168	0.133622
YBL058W	SHP1	glycogen metabolic process; ascospore formation; proteasomal ubiquitin-dependent protein catabolic process; ER-associated protein catabolic process; autophagic vacuole assembly; piecemeal microautophagy of nucleus; sister chromatid biorientation	protein phosphatase type 1 regulator activity	nucleus; cytoplasm	-0.0872179	0.404339	-0.651889	-0.683724	-0.00460457	-0.18287	-0.100761	0.0996241	0.492823	0.318024	0.359399	0.225728	-0.029995	0.132109	0.368839	0.35036	0.350656	0.466479	0.551968	0.696014	-0.0778175	0.0260988	0.0836599	0.429429	0.511906	0.48064	0.14622	0.299685
YBL059C-A	CMC2	mitochondrial respiratory chain complex assembly	molecular_function; metal ion binding	membrane; nucleus; mitochondrial intermembrane space; mitochondrial inner membrane; mitochondrion; cytoplasm	-0.166332	-0.16423	0.615769	0.684734	0.0171531	-0.338792	-0.270478	-0.0673918	-0.6554	-0.45429	-0.479484	-0.110228	-0.368534	0.00479234	0.13732	0.137325	-0.185542	-0.379436	-0.0631368	-0.168621	-0.0347076	0.151748	0.741822	0.430931	0.177098	0.76383	1.07028	0.605279
YBL059W	YBL059W	biological_process	molecular_function	membrane; integral to membrane; mitochondrion	-0.040964	-0.441557	0.863735	0.919303	0.253151	-0.380517	0.110832	0.196083	-0.315847	0.070126	-0.0169035	0.106947	-0.273179	-0.00772682	0.0816939	-0.0596338	-0.0241533	0.180328	0.127097	-0.435484	-0.80537	-0.658499	-0.382091	-0.388853	-0.566213	-0.351597	-0.154768	-0.396749
YBL060W	YEL1	regulation of ARF protein signal transduction; positive regulation of phosphatidylinositol biosynthetic process; protein localization; actin cortical patch localization	guanyl-nucleotide exchange factor activity; ARF guanyl-nucleotide exchange factor activity; phospholipid binding	membrane; cellular bud tip; plasma membrane; cytoplasm; cellular bud neck	-0.17864	-0.0260807	-0.622782	-1.07076	-0.0158718	0.0349859	-0.367805	-0.0860016	-0.00658976	-0.0834879	-0.0590176	-0.34441	-0.30637	-0.260404	-0.243001	-0.330083	-0.351415	-0.453792	-0.123535	-0.451335	0.0454534	-0.285986	-0.226163	-0.521765	-0.404259	-0.824891	-0.72941	-0.83152
YBL061C	SKT5	fungal-type cell wall chitin biosynthetic process	enzyme activator activity	membrane; incipient cellular bud site; cellular bud neck; plasma membrane; cellular bud neck septin ring	-0.180559	0.677374	-0.743127	-0.742017	-0.11026	0.211908	-0.157598	-0.552603	0.0488011	-0.110888	-0.0483736	-0.184673	-0.205564	-0.221164	-0.523799	-0.531951	-0.537581	-0.518465	-0.891235	-0.838168	-0.0821371	-0.119861	-0.608388	-0.744509	-0.527344	-1.30327	-1.10083	-0.843347
YBL063W	KIP1	microtubule-based movement; microtubule depolymerization; spindle pole body separation; mitosis; mitotic anaphase B; mitotic sister chromatid segregation; cell division; plasmid partitioning; cell cycle	ATP binding; nucleotide binding; microtubule motor activity; structural constituent of cytoskeleton; microtubule binding	cytoskeleton; nucleus; microtubule; spindle pole body; spindle; cytoplasm; spindle microtubule; kinesin complex	0.148328	0.778542	-1.10712	-0.778461	-0.171658	-0.108309	-0.132325	0.156881	-0.0356138	-0.355425	-0.0865982	-0.0675496	-0.168732	0.016859	-0.116047	0.0556679	-0.366068	-0.274789	-0.229837	-0.275578	-0.210952	-0.259856	-0.246818	-0.0723505	-0.398044	-0.488459	-0.699424	-0.624455
YBL064C	PRX1	response to cadmium ion; cellular response to oxidative stress; oxidation-reduction process; cell redox homeostasis	antioxidant activity; peroxidase activity; thioredoxin peroxidase activity; peroxiredoxin activity; oxidoreductase activity	mitochondrion	-0.186944	-1.83359	2.22041	2.53383	-0.0328163	-0.808773	0.0632023	0.322644	0.271132	0.519654	0.650975	1.28016	-0.0596224	0.258084	-0.0322637	0.107988	0.524258	0.885072	1.32316	1.51935	0.0111769	-0.193046	0.372655	1.12708	1.186	1.63369	1.54296	2.09727
YBL065W	YBL065W				-0.359114	-0.455522	4.32361	4.59328	1.05412	1.69168	0.0811887				0.335041	-0.390049	0.0395658	1.54208	2.46852	1.07217	0.386981	1.67089	-0.372048	0.485889	-0.310333	-0.260458	1.72891	0.466652	0.699837	0.362507	1.40415	-0.500934
YBL066C	SEF1	regulation of transcription from RNA polymerase II promoter; sporulation resulting in formation of a cellular spore; regulation of transcription, DNA-dependent; transcription, DNA-dependent; biological_process; transcription from RNA polymerase II promoter	molecular_function; sequence-specific DNA binding RNA polymerase II transcription factor activity; metal ion binding; DNA binding; zinc ion binding	cellular_component; nucleus	0.27342		1.48215	1.8365	0.161744	1.13926	-0.0475845	-0.170783	0.155089	0.431097	-0.0130473	0.344206	0.263752	-0.150619	0.492553	0.563049	-0.103446	-0.0127037	0.749265	0.99298	0.820465	-0.253721	-0.183518	0.207935	0.633985	0.0638717	-0.0600021	0.35171
YBL067C	UBP13	ubiquitin-dependent protein catabolic process; proteolysis; biological_process	ubiquitin-specific protease activity; peptidase activity; cysteine-type peptidase activity; hydrolase activity; ubiquitin thiolesterase activity	cellular_component	0.293299	1.15627	-0.578797	-0.195414	0.0628894	0.407823	0.213167	-0.0592361	0.281416	0.0820107	0.0569689	0.00561945	0.0483589	0.410447	0.419432	0.279125	0.319348	0.158439	-0.0498525	0.0684334	-0.194528	0.381795	-0.00971554	-0.0799074	0.0501718	0.0488186	0.0809523	-0.202882
YBL068W	PRS4	phosphorylation; nucleotide biosynthetic process; fungal-type cell wall organization; ribonucleoside monophosphate biosynthetic process; 5-phosphoribose 1-diphosphate biosynthetic process; cellular biosynthetic process	magnesium ion binding; metal ion binding; ribose phosphate diphosphokinase activity; ATP binding; kinase activity; nucleotide binding; transferase activity	cytoplasm	0.221121	0.445187	-0.46815	-0.932279	0.273403	0.494481	0.270259	-0.000966172	-0.290065	0.0872107	-0.0154197	-0.561542	-0.0479255	0.110118	-0.132881	0.0622398	-0.603744	-0.413664	-0.527034	-1.14705	0.355239	0.16252	-0.0381712	-0.0265306	-0.271314	-0.395046	-0.717926	-0.600524
YBL069W	AST1	protein transport into membrane raft; protein targeting to membrane; oxidation-reduction process	molecular_function; zinc ion binding; oxidoreductase activity	membrane; membrane raft; late endosome; Golgi apparatus; plasma membrane	0.136445	0.383865	-0.793439	-1.49572	-0.0824153	0.0490622	-0.146685	-0.349546	-0.149095	-0.191999	-0.0843421	-0.171252	0.0778184	-0.363263	-0.158275	0.477042	-0.130342	-0.177258	-0.552982	0.349849	0.733181	0.39673	-0.340209	0.468858	0.442689	-0.450011	-0.131978	0.483081
YBL071C	YBL071C				-0.830825		-0.386262	0.0511091		0.469135	0.657062	0.207119		-0.0722822	-1.14071	0.0663686	-1.37308	0.0577229	-1.35006	1.02165	0.0477212	0.324491	0.0542621	0.269316		-0.0583468	-0.271651	1.37689	1.04769	0.747051	0.612049	-0.0948468
YBL071W-A	KTI11	tRNA wobble uridine modification; peptidyl-diphthamide biosynthetic process from peptidyl-histidine	electron carrier activity; metal ion binding; iron ion binding; zinc ion binding	nucleus; cytoplasm	0.0791855		-0.86698	-0.346794	-0.303335	-0.133651	-0.637542	-0.0251715	-0.675263	-0.9058	-0.41256	-1.42258	0.0018128	-0.855914	-0.774866	-0.951473	-1.0538	-1.09989	-1.82287	-1.77241	0.176125	-0.322541	-0.264902	-0.110527	-0.296301	-0.357282	-1.12301	-0.277075
YBL072C	RPS8A	maturation of SSU-rRNA from tricistronic rRNA transcript (SSU-rRNA, 5.8S rRNA, LSU-rRNA); cytoplasmic translation; translation; translational elongation	structural constituent of ribosome	ribosome; 90S preribosome; ribonucleoprotein complex; intracellular; cytosolic small ribosomal subunit; cytoplasm	0.210185	-1.16297	1.07846	0.494464	0.348251	-0.0712249	0.0825684	-0.0741538	0.217342	0.423426	0.0996075	0.243413	-0.0680783	-0.0245198	-0.0450345	-0.716451	0.11582	-0.0791843	0.0137386	-0.520915	-0.198435	-0.151664	-0.441606	0.0591657	-0.0204439	0.0428758	-0.047377	-0.582605
YBL075C	SSA3	protein folding; SRP-dependent cotranslational protein targeting to membrane, translocation; response to stress	ATP binding; nucleotide binding; unfolded protein binding; ATPase activity	cytosol; cytoplasm	0.0430135	0.0259812	0.961859	1.51616	-0.145996	-0.165487	-0.335263	-0.213765	-0.0370056	0.0837945	0.0832285	-0.0924789	0.289111	0.0331014	0.00515794	0.260527	-0.393685	-0.0692582	-0.429427	0.224161	0.322446	-0.0239173	0.181428	0.275037	0.340929	0.0577303	0.059876	0.651171
YBL076C	ILS1	tRNA aminoacylation for protein translation; isoleucyl-tRNA aminoacylation; translation; regulation of translational fidelity	aminoacyl-tRNA editing activity; ATP binding; nucleotide binding; aminoacyl-tRNA ligase activity; ligase activity; isoleucine-tRNA ligase activity	cytosol; cytoplasm	-0.0750586	0.243805	-0.894544	-1.33582	0.117613	-0.111033	-7.78451e-05	0.16998	0.138344	0.0362964	0.0863286	-0.0727908	-0.0536922	-0.107668	-0.383982	-0.211344	-0.359135	-0.330044	-0.341878	-0.594317	0.152047	-0.155932	-0.487005	-0.224506	-0.18823	-0.590805	-0.838842	-0.507088
YBL077W	YBL077W				-0.192034	-0.341841	-0.603267	0.443698	-0.17852	-0.182776	-0.0247463	1.44311	-1.17623	1.02626	-0.847269	-0.282404	0.291804	-0.406101	0.474552	-0.422759	0.661572	-0.177952	-0.413205	0.347377	0.109419	0.697959	-0.886835	0.486383	-0.268983	2.18447	-0.372806	-1.88146
YBL078C	ATG8	transport; CVT pathway; piecemeal microautophagy of nucleus; mitochondrion degradation; autophagy; ER to Golgi vesicle-mediated transport; protein transport; autophagic vacuole assembly	protein tag	membrane; fungal-type vacuole membrane; extrinsic to membrane; cytoplasmic vesicle; vacuole; vacuolar membrane; Cvt vesicle membrane; cytosol; pre-autophagosomal structure; autophagic vacuole; autophagic vacuole membrane	-0.131916	-1.30996	1.8449	2.62083	0.152887	-0.698473	0.515457	1.01372	0.504585	0.784376	0.554322	0.924152	0.0653319	0.688974	0.519418	0.962966	0.869972	1.11223	1.5016	1.05793	-0.461943	-0.0223325	1.13325	0.883056	0.971537	1.95658	1.62295	1.38957
YBL079W	NUP170	transport; chromosome segregation; mitotic spindle assembly checkpoint; mRNA transport; protein targeting to nuclear inner membrane; nucleocytoplasmic transport; protein transport; nuclear pore complex assembly	structural constituent of nuclear pore	membrane; nuclear membrane; nucleus; nuclear pore; nuclear pore inner ring; integral to membrane	-0.233339	0.833804	-1.82101	-1.61276	-0.0962813	0.146047	-0.0143182	-0.0343601	-0.0668903	-0.165086	-0.0461739	-0.289712	-0.248112	0.0661792	-0.203344	-0.13744	-0.178565	-0.403267	-0.391799	-0.677126	-0.0750915	-0.0210501	-0.284428	-0.403342	-0.169494	-0.734565	-0.658757	-0.530827
YBL080C	PET112	mitochondrial translation; translation; glutaminyl-tRNAGln biosynthesis via transamidation	ATP binding; nucleotide binding; carbon-nitrogen ligase activity, with glutamine as amido-N-donor; glutaminyl-tRNA synthase (glutamine-hydrolyzing) activity; ligase activity	mitochondrion; glutamyl-tRNA(Gln) amidotransferase complex	-0.147466	-0.598567	0.945311	1.13509	0.0515283	0.0351668	0.0677112	0.145195	0.0221849	-0.197511	-0.131519	0.472426	0.049463	-0.0763991	-0.0690249	-0.111502	0.014839	0.11988	0.311902	0.654443	-0.0629096	-0.0536081	-0.314092	0.228708	0.249566	-0.252648	0.502894	0.733751
YBL081W	YBL081W	biological_process	molecular_function	cellular_component	0.0973379	1.00395	-1.46518	-1.7526	0.165812	0.642288	-0.108607	-0.589566	-0.0417467	0.150522	-0.0307124	-0.44748	0.0711867	-0.333944	-0.21456	-0.437346	-0.271027	-0.36623	-0.687018	-0.601675	0.263401	-0.28233	-0.902908	-0.60804	-0.58191	-1.06658	-1.16195	-1.26381
YBL082C	ALG3	oligosaccharide-lipid intermediate biosynthetic process; protein glycosylation	transferase activity, transferring glycosyl groups; alpha-1,3-mannosyltransferase activity; transferase activity, transferring hexosyl groups; dol-P-Man:Man(5)GlcNAc(2)-PP-Dol alpha-1,3-mannosyltransferase activity; transferase activity	membrane; endoplasmic reticulum; integral to membrane; endoplasmic reticulum membrane	0.0503065	0.576542	-0.696163	-1.72756	0.327438	0.209589	0.216284	0.0176495	0.0627373	0.225874	-0.0957965	0.0399032	-0.122109	0.188887	0.406781	0.522051	0.0339502	-0.0863537	-0.0833826	-0.0663846	0.133405	-0.0316382	0.0426814	0.0191106	-0.318361	0.082814	-0.104324	-0.476399
YBL083C	YBL083C				0.15244	0.428064	-0.710078	-1.27377	0.126915	0.0519133	0.131907	-0.0360904	0.265953	0.274099	0.0117105	-0.102185	-0.220422	0.123765	0.26505	0.315094	0.587803	0.00346068	0.146071	-0.149097	-0.259705	-0.019586	-0.0955743	-0.160518	-0.34276	-0.0725351	-0.0980007	-0.57712
YBL084C	CDC27	cell division; anaphase-promoting complex-dependent proteasomal ubiquitin-dependent protein catabolic process; protein ubiquitination; cell cycle; mitosis	ubiquitin-protein ligase activity	nucleus; cytoplasm; anaphase-promoting complex	-0.379395	-0.66054	0.109751	0.78796	-0.337016	-0.273341	-0.276092	-0.134725	-0.259496	-0.440691	-0.107888	-0.115359	-0.455213	-0.375319	-0.46547	-0.368642	-0.411105	-0.57755	-0.249459	-0.268763	-0.291041	-0.414437	-0.399519	-0.625448	-0.340227	-0.550954	-0.112812	-0.0511516
YBL085W	BOI1	budding cell apical bud growth; cytokinesis, completion of separation	phospholipid binding	site of polarized growth; mating projection tip; cytoplasm; cellular bud neck; plasma membrane; cellular bud	-0.209141	-0.347177	-0.0816788	0.403616	-0.0270845	0.0635281	-0.219903	-0.150192	0.23449	-0.0789691	0.247926	0.192378	-0.150881	-0.328368	-0.380694	-0.551543	-0.403633	-0.110017	-0.042246	0.131393	0.044531	-0.0133011	-0.199176	-0.155196	0.0737528	-0.0307215	0.0146589	-0.0922379
YBL086C	YBL086C	biological_process	molecular_function	cellular_component	-0.153569	-0.673821	0.826179	0.786109	-0.389705	-0.579131	-0.111936	-0.226534	0.0757435	0.249862	0.136804	0.409004	-0.225628	-0.109142	0.0967885	-0.120213	0.497527	0.922534	1.05214	0.640467	-0.348159	-0.813475	-0.0241728	0.729989	1.16091	1.31643	0.80707	0.865932
YBL087C	RPL23A	translation; cytoplasmic translation	structural constituent of ribosome	ribosome; ribonucleoprotein complex; cytosolic large ribosomal subunit; cytoplasm	0.216589	0.404827	-0.826488	-1.92461	0.0174461	0.120708	-0.188312	-0.205667	-0.0564597	0.00870814	-0.0647099	-0.117774	0.0480979	0.0756867	0.0160403	-0.575725	0.322439	0.0407571	0.127101	0.185025	0.668886	0.677495	0.462682	0.657773	0.471335	0.674675	0.639168	0.432837
YBL088C	TEL1	phosphorylation; DNA damage induced protein phosphorylation; response to ionizing radiation; DNA repair; DNA damage checkpoint; replicative senescence; double-strand break repair; response to DNA damage stimulus; histone phosphorylation; telomere maintenance; chromatin modification	ATP binding; kinase activity; phosphotransferase activity, alcohol group as acceptor; telomeric DNA binding; protein serine/threonine kinase activity; nucleotide binding; protein kinase activity; transferase activity; transferase activity, transferring phosphorus-containing groups	nucleus; chromosome, telomeric region; mitochondrion; chromosome	0.0669904	0.46473	-0.218161	-0.232832	-0.186886	-0.039493	-0.0251188	0.0111787	0.206781	0.05943	0.265304	0.0109747	0.168992	-0.413176	-0.10309	-0.0317157	0.0909224	-0.00765823	-0.195902	0.464786	-0.173121	-0.196974	-0.0944759	-0.251506	0.120608	-0.532015	-0.47281	-0.190803
YBL089W	AVT5	transport; amino acid transport	transporter activity	membrane; vacuolar membrane; integral to membrane; vacuole	-0.146455	-0.241092	0.656372	0.619758	0.309797	0.175674	0.204676	0.23126	0.32067	0.203004	-0.0571439	0.554645	0.253416	0.291276	0.353362	0.462035	0.8657	0.347865	0.347832	0.153481	0.0128938	0.356182	0.694564	0.328543	-0.0652558	0.273208	0.309605	0.343206
YBL090W	MRP21	mitochondrial translation; translation; mitochondrial translational initiation	structural constituent of ribosome	ribosome; ribonucleoprotein complex; intracellular; mitochondrial small ribosomal subunit; mitochondrion	-0.205464	-0.574058	0.756595	0.34909	0.11711	0.0873449	-0.112945	0.210494	-0.256244	-0.13196	-0.214588	0.0740094	0.0185762	0.312845	0.59302	0.382619	0.311537	0.150859	0.0751644	0.240038	-0.280257	0.311591	0.784635	0.135448	-0.197442	0.729178	0.796007	0.332053
YBL091C	MAP2	proteolysis; cellular process; protein initiator methionine removal involved in protein maturation	metal ion binding; peptidase activity; hydrolase activity; aminopeptidase activity; metalloexopeptidase activity; metalloaminopeptidase activity	nucleus; cytoplasm	0.0500963	-0.0324417	-0.10481	-0.404727	0.284322	0.202036	0.0982329	0.0106177	0.196018	0.243901	0.246066	0.124618	0.0694307	0.131618	0.248656	0.163401	0.0129765	0.0630761	0.145695	0.239231	0.206702	0.00807263	-0.0650579	0.263553	0.300658	0.0814002	-0.067097	0.0527251
YBL091C-A	SCS22	phospholipid biosynthetic process; endoplasmic reticulum membrane organization; regulation of phosphatidylinositol dephosphorylation; chromatin silencing at telomere	molecular_function; structural molecule activity	membrane; cellular_component; integral to membrane	-0.341858	-1.33473	1.79041	1.77398	-0.481284	-0.400649	0.124867	0.312008	0.0241172	0.142887	0.370363	0.671288	-0.66656	-0.124419	-0.354288	-0.150038	-0.180055	-0.527566	0.467117	0.114745	-0.5019	-0.302799	0.322275	-0.00756578	0.206526	0.260966	0.907931	0.581928
YBL092W	RPL32	translation; cytoplasmic translation	structural constituent of ribosome	ribosome; ribonucleoprotein complex; intracellular; cytosolic large ribosomal subunit; cytoplasm	0.538672	0.14674	-0.0400426	-0.90127	0.824547	0.331517	0.538027	0.407487	0.482671	0.698745	0.472383	0.603251	0.349448	0.526011	0.363572	0.0835147	0.332098	0.294601	0.243422	-0.292942	0.171259	0.274606	-0.0931195	0.296344	0.320419	0.328027	0.00400609	-0.201518
YBL093C	ROX3	negative regulation of transcription from RNA polymerase II promoter; regulation of transcription from RNA polymerase II promoter; regulation of transcription, DNA-dependent; positive regulation of transcription from RNA polymerase II promoter; transcription, DNA-dependent; transcriptional open complex formation at RNA polymerase II promoter; RNA polymerase II transcriptional preinitiation comple…	RNA polymerase II transcription cofactor activity; RNA polymerase II transcription factor recruiting transcription factor activity	core mediator complex; nucleus; mediator complex	-0.133131	-0.0964808	-0.202583	-0.0644771	0.0711897	0.203981	-0.110754	-0.151719	-0.0346176	-0.0521707	-0.0944662	-0.159851	-0.21649	-0.2804	-0.457204	-0.397591	-0.365813	-0.488614	-0.412919	-0.857736	0.189107	-0.0572989	-0.181641	-0.0163106	-0.109232	0.0892736	-0.226684	0.135186
YBL094C	YBL094C				0.177624		-0.0911263	-0.734107	0.483602	-0.712985	-0.177558	-0.388752	-1.46304	-0.200461	-0.348173	-0.795371	-0.436166	0.16793	0.158394	-0.239128	0.508662	2.08501	0.496547	-0.739265	-1.34382	0.0447309	0.481338	-0.838621	-0.781049	-0.179319	0.107344	-0.232778
YBL095W	YBL095W	biological_process	molecular_function	mitochondrion	0.281384	-0.0245947	0.624388	0.236787	0.209036	-0.021082	0.0146168	-0.226036	0.125588	0.318202	0.180678	0.341908	0.0648	0.349559	0.347479	0.416062	0.524967	0.22949	0.129076	-0.00634787	0.162093	0.228335	0.179007	0.0883802	-0.190532	0.138253	-0.0955606	-0.259149
YBL096C	YBL096C				0.275493		-0.773039	-1.34658	0.245093	0.322754	-0.290575	-0.500656	-0.302094	0.0837686	-0.317653	0.213611	-0.488997	-0.0376801	0.0394435	-0.302576	0.411989	0.306087	0.291516	0.931824	-0.154271	0.255105	-0.291381	0.275652	0.200331	-0.724292	-0.0864789	-0.953432
YBL098W	BNA4	anthranilate metabolic process; metabolic process; pyridine nucleotide biosynthetic process; 'de novo' NAD biosynthetic process from tryptophan; tryptophan catabolic process; oxidation-reduction process; quinolinate biosynthetic process; NAD biosynthetic process	flavin adenine dinucleotide binding; monooxygenase activity; kynurenine 3-monooxygenase activity; oxidoreductase activity	membrane; mitochondrial membrane; mitochondrial outer membrane; mitochondrion	0.170336	0.249275	-0.111473	-0.0825596	0.386024	-0.263959	-0.101419	-0.0974491	0.215611	0.302556	0.0692331	0.120736	0.178545	0.0245115	-0.0410735	0.0251743	0.0823126	-0.183155	-0.12764	-0.564439	0.135772	-0.192435	-0.245192	-0.344113	-0.323454	-0.48267	-0.786622	-1.06577
YBL099W	ATP1	transport; ATP biosynthetic process; ATP metabolic process; ATP synthesis coupled proton transport; ATP hydrolysis coupled proton transport; ion transport; proton transport	hydrolase activity, acting on acid anhydrides, catalyzing transmembrane movement of substances; ATP binding; nucleotide binding; ATPase activity; proton-transporting ATPase activity, rotational mechanism; proton-transporting ATP synthase activity, rotational mechanism	membrane; proton-transporting ATP synthase complex, catalytic core F(1); mitochondrial nucleoid; mitochondrial proton-transporting ATP synthase, catalytic core; proton-transporting two-sector ATPase complex, catalytic domain; integral to membrane; mitochondrial inner membrane; mitochondrion	-0.0924097	-0.736491	1.39778	1.32336	0.264448	-0.211318	0.179479	0.0441347	0.0895889	0.197538	0.153497	0.390056	0.0783104	-0.0040283	-0.16605	-0.20016	-0.433257	-0.00739275	0.0524273	0.133074	-0.290707	-0.0175517	-0.0904992	0.192538	0.41762	0.269655	0.100094	0.466748
YBL100C	YBL100C				0.560601	1.82293	0.651662	1.5574	0.456171	-0.26248	0.7033	-1.21637	-0.572091	0.24936	-0.261323	-0.470199	-0.145872	-0.119964	-0.362188	-1.59903	-0.406692	-0.47492	0.00695655	0.343736	-0.224129	0.502678	-0.243949	0.00704288	0.0369071	-0.147139	0.464156	0.344703
YBL101C	ECM21	ubiquitin-dependent endocytosis	ubiquitin protein ligase binding	cytoplasm	0.327075	0.23379	0.577175	0.882901	0.0400443	-0.0606095	0.0121585	0.238747	0.47889	0.110968	0.200281	0.242453	0.34997	0.165047	0.599809	0.849918	0.260234	0.767964	0.508206	1.15685	0.0898616	-0.0680131	0.119183	0.372071	0.549782	0.221629	0.323853	0.503352
YBL102W	SFT2	transport; Golgi to endosome transport; protein transport; vesicle-mediated transport	molecular_function	membrane; Golgi apparatus; integral to membrane; Golgi membrane	0.178083	0.00464747	0.0780423	0.0965909	0.517991	0.0015282	0.308809	0.366634	0.472401	0.490081	0.298309	0.619794	0.0877216	0.334329	0.398446	0.649302	0.962799	0.550987	0.790705	0.283583	-0.0265433	0.203647	0.232846	0.534674	0.210128	0.810299	0.78986	0.489247
YBL103C	RTG3	regulation of transcription, DNA-dependent; cellular response to oleic acid; positive regulation of transcription from RNA polymerase II promoter; mitochondria-nucleus signaling pathway; transcription, DNA-dependent; transcription factor import into nucleus; mitochondrion degradation	DNA binding; sequence-specific DNA binding RNA polymerase II transcription factor activity; sequence-specific DNA binding; RNA polymerase II transcription factor binding; protein dimerization activity	nucleus; cytoplasm	-0.0372266	-0.23901	0.148244	0.138609	-0.053395	0.127393	0.37666	-0.0549656	0.149663	0.0101679	0.116766	-0.0581645	-0.0753576	0.0190336	0.17997	-0.166857	-0.0381815	-0.142342	-0.0992692	-0.0845421	-0.316802	-0.15361	-0.217266	-0.156074	-0.376813	-0.593526	-0.320143	-0.414957
YBL104C	SEA4	transport; biological_process; protein transport	molecular_function	membrane; vacuolar membrane; extrinsic to fungal-type vacuolar membrane; Seh1-associated complex; cytoplasm; vacuole	0.0422906	0.373588	-1.12104	-0.448448	-0.285944	0.0526681	-0.332461	0.0612594	0.165942	-0.0382173	0.119559	-0.157782	0.221969	-0.0234155	-0.267475	-0.0506774	-0.224808	-0.33092	-0.272344	-0.141281	0.574664	0.112793	-0.0513118	-0.0165241	0.0726815	-0.275368	-0.448213	-0.176262
YBL105C	PKC1	phosphorylation; signal transduction; regulation of nuclear-transcribed mRNA poly(A) tail shortening; protein phosphorylation; peroxisome degradation; intracellular signal transduction; intracellular protein kinase cascade; regulation of fungal-type cell wall organization; actin filament organization; cytoplasmic mRNA processing body assembly; cell cycle	ATP binding; kinase activity; protein kinase C activity; metal ion binding; protein serine/threonine kinase activity; protein kinase activity; nucleotide binding; transferase activity; transferase activity, transferring phosphorus-containing groups	cytoskeleton; nucleus; site of polarized growth; cytoplasm; plasma membrane	-0.187167	0.147763	0.0732724	0.170811	0.0016797	0.550836	0.0645168	0.189947	-0.143202	-0.0625146	0.134713	-0.179784	-0.00647999	0.242467	0.396036	-0.163599	-0.127881	-0.0310245	-0.389603	0.450824	0.338853	0.148973	0.262354	0.437147	0.221856	0.191124	0.013209	0.178862
YBL106C	SRO77	Golgi to plasma membrane transport; exocytosis	molecular_function	plasma membrane	0.278358	0.612184	-0.730817	-0.456533	-0.0766971	0.0608229	0.0133867	-0.201616	-0.0333841	-0.253971	-0.276335	-0.434448	0.326321	-0.0398541	-0.0569233	0.181198	-0.162864	-0.563563	-0.257508	-0.186535	-0.292409	0.0351056	-0.525335	-0.337939	-0.449598	-0.666665	-0.652845	-0.707338
YBL107C	MIC23	biological_process	molecular_function	mitochondrial intermembrane space; cytoplasm	0.0456797	-0.226233	0.00574266	-0.100391	0.0878393	-0.0564496	-0.0177258	0.0978669	-0.0205389	0.148159	-0.0914984	-0.0989831	-0.33849	0.0483745	0.186616	0.220105	0.0211123	0.0120623	-0.288189	-0.218577	-0.12303	-0.115603	-0.0672964	0.1057	-0.093829	0.0179838	-0.0809605	-0.256314
YBL107W-A	YBL107W-A				0.227329	-0.0528941	0.0102637	0.159302	0.506389	0.0867629	0.77455	0.636059	0.928101	0.842114	0.919379	0.615076	0.112669	0.0623223	0.0970307	-0.096475	-0.136025	-0.0197294	0.0353783	-0.752591	0.0126785	-0.140622	-0.0757041	-0.281371	0.133858	-0.101818	-0.313286	-0.536169
YBL108C-A	PAU9	response to stress; biological_process	molecular_function	cellular_component	0.0423811	-0.385341	0.644923	0.859386	-0.0732792	-0.138999	-0.0407866	-0.0539882	-0.0453652	0.22384	0.0916597	0.272766	-0.141209	0.401528	0.223436	0.165985	0.233833	0.437025	0.588078	0.411685	-0.189035	-0.0725373	-0.102944	-0.0265037	-0.170511	-0.128746	0.117472	0.113813
YBL109W	YBL109W				-0.20155	0.4924	-0.45072	0.545905	0.13801	0.44259	0.528651	0.404837	-0.100474	-0.0278323	0.170771	0.0185984	0.202744	-0.0777469	0.354477	0.357441	0.362483	-0.00460136	-0.127763	0.748376	-0.190656	-0.378377	0.0216593	-0.685197	-0.228048	0.133415	-0.298981	0.0194612
YBL111C	YBL111C	biological_process	molecular_function; ATP binding; nucleotide binding; nucleic acid binding; ATP-dependent helicase activity	mitochondrion	0.0571703	-0.69449	0.489967	0.519395	0.172231	0.12661	0.0610796	0.415291	0.0500171	0.301706	0.311124	0.0929248	-0.113384	0.264779	0.409693	0.237104	0.696136	0.421911	0.997672	0.340054	0.241713	0.730005	1.17918	1.2254	0.574134	1.00054	0.826254	0.881057
YBL112C	YBL112C	biological_process	molecular_function; ATP binding; helicase activity; nucleic acid binding	cellular_component	0.368129	-0.263839	0.217126	0.417638	0.502376	0.0907899	0.261589	0.510495	0.241528	0.376165	0.245353	0.0711306	-0.15015	0.259958	0.595542	0.577815	0.944456	0.477969	1.01751	-0.169717	-0.0672403	0.613417	1.21778	0.983112	0.45622	0.803567	0.609183	0.548398
YBL113C	YBL113C	biological_process	helicase activity	cellular_component	0.28164	0.450496	-0.421602	-0.256783	0.500564	-0.241062	0.0176833	-0.054049	0.21735	0.414094	0.347148	0.458427	0.313368	0.369454	0.717356	0.482172	0.693101	0.652344	0.706227	0.735498	0.465896	0.151643	0.239275	0.344066	0.528792	0.433088	0.486509	0.288158
YBR001C	NTH2	metabolic process; trehalose catabolic process; trehalose metabolic process	hydrolase activity; alpha,alpha-trehalase activity; calcium ion binding; catalytic activity; hydrolase activity, acting on glycosyl bonds	mitochondrion; cytoplasm	0.110989	-0.943383	1.27234	1.87091	0.297937	-0.3397	0.222791	0.344815	0.518325	0.302348	0.53134	0.68293	0.0445332	0.00894425	0.25517	0.268454	0.244433	0.557603	0.797539	1.26228	0.183064	-0.310971	0.0680835	0.10972	0.721561	0.732073	0.69114	1.0663
YBR002C	RER2	protein glycosylation; dolichol biosynthetic process; ER to Golgi vesicle-mediated transport	transferase activity, transferring alkyl or aryl (other than methyl) groups; prenyltransferase activity; dehydrodolichyl diphosphate synthase activity; transferase activity	membrane; endoplasmic reticulum; endoplasmic reticulum membrane	0.0288672	0.982507	-1.29494	-1.68491	0.335514	0.100441	-0.0945694	-0.429299	-0.0469788	0.0137848	-0.164302	-0.273171	-0.215857	-0.308647	-0.324949	-0.243218	-0.345655	-0.460148	-0.429048	-0.843624	-0.0520254	-0.0379617	-0.650492	-0.260996	-0.533219	-0.646114	-0.581565	-0.715272
YBR003W	COQ1	isoprenoid biosynthetic process; ubiquinone biosynthetic process	metal ion binding; transferase activity; trans-hexaprenyltranstransferase activity	membrane; mitochondrial inner membrane; mitochondrion	-0.0580344	-0.468006	0.421708	0.58512	0.177282	-0.159725	-0.131564	0.0298812	0.210459	0.312208	0.159998	0.305926	-0.0294642	0.160189	0.404046	0.161909	0.738282	0.522652	0.610714	0.390976	0.086337	0.234819	0.243062	0.600034	0.327795	0.961962	0.576639	0.525595
YBR004C	GPI18	GPI anchor biosynthetic process	transferase activity, transferring glycosyl groups; dolichyl-phosphate-mannose-glycolipid alpha-mannosyltransferase activity; transferase activity, transferring hexosyl groups; mannosyltransferase activity; transferase activity	membrane; mannosyltransferase complex; endoplasmic reticulum; integral to endoplasmic reticulum membrane; integral to membrane; endoplasmic reticulum membrane; mitochondrion	-0.0453506	0.588952	-0.615393	-0.639393	0.0900026	0.439351	-0.15458	-0.187914	-0.355744	-0.325567	-0.366869	-0.539174	0.0184731	-0.0719105	-0.288279	-0.053794	-0.00639537	-0.259863	-0.0988295	-0.410021	0.121606	0.11742	-0.119217	-0.240939	-0.452291	-0.375375	-0.326702	-0.230445
YBR005W	RCR1	fungal-type cell wall organization; vesicle-mediated transport	molecular_function	membrane; endoplasmic reticulum; integral to endoplasmic reticulum membrane; integral to membrane; endoplasmic reticulum membrane	0.0336559	-0.203743	0.363404	0.696637	0.186576	0.0510562	0.0311879	0.146302	0.227296	0.296315	0.240284	0.309611	-0.0109746	0.174556	0.212217	0.2482	0.529662	0.208845	0.446356	0.435042	0.193873	0.296573	0.49338	0.58465	0.108949	0.740004	0.810988	1.07343
YBR006W	UGA2	metabolic process; glutamate decarboxylation to succinate; cellular response to oxidative stress; gamma-aminobutyric acid catabolic process; oxidation-reduction process	oxidoreductase activity, acting on the aldehyde or oxo group of donors, NAD or NADP as acceptor; succinate-semialdehyde dehydrogenase [NAD(P)+] activity; oxidoreductase activity	cytoplasm	-0.0201912	-1.21861	1.49322	1.31068	0.190051	-0.187817	0.0584778	0.73461	0.885855	0.516597	0.353343	0.751644	-0.2207	0.177274	0.195619	0.279548	0.404832	0.576224	0.60595	1.22853	-0.506736	-0.307642	0.0421509	0.222011	0.854455	-0.105848	1.16943	1.04251
YBR007C	DSF2	biological_process	molecular_function	cellular bud tip	-0.236475	-0.420593	-0.0877312	0.523856	-0.120039	-0.389185	-0.0993259	-0.307933	-0.355502	-0.290299	-0.367007	-0.328695	-0.0450226	-0.469979	-0.542201	-0.47704	-0.916054	-0.575974	-0.443098	-0.36543	-0.388589	-0.478231	-0.332526	-0.192643	-0.547678	-0.387604	-0.755042	-0.399681
YBR008C	FLR1	transport; drug transport; transmembrane transport; drug transmembrane transport	drug transmembrane transporter activity; fluconazole transporter activity	membrane; nucleus; integral to membrane; plasma membrane; cytoplasm	-0.260681	-0.60615	0.365661	0.123971	0.213411	-0.117042	0.103428	0.105734	0.100215	-0.0624704	0.0358806	-0.20787	-0.135886	-0.0961009	-0.315991	-0.253396	0.0190714	-0.127293	-0.084595	-0.203321	0.0559287	-0.125584	-0.280871	-0.0459402	-0.366577	-0.655881	-0.308714	-0.197547
YBR009C	HHF1	chromatin assembly or disassembly; nucleosome assembly; sexual sporulation resulting in formation of a cellular spore; histone H3-K79 methylation	DNA binding; protein heterodimerization activity	nucleus; replication fork protection complex; chromosome; nuclear nucleosome; nucleosome	0.171223	-0.65319	0.898736	0.720827	0.31587	-0.230159	0.201615	0.118316	-0.122248	-0.176223	0.0435794	0.399345	0.0949908	0.200656	-0.194668	-0.0542919	0.0913857	-0.0907398	0.0436446	-0.29017	0.612635	0.320294	0.141309	0.521414	0.288073	0.107091	0.0310856	0.0394091
YBR010W	HHT1	chromatin assembly or disassembly; DNA repair; nucleosome assembly; mitotic spindle assembly checkpoint; sexual sporulation resulting in formation of a cellular spore; global genome nucleotide-excision repair; rRNA transcription; response to DNA damage stimulus	DNA binding; protein heterodimerization activity	centromere-specific nucleosome; nucleus; replication fork protection complex; chromosome; nucleosome; nuclear nucleosome	0.156287	-1.00529	1.13732	0.530238	0.506253	-0.195632	0.316072	0.324668	-0.244808	-0.0851425	0.0619946	0.334269	0.15662	0.243998	-0.226022	0.0277735	0.217652	-0.164539	0.020802	-0.686621	0.270659	0.153864	0.141966	0.249137	-0.354339	-0.23474	-0.0920957	-0.607257
YBR011C	IPP1	phosphate-containing compound metabolic process	magnesium ion binding; metal ion binding; hydrolase activity; inorganic diphosphatase activity	nucleus; cytoplasm	-0.0130809	0.0572825	-0.606337	-0.978055	-0.0375869	0.309155	0.0462121	-0.0724955	0.326907	0.117651	0.261801	0.166255	0.049366	-0.0600331	-0.0879	0.140827	-0.165214	-0.0665354	-0.0658886	0.459943	0.468545	-0.0963376	-0.307847	0.167352	0.235382	0.0460109	-0.0391115	0.406384
YBR012C	YBR012C				-0.550759	0.251789	-1.05811	-0.507296	0.0737398	0.0932663	-0.0819755	-0.0318454	0.205843	-0.0922539	0.114602	-0.143452	0.113399	-0.0483479	0.0460218	0.358219	0.0352562	-0.0915224	-0.365742	-0.130149	-0.0495053	0.368956	0.178857	-0.179976	-0.276183	-0.888354	-0.206025	0.278742
YBR013C	YBR013C	biological_process	molecular_function	cellular_component	-0.372758	-0.860675	1.41542	2.01675	-0.0978673	-0.206329	-0.387032	-0.338079	-0.0306749	0.102387	-0.164809	0.190169	-0.135246	0.250672	-0.0673108	-0.0854475	0.374581	0.36867	0.171873	0.560451	-0.184439	-0.272279	0.0177219	-0.525966	-0.120917	0.978246	0.609465	0.694487
YBR014C	GRX7	cellular response to oxidative stress; cell redox homeostasis	protein disulfide oxidoreductase activity; electron carrier activity; 2 iron, 2 sulfur cluster binding; metal ion binding; protein homodimerization activity; iron-sulfur cluster binding; glutathione-disulfide reductase activity	fungal-type vacuole; Golgi apparatus; integral to membrane; cis-Golgi network; Golgi lumen	-0.248596	-0.629702	0.691167	1.09504	0.000647903	-0.461924	0.00282371	0.4084	-0.0907032	-0.237791	-0.185346	0.160884	-0.272832	0.11581	-0.140127	0.070712	0.486971	-0.107435	0.358859	-0.132612	-0.49527	0.175843	0.529955	0.34622	-0.233266	0.362628	0.784282	0.429686
YBR015C	MNN2	protein glycosylation	alpha-1,2-mannosyltransferase activity; transferase activity	membrane; Golgi apparatus; integral to membrane; Golgi membrane	0.0205406	0.222288	-0.636327	-0.849467	-0.157036	0.220095	0.0554912	0.0479958	0.201582	-0.0714821	0.00277168	0.088507	0.0830053	0.225316	-0.157218	0.121172	0.368903	0.0607592	0.222866	0.423025	-0.195803	0.254447	-0.255057	-0.148645	0.0986368	0.48047	0.60298	0.723903
YBR016W	YBR016W	biological_process	molecular_function	mating projection membrane; cellular bud membrane; plasma membrane	0.234611	0.0748761	0.363303	0.402152	-0.0827283	-0.00528937	-0.0255619	-0.0537671	0.293368	0.0164404	0.207043	0.0985064	0.113682	0.254189	0.329169	0.280889	0.219203	0.290174	0.189735	0.741878	0.205336	0.213328	0.0240284	0.440511	0.613966	0.577631	0.308851	0.447166
YBR017C	KAP104	transport; mRNA-binding (hnRNP) protein import into nucleus; protein import into nucleus; cell cycle; protein transport; transcription factor import into nucleus	nuclear localization sequence binding	cytosol; integral to membrane; cellular bud tip; cytoplasm; cellular bud neck	0.0185645	0.59762	-1.13859	-1.24205	0.0113521	0.32653	0.0486311	-0.122893	0.080132	-0.0719561	-0.0400645	-0.238927	0.0850261	0.0324122	0.100576	-0.116056	-0.324242	-0.0775585	-0.0995942	0.0968972	0.16942	-0.0791177	-0.310409	-0.312126	-0.130692	-0.424322	-0.789564	-0.565111
YBR018C	GAL7	galactose catabolic process via UDP-galactose; carbohydrate metabolic process; galactose metabolic process	metal ion binding; UDP-glucose:hexose-1-phosphate uridylyltransferase activity; nucleotidyltransferase activity; zinc ion binding; transferase activity; catalytic activity	cytoplasm	-0.635906	-1.96744	2.59216	3.22133	0.344679	0.118946	-0.290703	0.0408307	0.350187	-0.0455294	0.49385	0.808061	0.496386	-0.484424	-0.774548	0.976849	1.02181	-0.164083	0.67973	0.676925	-0.0791246	-0.879457	1.41761	0.819286	0.843237	-0.00100955	1.3387	0.0628174
YBR020W	GAL1	carbohydrate phosphorylation; phosphorylation; galactose catabolic process via UDP-galactose; metabolic process; carbohydrate metabolic process; galactose metabolic process; positive regulation of transcription by galactose	ATP binding; nucleotide binding; kinase activity; phosphotransferase activity, alcohol group as acceptor; transferase activity; galactokinase activity	cytoplasm	0.40306	0.28044	0.0232759	0.650723	0.333625	-0.367533	0.170468	-0.186067	0.119207	-0.514354	0.139702	-0.13203	-0.305561	0.373536	0.312382	0.398169	0.309608	-0.0772575	-0.0700235	0.645425	-0.0230663	-0.2344	0.115829	-0.10186	-1.34081	0.0465191	-0.11492	0.183948
YBR021W	FUR4	transport; transmembrane transport; nucleobase transport; uracil transport	nucleobase transmembrane transporter activity; uracil:cation symporter activity; transporter activity	membrane; membrane raft; integral to membrane; plasma membrane	0.240522	1.50756	-1.61849	-1.62035	0.10031	0.99128	0.314148	0.234674	0.257824	0.164414	0.130418	0.00187912	0.380453	0.390341	-0.187714	-0.0474678	-0.0735474	-0.399683	-0.401195	-0.475696	0.25265	0.688239	0.291068	-0.347777	-0.759778	-1.22131	-1.04694	-0.461074
YBR022W	POA1	tRNA splicing, via endonucleolytic cleavage and ligation	hydrolase activity; phosphatase activity	cellular_component	-0.395833	-0.268838	0.261658	1.05541	-0.533734	-0.262755	-0.343797	-0.180723	-0.23301	-0.39119	-0.223328	0.0221887	-0.357509	-0.319259	-0.638585	-0.565633	-0.15603	-0.0964009	-0.26277	-0.426471	-0.247345	0.141229	0.204045	0.0160142	-0.186516	-0.112955	0.853943	0.607944
YBR023C	CHS3	ascospore wall assembly; cytokinesis; fungal-type cell wall chitin biosynthetic process	transferase activity, transferring glycosyl groups; chitin synthase activity; transferase activity, transferring hexosyl groups; transferase activity	membrane; mating projection tip; cytoplasm; cellular bud neck; chitosome; integral to membrane; incipient cellular bud site; prospore membrane	0.0781235	0.609872	-0.957278	-0.865843	0.0502451	0.488165	0.193306	0.0959751	0.347373	0.123876	0.31695	0.361622	0.241498	0.234795	0.0101624	0.055955	0.362867	0.072358	0.211137	0.396178	0.534524	0.640956	0.223201	0.0839369	-0.117442	-0.0310672	-0.0389519	0.183638
YBR024W	SCO2	cellular copper ion homeostasis; respiratory chain complex IV assembly; copper ion transport	metal ion binding; copper ion binding; thioredoxin peroxidase activity	membrane; mitochondrial envelope; integral to membrane; mitochondrial inner membrane; mitochondrion	-0.00908436	-0.449681	0.741301	0.925401	0.24806	-0.375661	0.026642	0.0685547	-0.093764	0.353258	0.137701	0.472287	-0.382099	0.112775	0.00857686	-0.0395697	0.205647	0.17677	0.514768	0.534773	0.13041	0.089975	-0.00241232	0.314301	0.326641	1.04936	0.996828	1.06777
YBR025C	OLA1	biological_process	ATP binding; hydrolase activity; nucleotide binding; GTP binding; ATPase activity	cytoplasm	-0.0671781	0.546874	-1.47752	-1.95937	0.071207	-0.220056	0.0208814	0.0741189	-0.0165551	-0.146798	-0.0393727	-0.0979445	0.0263031	-0.121575	-0.225213	-0.192084	-0.410317	-0.392356	-0.357502	-0.820759	0.410857	-0.0570962	-0.113539	0.0707237	0.125902	-0.18097	-0.38836	-0.199315
YBR026C	ETR1	fatty acid metabolic process; fatty acid biosynthetic process; aerobic respiration; oxidation-reduction process; lipid metabolic process	DNA binding; trans-2-enoyl-CoA reductase (NADPH) activity; enoyl-[acyl-carrier-protein] reductase activity; zinc ion binding; enoyl-[acyl-carrier-protein] reductase (NADPH, B-specific) activity; oxidoreductase activity	mitochondrial matrix; mitochondrion	0.0321536	-0.506682	1.18433	1.26871	-0.0421068	0.0159942	-0.171744	-0.0453433	0.0439997	0.106195	0.136761	0.335755	0.119846	-0.213763	-0.0890753	0.196052	0.186871	0.3438	0.729935	1.14017	0.0201636	0.177973	0.154045	0.492482	0.822985	1.06935	1.25441	1.59654
YBR028C	YPK3	phosphorylation; protein phosphorylation; biological_process	protein serine/threonine kinase activity; ATP binding; nucleotide binding; kinase activity; protein kinase activity; transferase activity; transferase activity, transferring phosphorus-containing groups	cytoplasm	0.150756	0.756205	-0.781388	-0.834068	0.22525	0.0619634	0.0786304	-0.0792683	-0.230777	0.254393	0.055861	0.202477	0.0850456	0.0575091	-0.0466415	-0.0221938	-0.24529	0.0728528	-0.224078	-0.12184	-0.0582843	-0.287201	-0.292128	0.0951068	-0.0100682	-0.0477343	-0.0905212	-0.0523016
YBR029C	CDS1	phospholipid biosynthetic process; phosphatidylserine metabolic process; phosphatidylinositol metabolic process; CDP-diacylglycerol biosynthetic process; lipid metabolic process	nucleotidyltransferase activity; phosphatidate cytidylyltransferase activity; transferase activity; transferase activity, transferring phosphorus-containing groups	membrane; endoplasmic reticulum; integral to membrane; endoplasmic reticulum membrane; mitochondrion; Golgi to plasma membrane transport vesicle; mitochondrial membrane	-0.231691	0.636289	-1.57545	-1.92508	-0.331301	0.146533	0.0436038	-0.0667218	-0.0882281	-0.246603	-0.100616	-0.295828	0.0311858	0.17705	0.0367059	0.2709	0.298	-0.377461	-0.0652845	-0.0986285	-0.132474	0.268861	-0.130059	-0.396879	-0.528215	-0.3211	-0.367635	-0.485696
YBR030W	RKM3	peptidyl-lysine monomethylation; methylation	protein-lysine N-methyltransferase activity; methyltransferase activity; transferase activity	nucleus; cytosol	-0.262756	0.119637	-0.555425	-1.30425	-0.121734	0.13998	-0.168721	-0.351856	-0.190675	-0.133524	-0.294626	-0.746963	-0.213466	-0.263705	-0.165721	-0.340384	-0.133148	-0.488984	-0.493136	-0.862516	-0.314217	-0.0768375	-0.527283	-0.437755	-0.506187	-0.636859	-0.674287	-0.622024
YBR031W	RPL4A	translation; cytoplasmic translation	RNA binding; structural constituent of ribosome	ribosome; ribonucleoprotein complex; cytosolic large ribosomal subunit; cytoplasm	0.397013	-0.0431796			0.156234	0.287408	0.0385874	0.173639	0.208646	0.292729	0.180939	0.129027	0.12881	0.343964	0.296427	0.445642	0.138417	0.237611		0.145905	0.151128	0.104233	-0.329803	0.0592239	0.0794267	-0.153324		-0.397698
YBR033W	EDS1	regulation of transcription from RNA polymerase II promoter; regulation of transcription, DNA-dependent; transcription, DNA-dependent; biological_process; transcription from RNA polymerase II promoter	metal ion binding; sequence-specific DNA binding RNA polymerase II transcription factor activity; DNA binding; zinc ion binding; sequence-specific DNA binding	cellular_component; nucleus	-0.193057	-1.87144	3.43983	3.58138	-1.11102	-0.415916	-0.0175644	0.0543788	0.224134	0.477162	0.16826	0.758128	-0.230621	-0.153134	-0.0145934	0.140794	0.122606	0.569805	0.805498	1.01691	-0.298541	-0.324779	0.00840701	0.554996	0.714249	0.477952	0.989021	0.925062
YBR034C	HMT1	mRNA export from nucleus; negative regulation of DNA-dependent transcription, termination; positive regulation of transcription elongation from RNA polymerase II promoter; protein methylation; methylation; peptidyl-arginine methylation	protein-arginine omega-N asymmetric methyltransferase activity; methyltransferase activity; protein-arginine omega-N monomethyltransferase activity; transferase activity	nucleus	0.0730271	1.27059	-2.40694	-2.81954	0.363066	0.99919	0.132057	-0.247204	-0.265345	-0.256286	-0.458807	-0.905254	0.0701987	0.0406395	-0.391714	-0.259549	-0.76164	-1.03273	-1.24903	-1.66855	0.226985	0.332973	-0.428689	-0.330402	-0.632627	-1.06917	-1.48931	-1.26925
YBR035C	PDX3	pyridoxine biosynthetic process; pyridoxal 5'-phosphate salvage; oxidation-reduction process	pyridoxamine-phosphate oxidase activity; oxidoreductase activity, acting on the CH-NH2 group of donors; FMN binding; oxidoreductase activity	mitochondrial intermembrane space	0.208402	-0.0908981	0.473108	0.271778	0.312919	-0.0371197	0.1005	0.0374003	-0.0449144	-0.0112091	-0.11261	0.272051	0.0559495	-0.0558979	0.0668888	0.281505	-0.116861	-0.0135393	0.133905	0.282122	-0.0464291	0.0337335	-0.0589797	0.354412	0.254756	0.638604	0.55941	0.865375
YBR036C	CSG2	glycosphingolipid biosynthetic process; cellular calcium ion homeostasis	enzyme regulator activity	membrane; endoplasmic reticulum; integral to endoplasmic reticulum membrane; integral to membrane; endoplasmic reticulum membrane	0.231798	-0.275313	0.932694	1.09881	0.0916582	0.0246861	0.0180708	0.0732162	0.182597	0.194104	0.0681887	0.312942	-4.80207e-05	0.347937	0.471944	0.635324	0.726722	0.387905	0.436567	0.622221	-0.140564	0.236015	0.124622	0.150729	-0.127876	0.432665	0.336972	0.169651
YBR037C	SCO1	response to redox state; cellular copper ion homeostasis; respiratory chain complex IV assembly; protein complex assembly; copper ion transport	metal ion binding; copper ion binding; thioredoxin peroxidase activity	membrane; integral to membrane; mitochondrial inner membrane; mitochondrion	0.179424	-0.735039	0.686298	0.412083	0.0320052	-0.242253	-0.00285328	0.024921	0.0133233	0.335224	0.0844375	0.649304	-0.313097	0.0580963	0.509399	0.550145	0.903403	1.28847	0.952083	1.05887	0.337701	0.277297	0.0857858	0.267557	0.293682	1.24927	0.845749	1.2578
YBR038W	CHS2	chitin biosynthetic process; cytokinesis; actomyosin contractile ring contraction	transferase activity, transferring glycosyl groups; chitin synthase activity; transferase activity	membrane; integral to membrane; cellular bud neck	0.0488756	0.837263	-1.50841	-1.79456	-0.215318	0.0153847	0.145797	0.0159502	0.402542	0.292548	0.259718	0.00760459	0.0759701	0.0669255	0.327421	0.311958	0.54819	0.260962	0.372116	0.38567	0.119639	0.159284	0.136052	-0.0292817	0.330983	0.543146	0.336663	-0.172019
YBR039W	ATP3	transport; ATP biosynthetic process; ATP synthesis coupled proton transport; proton transport; ion transport	proton-transporting ATP synthase activity, rotational mechanism; proton-transporting ATPase activity, rotational mechanism	proton-transporting ATP synthase complex, catalytic core F(1); membrane; integral to membrane; mitochondrial inner membrane; mitochondrion; mitochondrial proton-transporting ATP synthase, central stalk	-0.285775	-0.995577	1.01185	1.48954	-0.0109324	-0.278218	-0.19265	-0.0953061	0.0446552	-0.059086	0.082038	0.097043	-0.214453	-0.0089664	-0.43582	-0.59563	-0.289812	-0.258405	0.0730687	-0.152275	0.252102	-0.0208483	-0.222039	0.121181	-0.0194743	0.0404311	0.0386983	0.57654
YBR041W	FAT1	long-chain fatty acid transport; transport; very long-chain fatty acid metabolic process; metabolic process; lipid transport	catalytic activity; long-chain fatty acid transporter activity; very long-chain fatty acid-CoA ligase activity	membrane; endoplasmic reticulum; lipid particle; integral to membrane; intrinsic to internal side of plasma membrane; peroxisome	-0.0479178	0.436334	-0.760713	-1.09161	0.178293	0.318798	0.0888125	-0.00498514	0.0136619	0.180523	0.181107	0.576618	0.0898416	0.284584	0.349374	0.523802	0.39197	0.5192	0.534261	0.810871	0.278464	0.599759	0.466322	0.335799	0.0974878	0.305423	0.581069	0.75915
YBR042C	CST26	phospholipid biosynthetic process; metabolic process; lipid metabolic process	transferase activity, transferring acyl groups; transferase activity	membrane; lipid particle; integral to membrane	-0.104744	0.10966	-0.622021	-0.900359	0.280038	0.213083	0.140733	0.102562	-0.160058	0.191681	-0.146792	0.171973	0.229437	0.464942	0.292323	0.92753	0.659949	0.416661	0.32169	0.0856401	0.137209	0.543154	0.282271	0.193208	-0.387628	0.582858	0.207308	0.0719175
YBR043C	QDR3	transport; transmembrane transport; polyamine homeostasis; drug transmembrane transport	polyamine transmembrane transporter activity; drug transmembrane transporter activity	membrane; integral to membrane; plasma membrane	-0.0151002	0.0829635	0.0976732	0.159068	-0.266438	0.0366676	0.597028	0.682519	0.756689	0.307454	-0.0397251	-0.211424	-0.200118	0.341151	0.417391	0.497471	0.59101	0.0840481	-0.441503	-0.134527	-0.293462	0.068152	0.101266	-0.31809	-0.548189	-0.506166	-0.352331	-0.594343
YBR044C	TCM62	cellular protein metabolic process; response to stress; mitochondrial respiratory chain complex II assembly	ATP binding; unfolded protein binding; nucleotide binding	membrane; integral to membrane; mitochondrial inner membrane; mitochondrion	0.18483	0.0763219	0.0530779	1.13397	0.169599	-0.217752	0.0279801	0.2377	-0.0672833	0.10952	-0.117482	-0.221839	0.373119	0.0785596	0.259574	-0.108795	-0.0115214	0.238805	-0.0819342	0.414446	0.138861	0.0592053	0.214786	-0.00396522	-0.0469632	0.0571045	0.293014	0.427818
YBR045C	GIP1	ascospore wall assembly; regulation of phosphoprotein phosphatase activity	protein phosphatase type 1 regulator activity; protein phosphatase 1 binding	protein phosphatase type 1 complex; prospore membrane	1.30411		0.381516	0.464664	-0.896618	-0.155059	-0.643294	-0.214634	0.305606	0.27749	0.128415	-0.696859	-0.0681413	-0.23248	-1.70487	-0.47101	0.508299	0.433082	1.02094	0.962772	0.260147	-0.537419	0.0626808	0.550651	-0.139992	-0.443817	0.717758	1.50082
YBR046C	ZTA1	cellular response to oxidative stress; oxidation-reduction process	2-alkenal reductase [NAD(P)] activity; AU-rich element binding; zinc ion binding; NADPH:quinone reductase activity; oxidoreductase activity	nucleus; cytoplasm	-0.221056	-1.3915	2.10677	2.3494	0.129142	-0.343045	0.21941	0.358636	0.346971	0.578067	0.384725	0.697065	0.0385258	-0.154397	0.373958	0.595667	0.567392	0.859995	0.874056	1.38796	-0.0187273	-0.217936	0.431743	0.517062	0.791884	1.30492	1.35202	1.32918
YBR047W	FMP23	biological_process	molecular_function	mitochondrion	-0.578179		0.933707	1.56335		-0.184114	1.32928	1.92754	0.916128	0.762229	-0.0361801	0.185808	-1.03035		1.19588	0.533105	0.198289	-0.274006		1.12215	0.330098	0.0929108	-1.01132	0.276974	0.636884		1.40583	0.579784
YBR048W	RPS11B	maturation of SSU-rRNA from tricistronic rRNA transcript (SSU-rRNA, 5.8S rRNA, LSU-rRNA); ribosomal small subunit assembly; translation; cytoplasmic translation	RNA binding; structural constituent of ribosome; rRNA binding	ribosome; 90S preribosome; ribonucleoprotein complex; intracellular; cytosolic small ribosomal subunit; cytoplasm	0.0513429	0.147148	-0.448314	-0.969638	0.214988	-0.115721	0.0445159	-0.214489	0.224452	0.301682	0.0587492	0.294039	-0.112627	0.103966	-0.0277205	-0.513747	-0.00609415	-0.0462127	-0.178478	-0.495586	-0.172337	-0.247436	-0.56733	-0.348118	-0.21378	-0.244108	-0.437825	-0.942493
YBR049C	REB1	termination of RNA polymerase I transcription; regulation of transcription from RNA polymerase II promoter; regulation of transcription, DNA-dependent; transcription, DNA-dependent	DNA binding; chromatin binding; sequence-specific DNA binding	nucleus; nucleoplasm	-0.303342	0.268241	-0.492455	-0.7557	-0.228961	0.162237	-0.142531	-0.319755	0.0697126	-0.305188	-0.159068	-0.153292	0.0664927	-0.0858104	0.00758447	-0.354628	-0.247819	-0.278852	-0.15783	0.461107	-0.203212	-0.160012	-0.519777	-0.172422	0.0351712	-0.340634	-0.465206	-0.474003
YBR050C	REG2	negative regulation of transcription from RNA polymerase II promoter	protein phosphatase type 1 regulator activity	protein phosphatase type 1 complex	-0.328625	-2.48289	3.54247	5.08927	0.278434	-1.47196	0.510144	0.0531736	-1.01568	0.206079	0.28609	-0.0273568	-0.0798724	0.135168	-0.807006	-0.659827	-1.04714	-0.832142	-1.50799	-1.11019	0.427547	-1.02645	-0.37844	-1.11445	-1.06801	-0.247214	-1.29372	-0.692702
YBR052C	RFS1	biological_process; oxidation-reduction process	molecular_function; FMN binding; oxidoreductase activity	membrane; membrane raft; cytoplasm	0.281073	-0.80466	1.54767	1.46279	0.317148	-0.366773	0.111015	0.128563	0.219691	0.475075	0.242428	0.827165	-0.0497495	0.273083	0.349993	0.567116	0.66514	1.01804	1.37963	1.63127	0.58323	0.334271	0.76205	1.50845	1.98333	2.33098	2.45861	2.89145
YBR053C	YBR053C	biological_process	molecular_function	cellular_component	-0.250955	-1.2563	1.32459	1.51621	0.163962	-0.680301	-0.308267	0.0658032	0.313996	0.284826	0.386262	0.7787	0.18344	-0.130765	-0.151242	0.296764	0.373342	0.84256	1.21646	1.19684	-0.0511484	-0.0358005	0.284265	0.789887	0.990882	1.36878	1.1733	1.45751
YBR054W	YRO2	ion transport; biological_process	molecular_function; ion channel activity	membrane; integral to membrane; mitochondrion; cellular bud	-0.0576245	-0.0615996	-0.403725	-0.85669	-0.443668	-0.442184	-0.146071	0.171539	0.133681	0.210568	-0.2406	0.997491	0.437356	0.451393	0.167805	0.698959	0.227755	0.476477	1.35904	1.27727	0.410455	0.803034	1.06949	0.885648	0.632458	0.50026	1.3175	2.39911
YBR055C	PRP6	RNA processing; mRNA processing; mRNA splicing, via spliceosome; RNA splicing	molecular_function	nucleus; spliceosomal complex; intracellular; U4/U6 x U5 tri-snRNP complex	-0.240445	0.1371	-0.931926	-0.883506	-0.337003	-0.0761236	-0.198848	-0.13295	-0.260093	-0.0986263	-0.156891	-0.238889	-0.103413	0.0214865	-0.0951402	-0.191753	-0.366936	-0.239314	-0.508465	-0.409574	0.201039	-0.0946544	-0.181108	-0.194846	-0.360191	-0.610936	-0.531522	-0.165626
YBR056W	YBR056W	metabolic process; carbohydrate metabolic process; biological_process	molecular_function; hydrolase activity; catalytic activity; hydrolase activity, acting on glycosyl bonds	mitochondrial intermembrane space; cytoplasm	0.108802	-0.873391	1.29745	1.5258	0.245834	-0.423099	-0.38976	-0.126461	0.389713	0.184504	0.166998	0.943032	-0.281733	-0.162819	0.135397	0.245643	0.274206	0.921534	0.814861	1.32066	-0.122543	-0.199938	0.317991	0.726075	1.22437	1.63563	1.52128	1.94217
YBR057C	MUM2	premeiotic DNA replication; meiosis; negative regulation of pseudohyphal growth; mRNA methylation	protein binding	MIS complex; cytoplasm	0.0726021	-0.703319	0.654429	0.569304	0.246088	-0.275813	0.112493	0.0071015	0.0826533	0.424458	0.0274328	0.185358	-0.140039	0.11455	0.0521684	-0.0493126	-0.273001	0.317827	0.106765	-0.35688	-0.019263	-0.330343	0.0456145	-0.0860795	-0.129158	0.233025	0.0600988	-0.0781174
YBR058C	UBP14	proteolysis; ubiquitin-dependent protein catabolic process; proteasomal ubiquitin-dependent protein catabolic process; negative regulation of gluconeogenesis	ubiquitin-specific protease activity; peptidase activity; ubiquitin thiolesterase activity; metal ion binding; cysteine-type peptidase activity; hydrolase activity; zinc ion binding; omega peptidase activity	nucleus; cytoplasm	-0.151387	-0.312662	0.295806	0.176465	0.047713	0.448534	0.273878	-0.176842	-0.277655	-0.096757	-0.146609	-0.199137	0.191829	-0.0452518	-0.157282	-0.0587583	-0.572564	-0.29024	-0.516004	-0.305468	0.412008	0.0758001	-0.0958901	-0.0652352	0.169302	-0.283262	-0.561035	-0.174586
YBR058C-A	TSC3	sphingolipid biosynthetic process; 3-keto-sphinganine metabolic process	enzyme activator activity	membrane; endoplasmic reticulum; SPOTS complex; integral to membrane; endoplasmic reticulum membrane	0.136334	-0.209681	0.600832	0.532739	0.171221	-0.0153602	-0.171299	-0.00466744	-0.550793	-0.223222	-0.669839	-0.202169	-0.11417	0.609367	0.596066	0.637357	0.933768	0.240021	0.281055	0.0434485	-0.00835186	0.829601	1.2692	0.432049	-0.0722648	1.10359	1.15489	0.160328
YBR059C	AKL1	phosphorylation; actin cytoskeleton organization; regulation of endocytosis; protein phosphorylation	protein serine/threonine kinase activity; ATP binding; kinase activity; nucleotide binding; protein kinase activity; transferase activity; transferase activity, transferring phosphorus-containing groups	cytoplasm; cellular bud neck	0.0795889	-0.404923	0.510104	0.927924	-0.0581061	0.189075	0.00985529	0.0534467	0.40752	0.0916394	0.282587	0.347307	0.201392	0.147239	0.411557	0.0674622	0.294259	0.376906	0.576664	0.867558	0.146857	0.172472	0.375044	0.518062	0.708067	0.281539	0.462761	0.682941
YBR060C	ORC2	chromatin silencing at silent mating-type cassette; pre-replicative complex assembly involved in nuclear cell cycle DNA replication; DNA replication; DNA replication initiation; histone H3-K4 methylation; chromatin silencing at telomere	DNA replication origin binding; DNA binding; chromatin binding	DNA replication preinitiation complex; origin recognition complex; nucleus; nuclear origin of replication recognition complex; nuclear pre-replicative complex	-0.121635	0.420355	-0.599756	-0.509265	0.0317489	0.0868849	-0.131767	-0.112749	-0.170515	-0.301145	-0.0989132	-0.178382	-0.088887	0.0583578	-0.190441	-0.267787	-0.409386	-0.276004	-0.25042	-0.229619	-0.027432	-0.17114	-0.204937	-0.228348	-0.240131	-0.416343	-0.57782	-0.433124
YBR061C	TRM7	RNA methylation; cytoplasmic translation; tRNA methylation; methylation; tRNA processing	methyltransferase activity; tRNA methyltransferase activity; transferase activity	cytoplasm	0.00791635	1.1404	-1.8674	-2.46453	0.191921	0.0964263	0.0210043	-0.260402	-0.562622	-0.237189	-0.387732	-0.818679	-0.059058	-0.144635	-0.5883	-0.327076	-0.604707	-0.986164	-1.02258	-1.28916	0.0778228	-0.0472694	-0.2156	-0.461042	-0.571212	-1.3744	-1.21884	-0.837126
YBR062C	YBR062C	biological_process	molecular_function; metal ion binding; zinc ion binding	cellular_component	0.169105	0.34036	0.10231	0.0439907	0.268483	-0.0786082	0.0963967	0.234719	0.367867	0.379015	0.0945282	0.540384	-0.196128	0.644139	0.781475	0.971196	1.27923	0.879171	0.643881	0.6633	-0.135779	0.417673	0.715365	0.242295	-0.0768014	0.990212	0.943853	0.539626
YBR063C	YBR063C	biological_process	molecular_function	membrane; cellular_component; integral to membrane	-0.387189	-0.138963	-0.0383232	-0.370456	-0.527567	0.388183	-0.212809	-0.385878	-0.117403	-0.529214	-0.299647	-0.448668	0.0365463	-0.505232	-0.397362	-0.420098	-0.320957	-0.735351	-0.46898	-0.293589	-0.0894964	-0.101215	-0.668143	-0.309479	-0.0434292	-0.325994	-0.617682	0.101165
YBR065C	ECM2	mRNA processing; mRNA splicing, via spliceosome; RNA splicing	molecular_function; RNA binding	nucleus; spliceosomal complex	-0.0859214	0.315179	0.580932	0.784693	0.0448554	0.433857	-0.47699	-0.131007	-0.0076539	-0.297198	-0.29097	-0.0983378	-0.0724883	0.116867	0.152926	-0.0527267	-0.211995	-0.515181	-0.221546	-0.121895	0.224806	-0.144495	0.15652	-0.312387	-0.0226486	-0.188489	0.172107	0.161877
YBR066C	NRG2	pseudohyphal growth; negative regulation of cellular hyperosmotic salinity response by negative regulation of transcription from RNA polymerase II promoter; regulation of transcription, DNA-dependent; biofilm formation; transcription, DNA-dependent; negative regulation of transcription from RNA polymerase II promoter by glucose; negative regulation of invasive growth in response to glucose limita…	DNA binding; metal ion binding; sequence-specific DNA binding; nucleic acid binding	nucleus	0.199063	0.655536	-1.07656	-1.66039	0.212859	-0.187237	-0.262318	-0.0786722	-0.243605	-0.193543	-0.277419	-0.161005	0.0365725	0.0110903	-0.0887419	-0.256057	0.642851	0.454132	0.387608	0.0378828	0.212018	0.397807	0.535957	-0.0387264	0.360728	0.679564	0.511948	0.66554
YBR067C	TIP1	fungal-type cell wall organization; response to stress	structural constituent of cell wall; hydrolase activity; lipase activity	membrane; fungal-type cell wall; cell wall; extracellular region; anchored to membrane	-0.252579	-0.245041	-0.042237	0.638477	-0.0718662	-0.100569	0.225337	0.538078	0.169163	0.269075	0.485842	-0.0582885	0.0490709	-0.0290352	0.0386073	0.285098	-0.260788	0.0280175	0.0748165	-0.508188	0.292113	-0.0661654	0.331771	0.219596	0.0903405	-0.244179	-0.0423119	1.45214
YBR068C	BAP2	transport; transmembrane transport; amino acid transport; amino acid transmembrane transport	amino acid transmembrane transporter activity	membrane; integral to membrane; plasma membrane	0.0918418	-0.482006	0.547342	0.710569	0.0844448	0.514301	-0.0144655	-0.26909	-0.266608	-0.377249	-0.203698	-0.2395	0.142658	-0.0140246	-0.0952363	0.0622601	0.626662	0.265322	0.479642	0.761565	0.23354	0.394025	0.148902	0.266688	-0.110745	0.35784	0.219234	0.546117
YBR069C	TAT1	tyrosine transport; transport; amino acid transport; transmembrane transport; amino acid transmembrane transport; tryptophan transport	low-affinity tryptophan transmembrane transporter activity; amino acid transmembrane transporter activity	membrane; integral to membrane; plasma membrane	0.020935	0.358323	-0.619884	-0.988913	0.148753	0.618591	0.26471	0.204028	-0.253439	-0.232349	-0.308667	-0.512311	0.189181	0.277683	-0.0629406	0.0397694	-0.109249	-0.704664	-0.914786	-1.18448	0.144032	0.458098	-0.0062195	-0.762606	-1.4926	-1.65049	-1.99338	-2.30853
YBR070C	ALG14	dolichol-linked oligosaccharide biosynthetic process	protein anchor; N-acetylglucosaminyldiphosphodolichol N-acetylglucosaminyltransferase activity	membrane; nuclear membrane; nuclear outer membrane-endoplasmic reticulum membrane network; nucleus; endoplasmic reticulum; UDP-N-acetylglucosamine transferase complex; intrinsic to endoplasmic reticulum membrane; integral to endoplasmic reticulum membrane; integral to membrane; endoplasmic reticulum membrane	-0.0150005	0.426606	-0.0380172	-0.752275	0.424022	0.179203	-0.430458	-0.0687031	-0.37305	-0.02201	0.0194938	0.217209	0.150862	0.108315	-0.0616222	0.392648	0.312907	0.191576	0.410334	0.245537	0.0467126	0.107976	0.26184	0.504514	0.0368451	0.332242	0.437814	-0.0371121
YBR071W	YBR071W	biological_process	molecular_function	cellular bud neck; cytoplasm	0.134892	0.449214	-0.475929	-0.741717	0.151725	-0.356553	-0.184642	-0.0191728	0.308838	0.55248	0.312375	0.501861	0.193201	0.0375693	0.326103	0.151905	0.152636	0.226893	0.163568	0.248954	-0.0757465	-0.124195	-0.344413	-0.676954	-0.384971	-0.647	-0.696356	-1.13871
YBR072W	HSP26	protein folding; response to stress	mRNA binding; unfolded protein binding	nucleus; cytoplasm	0.171381	0.498778	0.116125	0.787574	-0.25252	-0.290546	-0.789581	-0.891848	-0.46673	-0.538271	-0.61683	0.684882	-0.253606	-0.560627	-0.560827	0.462156	0.168738	0.913471	2.38606	3.81307	-0.0704357	-1.19437	1.01721	1.47239	1.41063	2.29668	2.59232	3.35291
YBR073W	RDH54	meiotic sister chromatid segregation; DNA repair; DNA duplex unwinding; DNA geometric change; meiosis; reciprocal meiotic recombination; heteroduplex formation; DNA recombination; response to DNA damage stimulus	DNA translocase activity; DNA binding; ATP binding; isomerase activity; helicase activity; DNA topoisomerase activity; double-stranded DNA binding; nucleic acid binding; hydrolase activity; nucleotide binding; DNA-dependent ATPase activity	nucleus	-0.0329039	0.869569	-1.75065	-2.29888	0.0773534	-0.175115	-0.24716	-0.298688	0.0459114	0.0826079	0.103265	0.0327104	-0.0377855	-0.233208	-0.188594	-0.0249026	-0.321199	-0.0912135	-0.323464	-0.421559	0.043486	-0.274244	-0.623269	-0.317693	-0.373911	-0.550902	-0.75255	-0.806765
YBR074W	PFF1	proteolysis; biological_process	molecular_function; hydrolase activity; metallopeptidase activity; peptidase activity	membrane; fungal-type vacuole membrane; integral to membrane	0.250687	2.08848	-1.23017	-1.26135	-0.104205	1.07981	-0.0115737	-0.521713	-0.00206037	-0.151128	-0.329523	0.0243363	0.478958	0.393893	0.672302	0.166671	0.669896	0.317548	-0.44593	0.548267	-0.167486	0.866823	-0.097701	-0.468532	-0.72814	-0.128571	0.037157	-0.204454
YBR074W	PFF1	proteolysis; biological_process	molecular_function; hydrolase activity; metallopeptidase activity; peptidase activity	membrane; fungal-type vacuole membrane; integral to membrane	0.132116	1.20206	-1.29296	-2.03306	-0.424366	0.583118	0.0346126	-0.660065	0.140263	-0.165793	-0.140751	0.239508	0.345459	0.0995776	0.495305	0.0413119	0.626737	0.212817	-0.145914	0.929588	-0.0189258	0.376293	-0.34131	-0.98379	-0.207172	-0.292416	-0.341885	-0.298685
YBR077C	SLM4	transport; microautophagy; signal transduction; autophagy; protein transport	phosphatidylinositol-3,4-bisphosphate binding	membrane; fungal-type vacuole membrane; late endosome membrane; cytoplasm; vacuole; vacuolar membrane; EGO complex; integral to membrane	0.138858	-0.12589	0.768771	0.99651	0.23553	-0.565944	0.0974681	0.197259	0.0957588	0.389918	-0.0457818	-0.1535	0.123159	0.252121	-0.142492	-0.266968	0.309648	0.290942	0.241004	-0.139639	0.40766	-0.0808778	0.411637	0.382954	-0.0940996	-0.284791	-0.0427792	0.186497
YBR078W	ECM33	fungal-type cell wall organization	molecular_function	fungal-type cell wall; membrane; cell wall; extracellular region; mitochondrion; anchored to membrane; plasma membrane	-0.0154855	0.776987	-1.5769	-1.98304	0.0492229	0.0315069	0.0275854	0.307752	0.00528891	-0.0696664	-0.0243823	0.0638461	0.422563	0.144652	-0.0877312	0.340741	0.340843	-0.125449	0.0529977	0.178356	0.158889	0.0499248	-0.0890044	0.144118	-0.0867882	-0.0536563	-0.28872	-0.287738
YBR079C	RPG1	translational initiation; regulation of translational initiation; translation reinitiation; translation; formation of translation preinitiation complex	translation initiation factor activity	cytoplasmic stress granule; eukaryotic 43S preinitiation complex; incipient cellular bud site; eukaryotic 48S preinitiation complex; eukaryotic translation initiation factor 3 complex; cytoplasm	-0.173168	0.48569	-1.4384	-1.47795	-0.261906	0.34416	-0.0468431	-0.226359	0.0910958	-0.233251	-0.00862264	-0.51614	-0.117372	-0.0929846	-0.398	-0.324457	-0.491184	-0.135034	-0.488611	-0.199953	-0.0968004	-0.238685	-0.487338	-0.606013	-0.264491	-1.33277	-1.19448	-0.651661
YBR080C	SEC18	transport; SNARE complex disassembly; Golgi vesicle docking; vacuole fusion, non-autophagic; inter-Golgi cisterna vesicle-mediated transport; vesicle-mediated transport; vesicle fusion with Golgi apparatus; Golgi to plasma membrane protein transport; protein transport; autophagic vacuole assembly	ATP binding; nucleotide binding; nucleoside-triphosphatase activity; ATPase activity	Golgi apparatus; mating projection tip; cytoplasm	0.0098727	0.697795	-0.331136	-0.320383	-0.0496235	0.22162	0.00914496	0.114956	0.50482	0.161609	0.320377	0.214355	0.282921	0.171346	0.0440725	-0.0350067	-0.162133	0.109967	0.0260835	0.502291	0.447361	0.185153	-0.0456108	0.160558	0.287414	-0.12702	-0.234055	0.238438
YBR081C	SPT7	conjugation with cellular fusion; regulation of transcription, DNA-dependent; transcription, DNA-dependent; histone acetylation; protein complex assembly; chromatin modification	structural molecule activity	SAGA complex; nucleus; SLIK (SAGA-like) complex; mitochondrion	-0.0474963	0.277895	-0.46706	-0.663785	0.00907852	0.00349818	0.0124869	-0.0724265	-0.0761288	0.0541842	-0.158584	-0.214287	-0.068506	-0.221086	-0.0389824	-0.165634	-0.356507	-0.245211	-0.344428	-0.142238	-0.0811889	-0.335444	-0.439753	-0.189092	-0.176336	-0.569724	-0.347258	-0.403151
YBR082C	UBC4	protein monoubiquitination; protein ubiquitination; response to stress; ubiquitin-dependent protein catabolic process via the multivesicular body sorting pathway; protein polyubiquitination	ubiquitin binding; ATP binding; nucleotide binding; acid-amino acid ligase activity; ligase activity; ubiquitin-protein ligase activity	proteasome complex	0.0332628	-0.431569	-0.108592	0.115455	0.00256749	-0.0988705	0.00135722	-0.103719	-0.0125516	-0.128572	-0.0590632	0.0309866	-0.187073	-0.0811182	-0.125792	-0.35449	-0.0688665	-0.0548256	0.0745106	0.057575	-0.0306324	-0.176741	-0.0700392	0.220663	-0.046561	-0.0420809	-0.0696236	0.0128308
YBR083W	TEC1	invasive growth in response to glucose limitation; pseudohyphal growth; regulation of transcription, DNA-dependent; positive regulation of transposition, RNA-mediated; positive regulation of transcription from RNA polymerase II promoter in response to stress; transcription, DNA-dependent; chronological cell aging	RNA polymerase II core promoter proximal region sequence-specific DNA binding; DNA binding; sequence-specific DNA binding; RNA polymerase II core promoter proximal region sequence-specific DNA binding transcription factor activity involved in positive regulation of transcription; RNA polymerase II transcription factor recruiting transcription factor activity; sequence-specific DNA binding transcr…	nucleus	-0.0561637	-0.602941	0.240583	0.288161	-0.172828	-0.576136	-0.762063	-0.527836	0.106314	-0.105195	-0.093424	0.0135489	-0.0339536	-1.19978	-1.02017	-1.09946	-0.836368	-0.579234	-0.619791	0.32693	0.344223	-1.27624	-1.70307	-1.71769	-1.42957	-1.58153	-1.22132	-0.942426
YBR084C-A	RPL19A	cytoplasmic translation; translation	structural constituent of ribosome	ribosome; ribonucleoprotein complex; intracellular; cytosolic large ribosomal subunit; cytoplasm	-0.0890265	0.0104488	-0.70561	-1.10522	0.25038	-0.266421	-0.0322929	-0.0663932	0.0784695	0.0985571	0.158632	-0.0530633	-0.154731	0.0996457	-0.185681	-0.384887	0.0392449	-0.0505078	-0.125762	-0.695275	0.595406	0.176773	0.146876	0.428286	0.29948	0.24725	-0.0184613	0.115659
YBR084W	MIS1	cellular amino acid biosynthetic process; metabolic process; folic acid biosynthetic process; one-carbon metabolic process; nucleobase-containing compound metabolic process; oxidation-reduction process; folic acid-containing compound biosynthetic process; histidine biosynthetic process; purine nucleotide biosynthetic process; tetrahydrofolate interconversion; methionine biosynthetic process	ATP binding; methenyltetrahydrofolate cyclohydrolase activity; catalytic activity; ligase activity; methylenetetrahydrofolate dehydrogenase (NADP+) activity; hydrolase activity; nucleotide binding; formate-tetrahydrofolate ligase activity; oxidoreductase activity	mitochondrion	0.0201709	0.658842	-1.30732	-1.91254	-0.014734	0.604765	0.0483577	-0.0158419	0.0103682	-0.268233	-0.218501	-0.56043	0.425885	0.254872	-0.050342	-0.0254749	0.153873	-0.106567	-0.391863	-0.260818	0.214709	0.274293	-0.39311	-0.146715	-0.265092	-0.679413	-1.04822	-1.01099
YBR085C-A	YBR085C-A	biological_process	molecular_function	nucleus; cytoplasm	-0.128209	-0.7078	0.680001	0.96202	-0.778529	-0.14184	0.121465	0.0614234	-0.201356	-0.0133733	-0.199188	0.18414	0.0286698	0.212747	0.552917	0.234311	0.802324	0.892879	1.03551	0.958736	-0.203458	0.16647	0.889725	1.13713	1.66284	1.6903	1.99279	1.39692
YBR085W	AAC3	transport; transmembrane transport; anaerobic respiration; heme transport	ATP:ADP antiporter activity; transporter activity	membrane; mitochondrial inner membrane; integral to membrane; mitochondrion	-0.0667606	0.393023	-0.704475	-1.50355	0.0969876	-0.0111571	-0.00226749	-0.290256	-0.397766	-0.0799792	-0.16151	-0.19433	-0.297899	-0.415304	-0.535846	-0.317534	-0.585258	-0.592922	-0.619986	-0.966317	0.00362045	0.184777	-0.46837	-0.736225	-0.732448	-0.396462	-0.76349	-0.872856
YBR086C	IST2	endoplasmic reticulum membrane organization; regulation of phosphatidylinositol dephosphorylation	lipid binding	cellular bud membrane; membrane; cortical endoplasmic reticulum; integral to membrane; plasma membrane	-0.11558	0.0381884	-0.391697	0.232727	-0.129707	0.210922	-0.102925	-0.00130419	-0.101381	-0.380722	-0.197291	-0.064916	0.0928519	0.256949	0.0728559	0.0970825	0.535249	0.107293	0.319429	0.835106	-0.0855034	0.260273	0.274078	0.314266	0.231086	0.736803	0.478495	0.640891
YBR087W	RFC5	leading strand elongation; sister chromatid cohesion; DNA replication; cell cycle	DNA binding; DNA clamp loader activity; ATP binding; nucleotide binding; nucleoside-triphosphatase activity	DNA replication factor C complex; nucleus; Ctf18 RFC-like complex; Elg1 RFC-like complex; Rad17 RFC-like complex	-0.136074	-0.429326	0.317238	-0.212412	-0.152259	-0.126057	0.092912	0.105805	0.0488674	-0.106042	0.0481852	0.067841	-0.0388203	-0.0260136	-0.495307	-0.336741	-0.263779	-0.465288	-0.3351	-0.581789	-0.0137221	0.297864	-0.0621856	-0.0540999	-0.139866	-0.501545	-0.118435	0.0868352
YBR088C	POL30	leading strand elongation; chromatin silencing at silent mating-type cassette; DNA repair; DNA replication; mismatch repair; regulation of DNA replication; chromatin silencing at telomere; nucleotide-excision repair; meiotic mismatch repair; lagging strand elongation; response to DNA damage stimulus; mitotic sister chromatid cohesion; postreplication repair	DNA binding; DNA polymerase processivity factor activity	nucleus; PCNA complex; replication fork	-0.0968746	1.66352	-2.857	-3.10303	-0.0414098	-0.549293	-0.373605	-0.114159	-0.276007	0.00801495	0.0457923	0.122924	-0.189874	-0.301499	-0.757532	-0.666961	-0.536111	-0.339654	-0.277015	-0.858743	0.386983	0.0691497	-0.332143	-0.0319133	-0.148606	-0.348299	-0.548961	-0.377345
YBR089C-A	NHP6B	DNA repair; chromatin remodeling; regulation of transcription, DNA-dependent; transcription, DNA-dependent; response to DNA damage stimulus; RNA polymerase III transcriptional preinitiation complex assembly; transcription from RNA polymerase II promoter	nucleosome binding; DNA binding; sequence-specific DNA binding; DNA binding, bending	nucleus; chromosome	0.239992	-0.584498	1.30952	1.58066	0.14732	-0.00135394	0.08964	0.241701	0.160929	0.100466	0.0567552	0.259904	0.171516	0.375923	0.471441	0.59398	0.707442	0.400148	0.47319	0.551713	-0.00278481	0.191507	0.428586	0.51326	0.383195	0.682379	0.760954	0.128198
YBR089W	YBR089W				0.37543		-1.72387		1.9421			-0.438809	1.6452	0.597575	0.977974	1.39637	-0.409775	1.17254	-0.387117	0.924193		-1.17603	-0.280888	-0.0566302	0.722864	0.215297	0.0820495	-0.330581	-0.802699	0.0314882	-0.369158	-0.301137
YBR090C	YBR090C	biological_process	molecular_function	membrane; nucleus; integral to membrane; cytoplasm	-0.693581		2.16631	0.946771	-0.0567613	-0.167389	-0.411982	0.479132	0.076857	0.544848	-0.363963	0.659071	-0.908628	-0.0211603	-0.322877	-0.914096	0.730486	0.394822	0.0581175	-0.0442364	-0.275091	-0.494298	-0.587498	0.74978	0.175327	0.908049	1.00019	0.576061
YBR091C	TIM12	transport; protein transport; protein import into mitochondrial inner membrane	metal ion binding; protein channel activity; phospholipid binding	membrane; mitochondrial inner membrane; integral to membrane; mitochondrial inner membrane protein insertion complex; mitochondrion	0.0765158	0.737438	-0.45653	-0.394746	-0.0639584	0.0697443	-0.0373214	-0.338263	-0.258055	-0.169214	-0.363575	-0.140518	-0.196523	-0.0624464	-0.191248	-0.238379	0.0740173	-0.234057	-0.565157	-0.456211	-0.348225	0.0309092	-0.0430312	-0.246896	-0.18611	-0.136074	-0.311457	-0.659847
YBR092C	PHO3	thiamine-containing compound metabolic process; dephosphorylation; phosphate-containing compound metabolic process	hydrolase activity; acid phosphatase activity; phosphatase activity	cell wall-bounded periplasmic space	0.0644489	0.848418	-1.93294	-2.23188	0.170864	0.149023	0.0918674	0.100071	-0.0581093	-0.10018	-0.0615695	-0.466766	0.131635	0.130772	0.0851734	0.391338	0.127853	-0.192288	-0.176234	-0.582765	0.531779	0.437552	0.231769	0.117206	-0.070443	-0.190554	-0.5225	-0.85441
YBR093C	PHO5	cellular response to phosphate starvation; regulation of cell size; dephosphorylation; phosphate-containing compound metabolic process	nucleoside-triphosphate diphosphatase activity; hydrolase activity; nucleoside-triphosphatase activity; acid phosphatase activity; phosphatase activity	fungal-type cell wall; extracellular region	0.360007	-0.141627	0.59692	0.880122	0.244962	0.0962794	0.142494	-0.0129017	-0.346071	-0.200012	-0.343054	-0.104557	0.670592	-0.0846644	0.0427944	-0.0968287	0.579601	-0.549491	-0.0728381	0.589525	0.819273	0.435143	0.0926538	-0.289686	-0.870982	-0.246964	0.361698	-0.341263
YBR094W	PBY1	cellular protein modification process; biological_process; nuclear-transcribed mRNA catabolic process	molecular_function; hydrolase activity; ligase activity; tubulin-tyrosine ligase activity	cytoplasmic mRNA processing body; cytoplasm	-0.0702469	0.354434	-0.31687	-0.476723	-0.308503	0.501259	-0.0672948	-0.344684	-0.342813	-0.468447	-0.0290527	-0.210283	0.617063	0.144289	0.323781	0.0508515	-0.0280901	-0.0239196	-0.0817615	0.414321	0.411155	0.330135	-0.179342	0.164644	0.246066	-0.134168	0.0508561	0.325873
YBR095C	RXT2	negative regulation of chromatin silencing at silent mating-type cassette; conjugation with cellular fusion; regulation of transcription, DNA-dependent; transcription, DNA-dependent; negative regulation of transcription from RNA polymerase II promoter; invasive growth in response to glucose limitation; negative regulation of chromatin silencing at rDNA; negative regulation of chromatin silencing …	histone deacetylase activity	nucleus; cytosol; Rpd3L complex; Rpd3L-Expanded complex	0.0995369	-0.180776	0.895313	1.107	0.174323	-0.159717	-0.00435915	0.0429057	-0.188283	-0.21689	-0.0741856	-0.368499	-0.162389	-0.0166394	-0.0093224	-0.191824	-0.339155	-0.390303	-0.579663	-0.632773	-0.070577	-0.215941	-0.398873	-0.0307197	-0.445294	-0.472234	-0.567605	-0.664479
YBR096W	YBR096W	biological_process	molecular_function	endoplasmic reticulum	-0.271271	0.0958209	-0.519908	-0.258615	0.020671	-0.77848	-0.28362	0.0964789	-0.597511	0.0293723	-0.0543199	0.0336251	-0.254325	0.0999558	-0.410965	-0.045683	0.250934	-0.20685	-0.055796	-0.437504	0.227349	0.0451033	0.578338	0.463934	-0.255912	0.586802	0.792247	0.68769
YBR097W	VPS15	transport; inositol lipid-mediated signaling; phosphorylation; peroxisome degradation; protein phosphorylation; late endosome to vacuole transport; protein retention in Golgi apparatus; positive regulation of transcription elongation from RNA polymerase II promoter; protein targeting to vacuole; vacuole inheritance; protein transport; macroautophagy	ubiquitin binding; ATP binding; protein serine/threonine kinase activity; kinase activity; nucleotide binding; protein kinase activity; transferase activity; transferase activity, transferring phosphorus-containing groups	membrane; endosome membrane; phosphatidylinositol 3-kinase complex II; nuclear pore; nucleus-vacuole junction; endosome; phosphatidylinositol 3-kinase complex I; Golgi apparatus; mitochondrion	-0.137277	-0.126581	-0.277549	0.37029	-0.135076	-0.13572	-0.270307	-0.205107	-0.133495	-0.0273546	-0.112655	-0.117604	0.252163	-0.419762	0.208662	0.0607356	-0.105052	0.0338706	-0.0847577	-0.144624	-0.118832	-0.192952	0.036598	-0.412371	0.0737069	0.0902562	-0.117401	0.230053
YBR098W	MMS4	resolution of meiotic recombination intermediates; DNA repair; meiosis; reciprocal meiotic recombination; nucleic acid phosphodiester bond hydrolysis; response to DNA damage stimulus; DNA recombination; regulation of reciprocal meiotic recombination; DNA topological change	DNA binding; metal ion binding; transcription coactivator activity; hydrolase activity; endonuclease activity; crossover junction endodeoxyribonuclease activity; nuclease activity	nucleus; Holliday junction resolvase complex	-0.353738	-0.339289	-0.109633	0.398134	-0.516825	0.144414	-0.457783	-0.0126813	-0.417804	0.0103845	0.261767	0.243492	0.155896	0.183131	0.077527	0.0144435	-0.45178	-0.0317995	0.200906	0.16654	-0.53295	0.412187	0.323121	0.0525362	0.382456	0.0448792	0.321843	0.139315
YBR098W	MMS4	resolution of meiotic recombination intermediates; DNA repair; meiosis; reciprocal meiotic recombination; nucleic acid phosphodiester bond hydrolysis; response to DNA damage stimulus; DNA recombination; regulation of reciprocal meiotic recombination; DNA topological change	DNA binding; metal ion binding; transcription coactivator activity; hydrolase activity; endonuclease activity; crossover junction endodeoxyribonuclease activity; nuclease activity	nucleus; Holliday junction resolvase complex	-0.472096	0.296305	-0.357617	0.179626	-0.525314	-0.0528082	0.214768	-0.58567	0.0261316	0.0349257	0.252726	-0.312064	0.413572	-0.25582	0.44255	-0.274293	-0.21414	0.47672	-0.303028	0.783218	-0.251107	-0.31178	0.280071	-0.155468	0.0319252	-0.666267	-0.261185	-0.255998
YBR099C	YBR099C				-0.00103772	1.12764	-1.50208	-1.17673	-0.225328	0.0439514	0.0111358	-0.341452	0.0237473	0.188337	-0.0228286	0.156515	-0.0708199	0.423125	-0.259415	-0.366119	-0.246507	-0.123738	0.00367342	-0.55259	-0.141373	-0.135797	0.198545	-0.270794	-0.297535	-0.111802	-0.27317	-0.826839
YBR101C	FES1	cytoplasm-associated proteasomal ubiquitin-dependent protein catabolic process; cytoplasmic translation; regulation of translation	adenyl-nucleotide exchange factor activity	cytosol; cytoplasm; cytosolic ribosome	0.0743098	-0.654807	0.658778	0.666582	0.280467	0.287813	0.65801	0.380507	0.114501	0.229062	0.237414	0.328666	-0.0129924	0.53254	-0.0540522	-0.524408	-0.44721	-0.42139	-0.221903	-0.812835	0.0403251	0.431855	0.407607	0.0406987	-0.205389	-0.039073	-0.0173862	-0.383142
YBR102C	EXO84	transport; exocyst assembly; exocyst localization; spliceosomal complex assembly; protein transport; Golgi to plasma membrane transport; exocytosis; vesicle tethering involved in exocytosis	molecular_function	exocyst; cytoplasmic vesicle; transport vesicle; cellular bud tip; incipient cellular bud site; mating projection tip; cellular bud neck; cellular bud	-0.0553924	0.852106	-0.658717	-0.742144	-0.20458	0.627542	0.592318	0.128296	0.203878	0.0566175	0.0432444	-0.0872956	0.302578	0.0485031	0.247555	0.287688	-0.0487316	-0.0394369	-0.412676	0.366793	0.0854675	0.0992859	0.0757695	0.315673	0.16889	0.0121756	-0.0864415	0.0810894
YBR103W	SIF2	negative regulation of meiosis; regulation of transcription, DNA-dependent; negative regulation of chromatin silencing at telomere; positive regulation of stress-activated MAPK cascade; histone deacetylation; chromatin modification	molecular_function	nucleus; Set3 complex; Rpd3L-Expanded complex	-0.162215	0.122424	-0.116497	-0.148901	0.0735212	-0.216828	-0.00852482	-0.112947	-0.137954	-0.111412	0.0294411	0.0731644	-0.0645803	0.131809	0.0770692	-0.0266689	-0.169998	0.0164573	-0.0508667	0.029983	-0.0458518	-0.0918603	-0.179858	-0.197384	-0.193118	-0.302099	-0.298043	-0.353022
YBR104W	YMC2	transport; transmembrane transport; mitochondrial transport	organic acid transmembrane transporter activity	membrane; integral to membrane; mitochondrial inner membrane; mitochondrion	-0.0725081	1.30221	-2.11299	-2.63492	0.174003	0.623607	0.379984	-0.0560642	-0.0562366	0.047771	-0.162157	-0.430123	-0.206061	0.231994	-0.13412	-0.201958	0.0397069	-0.457293	-0.732477	-1.35483	0.00878085	0.351642	-0.227811	-0.379888	-0.766335	-0.674736	-0.882516	-1.30818
YBR105C	VID24	transport; negative regulation of gluconeogenesis; vesicle-mediated transport; proteasomal ubiquitin-dependent protein catabolic process; vacuolar protein catabolic process; protein targeting to vacuole; vesicle fusion with vacuole; protein transport	molecular_function	membrane; cytoplasmic vesicle; extrinsic to membrane; GID complex; cytoplasmic membrane-bounded vesicle; cytoplasmic vesicle membrane	0.0313979	-0.426448	0.654954	0.105601	-0.121008	-0.530607	-1.17237	-1.23658	-0.698844	-0.791782	-0.651382	-1.11055	0.35946	-1.73345	-1.35049	-1.13099	-1.16088	-1.50657	-1.28782	0.118514	0.228554	-0.97748	-1.1395	-0.823161	-0.346242	-0.139781	-0.358842	0.342542
YBR106W	PHO88	transport; phosphate ion transport	molecular_function	membrane; integral to membrane; mitochondrion	-0.0358007	0.76299	-1.14601	-1.15699	0.0715866	0.169527	-0.00610856	0.187367	-0.110983	-0.0653693	-0.18128	-0.00613635	-0.0878405	0.231102	0.050172	0.405895	0.505388	-0.295199	-0.157759	-0.436154	-0.0558029	0.36917	0.168088	-0.110571	-0.279448	0.228739	0.0452047	-0.400313
YBR107C	IML3	meiotic sister chromatid segregation; ascospore formation; protein localization to chromosome, centromeric region; establishment of meiotic sister chromatid cohesion; mitosis; meiosis; cell division; establishment of mitotic sister chromatid cohesion; maintenance of meiotic sister chromatid cohesion; cell cycle	molecular_function	nucleus; condensed nuclear chromosome outer kinetochore; chromosome; condensed chromosome kinetochore; kinetochore; chromosome, centromeric region	0.134508	-0.652177	0.877252	1.30071	-0.136017	-0.0342758	0.234925	0.118834	0.21897	0.383083	0.157067	-0.0820341	-0.0898324	-0.193237	0.26034	0.0390488	-5.53827e-05	0.100345	0.0970627	0.117349	-0.133492	0.345428	0.457634	0.296965	0.217808	0.267074	0.0850239	0.0472105
YBR108W	AIM3	actin cortical patch assembly	molecular_function	membrane; actin cortical patch; membrane raft	-0.120985	-0.235088	0.633413	1.23371	-0.181084	0.670938	-0.162672	0.66414	0.656379	0.225966	-0.218296	0.570072	0.546416	0.126133	0.846857	-0.0688709	0.170212	0.523086	0.760642	3.14687	-0.362017	0.680498	0.779006	1.08972	-0.0391593	0.371826	0.48013	0.489147
YBR109C	CMD1	cell budding; microautophagy; NLS-bearing substrate import into nucleus; phosphatidylinositol biosynthetic process; vacuole fusion, non-autophagic; transcription factor import into nucleus; spindle pole body organization; receptor-mediated endocytosis; cytoskeleton organization; karyogamy involved in conjugation with cellular fusion	metal ion binding; protein binding; calcium ion binding; calcium-dependent protein binding	cytoskeleton; spindle pole body; mating projection tip; cellular bud tip; cellular bud neck; central plaque of spindle pole body; cytoplasm; incipient cellular bud site	-0.216392	-0.169877	-0.169315	-0.336423	0.237606	-0.354992	-0.010715	0.230393	0.446468	0.329486	0.374921	0.0595493	-0.0419085	0.00484902	-0.135631	-0.305467	0.0274166	0.0767812	0.00906872	-0.399489	0.0827806	-0.0343002	-0.0998135	-0.0807605	0.257392	0.213181	0.147922	0.0479813
YBR110W	ALG1	oligosaccharide-lipid intermediate biosynthetic process; protein glycosylation; biosynthetic process; protein N-linked glycosylation	beta-1,4-mannosyltransferase activity; chitobiosyldiphosphodolichol beta-mannosyltransferase activity; transferase activity, transferring glycosyl groups; transferase activity	membrane; endoplasmic reticulum; integral to membrane; endoplasmic reticulum membrane	-0.124251	-0.343276	0.201065	-0.0958998	0.0276066	-0.197026	0.052036	0.0717937	0.269238	0.144381	-0.130669	0.174684	-0.198739	-0.0319695	0.209712	0.440387	0.580567	-0.0366771	0.224942	-0.163098	-0.192238	0.0163202	0.1248	-0.0543233	-0.173728	0.496286	0.204338	-0.041077
YBR111C	YSA1	ribose phosphate metabolic process	metal ion binding; hydrolase activity; ADP-ribose diphosphatase activity	nucleus; mitochondrion; cytoplasm	0.219823	-0.181861	0.860084	0.698785	0.345012	-0.492613	0.0298787	0.148213	0.00650315	0.340263	0.177885	0.33089	0.0323458	0.0524858	0.0667964	0.135997	0.0256	0.18592	0.362758	0.370926	0.34527	0.128356	0.118591	0.658032	0.632963	0.865411	0.700517	1.36707
YBR112C	CYC8	chromatin remodeling; negative regulation of transcription from RNA polymerase II promoter during mitosis; regulation of transcription from RNA polymerase II promoter in response to osmotic stress; regulation of transcription, DNA-dependent; regulation of response to DNA damage stimulus; transcription, DNA-dependent; nucleosome positioning; negative regulation of dipeptide transport by negative r…	RNA polymerase II transcription factor binding transcription factor activity involved in positive regulation of transcription; histone deacetylase binding; RNA polymerase II transcription factor binding transcription factor activity involved in negative regulation of transcription	transcriptional repressor complex; nucleus	0.222534	-0.0661779	0.0201618	-0.0369286	0.212623	0.08773	-0.0693989	-0.126583	-0.0238172	-0.0334173	0.0263704	0.0564567	0.135608	-0.15973	-0.237061	-0.448769	-0.580384	-0.0499215	-0.241423	-0.188792	0.1422	-0.177342	-0.237398	0.0687698	0.322167	0.195937	-0.278474	-0.110328
YBR113W	YBR113W				0.479315	1.54206	-0.562821	-0.335677	0.014356	0.229095	-0.574191	-0.478265	-0.839674	-0.0466832	-0.711828	-0.264857	0.219365	-0.146759	-0.569291	-0.108839	0.0344849	0.524319	0.0307082	1.36083	-0.546559	-0.514882	0.235116	0.365464	-0.359941	-0.592163	-0.445818	-0.700647
YBR114W	RAD16	DNA repair; nucleotide-excision repair, DNA damage recognition; response to DNA damage stimulus; protein ubiquitination involved in ubiquitin-dependent protein catabolic process	DNA binding; ATP binding; helicase activity; ubiquitin-protein ligase activity; nucleic acid binding; metal ion binding; hydrolase activity; damaged DNA binding; nucleotide binding; zinc ion binding; DNA-dependent ATPase activity	nucleotide-excision repair factor 4 complex; nucleus; Cul3-RING ubiquitin ligase complex	-0.222237	0.277831	-0.0350445	-0.177623	0.241345	0.806221	-0.333776	-0.537598	-0.214433	-0.11478	-0.0973132	-0.149906	0.0176295	-0.635607	-0.770174	-0.805192	-0.766532	-0.166668	0.055676	-0.0643517	0.0475588	0.213493	0.619029	1.36591	1.64672	2.12364	1.66405	1.56606
YBR115C	LYS2	cellular amino acid biosynthetic process; metabolic process; lysine biosynthetic process; oxidation-reduction process; lysine biosynthetic process via aminoadipic acid	phosphopantetheine binding; catalytic activity; oxidoreductase activity; L-aminoadipate-semialdehyde dehydrogenase activity	cytoplasm	0.177517	0.256022	-0.896474	-1.4505	0.0581896	0.195486	0.297562	0.181121	0.560881	0.0193939	0.248344	-0.0936553	0.333637	-0.227372	-0.283419	-0.573772	-0.981838	-0.210805	-0.41558	-0.171248	0.078091	-0.157629	-0.236801	-0.282797	-0.133687	-0.511304	-0.806234	-0.565527
YBR116C	YBR116C				-0.303442	-1.7358	2.01189	1.89735	0.224097	-0.595466	-0.0499955	-0.517987	-0.301342	-0.161269	0.0659656	0.611483	-0.46701	0.52851	-0.872417	0.315787	0.759526	0.64946	2.35693	4.44389	-1.2424	-1.48981	-0.361147	1.35774	3.87148	5.33901	5.29933	6.96049
YBR117C	TKL2	pentose-phosphate shunt; metabolic process	metal ion binding; transferase activity; catalytic activity; transketolase activity	nucleus; cytoplasm	0.42271	-1.55557	2.38766	2.37116	0.273811	0.943943	0.55086	-0.835186	2.01748	0.927484	-0.240655	1.11692	0.695208	1.40216	1.2537	0.484711	2.25106	-0.107556	1.57886	4.36214	-0.455553	-1.25647	-0.458859	2.09857	3.84946	5.18032	5.42167	5.95415
YBR119W	MUD1	mRNA processing; mRNA splicing, via spliceosome; RNA splicing	RNA binding; U1 snRNA binding; nucleotide binding; snRNA binding; nucleic acid binding	U1 snRNP; U2-type prespliceosome; nucleus; spliceosomal complex; ribonucleoprotein complex	-0.0622785	-0.365808	0.395444	0.39061	-0.0694384	-0.404581	0.0247693	-0.0607861	-0.0135012	0.0202356	0.018253	0.0600057	-0.401665	-0.0462798	0.148102	-0.0148098	0.327619	-0.0724338	0.411375	-0.0640277	-0.0224618	-0.00800474	0.373377	0.388472	0.341686	0.669225	0.785107	0.68173
YBR120C	CBP6	mRNA processing; mitochondrial respiratory chain complex III assembly; positive regulation of mitochondrial translation	ribosome binding	mitochondrial ribosome; mitochondrion	-0.0713752	-0.265791	0.826343	1.18102	-0.382233	-0.532505	-0.0905765	-0.328996	-0.476506	0.00769772	-0.24939	0.051388	-0.521669	-0.402637	-0.54332	-1.31979	-0.574113	-0.509797	-0.136825	-0.11985	0.401687	0.316742	0.366181	0.364475	0.609307	-0.451315	0.447827	0.738497
YBR121C	GRS1	DNA-dependent transcription, termination; mitochondrial glycyl-tRNA aminoacylation; glycyl-tRNA aminoacylation; tRNA aminoacylation for protein translation; translation	glycine-tRNA ligase activity; ATP binding; nucleotide binding; aminoacyl-tRNA ligase activity; ligase activity	mitochondrial matrix; mitochondrion; cytoplasm	0.00479186	0.416662	-1.49952	-2.02039	0.103791	0.179091	0.158015	0.31871	0.288987	0.0434189	0.21177	-0.0407605	0.196201	0.0630903	-0.0707956	-0.174475	-0.293091	-0.162923	-0.194326	-0.328892	0.373474	0.067517	-0.152269	0.0759075	0.162964	-0.364298	-0.568106	-0.326354
YBR122C	MRPL36	mitochondrial translation	structural constituent of ribosome	ribosome; mitochondrial large ribosomal subunit; ribonucleoprotein complex; mitochondrion	0.158427	0.17372	0.434586	-0.0381069	0.382467	-0.310191	-0.0330332	-0.306296	-0.280256	0.101086	-0.101772	-0.0751541	-0.160887	0.0554766	0.183602	-0.0461068	0.0885192	-0.0929724	0.18093	-0.182134	-0.576475	0.191575	0.0401152	0.370035	-0.00442738	0.304683	0.49841	-0.0430835
YBR123C	TFC1	transcription from a RNA polymerase III hybrid type promoter; regulation of transcription, DNA-dependent; 5S class rRNA transcription from RNA polymerase III type 1 promoter; transcription, DNA-dependent; transcription from RNA polymerase III type 2 promoter	RNA polymerase III type 1 promoter sequence-specific DNA binding TFIIIB recruiting transcription factor activity; DNA binding; RNA polymerase III type 1 promoter sequence-specific DNA binding; RNA polymerase III type 2 promoter sequence-specific DNA binding TFIIIB recruiting transcription factor activity; RNA polymerase III type 2 promoter sequence-specific DNA binding; DNA binding, bending	nucleus; transcription factor TFIIIC complex	0.0870927	0.389242	-0.187059	-0.112802	0.426525	0.0636812	-0.112843	0.274137	0.0999725	0.151507	-0.264269	0.0997811	-0.0856778	-0.156939	0.172126	0.175102	-0.552614	-0.499321	-0.239484	-0.0710565	-0.261206	-0.725773	-0.237123	-0.284628	-0.346641	-0.530921	-0.336119	-0.573953
YBR125C	PTC4	protein dephosphorylation	metal ion binding; hydrolase activity; phosphoprotein phosphatase activity; catalytic activity; protein serine/threonine phosphatase activity	cytoplasm	0.0809784	-0.22945	0.363942	0.175747	-0.0127975	0.297715	-0.290533	-0.166077	0.180502	-0.280494	-0.231382	-0.0849418	-0.135598	-0.0405354	-0.205035	-0.101168	-0.566224	-0.599292	-0.505117	-0.242067	0.0689352	0.251843	-0.0834951	-0.323159	-0.90336	-0.343328	-0.661311	-0.390758
YBR126C	TPS1	trehalose biosynthetic process; response to stress; cellular carbohydrate metabolic process	transferase activity, transferring glycosyl groups; alpha,alpha-trehalose-phosphate synthase (UDP-forming) activity; transferase activity; catalytic activity	alpha,alpha-trehalose-phosphate synthase complex (UDP-forming); cytoplasm	0.118382	-0.504206	0.724872	0.709762	0.0759193	-0.330438	-0.229546	-0.0928587	0.213282	0.299421	0.163806	0.607346	-0.133333	0.0474702	0.677177	0.91901	1.56802	2.47566	2.99826	3.52482	0.0716065	0.21777	1.59671	3.16867	3.84949	3.97078	3.92265	4.13849
YBR127C	VMA2	ATP metabolic process; transport; transmembrane transport; vacuolar acidification; ion transport; ATP hydrolysis coupled proton transport; cellular calcium ion homeostasis; proton transport	hydrolase activity; ATP binding; hydrolase activity, acting on acid anhydrides, catalyzing transmembrane movement of substances; proton-transporting ATPase activity, rotational mechanism	proton-transporting two-sector ATPase complex, catalytic domain; fungal-type vacuole membrane; integral to membrane; proton-transporting V-type ATPase, V1 domain; vacuolar proton-transporting V-type ATPase, V1 domain; cytoplasm	0.245132	0.78794	-0.984455	-1.31418	-0.122319	0.318367	-0.145737	-0.216297	-0.0621182	-0.234049	-0.157925	0.00290301	0.21871	-0.0468259	0.0714088	-0.0095548	-0.314747	-0.141555	-0.271406	0.6589	0.403222	0.0125857	-0.474842	0.119159	0.381769	-0.0343869	-0.187709	0.36171
YBR128C	ATG14	transport; CVT pathway; peroxisome degradation; positive regulation of autophagy; piecemeal microautophagy of nucleus; autophagy; protein transport; macroautophagy	molecular_function	membrane; fungal-type vacuole membrane; extrinsic to membrane; vacuole; vacuolar membrane; phosphatidylinositol 3-kinase complex I; pre-autophagosomal structure; pre-autophagosomal structure membrane	-0.629739		-0.0326018	0.84772	0.9659	-1.12959	-0.463366	-0.350959	0.507006	-1.27736	0.557517	1.06822	0.433442	0.791602	-0.440064	0.0772733	0.0941228	-0.979991	1.11346	1.19406	-0.0327849	-0.496756	0.282988	0.372221	0.64674	1.73858	0.909037	1.57646
YBR129C	OPY1	biological_process	molecular_function; phospholipid binding	mitochondrion; cytoplasm	-0.679588	-0.487047	-0.352983	-0.357107	-0.190191	-0.627501	-0.022957	-0.115083	-0.303012	-0.206891	-0.19593	-0.107414	-0.473675	0.130607	0.0192419	-0.0496301	0.109224	0.218965	-0.00499988	-0.0271698	-0.603425	-0.381405	0.0675307	-0.415345	-0.347418	0.114346	0.116615	-0.108878
YBR130C	SHE3	transport; intracellular mRNA localization; endoplasmic reticulum inheritance; mating type switching; mRNA transport	mRNA binding; RNA binding	membrane; endoplasmic reticulum; cellular bud tip; endoplasmic reticulum membrane; cytoplasm	0.00909435	0.147376	-0.286147	-0.617661	-0.267204	0.11769	0.25895	0.113196	0.149559	-0.0373702	0.195685	-0.20907	-0.0133946	-0.108405	-0.288132	0.155245	-0.348747	-0.0239456	-0.158818	0.0271297	0.430735	0.0109649	-0.0900216	0.0128524	0.241671	-0.951434	-0.0565181	0.269697
YBR131W	CCZ1	transport; protein targeting to vacuole; autophagic vacuole fusion; vesicle docking; autophagy; protein transport; vacuolar transport	guanyl-nucleotide exchange factor activity	membrane; vacuolar membrane; endosome; Mon1-Ccz1 complex; late endosome membrane; multivesicular body membrane; vacuole	-0.0563388	0.117538	-0.335354	-0.130057	0.388162	-0.238019	0.0165723	-0.105031	0.0241146	-0.0946017	-0.0687643	-0.151966	-0.0784619	-0.162596	-0.152048	-0.104528	0.00435515	-0.344306	-0.365339	-0.778104	-0.0571303	-0.129354	-0.271665	-0.37192	-0.43421	-0.548611	-0.466102	-0.558073
YBR132C	AGP2	positive regulation of polyamine transmembrane transport; transport; transmembrane transport; amino acid transport; amino acid transmembrane transport; positive regulation of (R)-carnitine transmembrane transport	molecular_function; polyamine transmembrane transporter activity; amino acid transmembrane transporter activity	membrane; fungal-type vacuole membrane; integral to plasma membrane; integral to membrane; endoplasmic reticulum membrane	-0.0254995	-1.40091	2.36445	2.88156	0.0109186	-0.134676	0.0416334	0.231869	0.302618	0.0902786	-0.0261683	0.68338	0.831909	0.352094	0.832226	0.511808	0.750152	0.53566	0.746988	2.03279	-0.0272739	-0.0352201	0.586346	0.185333	-0.0442969	0.289301	0.410413	0.609164
YBR133C	HSL7	protein methylation; mitosis; cell division; histone arginine methylation; regulation of cell cycle; G2/M transition of mitotic cell cycle; cell cycle; methylation	histone-arginine N-methyltransferase activity; methyltransferase activity; protein-arginine omega-N monomethyltransferase activity; transferase activity; protein-arginine omega-N symmetric methyltransferase activity	cytoplasm; cellular bud neck	-0.121748	0.878464	-1.31298	-1.32576	-0.344332	-0.0371929	-0.182137	-0.20016	0.0994168	-0.354739	-0.00713529	0.00548219	0.0279348	-0.0459808	-0.1863	-0.0843018	-0.166185	-0.0113918	-0.197488	0.629927	0.137961	0.0720327	-0.385535	-0.349876	0.0375986	-0.49042	-0.613281	-0.117592
YBR135W	CKS1	chromatin remodeling; regulation of mitotic cell cycle; cell division; transcription, DNA-dependent; cell cycle; positive regulation of transcription, DNA-dependent	histone binding; ubiquitin binding; protein kinase activator activity; cyclin-dependent protein serine/threonine kinase regulator activity	nucleus; cyclin-dependent protein kinase holoenzyme complex; cytoplasm	-0.235309	-0.2213	-0.742275	-0.708294	0.0509401	-0.00511921	-0.0730295	-0.140256	-0.126964	-0.118098	-0.233717	-0.273523	-0.227872	-0.310228	-0.231305	-0.276465	-0.315478	-0.326835	-0.345859	-0.0671097	-0.0205302	-0.183964	-0.477912	-0.0516645	-0.158223	-2.24472	-0.381669	-0.376519
YBR136W	MEC1	telomere maintenance via recombination; phosphorylation; DNA damage induced protein phosphorylation; DNA repair; DNA replication; DNA damage checkpoint; nucleobase-containing compound metabolic process; meiosis; reciprocal meiotic recombination; response to DNA damage stimulus; histone phosphorylation; DNA recombination; chromatin modification; telomere maintenance	ATP binding; kinase activity; phosphotransferase activity, alcohol group as acceptor; protein serine/threonine kinase activity; nucleotide binding; protein kinase activity; transferase activity; transferase activity, transferring phosphorus-containing groups	nucleus; mitochondrion	-0.0562582		-0.191205	0.553926	-0.373828	0.326036	0.00388459	-0.185805	0.116673	-0.318385	0.0290337	-0.353353	0.122917	-0.522675	-0.662021	0.0468023	-0.218492	-0.23051	-0.344347	0.271588	-0.0937597	-0.62025	-0.543929	-0.202813	0.0448438	0.00366923	-0.595946	0.0493024
YBR137W	YBR137W	biological_process	molecular_function	cytoplasm; TRC complex	-0.0556814	-0.544464	1.15812	1.6218	0.114177	-0.497832	-0.184081	-0.0276383	-0.25078	-0.0402211	-6.31888e-05	0.176536	0.00968343	0.00676447	0.0396324	0.187831	0.356672	0.124352	0.2902	0.344358	-0.0407027	0.147448	0.59311	0.453781	0.476676	0.693706	0.96358	0.889334
YBR138C	YBR138C	biological_process	molecular_function	cytoplasm	-0.290469	0.351065	-0.129142	0.0462125	-0.243901	-0.876074	0.177126	0.51941	-0.0191825	0.0435283	-0.0717581	-0.0621062	-0.139265	0.0857666	-0.108961	-0.152001	0.130828	-0.176097	0.524128	-0.00203065	-0.275183	-0.80744	0.464609	-0.288049	0.0692663	-0.0977074	0.314828	-0.891913
YBR139W	YBR139W	proteolysis; phytochelatin biosynthetic process	carboxypeptidase activity; peptidase activity; hydrolase activity; serine-type carboxypeptidase activity; serine hydrolase activity	fungal-type vacuole	-0.197595	-0.813942	0.862432	1.51513	-0.0921049	-0.318757	-0.289843	0.285726	0.537412	0.47717	0.235807	0.755895	-0.0662155	0.162295	0.407797	0.889013	1.18934	1.20395	1.40675	1.85737	0.0776541	0.216979	0.874476	0.957749	0.955457	2.01039	1.67992	1.86457
YBR140C	IRA1	negative regulation of Ras protein signal transduction; signal transduction; regulation of adenylate cyclase activity; positive regulation of Ras GTPase activity; negative regulation of cAMP biosynthetic process; regulation of small GTPase mediated signal transduction	Ras GTPase activator activity; GTPase activator activity	membrane; intracellular; integral to membrane; intrinsic to internal side of plasma membrane; mitochondrion; cytoplasm	-0.230981	-0.256489	-0.582504	0.321486	0.191321	0.180153	0.0411563	-0.0589142	0.318394	-0.000367549	0.214884	0.0530112	-0.0143356	-0.119514	0.0447412	-0.0462736	-0.369219	0.0336464	0.0492566	0.371466	0.162151	-0.0830157	0.00934241	-0.0245139	0.366457	0.027917	-0.260745	0.292478
YBR141C	BMT2	methylation; biological_process	S-adenosylmethionine-dependent methyltransferase activity; methyltransferase activity; rRNA (adenine) methyltransferase activity; transferase activity	nucleus; nucleolus	0.0426068	0.419234	-0.812931	-1.72017	-0.215264	0.824374	-0.131483	-0.36724	-0.344461	-0.276227	-0.116396	-1.09029	0.00953111	-0.64096	-0.629587	-0.619074	-0.614704	-1.05303	-1.52281	-1.81564	-0.0618143	0.0247445	-0.846878	-0.895856	-0.603068	-1.19531	-1.42958	-1.58822
YBR142W	MAK5	ribosome biogenesis; maturation of 5.8S rRNA from tricistronic rRNA transcript (SSU-rRNA, 5.8S rRNA, LSU-rRNA); maturation of LSU-rRNA from tricistronic rRNA transcript (SSU-rRNA, 5.8S rRNA, LSU-rRNA); ribosomal large subunit biogenesis; rRNA processing	RNA binding; ATP binding; helicase activity; ATP-dependent helicase activity; nucleic acid binding; hydrolase activity; ATP-dependent RNA helicase activity; nucleotide binding	nucleus; nucleolus	0.106565	1.22761	-1.91113	-2.22795	0.228538	0.866137	0.437319	-0.198708	0.0447479	-0.326337	-0.184637	-0.872414	0.315127	0.314523	-0.0716895	-0.222082	-0.605498	-0.685924	-1.17168	-1.06824	0.381955	0.203108	-0.352921	-0.864525	-0.384447	-1.17464	-1.69634	-1.44087
YBR143C	SUP45	translational termination; translation; cytokinesis	translation release factor activity, codon specific; translation release factor activity	translation release factor complex; cytosol; cytoplasm	-0.0736808	0.571171	-1.44699	-1.88459	0.0601633	0.195832	0.233033	0.132082	-0.0213598	-0.139753	-0.215861	-0.405033	-0.00676418	-0.0169645	-0.139839	-0.242652	-0.417304	-0.383648	-0.42248	-0.680849	0.0295172	-0.202897	-0.311342	-0.132279	-0.164238	-0.469223	-0.461644	-0.393789
YBR145W	ADH5	amino acid catabolic process to alcohol via Ehrlich pathway; ethanol biosynthetic process involved in glucose fermentation to ethanol; NADH oxidation; oxidation-reduction process	alcohol dehydrogenase (NAD) activity; metal ion binding; zinc ion binding; oxidoreductase activity	nucleus; cytoplasm	-0.257926	-1.24423	1.47837	1.2429	-0.157603	0.153891	1.22971	0.980314	0.602622	0.856101	0.813546	0.370664	-0.291446	0.366094	0.501886	0.490843	0.865007	0.642256	0.512169	-0.205293	0.371599	0.34794	0.31505	0.489232	-0.125887	0.416509	0.355744	0.198227
YBR146W	MRPS9	mitochondrial translation; translation	structural constituent of ribosome	ribosome; ribonucleoprotein complex; mitochondrial small ribosomal subunit; mitochondrion	-0.17048	-0.155133	-0.228831	0.0934745	0.217205	0.389227	0.113541	0.442142	0.0297923	0.0928495	0.049412	0.160097	0.247791	0.297787	-0.0124014	0.0461077	0.0710561	-0.179043	-0.0525822	1.87431e-05	0.204912	0.295814	0.321142	0.181087	0.182081	0.0842009	0.339094	0.51196
YBR147W	RTC2	basic amino acid transmembrane export from vacuole	cationic amino acid transmembrane transporter activity	membrane; integral to fungal-type vacuolar membrane; integral to membrane; mitochondrion; mitochondrial membrane	-0.247446	-1.12085	1.18648	0.903295	-0.56607	-0.791279	1.15104	0.918729	0.49506	0.495099	0.34255	1.22182	0.129369	-0.0410137	0.866502	0.959694	1.75851	1.60616	1.72473	1.47248	-0.10857	-0.770177	1.36219	1.11901	1.11797	2.81328	2.61876	2.33336
YBR148W	YSW1	ascospore-type prospore membrane assembly	molecular_function	prospore membrane	-0.319928	0.651002	-0.714367	-0.188178	0.0365549	-0.560642	-0.332684	-0.68817	-0.339658	-0.644145	-0.263065	0.270883	-0.19658	-0.0221956	0.125506	-0.0421216	0.359939	-0.094225	-0.216273	-0.327808	-0.380551	-0.541875	0.0631175	-0.190922	0.112127	0.0390039	0.0455591	-0.195161
YBR149W	ARA1	cellular carbohydrate metabolic process; oxidation-reduction process	alditol:NADP+ 1-oxidoreductase activity; D-arabinose 1-dehydrogenase [NAD(P)+] activity; oxidoreductase activity	cytosol; cytoplasm	0.140667	-0.737764	1.27092	1.27184	0.113502	-0.218613	-0.0942354	0.114817	0.636832	0.569611	0.680738	0.964514	0.06481	0.0458725	0.258345	0.576091	0.625599	1.19512	1.42416	2.03813	0.279133	0.011487	0.315322	1.09585	2.11301	2.46057	2.2337	2.84607
YBR150C	TBS1	regulation of transcription from RNA polymerase II promoter; regulation of transcription, DNA-dependent; transcription, DNA-dependent; biological_process; transcription from RNA polymerase II promoter	sequence-specific DNA binding RNA polymerase II transcription factor activity; DNA binding; metal ion binding; zinc ion binding; sequence-specific DNA binding	membrane; nuclear membrane; nucleus; integral to membrane; mitochondrial membrane; mitochondrion; cytoplasm	-0.398876	-0.234594	-0.402529	-0.119141	-0.651918	-0.550939	-0.0275092	0.00785001	-0.441565	-0.376059	-0.133481	0.122305	-0.368334	-0.235296	-0.404419	-0.159269	-0.398248	-0.318562	0.146223	-0.000133242	-0.505332	-0.531625	-0.0944929	-0.351374	-0.29052	-0.378861	-0.242465	0.114379
YBR151W	APD1	biological_process	molecular_function	nucleus; cytoplasm	0.0993946	-0.563242	0.954575	0.873328	0.220459	-0.232269	0.223142	0.150399	0.0160512	0.198404	0.083733	0.301416	-0.0367831	-0.00631597	0.285777	0.460059	0.250833	0.350341	0.510496	0.421285	-0.258992	-0.0246972	0.406219	0.759468	0.83569	1.13018	1.49439	1.1947
YBR152W	SPP381	mRNA processing; generation of catalytic spliceosome for first transesterification step; mRNA splicing, via spliceosome; RNA splicing	molecular_function; RNA binding	nucleus; spliceosomal complex; ribonucleoprotein complex; cytosol; U4/U6 x U5 tri-snRNP complex	-0.809538	-0.213887	-0.0891904	-0.408182	-0.661332	0.405365	-0.548227	-0.22977	0.243007	0.0667695	-0.0101569	-0.184103	0.643374	0.283916	-0.172617	-0.570948	-0.61852	0.545444	0.445283	0.18555	-0.22798	-0.177336	-0.496459	-0.265551	0.100614		-1.07361	0.330042
YBR153W	RIB7	riboflavin biosynthetic process; oxidation-reduction process	NADP binding; 5-amino-6-(5-phosphoribosylamino)uracil reductase activity; oxidoreductase activity	cellular_component	-0.0384357	0.0877693	-0.562958	-0.653527	-0.524651	-0.176892	-0.327001	-0.177611	0.0189849	-0.42046	-0.224957	-0.260675	-0.202775	-0.166415	-0.0991063	-0.293443	-0.306795	-0.336576	-0.216404	-0.39443	-0.1648	-0.185623	-0.289032	0.0183918	-0.299321	-0.289718	-0.387361	-0.162364
YBR154C	RPB5	transcription from RNA polymerase I promoter; tRNA transcription from RNA polymerase III promoter; transcription, DNA-dependent; transcription from RNA polymerase III promoter; transcription from RNA polymerase II promoter	DNA-directed RNA polymerase activity; DNA binding; RNA polymerase II activity; RNA polymerase III activity; RNA polymerase I activity; RNA-directed RNA polymerase activity	DNA-directed RNA polymerase II, core complex; nucleus; DNA-directed RNA polymerase I complex; DNA-directed RNA polymerase III complex	0.00248615	0.581191	-1.22964	-2.0481	0.164665	0.173538	0.103141	-0.194799	-0.588066	-0.300635	-0.427833	-0.54841	-0.291967	0.052105	0.0804624	-0.343623	-0.167689	-0.622062	-0.637083	-1.02716	-0.131285	-0.0132322	0.135754	-0.476107	-0.480164	-0.663017	-0.766164	-0.79183
YBR155W	CNS1	protein folding	Hsp90 protein binding; Hsp70 protein binding	cytoplasm	-0.101241	1.37928	-2.54608	-2.81474	0.283239	0.246333	0.175083	-0.0727852	-0.340958	-0.0764989	-0.159191	-0.824418	-0.0365094	-0.0283652	-0.499629	-0.638092	-0.654602	-0.835552	-1.00771	-1.63584	0.0237681	-0.0522935	-0.448006	-0.454177	-0.535995	-1.04095	-1.2328	-1.12468
YBR156C	SLI15	chromosome segregation; protein phosphorylation; regulation of cytokinesis	protein kinase activator activity	cytoskeleton; nucleus; spindle midzone; chromosome; chromosome passenger complex; chromosome, centromeric region; cytoplasm; kinetochore microtubule; spindle; kinetochore; condensed chromosome kinetochore; spindle microtubule	-0.182157	0.44519	-1.95694	-1.06283	-0.197586	-0.1075	0.155104	-0.39502	-0.78721	-0.391243	-0.312707	-0.242075	-0.282427	-0.264078	-0.405391	-0.365783	-0.397062	-0.346271	-0.49854	-0.168169	-0.383437	-0.538068	-0.113899	-0.242927	-1.01761	-1.05328	-0.8177	-0.419205
YBR157C	ICS2	biological_process	molecular_function	cellular_component	-0.243552	0.4207	-0.229381	0.768816	0.28806	0.356653	0.319687	0.0158364	-0.206393	0.144078	0.0832371	-0.0190005	-0.132774	-0.750893	-0.278167	-0.412906	0.0419399	-1.03697	-0.241883	-0.80538	-0.255274	-0.530048	0.16103	-1.02967	-0.388598	-0.800272	-0.376293	-0.0597659
YBR158W	AMN1	mitotic cell cycle checkpoint; cell division; negative regulation of exit from mitosis; cell cycle; mitosis	protein binding	nucleus; cytoplasm; cellular bud	0.033184	0.36031	-0.764319	-0.760508	0.127392	0.246755	-0.0746548	-0.146922	-0.044366	-0.257185	-0.204156	-0.0592947	0.150877	-0.306277	-0.37725	-0.366354	-0.809926	-0.531742	-0.587548	-0.111248	0.405385	0.185495	-0.11455	-0.893757	-0.606346	-0.297278	-0.523771	-0.387277
YBR159W	IFA38	fatty acid elongation; metabolic process; fatty acid metabolic process; fatty acid biosynthetic process; oxidation-reduction process; lipid metabolic process	ketoreductase activity; oxidoreductase activity	membrane; endoplasmic reticulum; integral to membrane; endoplasmic reticulum membrane	-0.0784325	0.381109	-0.53373	-0.768283	0.141528	-0.0953913	-0.089253	0.0592789	0.221169	0.126452	-0.0564853	0.292343	-0.210571	0.255532	0.109898	0.32663	0.735228	0.13577	0.205673	-0.0748811	-0.443185	0.0993024	0.217488	-0.153301	-0.392278	0.2881	0.301742	-0.0557293
YBR160W	CDC28	phosphorylation; positive regulation of triglyceride catabolic process; negative regulation of sister chromatid cohesion; chromatin remodeling; 7-methylguanosine mRNA capping; phosphorylation of RNA polymerase II C-terminal domain; meiotic DNA double-strand break processing; regulation of double-strand break repair via homologous recombination; mitosis; positive regulation of transcription, DNA-d…	histone binding; ATP binding; kinase activity; RNA polymerase II core binding; cyclin-dependent protein serine/threonine kinase activity; protein serine/threonine kinase activity; protein kinase activity; nucleotide binding; transferase activity; transferase activity, transferring phosphorus-containing groups	ribosome; endoplasmic reticulum; nucleus; spindle pole body; cytoplasm; cellular bud neck; cyclin-dependent protein kinase holoenzyme complex; astral microtubule	-0.430159	-0.14466	-0.664496	-1.03502	-0.156439	-0.488981	-0.279696	-0.20782	-0.177898	-0.209096	-0.156537	-0.0923855	-0.313436	-0.477922	-0.516101	-0.293369	-0.729113	-0.366552	-0.187896	-0.508842	-0.176237	-0.397101	-0.29985	-0.110899	-0.224732	-0.652715	-0.44084	-0.463496
YBR161W	CSH1	glycosphingolipid biosynthetic process; sphingolipid biosynthetic process	transferase activity, transferring glycosyl groups; mannosyltransferase activity; transferase activity	membrane; vacuolar membrane; fungal-type vacuole; integral to membrane; vacuole	-0.0297677	-0.471787	0.119708	0.435399	0.248491	-0.0951684	-0.246495	-0.249122	-0.414801	-0.0639073	-0.343009	0.310361	-0.0583992	-0.468504	-0.563365	0.0849902	0.252191	0.407276	0.511421	0.445992	-0.465621	0.209902	0.377618	0.368648	-0.200796	0.191951	0.387328	0.506157
YBR162C	TOS1	biological_process	molecular_function	fungal-type cell wall; fungal-type vacuole; extracellular region	0.146668	0.940549	-1.89504	-2.32631	0.236629	0.417935	0.057088	0.0162368	0.388009	0.139497	-0.0318808	0.158091	0.175525	0.406617	0.316824	0.468696	0.620303	0.138896	-0.000786822	0.194305	0.0165764	0.204725	-0.150035	-0.253723	-0.350027	-0.274823	-0.590184	-1.0468
YBR162W-A	YSY6	transport; protein secretion; protein transport	molecular_function	membrane; endoplasmic reticulum; integral to membrane; endoplasmic reticulum membrane	0.475583	0.435924	-0.556284	-1.08436	0.690228	0.00930161	0.181433	0.301472	-0.365826	0.171118	-0.137958	-0.024464	0.204566	0.591924	0.581409	0.0710001	0.799372	0.290367	0.339972	-0.477442	0.00407625	0.657509	1.17171	0.453019	-0.0442904	0.248184	0.917609	-0.43009
YBR163W	EXO5	nucleic acid phosphodiester bond hydrolysis; mitochondrial genome maintenance	DNA binding; single-stranded DNA 5'-3' exodeoxyribonuclease activity; iron-sulfur cluster binding; nuclease activity; metal ion binding; exonuclease activity; hydrolase activity; 4 iron, 4 sulfur cluster binding	mitochondrion	0.0195671	0.26792	-0.408948	-0.470865	-0.386654	-0.0138133	-0.335994	-0.261473	0.0308358	-0.276952	-0.254629	-0.296952	0.0128726	-0.0138336	-0.207522	-0.0615225	-0.206612	-0.195696	-0.45365	-0.244965	-0.207208	0.0620109	-0.27863	-0.351372	-0.309051	-0.506981	-0.502002	-0.614857
YBR164C	ARL1	transport; protein targeting to vacuole; Golgi to plasma membrane protein transport; small GTPase mediated signal transduction; protein transport; vesicle-mediated transport	nucleotide binding; GTP binding; GTPase activity	cytosol; Golgi apparatus; intracellular; trans-Golgi network	-0.0903609	0.147312	-0.370636	-0.574716	0.285267	-0.410164	0.0834548	0.253698	-0.177466	0.0576602	-0.115758	-0.0588891	-0.100209	0.190135	0.194095	0.0845648	0.175374	-0.088692	-0.0525729	-0.865112	0.401444	0.514707	0.857449	0.44444	0.164641	1.02043	0.799621	0.166572
YBR165W	UBS1	protein ubiquitination; protein export from nucleus	molecular_function	nucleus	-0.00328781	-0.523394	0.562992	0.501841	0.2769	0.112425	0.203289	0.0119572	0.0554034	0.102118	0.0117165	0.0700442	0.324052	0.208469	0.285548	0.489183	0.258176	0.124282	0.13865	-0.32608	0.0781891	0.23792	0.03918	0.169096	-0.05382	0.314305	0.0568013	-0.0447247
YBR166C	TYR1	cellular amino acid biosynthetic process; tyrosine biosynthetic process; aromatic amino acid family biosynthetic process; tyrosine metabolic process; oxidation-reduction process	prephenate dehydrogenase activity; prephenate dehydrogenase (NADP+) activity; oxidoreductase activity	cytoplasm	-0.388324	-0.0877741	-0.336652	-0.474188	-0.221157	-0.284456	-0.0412324	0.0458414	-0.167392	0.0481918	-0.0260798	-0.0346187	-0.219107	-0.158537	-0.317334	-0.411961	-0.263778	-0.161141	-0.243017	-0.696389	-0.279885	-0.424369	-0.579618	-0.420393	-0.376866	-0.467584	-0.592481	-0.587366
YBR167C	POP7	intronic box C/D snoRNA processing; mRNA cleavage; rRNA processing; tRNA processing	hydrolase activity; ribonuclease MRP activity; ribonuclease P activity	ribonuclease MRP complex; nucleus; nucleolar ribonuclease P complex	0.364342	0.661596	0.317334	0.316028	-0.00259647	-0.0644417	0.225185	-0.0515469	-0.125674	0.201509	-0.0952714	-0.175896	0.0441282	0.26156	0.141042	-0.185902	0.160389	-0.0376332	0.0630414	-0.0198654	0.390413	0.307682	-0.292365	0.749943	0.283208	-0.0608523	0.416598	0.114063
YBR168W	PEX32	peroxisome organization	molecular_function	integral to peroxisomal membrane; membrane; integral to membrane; peroxisome; peroxisomal membrane	-0.319438	-0.670442	0.959899	1.34884	0.0407533	-0.36801	-0.0315539	0.287338	0.076825	0.0555899	0.0483748	0.350037	-0.139259	0.00822682	-0.00111115	0.272474	0.200007	0.220586	0.350902	0.252692	-0.452969	-0.195374	0.302087	0.053407	-0.140759	0.529395	0.44598	0.376623
YBR169C	SSE2	protein folding; response to stress; protein refolding	ATP binding; nucleotide binding; calmodulin binding; adenyl-nucleotide exchange factor activity	cytoplasm	0.142188	-0.238767	1.03167	1.16889	-0.250011	-0.433994	-0.301292	-0.242649	0.231436	0.362443	0.355998	1.12596	0.0800725	0.167328	-0.0716083	0.416179	-0.0876591	0.235725	0.724025	2.13951	0.169288	0.0217406	-0.326305	0.348661	1.32913	1.26658	1.83713	2.47143
YBR170C	NPL4	transport; positive regulation of protein localization to nucleus; retrograde protein transport, ER to cytosol; ribosome-associated ubiquitin-dependent protein catabolic process; ER-associated misfolded protein catabolic process; mitotic spindle disassembly; ER-associated protein catabolic process; mRNA transport; cytoplasm-associated proteasomal ubiquitin-dependent protein catabolic process; mit…	molecular_function	membrane; RQC complex; nuclear membrane; endoplasmic reticulum; nucleus; nuclear outer membrane-endoplasmic reticulum membrane network; cytoplasm; perinuclear region of cytoplasm; Cdc48p-Npl4p-Ufd1p AAA ATPase complex; Cdc48p-Npl4p-Vms1p AAA ATPase complex; integral to membrane; Doa10p ubiquitin ligase complex; endoplasmic reticulum membrane	-0.508742	-0.323853	0.220928	0.153377	-0.192958	-0.0560121	0.281489	0.327673	0.709552	0.338627	0.0537757	0.0843836	0.163587	0.253379	0.303986	0.244149	-0.0622402	0.319309	-0.123172	0.36061	-0.315993	-0.433179	-0.289707	0.0713607	-0.0525404	1.14478	-0.147263	0.0693581
YBR171W	SEC66	transport; filamentous growth; protein transport; posttranslational protein targeting to membrane, translocation	protein transporter activity	membrane; endoplasmic reticulum; Sec62/Sec63 complex; integral to membrane; endoplasmic reticulum membrane	-0.422027	0.293969	-1.13374	-0.655568	-0.0930928	-0.199831	-0.144543	-0.0120331	-0.189866	-0.106412	-0.244846	-0.219224	-0.518705	-0.117243	-0.233163	-0.18069	0.251197	-0.323472	-0.163752	-0.657531	-0.378974	-0.183007	-0.085373	-0.344124	-0.698388	-0.214774	-0.279809	-0.580917
YBR172C	SMY2	ER to Golgi vesicle-mediated transport	molecular_function	extrinsic to membrane; endoplasmic reticulum membrane; cytoplasm; cytoplasmic mRNA processing body	-0.178694	0.0741784	-0.850513	-0.893253	0.00473345	0.378758	-0.113568	-0.137771	-0.00955632	-0.110175	0.0962039	-0.398317	0.197333	-0.203417	-0.483777	-0.312877	-0.291447	-0.329367	-0.739311	-0.467768	0.10344	0.102569	-0.387418	-0.158135	-0.142823	-0.686183	-0.623527	-0.326719
YBR173C	UMP1	proteasome assembly; ubiquitin-dependent protein catabolic process; response to DNA damage stimulus	molecular_function	nucleus; proteasome complex; cytoplasm	0.0456685	-0.106599	0.209728	0.0871851	0.248577	-0.145063	0.284109	0.347454	0.687797	0.531064	0.50328	0.310178	-0.0215751	0.197488	0.316225	0.284025	0.265869	0.325635	0.312881	-0.0749199	-0.155607	-0.300157	-0.0245632	0.080225	0.258132	0.103431	-0.0330408	-0.212166
YBR174C	YBR174C				1.53758	0.627672	1.05077	0.484593	0.580827	1.98926	0.162199	0.0432299	1.26			-0.56819	0.18134	0.112016	1.76451	0.494541	1.01734	-0.409901	1.14941	1.6829	1.02339			1.15211	1.80802	-0.426376	1.07121	-0.891642
YBR175W	SWD3	histone H3-K4 methylation; chromatin silencing at telomere; telomere maintenance	histone methyltransferase activity (H3-K4 specific)	chromosome, telomeric region; nucleus; Set1C/COMPASS complex; chromosome	0.0152066	0.425235	-0.605956	-0.9452	0.120699	0.134867	0.289598	0.348277	-0.00924518	0.281642	0.152852	0.0377554	0.168617	0.413237	0.489276	0.739744	0.715644	0.342138	0.019442	-0.0590235	0.382748	0.583933	0.870313	0.385153	-0.209814	0.484202	0.702973	0.180235
YBR176W	ECM31	pantothenate biosynthetic process	3-methyl-2-oxobutanoate hydroxymethyltransferase activity; catalytic activity; transferase activity	mitochondrion	-0.0438746	0.326575	-0.173111	-0.218275	0.0517984	-0.0319958	-0.0121728	0.14728	-0.145495	-0.168801	-0.126477	-0.100959	0.109712	0.31069	0.177357	0.119293	-0.0350679	0.0290537	-0.104336	-0.655256	-0.430597	0.194612	-0.062589	-0.436002	-0.376528	-0.268794	-0.307968	-0.592753
YBR177C	EHT1	medium-chain fatty acid biosynthetic process; cellular lipid metabolic process; medium-chain fatty acid catabolic process	transferase activity, transferring acyl groups; alcohol O-acetyltransferase activity; serine hydrolase activity; short-chain carboxylesterase activity; carboxylesterase activity; hydrolase activity; transferase activity; alcohol O-butanoyltransferase activity	lipid particle; mitochondrial outer membrane; mitochondrion	0.0593047	0.264167	-0.588731	-1.14922	-0.101155	-0.279011	-0.0700335	-0.0296347	0.369748	0.042181	0.128886	0.0468957	0.0427793	0.18969	0.36863	0.32942	0.254829	0.771684	0.34054	0.487715	0.0879231	-0.129656	-0.544337	-0.104362	0.0841319	-0.523615	-0.496411	-0.322058
YBR179C	FZO1	mitochondrial fusion; mitochondrion localization; GTP catabolic process	hydrolase activity; nucleotide binding; GTP binding; protein homodimerization activity; GTPase activity	membrane; integral to mitochondrial outer membrane; integral to membrane; mitochondrial inner membrane; mitochondrial membrane; mitochondrial outer membrane; mitochondrion	0.0178402	0.0853828	-0.275421	0.0228989	-0.0180268	-0.364047	0.00922645	-0.0574103	0.124347	0.0214943	0.183635	-0.0831874	-0.171866	-0.190711	0.151451	-0.155607	-0.166892	0.0769858	0.10553	-0.0963586	-0.0725257	-0.054146	-0.067469	-0.651334	-0.0672208	-0.0204959	-0.406094	-0.0666172
YBR180W	DTR1	transport; ascospore wall assembly; sporulation resulting in formation of a cellular spore; transmembrane transport; amine transport	amine transmembrane transporter activity	membrane; integral to membrane; prospore membrane	-0.327919		0.650937	1.56854	0.827188	-0.051691	0.385788	-0.747807	0.295876	0.205565	0.0658294	-0.832529	-0.32203	-0.330637	-0.449067	0.198435	0.577569	-0.284437	0.18345	-0.593794	-0.223865	-0.838021	-0.64743	-0.711186	-0.103969	-0.129047	0.0462979	-0.482523
YBR181C	RPS6B	maturation of SSU-rRNA from tricistronic rRNA transcript (SSU-rRNA, 5.8S rRNA, LSU-rRNA); ribosome biogenesis; translation; cytoplasmic translation; ribosomal small subunit biogenesis; rRNA processing	structural constituent of ribosome	ribosome; nucleus; intracellular; cytoplasm; small-subunit processome; nucleolus; ribonucleoprotein complex; cytosolic small ribosomal subunit	0.195789	-0.157263	-0.744763	-1.7005	0.404454	0.142087	0.199467	0.276991	0.255205	0.18552	0.186506	0.219618	0.273156	0.353057	0.0466543	0.232379	0.522642	0.0991617	0.117669	-0.352064	0.15134	0.2588	0.246327	0.213708	-0.0199416	0.155379	-0.0727458	-0.122332
YBR182C	SMP1	regulation of transcription, DNA-dependent; transcription, DNA-dependent; positive regulation of transcription from RNA polymerase II promoter in response to osmotic stress	DNA binding; sequence-specific DNA binding; DNA binding, bending; sequence-specific DNA binding transcription factor activity; protein dimerization activity	nucleus; cytoplasm	-0.155898	-0.190648	-0.537957	0.225433	-0.464589	-0.136135	0.0623531	-0.366185	0.128178	-0.0341983	-0.0216526	-0.0228497	-0.208817	-0.452942	-0.470696	-0.169243	-0.375939	-0.21761	-0.124659	0.182563	0.0968858	-0.623697	-1.00147	-0.268743	-0.492685	-1.33119	-0.482329	0.21694
YBR183W	YPC1	ceramide catabolic process; ceramide biosynthetic process; ceramide metabolic process	hydrolase activity; hydrolase activity, acting on carbon-nitrogen (but not peptide) bonds, in linear amides; sphingosine N-acyltransferase activity; phytoceramidase activity	membrane; endoplasmic reticulum; Golgi apparatus; integral to membrane; endoplasmic reticulum membrane; Golgi membrane	-0.0990121	-1.14636	1.5836	1.8746	-0.588728	-0.31175	-0.645498	-0.184741	-0.469238	0.529135	0.0117489	1.22697	-0.0743199	0.218162	0.716184	1.75485	2.58898	2.82817	3.39897	2.89954	-0.209748	0.0586664	0.860163	1.33187	1.39213	2.44136	2.40975	2.34646
YBR184W	YBR184W	biological_process	molecular_function	cellular_component	-0.655357	0.820589	0.241065	-0.324518	-0.152141	-0.161267	-0.428364	-0.427337	-0.33789	-1.11964	-0.182834	1.11167	-0.304054	-0.182829	-0.622347	0.402266	-0.123443	0.599325	-0.162609	0.228686	-0.50297	-0.888589	0.327268	-0.206676	-0.51216	-0.244304	0.0848542	0.378812
YBR185C	MBA1	inner mitochondrial membrane organization; protein insertion into mitochondrial membrane from inner side; positive regulation of mitochondrial translation; mitochondrial respiratory chain complex IV biogenesis; mitochondrial respiratory chain complex III biogenesis	ribosome binding	membrane; mitochondrial inner membrane; mitochondrion	-0.191405	-0.263136	0.386769	0.31267	-0.293615	-0.0791016	0.0640939	-0.169009	0.036027	-0.10491	0.0324526	0.257276	-0.0954385	-0.194679	0.171228	0.0744532	-0.111457	0.166318	-0.0788739	0.441477	0.00997425	-0.0783088	-0.0795738	0.135683	-0.148108	0.1329	0.123217	0.845398
YBR187W	GDT1	cellular calcium ion homeostasis	molecular_function	membrane; fungal-type vacuole membrane; fungal-type vacuole; cis-Golgi network; Golgi medial cisterna; vacuole; Golgi membrane; vacuolar membrane; Golgi apparatus; integral to membrane	-0.00117382	-0.166161	-0.259679	-1.01412	0.36409	0.258889	0.259465	0.0743213	0.351333	0.341679	0.0833438	0.269167	-0.018617	0.150653	0.0932054	0.308455	0.654187	0.208634	0.293778	-0.246931	-0.111511	0.183601	-0.0334858	-0.324318	-0.270083	0.266295	-0.0631527	-0.693421
YBR188C	NTC20	mRNA processing; mRNA splicing, via spliceosome; RNA splicing	first spliceosomal transesterification activity	nucleus; U2-type catalytic step 1 spliceosome; spliceosomal complex; Prp19 complex	-0.28911	-0.356164	0.816614	0.877951	-0.442198	0.557069	0.330188	0.0684529	-0.657653	-0.022052	0.160223	-0.270148	-0.151334	-0.845051	0.0573212	-0.0485033	-1.0052	-0.662777	-0.981041	-0.0645159	-1.00764	-0.931754	-0.241522	-0.339486	-1.54462	0.129961	0.252464	-0.101755
YBR189W	RPS9B	ribosome biogenesis; maturation of SSU-rRNA from tricistronic rRNA transcript (SSU-rRNA, 5.8S rRNA, LSU-rRNA); translation; rRNA processing; positive regulation of translational fidelity	RNA binding; structural constituent of ribosome; rRNA binding	ribosome; 90S preribosome; nucleus; intracellular; small ribosomal subunit; cytoplasm; small-subunit processome; nucleolus; ribonucleoprotein complex; cytosolic small ribosomal subunit	0.620459	0.184406	-0.454233	-1.26931	0.704119	0.367494	0.489924	0.680335	0.346468	0.516853	0.484556	0.402597	0.457655	0.514002	0.279904	0.136952	0.457441	0.147309		-0.350569	0.760585	0.757228	0.616614	0.939863	0.66251	0.545682	0.327451	0.472534
YBR190W	YBR190W				-0.0706829	0.148891	0.0343109	-1.3446	0.239991	-0.011642	-0.289298	-0.617005	-0.52612	0.458625	-0.175402	-0.0127385	-0.0601865	0.0146043	0.394991	-1.00452	0.23347	0.225368	-0.339072	0.21698	1.94968	1.76257	2.17198	2.54132	1.51256	1.78769	2.02318	1.61144
YBR191W	RPL21A	translation; cytoplasmic translation	structural constituent of ribosome	ribosome; ribonucleoprotein complex; cytosolic large ribosomal subunit; intracellular; cytoplasm	0.291036	-0.182745	-0.165029	-0.934824	0.318065	0.272292	0.150434	0.390019	0.163552	0.145032	0.111527	0.160853	0.339296	0.308081	0.0890515	0.180631	0.765093	0.216155	0.114268	-0.0462426	0.541513	0.290595	0.212858	0.356761	0.181692	0.380166	0.251066	0.129045
YBR192W	RIM2	transport; transmembrane transport; mitochondrial genome maintenance; pyrimidine nucleotide transport	pyrimidine nucleotide transmembrane transporter activity; transporter activity	membrane; integral to membrane; mitochondrial inner membrane; mitochondrion	-0.00806087	0.199063	-0.461268	-0.810213	-0.0724012	-0.0710312	-0.0355598	0.00727424	0.0128851	-0.0176272	-0.260763	0.12207	-0.129511	0.0401047	0.0111363	-0.0365936	-0.145115	-0.147898	-0.338543	-0.392252	0.196379	0.289905	-0.150026	0.233085	-0.0702579	0.107639	-0.444882	0.0505903
YBR193C	MED8	negative regulation of transcription from RNA polymerase II promoter; regulation of transcription from RNA polymerase II promoter; positive regulation of transcription from RNA polymerase II promoter; regulation of transcription, DNA-dependent; transcription, DNA-dependent	RNA polymerase II transcription corepressor activity; DNA binding; RNA polymerase II core promoter proximal region sequence-specific DNA binding; RNA polymerase II transcription cofactor activity; TBP-class protein binding; structural molecule activity	core mediator complex; nucleus; mediator complex	0.00333901	-0.325046	1.1299	1.07737	-0.103822	0.353786	0.112127	0.36721	-0.0776063	0.122685	-0.0919548	0.0609219	0.346528	0.0282013	0.193588	0.0567277	0.00931273	0.250338	-0.113262	-0.04648	0.013192	-0.0528426	0.342225	-0.00163833	-0.0197219	0.000610783	0.0347272	0.20947
YBR194W	AIM4	biological_process	molecular_function	cytoplasm	0.150114	-0.513876	0.563886	0.869039	0.12652	-0.134945	0.0389932	-0.000254949	0.0666702	0.051959	-0.00565067	-0.0698662	-0.24073	0.0706254	-0.0631029	0.225015	0.0729437	0.297113	0.33105	-0.0999865	0.491081	0.103119	0.342626	0.471429	0.398275	0.49361	0.573444	0.710298
YBR195C	MSI1	DNA replication-dependent nucleosome assembly	histone binding	nucleus; cytoplasm; CAF-1 complex	-0.198203	0.231595	-0.231444	-0.488681	0.025411	0.594899	-0.101992	-0.0708691	-0.25167	0.0399844	-0.0658333	-0.215717	-0.0677853	-0.30959	-0.0856791	0.0906583	-0.405038	-0.348537	-0.686392	-0.15448	-0.0325643	-0.0105533	-0.16647	-0.368994	-0.30256	-0.670162	-0.5173	-0.523905
YBR196C	PGI1	pentose-phosphate shunt; gluconeogenesis; glycolysis	glucose-6-phosphate isomerase activity; isomerase activity	mitochondrion; plasma membrane; cytoplasm	0.147703	-0.0757283	-0.0290652	-0.321397	0.0834684	-0.0828281	0.0303935	0.00580673	0.387366	0.30329	0.373774	0.288565	0.156152	0.0952472	-0.0286761	-0.126872	-0.0898237	0.0571561	-0.123183	-0.0184034	0.155252	-0.144893	-0.356485	-0.00331994	0.131965	-0.19634	-0.504102	-0.197179
YBR197C	YBR197C	biological_process	molecular_function	nucleus; cytoplasm	-0.289162	-0.00945464	0.042785	-0.357193	0.119236	0.458276	-0.0943706	-0.217081	0.0603747	0.242405	0.0202416	0.0127778	0.108699	0.112075	0.0767221	0.329417	-0.0714151	0.110574	-0.0829808	0.267431	0.356376	0.254226	-0.142797	0.152289	0.271475	-0.349189	-0.259694	0.0555423
YBR198C	TAF5	regulation of transcription, DNA-dependent; transcription, DNA-dependent; histone acetylation; chromatin modification; RNA polymerase II transcriptional preinitiation complex assembly; transcription from RNA polymerase II promoter	protein complex scaffold; ubiquitin binding; chromatin binding; RNA polymerase II core promoter sequence-specific DNA binding transcription factor activity involved in preinitiation complex assembly	SAGA complex; nucleus; SLIK (SAGA-like) complex; transcription factor TFIID complex	0.242424	0.376188	-0.00652735	-0.266942	0.0595675	0.585759	0.387363	0.0870161	0.0333407	-0.00475455	0.212927	0.16874	0.0274647	0.144398	-0.318294	0.0240978	-0.40976	-0.175898	-0.235054	-0.114651	0.00695847	0.152459	-0.299327	-0.291531	0.0705027	-0.229036	-0.763552	-0.326232
YBR199W	KTR4	protein glycosylation; protein N-linked glycosylation	transferase activity, transferring glycosyl groups; mannosyltransferase activity; transferase activity	membrane; Golgi apparatus; integral to membrane	0.0487464	-0.433641	0.489509	0.696933	0.268632	-0.368237	0.165627	0.224563	0.266043	0.320769	0.0966776	0.573764	0.00773686	0.307965	0.380286	0.658575	0.638882	0.40779	0.530009	0.46292	0.342875	0.467434	0.482117	0.491758	0.400289	0.943848	0.847682	0.853313
YBR200W	BEM1	cell morphogenesis involved in conjugation with cellular fusion; cell communication	protein complex scaffold; phosphatidylinositol-3-phosphate binding; phosphatidylinositol binding	cytoskeleton; site of polarized growth; mating projection tip; incipient cellular bud site; cellular bud tip; cellular bud neck; cytoplasm	0.081514	-0.122118	-0.376535	0.0826912	0.0700954	0.116358	0.116302	0.237275	0.409227	0.0250848	0.172678	-0.0305393	-0.00612057	0.13451	0.125281	0.123297	0.162011	-0.171666	-0.0455297	-0.00654493	0.0303372	0.13071	-0.0197973	-0.253626	-0.351101	-0.586683	-0.80559	-0.0102617
YBR201W	DER1	transport; ER-associated protein catabolic process; protein transport	molecular_function	membrane; endoplasmic reticulum; integral to membrane; Hrd1p ubiquitin ligase ERAD-L complex; endoplasmic reticulum membrane	-0.00971654	-1.26519	1.7482	1.66065	0.578986	-0.408025	0.219356	0.455967	0.137645	0.195013	0.161021	0.287077	0.275004	0.347307	0.190896	0.484583	0.663112	0.431838	0.36084	-0.139631	0.468756	0.678163	1.18863	0.456957	0.342202	0.907271	0.971046	0.703256
YBR202W	MCM7	chromatin silencing at silent mating-type cassette; double-strand break repair via break-induced replication; DNA replication; DNA unwinding involved in DNA replication; DNA replication initiation; chromatin silencing at telomere; DNA strand elongation involved in DNA replication; S phase of mitotic cell cycle; pre-replicative complex assembly involved in nuclear cell cycle DNA replication; regul…	DNA replication origin binding; DNA binding; ATP binding; helicase activity; single-stranded DNA-dependent ATPase activity; single-stranded DNA binding; hydrolase activity; chromatin binding; nucleotide binding; four-way junction helicase activity; transcription cofactor activity; nucleoside-triphosphatase activity; ATP-dependent 3'-5' DNA helicase activity; DNA helicase activity	DNA replication preinitiation complex; nucleus; replication fork protection complex; nuclear pre-replicative complex; MCM complex; cytoplasm	0.265245	2.07071	-1.26069	-0.954662	0.243519	0.751653	0.00644484	0.0697275	0.584631	0.300131	0.205794	-0.22493	0.444807	0.185645	0.40677	0.152105	-0.0941084	0.310084	0.267143	0.7666	0.480336	0.503447	0.504787	0.3481	0.305293	-0.00927945	-0.186926	-0.184523
YBR203W	COS111	signal transduction	molecular_function	mitochondrion	0.198819	-1.06	1.70427	2.18028	0.113114	0.034772	0.0501025	0.010011	0.40961	0.402433	-0.840156	0.277263	0.630054	-1.10485	-0.754101	-0.674336	0.24888	-0.464761	-1.38092	0.251448	0.0526829	-0.55965	-0.635453	0.0389174	-1.02976	-1.32681	-0.917042	-0.19909
YBR204C	LDH1	lipid catabolic process; lipid homeostasis; lipid metabolic process	hydrolase activity; triglyceride lipase activity; serine hydrolase activity; retinyl-palmitate esterase activity; hydrolase activity, acting on ester bonds	lipid particle	-0.271963	-1.52137	2.00329	1.6449	0.0833827	-0.157771	0.149823	0.428996	0.0946896	0.342634	0.340285	0.705495	0.0936123	-0.111172	0.000880027	0.170311	-0.0929636	0.0578226	0.474941	0.316229	0.201062	0.115151	0.463884	0.560865	0.438557	0.720399	0.831979	0.857232
YBR205W	KTR3	protein glycosylation; protein O-linked glycosylation; N-glycan processing	transferase activity, transferring glycosyl groups; mannosyltransferase activity; transferase activity	membrane; fungal-type vacuole membrane; nucleus; fungal-type vacuole; integral to membrane; cytoplasm	-0.0565062	-0.147237	-0.115878	-0.563648	0.0028951	-0.0183942	0.0279968	0.0170587	0.177261	0.0692859	0.00393793	0.0777972	-0.0556554	0.0904537	0.0886889	0.230392	0.521348	0.050114	0.217839	-0.0972965	0.346259	0.343646	0.164705	0.228035	-0.107883	-0.0420646	0.113096	0.00890242
YBR206W	YBR206W				0.28368	0.375793	-0.227951	-0.752367	0.3094	-0.00844236	0.174386	0.253	-0.0980135	0.135168	-0.116473	0.115381	-0.0586079	0.254276	0.210229	0.365687	0.360315	0.106669	0.0187613	-0.38918	0.172498	0.199632	0.0959735	0.0508014	-0.196549	0.182596	0.067184	-0.172623
YBR207W	FTH1	high-affinity iron ion transport; transport; iron ion homeostasis; transmembrane transport; endocytosis; ion transport	iron ion transmembrane transporter activity	vacuolar membrane; membrane; fungal-type vacuole membrane; integral to membrane; vacuole	0.166917	-0.139115	0.552248	0.791091	0.139589	0.286812	0.590873	0.458529	0.0559872	0.0736256	0.151344	0.182257	-0.0148914	0.483618	0.821436	0.987935	0.706817	-0.0250247	0.138665	0.252039	0.279775	0.26078	0.198396	0.0272499	-0.292513	0.399989	0.265688	0.101349
YBR208C	DUR1,2	arginine metabolic process; metabolic process; allantoin catabolic process; urea catabolic process	biotin carboxylase activity; ATP binding; urea carboxylase activity; catalytic activity; ligase activity; metal ion binding; hydrolase activity; nucleotide binding; carbon-nitrogen ligase activity, with glutamine as amido-N-donor; allophanate hydrolase activity	cytoplasm	-0.0496479	0.264739	-0.332568	-0.0820265	0.0803521	-0.533853	0.0787465	1.05541	1.27519	0.808114	0.552504	-0.675948	-0.105132	-0.250419	0.948362	0.905095	0.400862	0.420162	-0.0238935	-0.612152	-0.0836455	-0.356701	0.529116	0.821894	0.448392	-0.091965	-0.807001	-1.48982
YBR210W	ERV15	ER to Golgi vesicle-mediated transport; intracellular signal transduction; axial cellular bud site selection	molecular_function	membrane; ER to Golgi transport vesicle; integral to membrane	0.223583	0.082582	0.188096	0.915919	0.194454	0.289307	0.158533	0.49477	0.118645	0.277149	0.236723	0.28275	0.0248552	0.476726	0.526658	0.579783	0.775312	0.30736	0.513628	0.0758736	-0.0179609	0.548015	0.665113	0.49693	-0.0158321	0.339646	0.352157	-0.192555
YBR211C	AME1	protein localization to kinetochore; meiosis; cell division; cell cycle; attachment of spindle microtubules to kinetochore; mitosis	molecular_function	nucleus; spindle pole body; chromosome; cytoplasm; COMA complex; chromosome, centromeric region; condensed chromosome kinetochore; kinetochore	-0.295288	-0.575839	0.722233	0.954667	0.0934683	-0.612615	-0.00055956	0.0750861	-0.293278	-0.0810536	-0.262101	-0.140159	-0.171256	-0.0701679	-0.354252	-0.18093	0.0848504	-0.175094	-0.0870938	-0.517289	-0.0500151	-0.0332722	0.0348872	-0.199011	-0.298995	0.374128	-0.0316819	-0.337358
YBR212W	NGR1	3'-UTR-mediated mRNA destabilization; mitochondrion organization	RNA binding; mRNA binding; nucleotide binding; nucleic acid binding	cytoplasmic stress granule; cytoplasm; cytoplasmic mRNA processing body; perinuclear region of cytoplasm	0.0499244	-0.986425	1.02154	1.57016	-0.119678	0.011092	0.206914	0.0927759	0.209608	0.216561	0.416738	0.298351	-0.00613863	0.049946	0.260505	-0.035873	0.201911	0.44317	0.494782	1.05426	0.121179	-0.194888	-0.0232002	0.212654	0.655177	0.264008	0.118544	0.292282
YBR213W	MET8	sulfate assimilation; cellular amino acid biosynthetic process; metabolic process; siroheme biosynthetic process; oxidation-reduction process; methionine biosynthetic process; porphyrin-containing compound biosynthetic process	lyase activity; sirohydrochlorin ferrochelatase activity; precorrin-2 dehydrogenase activity; catalytic activity; ferrochelatase activity; oxidoreductase activity	cellular_component	0.18045	0.89816	-0.64916	-0.5609	0.0660718	0.17555	-0.277127	-0.42002	-0.122804	-0.0478163	-0.0728574	-0.5346	-0.0702144	0.102043	-0.276373	-0.226688	-0.394963	-0.524428	-0.599512	-0.911428	-0.0186528	-0.135779	-0.598634	-0.685652	-0.411925	-0.692206	-0.810049	-1.1651
YBR214W	SDS24	cytokinetic cell separation; endocytosis	molecular_function; adenyl nucleotide binding	cytoplasm	0.280582	-1.5533	2.05437	2.60357	-0.163452	-0.453752	0.016317	0.261507	0.661306	0.516899	0.686226	1.13629	0.260721	-0.0589815	0.57995	0.181427	1.14944	1.7335	2.39209	3.19899	-0.296488	-0.226279	1.09565	1.75577	2.32565	2.65597	2.26819	2.44371
YBR215W	HPC2	transcription elongation from RNA polymerase II promoter; regulation of transcription involved in G1/S phase of mitotic cell cycle; regulation of transcription, DNA-dependent; transcription, DNA-dependent; DNA replication-independent nucleosome assembly; chromatin modification	nucleosome binding; DNA binding	nucleus; HIR complex	0.125258	0.278134	-0.176689	-0.161418	0.0191468	0.0187362	0.194982	0.326219	0.184259	0.0770297	0.376858	0.0716152	0.0353452	0.194328	-0.148841	-0.311781	-0.157556	-0.44154	-0.255448	-0.160102	0.23904	0.0028249	-0.205429	0.243086	0.196115	-1.30508	-0.0985692	-0.0279723
YBR216C	YBP1	cellular response to oxidative stress	molecular_function	cytoplasm	0.135492	-0.413984	0.756799	0.89488	-0.113107	0.0833302	-0.0256717	-0.185381	0.199811	-0.248048	-0.141892	0.225214	0.139738	0.163874	-0.00593796	-0.169512	-0.282376	-0.322379	-0.26966	0.160905	-0.0292022	-0.192921	-0.226351	-0.242016	0.164845	-0.0486764	-0.237377	0.134399
YBR217W	ATG12	transport; CVT pathway; C-terminal protein lipidation; mitochondrion degradation; piecemeal microautophagy of nucleus; autophagy; autophagic vacuole assembly; protein transport	Atg8 ligase activity; protein tag	membrane; Atg12-Atg5-Atg16 complex; pre-autophagosomal structure; cytoplasm; pre-autophagosomal structure membrane	-0.211671	-1.02428	1.26059	1.53396	0.0013471	-0.147317	-0.103503	-0.311607	-0.47925	-0.576995	0.210989	-0.249054	0.329974	-0.0962269	-0.229671	-0.200136	-0.166013	-0.18009	-0.549384	0.170015	0.470176	0.50668	-0.0848398	-0.174445	0.0192185	0.422484	0.811622	0.659672
YBR218C	PYC2	metabolic process; gluconeogenesis	pyruvate carboxylase activity; biotin carboxylase activity; DNA binding; ATP binding; catalytic activity; ligase activity; metal ion binding; nucleotide binding	cytosol; cytoplasm	0.204723	0.338517	-0.411828	-0.482542	0.254212	0.301998	0.363166	0.270529	0.760405	0.530048	0.555247	0.318142	0.297382	0.0981962	0.0360378	-0.0689601	-0.330379	0.128522	0.0506765	0.221628	0.258992	-0.0167195	-0.186042	-0.0136747	0.222462	-0.288935	-0.562411	-0.195568
YBR220C	YBR220C	transport; acetyl-CoA transport; biological_process	molecular_function; acetyl-CoA transporter activity	membrane; integral to membrane	0.00554984	0.100473	-0.15529	-0.444434	-0.024208	0.239077	-0.0868919	0.0076121	0.258258	-0.0913192	0.0936224	-0.0375101	0.136282	0.212167	0.0420621	0.0770307	0.532405	0.104069	0.095179	0.125254	0.0810331	0.464416	0.146073	-0.0093792	-0.226588	-0.0139543	-0.0895748	-0.0752094
YBR221C	PDB1	metabolic process; glycolysis; acetyl-CoA biosynthetic process from pyruvate; oxidation-reduction process	catalytic activity; pyruvate dehydrogenase (acetyl-transferring) activity; oxidoreductase activity	mitochondrial matrix; mitochondrial nucleoid; mitochondrion; mitochondrial pyruvate dehydrogenase complex	-0.191484	-0.337682	0.249703	0.655606	-0.0872943	0.0673539	0.0903765	0.143704	0.347539	0.092762	0.42007	0.371491	0.243486	-0.0733559	-0.0553969	0.0260001	0.0209468	0.0371384	0.0747925	0.469826	0.257818	0.070481	-0.0932854	-0.0188144	0.404381	0.389644	-0.000463907	0.680809
YBR222C	PCS60	metabolic process; biological_process	mRNA binding; AMP binding; catalytic activity; ligase activity	membrane; integral to membrane; peroxisomal matrix; peroxisome; cytoplasm; peroxisomal membrane	-0.28633	-0.627979	0.381922	0.802818	-0.298752	-0.271085	-0.43343	-0.233282	0.00542632	-0.300138	-0.111045	-0.00410589	-0.157893	-0.290794	-0.133093	-0.321156	-0.613625	-0.27077	-0.148455	0.632645	0.103382	-0.33078	-0.215785	0.00643507	0.131518	0.105739	0.111748	0.845188
YBR223C	TDP1	DNA repair; nucleic acid phosphodiester bond hydrolysis; response to DNA damage stimulus	exonuclease activity; 5'-tyrosyl-DNA phosphodiesterase activity; phosphoric diester hydrolase activity; hydrolase activity; 3'-tyrosyl-DNA phosphodiesterase activity; nuclease activity	nucleus	0.483483	-0.425231	1.24493	1.70016	0.0016053	0.188044	0.0615826	0.438963	0.0253336	0.107244	0.0215304	0.32835	0.483766	-0.0787243	0.681209	0.264242	0.393372	0.0888035	0.26006	0.990065	0.610608	0.326834	0.323075	0.690016	0.441009	0.218734	-0.0220912	0.524408
YBR225W	YBR225W	biological_process	molecular_function	cellular_component	0.161971	1.93522	0.233693	0.928985	-0.472154	0.0500445	0.101841	-0.273967	-0.0487364	0.0073252	-0.245694	-0.0848842	0.759914	0.746574	0.690273	0.495573	0.144561	0.196199	0.0515002	0.885246	0.326615	0.0690272	0.0919185	0.231803	0.224459	0.0597433	0.195806	0.266808
YBR227C	MCX1	protein folding; protein refolding	molecular_function; ATP binding; unfolded protein binding; nucleotide binding; nucleoside-triphosphatase activity	mitochondrial matrix; mitochondrion	0.0529569	0.351799	-1.00213	-0.73585	-0.0219835	0.0813996	0.0379227	-0.0377363	-0.0311628	0.0247494	-0.0415995	-0.12204	-0.120811	0.120522	0.00145918	-0.0733098	-0.0847599	-0.121181	-0.0773867	-0.392851	-0.022455	-0.0287927	-0.286123	-0.0240046	-0.165553	-0.220263	-0.229034	-0.237569
YBR228W	SLX1	DNA repair; nucleic acid phosphodiester bond hydrolysis; DNA-dependent DNA replication; response to DNA damage stimulus; DNA recombination	metal ion binding; hydrolase activity; 5'-flap endonuclease activity; endonuclease activity; nuclease activity	nucleus; Slx1-Slx4 complex	-0.315811	-0.551915	0.541951	0.896792	0.099259	0.435197	0.355564	0.363045	0.152062	0.268286	0.351175	0.207241	0.0800449	0.0145746	-0.100991	-0.0646505	-0.00495914	-0.169156	-0.0117007	-0.0151131	-0.143967	-0.340486	-0.483653	-0.261044	-0.084119	-0.0695871	-0.0657795	-0.059889
YBR229C	ROT2	metabolic process; carbohydrate metabolic process; fungal-type cell wall biogenesis	hydrolase activity, hydrolyzing O-glycosyl compounds; carbohydrate binding; hydrolase activity; catalytic activity; glucan 1,3-alpha-glucosidase activity; hydrolase activity, acting on glycosyl bonds	endoplasmic reticulum lumen; endoplasmic reticulum; glucosidase II complex; mitochondrion	-0.129729	0.727721	-0.917522	-1.0023	0.100136	-0.328053	-0.159994	-0.038214	0.0746561	0.0662445	-0.115823	0.108681	0.0693997	0.0928855	0.27688	0.470564	0.594543	-0.00736273	0.360317	0.329465	-0.219571	0.0563422	-0.0787076	-0.0748901	-0.0102641	0.364426	0.183284	0.303574
YBR230C	OM14	biological_process	molecular_function	membrane; integral to mitochondrial outer membrane; integral to membrane; mitochondrial outer membrane; mitochondrion	0.056654	-1.1978	1.64086	2.40995	0.116711	-0.537711	-0.331002	0.240879	0.226486	0.338404	0.137046	0.740217	0.112317	-0.046114	0.059625	0.277664	0.673495	1.2081	2.01207	1.86923	-0.259928	-0.0134528	0.857005	1.77701	2.15663	2.68413	2.82315	2.96129
YBR231C	SWC5	chromatin remodeling; regulation of transcription, DNA-dependent; histone exchange; transcription, DNA-dependent; chromatin modification	molecular_function	Swr1 complex; nucleus; cytosol	0.0384575	0.576003	-0.741853	-1.05493	0.030952	-0.124492	-0.0130763	-0.0780246	0.0623979	0.267531	0.0705838	0.152414	-0.238031	0.283513	0.505582	0.319478	0.419977	0.0504098	0.381045	0.235704	-0.0858218	-0.0257039	0.104925	0.186092	0.134228	0.29206	0.00389793	-0.106725
YBR233W	PBP2	telomere maintenance via telomere shortening	mRNA binding; RNA binding	nucleus; ribonucleoprotein complex; cytoplasm	-0.170623	-0.12383	-0.214912	-0.363945	-0.29411	0.0205242	0.0494217	0.137657	0.426718	-0.105575	0.331538	0.313413	0.358615	-0.127469	-0.0821796	-0.293914	-0.0901209	0.640747	0.319506	0.632375	0.147156	0.214101	-0.0127743	0.334569	-0.291151	0.18202	-0.124053	0.152252
YBR233W-A	DAD3	mitotic spindle organization in nucleus; chromosome segregation; regulation of microtubule polymerization or depolymerization; cell division; cell cycle; mitosis	microtubule binding	cytoskeleton; mitotic spindle; DASH complex; nucleus; microtubule; chromosome; cytoplasm; chromosome, centromeric region; spindle; kinetochore; condensed chromosome kinetochore	-0.213945	-0.0815348	-0.664426	-0.877723	-0.264931	0.0513776	-0.187273	-0.0801733	-0.340847	-0.348668	-0.422361	-0.251287	-0.420322	-0.104319	-0.272591	-0.234084	0.145406	-1.0206	-0.447084	-0.787107	-1.71149	-0.166862	0.202693	-0.609963	-0.993965	-0.344897	0.0753948	-0.982979
YBR234C	ARC40	regulation of actin filament polymerization; actin filament organization; actin nucleation	actin binding; ubiquitin binding	cytoskeleton; actin cortical patch; Arp2/3 protein complex; cytoplasm	0.149047	-0.0186078	0.353645	0.321807	0.224464	-0.286983	-0.0119851	0.16356	0.283364	0.591578	0.465831	0.549949	-0.162632	-0.0388028	0.134996	0.0866204	0.152395	0.355997	0.571545	0.0993695	-0.00922991	-0.291455	-0.101009	0.267065	0.372427	0.425026	0.359342	0.415544
YBR235W	VHC1	vacuolar transmembrane transport; transport; transmembrane transport; potassium ion homeostasis	potassium:chloride symporter activity	membrane; fungal-type vacuole membrane; integral to membrane; integral to vacuolar membrane	-0.134055	0.320106	-0.360702	-0.392426	-0.0655874	0.178973	0.197565	0.0608084	-0.0715536	-0.317842	-0.209214	-0.172262	0.271491	0.0605249	0.293631	0.288154	0.355663	-0.0592213	0.177696	0.579426	0.0647688	0.390749	0.265656	0.111537	0.202868	0.107712	0.317928	0.444552
YBR236C	ABD1	mRNA processing; 7-methylguanosine mRNA capping; methylation; transcription from RNA polymerase II promoter; RNA (guanine-N7)-methylation	RNA binding; methyltransferase activity; mRNA (guanine-N7-)-methyltransferase activity; transferase activity	nucleus; cytosol; DNA-directed RNA polymerase II, holoenzyme	-0.0161648	-0.325377	0.320017	0.213783	0.272525	0.195614	0.285393	0.45265	0.294153	0.288637	0.247774	0.154618	0.111961	0.370479	0.376669	0.3687	0.410961	0.188436	0.374487	0.199061	0.0860195	0.22542	0.316738	0.321028	0.0876437	0.174844	0.158677	-0.0368765
YBR237W	PRP5	mRNA processing; mRNA branch site recognition; RNA splicing	ATP binding; hydrolase activity; nucleotide binding; helicase activity; nucleic acid binding; ATP-dependent helicase activity; RNA-dependent ATPase activity	nucleus	0.0066727	-0.114996	0.417566	1.27771	-0.443582	0.0886382	-0.00807749	-0.144346	-0.0533915	0.0805735	0.0664093	-0.125352	-0.211999	-0.0131187	-0.0276905	-0.409253	-0.160092	-0.119644	-0.313091	0.0583257	-0.0247156	-0.0578879	0.579059	-0.108285	0.0582285	-0.475257	0.0783501	-0.0635455
YBR238C	YBR238C	aerobic respiration	molecular_function	membrane; mitochondrial inner membrane; mitochondrion; cytoplasm; integral to mitochondrial membrane	0.282115	1.31954	-1.37999	-2.3902	-0.0955567	1.7612	0.212435	-0.640456	-0.118499	-0.71978	-0.235161	-1.08067	0.4243	0.451429	-0.143695	-0.546837	-0.934422	-0.884137	-1.08402	0.062608	-0.098167	0.494457	-0.435778	-0.737779	-1.23467	-1.03494	-1.61411	-1.77367
YBR239C	ERT1	regulation of transcription from RNA polymerase II promoter; signal transduction; gluconeogenesis; regulation of transcription, DNA-dependent; transcription, DNA-dependent; biological_process; transcription from RNA polymerase II promoter	DNA binding; sequence-specific DNA binding RNA polymerase II transcription factor activity; metal ion binding; sequence-specific DNA binding; zinc ion binding; signal transducer activity	nucleus; cytoplasm	-0.84683	-0.292368	-0.484662	-0.422551	-0.0359314	0.590074	0.246404	-0.466718	-0.126595	-0.183524	0.135439	-0.128015	0.433961	-0.476341	-0.0375975	-0.166117	-0.699051	-0.0544279	-0.558963	0.194276	0.00784236	-0.142338	-0.234145	-0.317591	-0.224884	-0.830887	-0.744784	-0.675259
YBR240C	THI2	thiamine biosynthetic process; positive regulation of transcription from RNA polymerase II promoter; regulation of transcription, DNA-dependent; transcription, DNA-dependent; positive regulation of thiamine biosynthetic process; transcription from RNA polymerase II promoter	RNA polymerase II core promoter proximal region sequence-specific DNA binding; metal ion binding; DNA binding; sequence-specific DNA binding RNA polymerase II transcription factor activity; zinc ion binding	nucleus	-0.29449	-0.724289	1.18163	1.66472		0.746187	-0.783044	-0.227641	-0.0897586	-0.0966455	-0.238512	0.552443	0.189682	1.02898	-0.498721	0.132593	0.732378	1.74835	-1.00576	1.64374		-0.166393	0.284654	0.48026	0.514242	-0.35054	0.31707	1.40303
YBR241C	YBR241C	transport; transmembrane transport	transporter activity; transmembrane transporter activity; substrate-specific transmembrane transporter activity	vacuolar membrane; membrane; fungal-type vacuole membrane; integral to membrane; vacuole	0.169993	-1.07548	1.71723	2.12163	-0.192764	-0.323462	-0.431731	-0.0557734	-0.136032	-0.164046	0.0749382	0.706702	-0.152585	-0.105563	-0.0162012	0.432876	0.730886	0.35313	0.712224	1.7647	-0.09667	-0.257313	-0.0405788	0.280009	0.55483	1.20763	1.69832	2.14105
YBR242W	YBR242W	metabolic process; biological_process	molecular_function; metal ion binding; phosphoric diester hydrolase activity; catalytic activity	nucleus; cytoplasm	-0.095183	0.0565056	-0.572424	-1.21785	0.199414	0.332206	0.139775	-0.0304767	-0.285545	-0.047619	-0.234102	-0.320991	0.00308146	-0.0372883	-0.377541	-0.165352	-0.636399	-0.570411	-0.654658	-1.09567	0.221442	-0.00883734	-0.149593	-0.31001	-0.509712	-0.684777	-0.845174	-0.854118
YBR243C	ALG7	protein glycosylation; protein N-linked glycosylation; aerobic respiration	UDP-N-acetylglucosamine-dolichyl-phosphate N-acetylglucosaminephosphotransferase activity; transferase activity, transferring glycosyl groups; transferase activity; phospho-N-acetylmuramoyl-pentapeptide-transferase activity	membrane; endoplasmic reticulum; UDP-N-acetylglucosamine transferase complex; integral to membrane; endoplasmic reticulum membrane	-0.112703	-0.330541	0.187109	0.183761	0.139496	-0.16135	0.0287266	-0.0745872	0.0314892	0.0553965	-0.118415	0.420743	-0.264942	0.0834069	-0.0200831	-0.185936	0.303547	-0.0395741	0.00606427	-0.0200104	-0.372262	0.129024	-0.192543	-0.569375	-0.468873	0.120416	0.0843781	-0.563278
YBR244W	GPX2	response to oxidative stress; cellular response to oxidative stress; oxidation-reduction process	phospholipid-hydroperoxide glutathione peroxidase activity; peroxidase activity; glutathione peroxidase activity; oxidoreductase activity	nucleus; extrinsic to mitochondrial outer membrane; extrinsic to mitochondrial inner membrane; cytoplasm	-0.35662	-0.237701	0.179336	0.208155	-0.11611	-0.719301	-0.16261	0.199978	0.0221982	0.0209134	0.149138	-0.400597	-0.271225	-0.0152609	-0.29834	-0.0184332	0.402114	-0.114661	0.146489	-0.861318	-0.113218	0.259699	0.783584	0.00269337	-0.370918	0.092703	0.318862	-0.283323
YBR245C	ISW1	regulation of transcriptional start site selection at RNA polymerase II promoter; termination of RNA polymerase I transcription; heterochromatin maintenance involved in chromatin silencing; regulation of transcription by chromatin organization; chromatin remodeling; regulation of transcription, DNA-dependent; termination of RNA polymerase II transcription; transcription, DNA-dependent; nucleosome…	rDNA binding; DNA binding; ATP binding; helicase activity; nucleic acid binding; nucleosome binding; hydrolase activity; chromatin binding; nucleotide binding; hydrolase activity, acting on acid anhydrides, in phosphorus-containing anhydrides; ATPase activity	nucleus; nucleolar chromatin; Isw1 complex	0.0569797	0.227052	-0.793938	-0.739236	0.320274	0.0511711	0.131174	-0.0322832	-0.177338	-0.229386	-0.169958	-0.152249	0.165062	-0.0582111	-0.0112991	-0.189552	-0.693066	-0.372839	-0.375783	-0.363755	0.109534	0.0876078	-0.222812	0.181796	0.104743	-0.241069	-0.687957	-0.654151
YBR246W	RRT2	peptidyl-diphthamide biosynthetic process from peptidyl-histidine; endocytic recycling	molecular_function	endosome; cytoplasm	-0.189115	-0.20244	0.196567	-0.0180308	0.483505	-0.0420782	0.230332	0.157013	0.272313	0.274912	0.227778	0.0741616	-0.0964909	0.17452	-0.0307075	-0.0583209	-0.0320487	-0.0192793	-0.102864	-0.81019	-0.169074	-0.170447	-0.291844	-0.341496	-0.335634	-0.462692	-0.641149	-0.667131
YBR247C	ENP1	ribosome biogenesis; endonucleolytic cleavage in ITS1 to separate SSU-rRNA from 5.8S rRNA and LSU-rRNA from tricistronic rRNA transcript (SSU-rRNA, 5.8S rRNA, LSU-rRNA); rRNA processing	snoRNA binding	nucleus; 90S preribosome; nucleolus; preribosome, small subunit precursor; cytoplasm	0.0381437	1.59577	-2.40347	-2.92256	0.132536	0.828087	0.138093	-0.635542	-0.260517	-0.17904	-0.10103	-0.983482	0.331812	0.179377	-0.255241	-0.453926	-0.495647	-0.6021	-1.04624	-1.16522	0.219523	0.316848	-0.405301	-0.379203	-0.497848	-1.03468	-1.28413	-1.06742
YBR248C	HIS7	glutamine metabolic process; cellular amino acid biosynthetic process; metabolic process; histidine biosynthetic process; response to stress	transferase activity, transferring pentosyl groups; lyase activity; oxo-acid-lyase activity; transferase activity; catalytic activity; imidazoleglycerol-phosphate synthase activity	intracellular; cytoplasm	0.238172	1.31493	-1.6742	-2.31032	0.589692	0.0800162	0.560068	0.375548	0.373	0.463033	0.311904	0.132142	0.259529	0.366857	0.337463	0.0876695	0.0764922	0.261209	0.0981475	-0.276947	-0.0673222	-0.345543	-0.418774	-0.142229	-0.514891	-0.490373	-0.776558	-0.794763
YBR249C	ARO4	cellular amino acid biosynthetic process; chorismate biosynthetic process; biosynthetic process; aromatic amino acid family biosynthetic process; response to stress	3-deoxy-7-phosphoheptulonate synthase activity; catalytic activity; transferase activity	nucleus; cytoplasm	-0.0275793	-0.347475	-0.374766	-0.663578	0.278757	0.134248	0.571423	0.555459	0.682606	0.509833	0.604575	0.272973	0.0846843	0.157378	-0.0873757	0.123224	-0.137513	-0.0591885	-0.0112717	-0.572159	0.359881	0.0278686	-0.318889	0.117402	-0.10469	-0.411343	-0.706648	-0.609789
YBR251W	MRPS5	mitochondrial translation; translation	RNA binding; structural constituent of ribosome	ribosome; ribonucleoprotein complex; mitochondrial small ribosomal subunit; mitochondrion	-0.0692856	-0.85565	0.855964	0.774429	0.021432	0.192146	-0.106442	-0.127851	-0.427726	0.0361218	0.0625903	0.083672	-0.1184	-0.324657	-0.341507	-0.0820949	-0.289705	-0.188748	-0.181614	-0.184186	0.298975	0.15835	0.133603	0.0253401	0.156769	0.253361	0.232886	0.417617
YBR252W	DUT1	dUTP catabolic process; pyrimidine deoxyribonucleoside triphosphate catabolic process; dUMP biosynthetic process; dUTP metabolic process; nucleotide metabolic process; dITP catabolic process	dITP diphosphatase activity; metal ion binding; hydrolase activity; dUTP diphosphatase activity	nucleus; cytoplasm	-0.0164368	0.435201	-1.05741	-1.59358	0.321982	0.151737	0.0933401	-0.178622	-0.145048	-0.0188069	-0.18951	-0.120537	0.134668	0.480096	0.138919	0.0699893	0.305008	-0.256548	-0.160741	-0.406975	-0.178525	0.177113	0.00408073	-0.11823	-0.536401	-0.838243	-0.308676	-0.849525
YBR253W	SRB6	regulation of transcription from RNA polymerase II promoter; positive regulation of transcription from RNA polymerase II promoter; regulation of transcription, DNA-dependent; transcription, DNA-dependent	molecular_function; RNA polymerase II transcription cofactor activity	core mediator complex; nucleus; mediator complex	0.0451867	0.358536	-0.348627	-0.401341	-0.210559	-0.412024	-0.097467	-0.175837	-0.375922	-0.129892	-0.461091	-0.0669054	-0.0400253	-0.0470077	-0.0657145	0.422525	0.0318165	-0.119568	-0.0301559	-0.12703	-0.284889	-0.0952023	-0.0110386	-0.102188	-0.355276	0.187964	0.000294878	-0.0764083
YBR254C	TRS20	transport; autophagy; ER to Golgi vesicle-mediated transport; vesicle-mediated transport	molecular_function	endoplasmic reticulum; Golgi apparatus; intracellular; pre-autophagosomal structure; TRAPP complex	0.103143	0.579443	-0.692295	-0.59408	0.329807	0.236225	-0.124168	0.031823	-0.183664	0.193569	-0.219721	-0.161289	0.436323	0.260959	0.241499	0.237387	0.482787	0.125366	0.0917055	-0.124788	0.520744	0.293665	0.499123	0.432478	-0.12331	0.395815	0.373421	0.308766
YBR255C-A	YBR255C-A	biological_process	molecular_function	cellular_component; membrane; integral to membrane			0.910123	2.29251	0.477413	0.109143	-0.190906	0.301159	-0.167823	0.0654071	0.737149	0.0480005		0.976054	-0.535177	0.418414	1.90056		0.596709	1.52726	-0.285073	0.125849	1.33909	0.174022	0.497854		-0.367706
YBR255W	MTC4	biological_process	molecular_function	membrane; integral to membrane; cytoplasm	-0.142181	0.117539	-0.0510344	-0.122829	-0.156184	-0.154331	-0.0980802	-0.194797	0.140001	-0.0559644	-0.0511189	-0.0158878	-0.250881	-0.149078	-0.0247624	-0.0528402	-0.185787	-0.245729	-0.0635391	0.000295202	-0.213735	-0.447058	-0.310106	-0.286694	-0.0123664	-0.153784	0.000587346	-0.0149444
YBR256C	RIB5	riboflavin biosynthetic process; oxidation-reduction process	transferase activity; oxidoreductase activity; riboflavin synthase activity	cellular_component	0.0355228	-0.470581	0.987443	1.07568	0.283781	-0.0935054	0.407022	0.274059	0.151485	0.270824	-0.154583	0.413643	-0.216782	0.282594	0.300248	0.309967	0.582602	0.275945	0.272872	-0.252654	0.0382666	0.352133	0.512237	0.0452177	-0.182754	0.791633	0.709414	0.105315
YBR257W	POP4	intronic box C/D snoRNA processing; mRNA cleavage; rRNA processing; tRNA processing	RNA binding; rRNA primary transcript binding; ribonuclease MRP activity; ribonuclease activity; ribonuclease P activity	ribonuclease MRP complex; nucleus; ribonuclease P complex; nucleolar ribonuclease P complex	0.203434	1.02511	-0.547934	-0.853755	0.386684	0.4867	-0.0706649	-0.1289	-0.410694	-0.309613	-0.443621	-0.291318	0.226069	-0.136683	-0.121411	0.0365953	-0.386595	-0.675031	-0.783052	-0.978237	0.247283	-0.0496135	-0.55674	-0.496584	-0.744283	-0.786594	-0.358101	-0.803448
YBR258C	SHG1	histone H3-K4 methylation	histone methyltransferase activity (H3-K4 specific)	Set1C/COMPASS complex; nucleus	-0.00201779	-0.263406	0.514926	0.380814	0.0248669	-0.155814	0.132918	0.0201535	-0.160328	-0.338154	-0.198105	-0.20141	-0.18671	0.176072	-0.0477298	-0.0261356	0.172998	-0.0778905	-0.0150836	-0.411016	0.0698862	0.292228	0.363934	-0.0950558	-0.281405	0.2848	0.644873	0.258896
YBR259W	YBR259W	biological_process	molecular_function	cellular_component	-0.0228379	-0.245038	0.382679	-0.0586418	-0.0350855	-0.00970737	0.29626	0.0728064	-0.243999	-0.393439	-0.232941	-0.0246415	-0.0286372	-0.0492534	-0.116604	0.167304	-0.782356	-0.128843	-0.832303	-0.426104	-0.128426	0.201237	0.276232	-0.164172	-0.131085	-0.811722	-0.317279	-0.77082
YBR260C	RGD1	signal transduction; osmosensory signaling pathway; response to acid; positive regulation of GTPase activity	Rho GTPase activator activity; phosphatidylinositol-3,5-bisphosphate binding; phosphatidylinositol-4-phosphate binding; phosphatidylinositol-3-phosphate binding; phosphatidylinositol-5-phosphate binding; phosphatidylinositol-4,5-bisphosphate binding; GTPase activator activity	actin cortical patch; intracellular; mating projection tip; cytoplasm; cellular bud	-0.243016	-0.240673	-0.284829	-0.335434	-0.510929	0.028202	-0.189586	-0.177221	0.198385	-0.214899	0.0479102	-0.144843	0.0321652	-0.0384452	-0.23993	-0.218092	-0.0390668	0.0516072	-0.281723	0.291719	-0.16738	-0.242969	-0.325521	-0.266155	-0.248806	-0.506538	-0.519585	-0.201003
YBR261C	TAE1	cytoplasmic translation; N-terminal peptidyl-proline dimethylation; methylation	N-terminal protein N-methyltransferase activity; methyltransferase activity; transferase activity	cytosol; cytoplasm	-0.0063745	0.987842	-1.56318	-1.90231	-0.23322	0.0767974	0.230057	-0.189458	0.298069	0.198635	0.108876	-0.153821	-0.0646025	0.205872	0.12881	0.240663	0.0745228	0.132594	-0.165358	-0.15217	0.154348	0.105902	-0.355859	-0.26929	-0.0577533	-0.68286	-0.647851	-0.54998
YBR262C	AIM5	cristae formation	molecular_function	membrane; mitochondrial inner membrane; integral to membrane; mitochondrial crista junction; mitochondrion; integral to mitochondrial inner membrane	0.107891	-0.21917	0.517114	0.312066	0.231091	-0.164497	0.00217727	-0.387665	-0.320078	0.0822691	-0.236867	0.110939	-0.393159	0.319078	0.164528	-0.0081474	0.307789	-0.0135785	0.174222	-0.11672	-0.344311	0.0160231	-0.34741	-0.210423	-0.343462	0.303608	0.493124	0.0163507
YBR263W	SHM1	glycine metabolic process; one-carbon metabolic process; tetrahydrofolate interconversion; serine family amino acid biosynthetic process; L-serine metabolic process	glycine hydroxymethyltransferase activity; catalytic activity; transferase activity; pyridoxal phosphate binding	mitochondrion	0.0509565	0.639152	-0.833398	-1.13732	-0.0545831	0.336136	-0.00210195	-0.0352902	0.0714458	-0.202392	-0.248286	-0.198271	0.226954	0.255896	0.340581	0.368342	0.0914472	-0.124347	-0.214375	0.14895	-0.257465	0.0387615	-0.642805	-0.2695	-0.308621	-0.305787	-0.698236	-0.831583
YBR264C	YPT10	transport; small GTPase mediated signal transduction; Golgi organization; protein transport	nucleotide binding; guanyl nucleotide binding; GTP binding; GTPase activity	membrane; plasma membrane; cytoplasm	-0.163865	-0.133133	-0.0512837	0.0665214	0.0957722	-0.308929	-0.119307	-0.18812	0.0819149	0.100563	-0.129158	0.264778	-0.315482	-0.153904	-0.148014	-0.0230539	0.134527	-0.051641	0.119208	-0.227532	-0.705296	-0.602841	-0.657431	-0.248116	-0.479142	-0.0922583	-0.239721	-0.511938
YBR265W	TSC10	metabolic process; sphingolipid metabolic process; sphingolipid biosynthetic process; oxidation-reduction process; 3-keto-sphinganine metabolic process; lipid metabolic process	oxidoreductase activity, acting on NAD(P)H; 3-dehydrosphinganine reductase activity; oxidoreductase activity	membrane; endoplasmic reticulum; integral to membrane; endoplasmic reticulum membrane; mitochondrial outer membrane; cytoplasm	-0.0766185	0.183448	-0.486751	-0.952581	0.0160232	-0.027857	-0.0468843	-0.0947687	0.0560336	0.0464013	0.187788	0.223267	-0.0603578	0.0165613	0.204712	0.0485237	0.16686	0.195943	0.21487	0.485047	0.414872	-0.0329532	-0.0852385	0.260298	0.206033	0.168174	0.115284	0.515587
YBR267W	REI1	mitotic cell cycle; ribosome biogenesis; nucleocytoplasmic transport; budding cell bud growth; ribosomal large subunit biogenesis	metal ion binding; sequence-specific DNA binding	cytosolic large ribosomal subunit; preribosome, large subunit precursor; cytoplasm	0.314851	1.26865	-2.0805	-2.86213	0.382324	1.23323	-0.386013	-0.381821	-0.5519	-0.27481	-0.254591	-1.32544	-0.0270997	-0.216054	-0.427116	-0.485739	-0.82019	-1.07553	-1.28031	-1.52381	0.276281	0.2054	-0.683264	-0.281133	-0.533919	-1.49693	-1.55225	-1.42837
YBR268W	MRPL37	sporulation resulting in formation of a cellular spore; mitochondrial translation	structural constituent of ribosome	ribosome; mitochondrial large ribosomal subunit; ribonucleoprotein complex; mitochondrion	0.228109	0.0903088	0.451693	0.0122622	0.339386	0.0208229	0.0178699	0.0827318	-0.484606	0.180412	-0.172153	0.169898	0.0911748	0.285445	0.567476	-0.0203732	0.195025	0.0619848	0.146238	0.187957	0.261857	0.68167	0.661093	0.787781	0.434807	0.830005	0.873018	0.54711
YBR269C	FMP21	biological_process	molecular_function	mitochondrion	-0.134984	-1.21712	1.44338	1.66377	0.117051	-0.759797	-0.18855	-0.0171345	-0.13562	0.046552	0.0612903	0.127789	-0.346812	0.00160129	0.0137068	0.122634	0.288683	0.434576	0.607693	0.429334	-0.154689	-0.193989	-0.0144601	0.55433	0.573424	0.656492	0.818825	1.1684
YBR270C	BIT2	biological_process	molecular_function	cellular_component	0.0531687	-0.231174	0.633191	0.930317	0.291425	0.311715	0.0870203	-0.0491309	0.0770828	0.381306	0.377923	-0.062695	0.341195	-0.223121	0.106514	-0.0645146	0.251469	0.213124	0.34265	0.0105999	0.237566	-0.122199	0.0769994	0.210782	-0.0878065	0.161297	-0.233775	0.0813459
YBR271W	EFM2	peptidyl-lysine methylation	protein-lysine N-methyltransferase activity; S-adenosylmethionine-dependent methyltransferase activity	cytoplasm	-0.109254	1.37915	-2.05375	-2.74869	-0.00690727	0.949776	0.176391	-0.567116	-0.722471	-0.539387	-0.583102	-1.26026	0.0624064	-0.194089	-0.496299	-0.407688	-0.845699	-0.980181	-1.79859	-1.21322	-0.157459	0.0630766	-0.240837	-0.58496	-1.05061	-0.874444	-1.43797	-1.14349
YBR272C	HSM3	proteasome regulatory particle assembly; DNA repair; mismatch repair; response to DNA damage stimulus	molecular_function	nucleus; cytosol; cytoplasm; proteasome regulatory particle, base subcomplex	-0.113634	-0.553804	0.734775	0.940907	0.0236918	-0.0122444	0.179871	0.0384638	0.392208	-0.0213487	-0.000644742	0.205602	-0.140763	-0.292892	0.270895	-0.20593	-0.164622	-0.165711	0.0270366	0.0444946	0.0200348	0.111462	-0.32728	0.0687309	-0.2108	0.0167968	-0.143343	0.293876
YBR273C	UBX7	sporulation resulting in formation of a cellular spore; ubiquitin-dependent protein catabolic process	molecular_function	endoplasmic reticulum; nuclear envelope	-0.252835	-0.304488	0.330539	0.292537	0.129934	-0.153019	0.157694	0.00810637	0.550197	0.699269	0.514484	0.529863	-0.0399506	-0.0175936	0.286346	-0.0176804	0.300043	0.26448	0.269819	0.0385388	-0.0886474	-0.0163888	-0.0822805	-0.0216319	0.363309	0.440866	0.208233	0.23657
YBR274W	CHK1	phosphorylation; DNA damage checkpoint; protein phosphorylation; cell cycle; response to DNA damage stimulus; replication fork protection	ATP binding; protein serine/threonine kinase activity; kinase activity; nucleotide binding; protein kinase activity; transferase activity; transferase activity, transferring phosphorus-containing groups	nucleus	-0.0848062	-0.239732	0.462327	0.513648	-0.222141	-0.0822868	-0.0757043	0.269729	0.492024	-0.121156	0.225472	0.104243	0.0723002	-0.15932	-0.377121	-0.000405669	-0.0497057	0.0232412	-0.0136923	0.140623	-0.0332454	0.294231	0.163029	0.129827	-0.0134535	0.322491	0.179993	0.260309
YBR275C	RIF1	telomere capping; chromatin silencing at silent mating-type cassette; cell cycle; telomere maintenance	telomeric DNA binding	chromosome, telomeric region; nucleus; nuclear telomere cap complex; chromosome	0.0683181	1.39465	-1.84298	-2.00684	-0.14839	-0.200187	-0.307483	-0.555307	-0.417068	-0.0947647	-0.180809	-0.284086	0.00888604	-0.244907	-0.0611679	-0.429112	-0.355786	-0.179041	-0.381696	-0.269828	-0.537849	0.00797538	-0.395484	-0.309244	-0.443035	-0.74989	-0.861614	-1.01279
YBR276C	PPS1	adaptation of signaling pathway by response to pheromone involved in conjugation with cellular fusion; peptidyl-tyrosine dephosphorylation; protein dephosphorylation; dephosphorylation; regulation of pheromone-dependent signal transduction involved in conjugation with cellular fusion; inactivation of MAPK activity; cell cycle; nuclear cell cycle DNA replication	MAP kinase tyrosine/serine/threonine phosphatase activity; hydrolase activity; protein tyrosine/serine/threonine phosphatase activity; phosphoprotein phosphatase activity; protein tyrosine phosphatase activity; phosphatase activity	cellular_component; nucleus; cytosol	0.00218073	0.490664	-1.04217	-1.19717	0.0623945	-0.143331	0.0173549	0.331455	0.000237101	0.0374951	0.0915427	0.27788	-0.20831	-0.0784153	-0.122197	0.0905175	-0.0696591	-0.0072502	-0.0522886	-0.268609	-0.287985	-0.160619	-0.270022	-0.179122	-0.295805	-0.807817	-0.347211	-0.317633
YBR277C	YBR277C				0.322707	-0.54332	0.161444	0.236538	-0.442974	-0.140767	-0.148336	0.505771	-0.662425	0.104958	0.577708	-0.430839	-0.318118	1.89054	-0.370915	-0.167019	1.65128	1.10611	0.274201	0.154359		-0.224485	0.310649	0.211674	-0.15521	1.64518	-0.559101	-0.506254
YBR278W	DPB3	leading strand elongation; error-prone translesion synthesis; DNA replication; DNA-dependent DNA replication; replicative senescence; heterochromatin organization involved in chromatin silencing	single-stranded DNA binding; DNA-directed DNA polymerase activity; protein heterodimerization activity; nucleotidyltransferase activity; transferase activity; double-stranded DNA binding	nucleus; epsilon DNA polymerase complex	0.214695	0.0182434	0.202199	0.357057	0.24058	-0.249017	-0.0576889	0.00672851	0.202659	0.0648461	0.0991855	0.0987616	-0.304198	0.170391	0.337254	0.133164	0.46494	0.195751	0.219722	0.281682	0.392707	0.208785	0.178329	0.29033	0.405098	0.305803	0.162998	0.0157005
YBR279W	PAF1	positive regulation of histone H3-K36 trimethylation; regulation of transcription-coupled nucleotide-excision repair; regulation of transcription, DNA-dependent; transcription from RNA polymerase I promoter; mRNA 3'-end processing; negative regulation of transcription from RNA polymerase II promoter; transcription elongation from RNA polymerase II promoter; regulation of transcription from RNA po…	RNA polymerase II transcription factor binding transcription factor activity; chromatin binding; RNA polymerase II core promoter sequence-specific DNA binding transcription factor activity; RNA polymerase II core binding; TFIIF-class binding transcription factor activity	nucleoplasm; nucleus; transcriptionally active chromatin; Cdc73/Paf1 complex	-0.02332	-0.0731677	0.210639	0.373094	0.108952	-0.161215	-0.0135644	-0.0546722	-0.0626018	-0.0447291	-0.179959	-0.141804	-0.244959	-0.0857796	-0.212528	-0.305938	-0.261003	-0.188474	-0.255423	-0.672214	0.153125	-0.311257	-0.328035	-0.627771	-0.415105	-0.444516	-0.741568	-0.629973
YBR280C	SAF1	SCF-dependent proteasomal ubiquitin-dependent protein catabolic process; protein ubiquitination	ubiquitin-protein ligase activity	SCF ubiquitin ligase complex	0.216267	-0.966397	1.57501	1.90599	0.0255898	-0.57433	0.0532025	0.0452468	-0.0458183	0.0294098	-0.0374195	0.54538	0.261229	-0.041367	0.657599	0.579792	0.118994	0.603999	0.88911	1.09515	-0.142788	-0.189153	0.42702	0.576342	0.949835	0.985831	1.03841	1.11316
YBR281C	DUG2	proteolysis; metabolic process; glutathione catabolic process	metal ion binding; hydrolase activity; metallopeptidase activity; peptidase activity; gamma-glutamyltransferase activity; omega peptidase activity; dipeptidase activity	nucleus; cytoplasm	0.0204058	0.557253	-1.15414	-0.857483	-0.0238996	0.0641178	-0.0384942	0.0597713	0.0279668	-0.145009	0.0735309	0.291825	0.137528	-0.357039	-0.442169	-0.575539	-1.16033	-0.214016	-0.0076141	-0.0320433	-0.245102	-0.326362	-0.447942	-0.803965	-0.620264	-0.470899	-0.269545	-0.069218
YBR282W	MRPL27	mitochondrial translation	structural constituent of ribosome	ribosome; mitochondrial large ribosomal subunit; ribonucleoprotein complex; mitochondrion	0.129387	0.182709	0.137819	0.0990826	-0.00868502	-0.14975	-0.163107	-0.150341	0.0849375	0.264846	-0.0214118	0.150587	-0.270828	-0.0137074	0.0565556	0.0814646	0.0249167	-0.38656	0.0816442	-0.11047	-0.0321674	0.246567	0.270516	0.441782	0.00559159	0.16466	0.543959	0.256664
YBR283C	SSH1	SRP-dependent cotranslational protein targeting to membrane; transport; protein transport	signal sequence binding; protein transmembrane transporter activity	Ssh1 translocon complex; membrane; endoplasmic reticulum; integral to membrane; endoplasmic reticulum membrane	-0.0428178	-0.298627	-0.333121	-0.374644	0.310008	0.00815163	0.137293	0.250387	0.265056	0.24861	0.179617	0.150581	0.042732	0.226972	0.081315	0.0252118	0.630959	0.0296876	0.234255	-0.283158	0.18297	0.401608	0.176403	0.180917	-0.21983	0.187367	0.0376218	0.136101
YBR284W	YBR284W	biological_process	molecular_function; AMP deaminase activity	membrane; cellular_component; integral to membrane	-0.154851	-2.13047	2.17544	1.78369	-0.581724	0.275295	0.15395	0.00967849	0.480057	-0.879056	0.191221	1.2682	0.130538	0.397501	0.567009	0.487646	0.703172	0.632794	0.588834	2.40906	0.319999	0.519163	0.107036	2.19001	0.906814	1.62893	1.23699	1.29556
YBR285W	YBR285W	biological_process	molecular_function	cellular_component	0.234102	-1.63963	3.26294	4.70048	0.339501		0.725298	0.00394627	-0.220179	-0.0068932	-0.220232	0.302447	0.0499912	1.32126	-0.0992783	0.200237	0.479107	0.327187	0.689738	1.81328		-0.250046	-1.77854	0.22815	-0.515114	2.67641	1.47293	1.77244
YBR286W	APE3	proteolysis; vacuolar protein catabolic process	metallopeptidase activity; hydrolase activity; peptidase activity; aminopeptidase activity	fungal-type vacuole; vacuole	0.348078	0.117689	0.399851	0.523395	0.226797	0.155325	0.183536	0.18669	0.3667	0.341701	0.260239	0.598113	0.260282	0.395995	0.377432	0.524041	0.731949	0.594359	0.643039	1.3711	0.229406	0.390721	0.108904	0.26832	0.586906	1.04315	1.18194	1.8059
YBR287W	YBR287W	transport; transmembrane transport; biological_process	molecular_function	membrane; endoplasmic reticulum; integral to membrane	0.288583	-0.234821	0.744977	0.992664	0.526369	0.339805	0.431511	0.116998	0.499252	0.571231	0.200874	0.61304	0.20794	0.902134	1.12926	1.38144	1.41605	1.19199	1.14479	1.23442	0.468047	0.667416	0.546727	0.954601	1.04822	1.60512	1.634	1.42802
YBR288C	APM3	transport; intracellular protein transport; Golgi to vacuole transport; protein targeting to vacuole; protein transport; vesicle-mediated transport	molecular_function	membrane; Golgi apparatus; cytoplasmic vesicle; clathrin adaptor complex; AP-3 adaptor complex; cytoplasmic vesicle membrane	-0.101489	0.609082	-0.996803	-1.2335	0.182189	-0.0602999	0.0760813	0.276155	0.214086	0.247593	0.0549958	0.14176	-0.137821	0.0853153	0.0487519	0.371678	-0.350912	0.0149643	-0.104205	-0.423052	-0.146481	0.121984	-0.151264	-0.37969	-0.234738	-0.181403	-0.417967	-0.368863
YBR289W	SNF5	chromatin remodeling; regulation of transcription, DNA-dependent; positive regulation of transcription from RNA polymerase II promoter; sucrose catabolic process; double-strand break repair via homologous recombination; transcription, DNA-dependent; carbon catabolite activation of transcription from RNA polymerase II promoter	RNA polymerase II activating transcription factor binding	nuclear chromosome; nucleus; cytosol; SWI/SNF complex	0.00797671	-0.482101	0.479898	0.178066	-0.127413	0.157871	0.0424767	0.109912	-0.0834436	0.0784833	-0.144665	0.0143549	-0.0526984	-0.0866925	0.0275539	0.150634	-0.31469	0.162472	0.135939	0.445926	-0.0799502	-0.493938	-0.434062	-0.23114	-0.0378746	-0.459992	-0.0374625	-0.252071
YBR290W	BSD2	transport; ubiquitin-dependent protein catabolic process; protein targeting to vacuole; response to stress; metal ion transport	protein binding	membrane; endoplasmic reticulum; fungal-type vacuole membrane; fungal-type vacuole; integral to membrane; vacuole	0.211	-0.305748	0.354622	0.594413	0.102024	-0.0700409	0.149409	0.00105455	0.143157	-0.0162859	0.0783276	0.123461	-0.0725455	0.27269	0.315401	0.257008	0.427984	0.163139	-0.143281	-0.0220356	0.0803245	0.0448847	0.110576	-0.379618	-0.335478	0.0715509	-0.1726	-0.335672
YBR291C	CTP1	transport; transmembrane transport; mitochondrial citrate transport	tricarboxylate secondary active transmembrane transporter activity	membrane; integral to membrane; mitochondrial inner membrane; mitochondrion	0.048403	0.265668	-0.774	-0.925339	-0.197337	-0.12567	-0.341632	0.205841	0.139056	-0.0620554	0.0620871	-0.279072	-0.252146	-0.299252	-0.620508	-0.373129	-0.425347	-0.583731	-0.70834	-1.22816	-0.0632376	-0.46556	-0.565347	-0.969393	-1.27503	-1.18791	-0.936313	-1.07442
YBR292C	YBR292C				-0.103098	-0.537415	0.0380929	1.19241	0.00203027	-2.30136	-0.333589	-1.31633	-1.12847	0.136143	-0.444846	-0.317296	-0.421447	-0.822632	-0.5676	-0.100156	-0.68509	-0.479581	-1.13955	-2.13693	-0.822625	-1.14045	-0.116507	-1.70448	-0.493198	-0.9681	-0.513941	-1.00885
YBR293W	VBA2	basic amino acid transport; transport; transmembrane transport; amino acid transport	basic amino acid transmembrane transporter activity; drug transmembrane transporter activity	vacuolar membrane; membrane; fungal-type vacuole membrane; integral to membrane; vacuole	-0.0828512	-0.0283163	0.676821	0.370378	0.151669	0.500657	0.318101	0.140125	0.205462	0.507513	0.217748	-0.0392691	0.0149735	-0.0791208	-0.0178421	0.246122	0.0104894	-0.426923	0.038304	-0.334019	-0.0120923	-0.0384163	-0.0793339	-0.573541	-0.643076	-0.355016	-0.472884	-0.603694
YBR295W	PCA1	cellular iron ion homeostasis; transport; transmembrane transport; cation transport; metal ion transport; ion transport; response to cadmium ion; cellular metal ion homeostasis; cadmium ion transport	ATPase activity, coupled to transmembrane movement of ions, phosphorylative mechanism; ATP binding; cation-transporting ATPase activity; cadmium-exporting ATPase activity; metal ion binding; hydrolase activity; nucleotide binding; copper ion binding; copper-transporting ATPase activity	membrane; integral to membrane; plasma membrane	0.148268	0.00125854	0.403009	0.542529	0.248678	0.206131	0.643993	0.4713	0.28438	0.270926	0.361023	0.182423	0.548435	0.722501	0.999501	0.920046	0.97737	0.532777	0.535035	0.386388	0.484334	0.450811	0.512527	0.453262	0.0130596	-0.0336092	0.163264	-0.438032
YBR296C	PHO89	transport; phosphate ion transport; transmembrane transport; phosphate ion transmembrane transport	inorganic phosphate transmembrane transporter activity; sodium:inorganic phosphate symporter activity; symporter activity	membrane; integral to membrane; plasma membrane			2.91449	3.31651	0.178379	0.718543	0.547171	0.61945	0.260863	0.0238411	0.462183	0.40742	0.156092	0.000494144	-0.89899	0.560937	0.152111	-0.366381	-0.570471	-0.527814	0.569662	-0.00716819	-0.0471611	0.430975	-0.479069	0.404969	-0.818258	-2.19673
YBR297W	MAL33	regulation of transcription from RNA polymerase II promoter; maltose metabolic process; regulation of transcription, DNA-dependent; transcription, DNA-dependent; cellular carbohydrate metabolic process; transcription from RNA polymerase II promoter	sequence-specific DNA binding RNA polymerase II transcription factor activity; DNA binding; metal ion binding; zinc ion binding; sequence-specific DNA binding transcription factor activity	nucleus	-0.298768	-1.20807	2.20381	3.5034	-0.0232656	-0.303918	0.0182268	0.105587	-0.158663	0.37343	-0.227727	0.302709	-0.125483	-0.534854	-0.914988	-0.406529	-1.02214	-1.11267	-1.22641	-0.898562	0.214661	-0.806238	-0.704296	-1.17642	-0.86094	-1.50265	-0.853497	-1.4102
YBR298C	MAL31	transport; carbohydrate transport; transmembrane transport; alpha-glucoside transport; maltose metabolic process	alpha-glucoside:hydrogen symporter activity; transmembrane transporter activity; transporter activity; substrate-specific transmembrane transporter activity	membrane; integral to membrane	0.0235018	-0.895404	1.08194	0.988438	-0.408461	-1.13543	-0.617694	-0.881326	-0.775778	-0.548418	-0.322204	-0.237295	-0.306574	-0.712462	-0.834709	-0.991539	0.0216834	0.150109	0.0151362	0.00227719	-0.138292	-1.33256	-1.37533	-1.3232	-0.679674	-0.694352	-0.412429	-0.800514
YBR301W	PAU24	response to stress; biological_process	molecular_function	fungal-type cell wall; cell wall; extracellular region	-0.322411	-0.203981	0.241131	1.03892	0.111019	-0.149194	-0.0187279	-0.311116	-0.194385	-0.0719839	0.027525	0.216048	-0.115323	-0.184554	0.25579	-0.0531361	0.320918	0.320647	0.540465	0.433881	-0.0976669	-0.298404	-0.332643	-0.514329	0.0610216	-0.0680835	0.332752	0.0381734
YBR302C	COS2	biological_process	molecular_function	membrane; fungal-type vacuole; integral to membrane	0.0975281	-0.234223	0.927831	1.09624	0.248991	-0.416651	-0.0916078	0.0377375	-0.00683089	0.155741	0.00747987	0.445102	0.144024	0.169809	0.148169	0.469221	0.594748	0.251168	0.496195	0.203669	-0.12888	0.0141819	0.223886	0.426951	0.125195	0.685362	0.667342	0.566136
YCL001W	RER1	ER to Golgi vesicle-mediated transport; retrograde vesicle-mediated transport, Golgi to ER; protein retention in ER lumen	molecular_function	ER to Golgi transport vesicle; membrane; Golgi apparatus; integral to membrane; COPI-coated vesicle; Golgi membrane	0.114936	0.225487	-0.345194	-0.542716	0.194309	-0.260401	0.0309893	0.0736685	-0.17333	-0.000840416	-0.126858	0.0913539	0.289286	0.394293	0.122348	0.267402	0.711895	0.333167	0.259547	0.00711641	0.342077	0.440163	0.475706	0.267108	-0.288465	0.269743	0.21264	-0.013492
YCL002C	YCL002C	biological_process	molecular_function	membrane; integral to membrane	0.201966	0.511875	-0.301823	-0.813785	0.109806	0.218158	0.191971	-0.130002	-0.124633	0.000553916	-0.356745	-0.26867	-0.00982491	0.131278	0.125742	0.322779	0.333565	-0.25623	-0.475136	-0.599738	-0.239074	0.0535692	-0.0143715	-0.491434	-0.465804	-0.441862	-0.0587903	-0.528067
YCL004W	PGS1	phospholipid biosynthetic process; cardiolipin biosynthetic process; metabolic process; phosphatidylglycerol biosynthetic process; lipid metabolic process	ATP binding; nucleotide binding; phosphotransferase activity, for other substituted phosphate groups; CDP-diacylglycerol-glycerol-3-phosphate 3-phosphatidyltransferase activity; catalytic activity; transferase activity	mitochondrion	-0.319868	-0.529902	0.609052	1.35753	-0.230368	0.075023	0.0208848	0.37778	-0.114138	-0.0938351	-0.0738669	-0.0705311	0.233161	0.244665	0.0828255	0.238299	0.400342	-0.247351	0.00788177	0.537599	-0.0825072	0.147671	0.324497	0.235663	-0.0517552	0.0566203	0.313092	0.465319
YCL005W	LDB16	biological_process	molecular_function	membrane; lipid particle; integral to membrane; mitochondrion	-0.0862714	0.108079	0.367406	-0.0881064	0.0137386	-0.0527354	-0.229007	-0.322535	-0.47837	-0.0749994	-0.291653	-0.263006	-0.189744	-0.023356	-0.202494	0.0145311	-0.0881177	-0.198528	0.0922334	0.0528734	-0.492274	0.021658	-0.427042	-0.0345613	-0.256271	-0.00331541	0.0135756	-0.151455
YCL007C	YCL007C				-0.355993	-0.340864	0.0369254	-1.226	0.260046	-0.229309	-0.337415	-0.490995		-0.992576	-1.74317	-1.33377	0.517737	0.347438	-0.437695	-1.67246	0.208493	-0.716182	1.25172	0.469179	-2.0466	-0.744451	-0.46624	-0.595091	-0.531156	-0.530931	-0.0310091	-1.96974
YCL008C	STP22	transport; protein targeting to membrane; protein targeting to vacuole; cellular protein modification process; ubiquitin-dependent protein catabolic process via the multivesicular body sorting pathway; late endosome to vacuole transport; protein transport	ubiquitin binding; acid-amino acid ligase activity	membrane; endosome; late endosome membrane; internal side of plasma membrane; ESCRT I complex; cytoplasm	-0.397373	-1.57088	1.1028	1.5399	0.142491	0.911658	0.579789	-0.465979	-0.431616	0.134159	0.342342	-0.365003	-0.14805	-0.0453666	0.198104	-1.08304	-0.63456	-0.136362	-0.409425	0.713844	0.824433	0.645001	0.199351	0.286232	-0.400032	-0.145106	0.512519	0.0983802
YCL009C	ILV6	valine biosynthetic process; cellular amino acid biosynthetic process; metabolic process; isoleucine biosynthetic process; branched-chain amino acid biosynthetic process	amino acid binding; enzyme regulator activity; acetolactate synthase activity	acetolactate synthase complex; mitochondrial nucleoid; mitochondrion	0.190448	0.354566	-0.422957	-0.584097	-0.0915198	0.439202	0.0626256	-0.0563684	0.315269	0.0359933	0.00961059	0.0259495	0.194077	0.20343	0.0908111	0.202241	0.108799	0.0926092	-0.0654895	0.631368	0.161381	0.0905583	-0.398885	-0.393087	0.00398652	-0.168526	-0.298267	-0.180435
YCL010C	SGF29	regulation of transcription, DNA-dependent; cellular protein complex localization; transcription, DNA-dependent; histone H3-K14 acetylation; histone H3-K18 acetylation; positive regulation of transcription from RNA polymerase II promoter; cellular protein localization; histone H3-K9 acetylation; chromatin modification	methylated histone residue binding; RNA polymerase II transcription factor recruiting transcription factor activity	SAGA complex; nucleus; Ada2/Gcn5/Ada3 transcription activator complex	-0.0688001	-0.680805	0.360972	0.41733	0.286641	0.0832825	-0.0972473	0.116503	-0.0782649	-0.0108105	0.0418655	-0.126299	-0.212728	-0.139618	0.0577254	0.270867	0.534457	0.0898486	0.209836	-0.299871	0.0513456	-0.109975	0.550416	0.300544	-0.0754479	0.637063	0.2717	0.26495
YCL011C	GBP2	poly(A)+ mRNA export from nucleus; telomere maintenance	telomeric DNA binding; RNA binding; DNA binding; nucleotide binding; nucleic acid binding	cytoplasmic stress granule; nucleus; chromosome, telomeric region; cytosol; chromosome	0.0091449	0.508665	-0.663224	-0.813965	0.0122576	0.0122523	0.0469083	-0.170061	0.0183749	0.0519937	-0.0155794	-0.100294	0.0273065	-0.0828847	0.0539074	0.0434715	0.0619556	-0.0159653	-0.0284809	-0.0086631	0.10421	-0.226083	-0.220452	-0.0156649	0.0977378	-0.180391	-0.0661485	-0.284348
YCL014W	BUD3	cytokinesis; regulation of Rho protein signal transduction; cell cycle; axial cellular bud site selection	molecular_function; Rho guanyl-nucleotide exchange factor activity	cellular bud neck contractile ring; cellular bud neck	-0.126366	1.49461	-2.50963	-2.46638	-0.216964	0.337715	0.0405201	-0.138602	0.0526834	-0.433417	-0.284926	-0.115657	0.122472	0.415207	0.12064	0.138773	0.439433	0.0808966	-0.113412	0.503192	0.0662897	0.125003	-0.363053	-0.32918	-0.151661	-0.565489	0.0871978	-0.45949
YCL016C	DCC1	DNA replication; mitotic sister chromatid cohesion; response to DNA damage stimulus; maintenance of DNA trinucleotide repeats	molecular_function	Ctf18 RFC-like complex	-0.282339	-0.529865	0.380422	0.182385	-0.135019	0.225195	0.0327713	0.025462	-0.00585705	0.0425073	-0.305217	0.0172802	0.314649	0.31844	0.0927286	0.190445	0.0147568	-0.197768	0.0551529	0.0445118	0.0424281	0.32881	0.170235	0.24765	0.101854	0.147866	0.21795	0.0594234
YCL017C	NFS1	cellular iron ion homeostasis; tRNA wobble uridine modification; metabolic process; tRNA processing; iron-sulfur cluster assembly; cysteine metabolic process; tRNA thio-modification; mitochondrial tRNA thio-modification	catalytic activity; transferase activity; pyridoxal phosphate binding; cysteine desulfurase activity	nucleus; mitochondrion	0.199529	-0.0430276	-0.0462505	-0.0065838	0.232336	0.315026	0.218872	0.158781	0.620441	0.282504	0.264961	-0.0348215	0.404552	0.304588	0.4251	0.361443	0.421104	0.356021	0.246608	0.468636	0.259795	0.147457	-0.231561	0.0738435	0.160297	-0.469025	-0.334166	-0.313267
YCL021W-A	YCL021W-A	biological_process	molecular_function	cellular_component; membrane; integral to membrane	-0.531231	-0.178489	-0.291215	-0.0515939	-0.0595578	0.175122	0.260516	0.304727	0.426803	0.264379	0.55635	0.185223	0.085742	0.0241453	-0.160255	-0.196915	-0.167909	0.264888	0.160912	-0.101473	-0.159246	-0.107594	-0.022009	0.0457643	0.111891	-0.303077	-0.446766	-0.408962
YCL024W	KCC4	phosphorylation; cell division; protein phosphorylation; cytokinesis checkpoint; cell cycle; regulation of cell shape; septin ring assembly; budding cell bud growth	ATP binding; kinase activity; phosphatidic acid binding; phosphatidylinositol-4,5-bisphosphate binding; protein serine/threonine kinase activity; protein kinase activity; nucleotide binding; transferase activity; phosphatidylserine binding; transferase activity, transferring phosphorus-containing groups	cellular bud neck septin collar; incipient cellular bud site; septin ring; cellular bud neck; plasma membrane	-0.0839037	1.85506	-2.52204	-1.77337	0.0718033	-0.582316	0.055114	-0.49979	-0.215419	0.162686	0.196564	0.478552	0.0403728	-0.725813	-0.329816	-0.636021	-0.199173	0.000224439	0.199863	-0.0129968	-0.272957	-0.94393	-0.73049	-0.202966	-0.350472	-0.615018	-0.694846	-0.321234
YCL025C	AGP1	transport; transmembrane transport; amino acid transport; amino acid transmembrane transport	L-proline transmembrane transporter activity; amino acid transmembrane transporter activity	membrane; integral to membrane; plasma membrane	0.145303	-0.434742	0.733455	1.69824	-0.0991935	-1.04939	1.27726	0.905686	0.397441	-0.0418365	-0.169872	-0.382438	0.00632206	1.11113	0.731803	0.101302	0.244213	-0.295624	-0.51006	-0.146068	0.0443739	-0.531305	0.807431	-0.341475	-1.14243	-1.0378	-1.18345	-0.693985
YCL026C-A	FRM2	fatty acid metabolic process; cellular response to oxidative stress; negative regulation of fatty acid metabolic process; oxidation-reduction process; lipid metabolic process	oxidoreductase activity, acting on NAD(P)H, nitrogenous group as acceptor; oxidoreductase activity	nucleus; cytoplasm	-0.835683	-1.13578	2.04199	0.13075	0.147625	-0.220041	0.440276	0.560276	0.996978	1.20384	0.854152		0.718199	1.02201	-0.49991	1.22255	0.133215	-0.557177	-0.286511	-1.5876	0.162889	-0.2442	0.476707		-1.04349	-0.177615		-1.34441
YCL026C-B	HBN1	biological_process; oxidation-reduction process	NAD(P)H nitroreductase activity; oxidoreductase activity	nucleus; cytoplasm	-0.219923	-1.12516	1.44535	2.07686	-0.365924	-0.293149	-0.35769	-0.188005	-0.435067	-0.165489	-0.356645	0.0917059	-0.265657	-0.473207	-0.408625	-0.798238	-1.01832	-0.461776	-0.342613	-0.964874	-0.512101	-0.579738	-0.634524	-0.342377	-0.627521	-0.945784	-1.49324	-1.79282
YCL027W	FUS1	cortical protein anchoring; regulation of termination of mating projection growth; cytogamy	molecular_function	membrane; integral to plasma membrane; integral to membrane; mating projection tip	-0.1819	0.136226	-0.645041	-0.586741	-0.374244	-0.177988	-0.148229	0.119371	0.0942105	0.0422853	0.0875297	0.0616499	-0.219715	-0.447059	-0.607299	-0.460248	-0.304672	-0.277968	-0.458679	-0.578457	0.087718	-0.629612	-0.771381	-1.31308	-1.06388	-0.788187	-0.666452	-0.443993
YCL028W	RNQ1	biological_process	molecular_function	nucleus; cytosol; cytoplasm	0.160831	0.122578	-0.636762	-0.208395	0.254147	-0.180709	-0.0112574	-0.144686	0.249652	0.352064	0.137648	0.132865	-0.0781902	0.145907	0.0315383	0.0747447	-0.11677	0.117487	0.0312196	-0.0143716	-0.00337914	-0.329396	-0.540356	0.0130091	0.155518	0.373011	-0.210236	-0.0570379
YCL029C	BIK1	cell division; mitotic spindle elongation; karyogamy involved in conjugation with cellular fusion; cell cycle; nuclear migration involved in conjugation with cellular fusion; negative regulation of microtubule polymerization; mitosis	protein homodimerization activity; microtubule binding	cytoskeleton; microtubule; cell cortex; microtubule plus end; spindle pole body; mating projection tip; cytoplasm; condensed nuclear chromosome kinetochore; spindle; kinetochore; spindle microtubule	0.315621	0.607086	-0.918663	-0.661353	-0.616039	0.320244	0.209325	-0.0241709	0.0584345	-0.496285	-0.0092456	-0.306028	0.0940548	0.220188	-0.0922712	-0.131884	-0.482641	0.239486	-0.641658	-0.331104	-0.120461	0.0477191	-0.0238925	-0.308239	-0.221039	0.174494	-0.6147	-0.503291
YCL030C	HIS4	cellular amino acid biosynthetic process; metabolic process; histidine biosynthetic process; oxidation-reduction process	ATP binding; NAD binding; catalytic activity; phosphoribosyl-AMP cyclohydrolase activity; phosphoribosyl-ATP diphosphatase activity; metal ion binding; hydrolase activity; nucleotide binding; zinc ion binding; histidinol dehydrogenase activity; oxidoreductase activity	cytoplasm	0.0723023	-0.163332	-0.115813	-0.573194	0.131968	0.124112	0.549096	0.56347	0.585103	0.367041	0.63029	0.562675	0.308969	0.113054	-0.118332	-0.205951	0.0522612	0.435067	0.362915	0.805899	0.582834	0.146569	0.0019847	0.270859	0.271936	0.484392	0.152759	0.825619
YCL031C	RRP7	ribosome biogenesis; ribosomal small subunit assembly; rRNA processing	molecular_function	nucleus; nucleolus; CURI complex; UTP-C complex	0.267088	0.208191	-0.520316	-0.588223	-0.142323	0.441688	-0.0341358	-0.115436	0.0594943	-0.10807	-0.121437	-0.388815	0.161688	0.00406608	-0.124055	-0.220665	-0.313552	-0.708496	-0.894868	-0.490822	-0.0258842	0.134946	-0.345595	-0.265903	-0.342561	-0.349283	-0.467654	-0.576108
YCL032W	STE50	signal transduction; signal transduction involved in filamentous growth; osmosensory signaling pathway via Sho1 osmosensor; cellular response to heat; cell cycle arrest; MAPK cascade involved in osmosensory signaling pathway; response to pheromone; pheromone-dependent signal transduction involved in conjugation with cellular fusion; cell cycle	protein kinase regulator activity; SAM domain binding	cytoplasm	-0.25447	-0.290922	0.708491	0.589083	-0.324466	-0.0780978	-0.298049	0.0119293	0.400752	0.158203	0.0592285	0.261948	0.102237	-0.0815768	0.280871	0.177709	0.0510969	0.203545	-0.126886	0.450678	-0.165804	-0.166423	-0.0455405	-0.0482028	0.228166	0.269393	0.232066	0.459157
YCL033C	MXR2	electron transport chain; cellular response to oxidative stress; oxidation-reduction process	metal ion binding; peptide-methionine (R)-S-oxide reductase activity; oxidoreductase activity	mitochondrion	0.0890503	-0.50548	1.29467	1.28634	0.0159632	-0.520089	-0.331991	-0.286328	-0.328757	-0.0575557	-0.165312	0.218597	-0.136709	-0.00733315	-0.135809	0.162031	0.43175	0.120421	0.18954	0.308648	-0.141579	-0.0795504	0.263231	0.261193	0.354044	1.04951	1.33939	1.15127
YCL034W	LSB5	intracellular protein transport; actin filament organization; actin cytoskeleton organization; endocytosis; actin cortical patch localization	molecular_function	cytoskeleton; actin cortical patch; cell cortex; intracellular; cytoplasm	0.229798	-0.199799	0.538026	0.585388	0.0597719	-0.207741	0.0107105	0.15819	0.0365773	0.131753	-0.106614	0.249346	-0.306793	0.163827	0.0799383	0.183241	-0.132329	0.0274114	-0.103272	0.12594	-0.214718	-0.224913	-0.193937	0.317481	0.270331	0.509551	0.297003	0.174775
YCL035C	GRX1	electron transport chain; cellular response to oxidative stress; protein glutathionylation; cell redox homeostasis	disulfide oxidoreductase activity; electron carrier activity; protein disulfide oxidoreductase activity; glutathione transferase activity; glutathione peroxidase activity	nucleus; cytoplasm	0.179817	-1.06679	1.31823	1.81743	-0.233817	-0.541308	-0.303456	-0.247783	0.0791369	0.204447	0.117305	0.388836	-0.420326	-0.284712	-0.110187	-0.232991	0.733141	1.19948	1.22876	1.86024	-0.241202	-0.18611	0.033779	1.42349	2.47604	2.87707	3.04489	3.65986
YCL036W	GFD2	biological_process	molecular_function; nucleic acid binding	cellular_component	-0.0785474	1.00564	-1.89822	-1.94685	-0.0471807	1.20874	-1.36765	-1.43824	-0.905947	-0.996282	-0.885902	-1.76588	-0.0976293	-0.781355	-0.756482	-0.573275	-0.733789	-1.47357	-1.66507	-1.63158	0.270252	0.666874	-0.277498	-0.201747	-0.452297	-0.516368	-0.721925	-0.648477
YCL037C	SRO9	cytoplasmic translation	RNA binding	cytoplasm; polysome	0.13169	2.07441	-2.15108	-2.74391	0.376335	1.15133	-0.047332	-0.294194	0.0246708	-0.0968416	0.000454685	-0.845013	0.592245	0.0472936	0.0762425	-0.290594	-0.31276	-0.35059	-0.497547	-0.221878	0.63055	0.754797	0.179863	0.356303	0.237803	-0.163918	-0.566301	-0.492696
YCL038C	ATG22	transport; amino acid transport; amino acid transmembrane export from vacuole; autophagy	molecular_function	membrane; vacuolar membrane; integral to fungal-type vacuolar membrane; integral to membrane; vacuole	-0.0710059	-0.206257	0.412925	0.449574	-0.00529511	-0.384017	-0.201091	0.129448	0.228196	0.267965	-0.0694031	0.456904	-0.308446	-0.285907	0.408424	1.05352	0.701612	0.326759	0.577391	0.610155	0.0800579	0.0966943	0.218862	0.278341	0.048782	0.465276	0.545355	0.616079
YCL039W	GID7	proteasomal ubiquitin-dependent protein catabolic process; negative regulation of gluconeogenesis	molecular_function	nucleus; GID complex; cytoplasm	0.398334	-0.0542099	1.02249	1.6684	-0.0662686	-0.0541485	0.196413	0.418023	0.441863	0.0518863	0.157569	0.23123	0.265822	-0.214486	-0.0429299	0.120335	0.187525	0.072015	0.11215	0.974537	0.142864	-0.0787927	0.0704271	-0.0759562	0.380041	0.711426	0.405991	0.781589
YCL040W	GLK1	glucose metabolic process; mannose metabolic process; phosphorylation; glucose 6-phosphate metabolic process; glucose import; carbohydrate metabolic process; glycolysis	ATP binding; kinase activity; nucleotide binding; glucokinase activity; phosphotransferase activity, alcohol group as acceptor; hexokinase activity; transferase activity	cytosol; plasma membrane	0.515394	-0.907489	2.05259	2.42647	0.153202	-0.480395	-0.216206	0.250381	0.474541	0.639806	0.552542	1.81226	0.160542	0.616461	1.84863	2.24114	2.74064	3.63094	3.96441	4.89949	0.660644	0.411253	1.39006	2.55377	2.94233	3.39538	2.98007	3.21052
YCL041C	YCL041C				-0.235102	0.258537	0.606796	0.334716	0.460238	-0.025699	0.468028	0.121846	0.198486	0.0994934	-0.00866789	-0.639645	0.399555	0.298268	2.33587	0.195574	0.720829	-0.345694		0.361038		1.8065	0.80824	0.541423	0.891023	1.69977	1.23379	-0.276129
YCL043C	PDI1	protein folding; glycerol ether metabolic process; cell redox homeostasis	protein disulfide oxidoreductase activity; electron carrier activity; isomerase activity; protein disulfide isomerase activity	endoplasmic reticulum lumen; endoplasmic reticulum	0.321114	-0.0188801	0.352627	0.622726	0.187773	0.310966	0.252575	0.247394	0.499267	0.262443	0.411775	0.575009	0.318031	0.390669	0.361658	0.627055	0.726518	0.504322	0.642284	1.21418	0.483783	0.44548	0.47422	0.822245	0.907718	1.13179	0.970229	1.14943
YCL044C	MGR1	misfolded or incompletely synthesized protein catabolic process	misfolded protein binding	membrane; i-AAA complex; mitochondrial inner membrane; integral to membrane; mitochondrion	0.0942192	0.0657663	-0.0998802	0.534333	-0.844122	0.0897309	-0.431502	-0.286831	-0.060583	-0.529168	-0.293639	-0.567662	-0.261353	-0.125256	-0.268751	-0.37044	-0.156016	-0.698434	-0.367088	0.557729	-0.0285135	-0.154593	-0.595246	0.0821057	0.0886675	2.47403	-0.341094	-0.168269
YCL045C	EMC1	protein folding in endoplasmic reticulum	molecular_function	membrane; ER membrane protein complex; endoplasmic reticulum; integral to membrane; endoplasmic reticulum membrane	-0.275277	0.600453	-0.805459	-0.784783	-0.266931	0.121616	-0.120038	-0.158607	-0.605961	-0.359433	-0.246086	-0.28466	0.0207281	-0.10999	0.148787	0.475054	0.263132	0.0120163	0.0993454	0.555131	0.252078	0.232648	0.242386	0.089194	0.217468	0.221419	0.155606	0.370141
YCL047C	POF1	pseudohyphal growth; invasive growth in response to glucose limitation; ER-associated protein catabolic process	ATPase activity	cellular_component	-0.019315	-0.313188	0.931371	0.522491	0.018455	0.125415	-0.102867	-0.13522	-0.308528	-0.00791831	-0.139927	0.16589	-0.0800564	-0.0694023	-0.000163824	0.171149	0.0910519	0.283161	-0.14533	-0.301995	-0.440151	0.206523	0.347362	0.058799	-0.177054	-0.05871	0.0526499	-0.154314
YCL049C	YCL049C	biological_process	molecular_function	membrane	0.0397355	0.671246	-0.32945	-0.150865	-0.123734	0.147969	-0.0300652	0.0764858	0.212047	0.492615	0.287458	0.558343	0.0863606	0.165269	0.454564	0.919879	0.80036	0.619022	0.640586	0.906297	-0.158924	0.118404	0.0631132	0.18269	0.0364617	0.402249	0.626654	0.475127
YCL050C	APA1	nucleotide biosynthetic process; nucleoside catabolic process; nucleotide metabolic process	ATP binding; hydrolase activity; nucleotide binding; ATP adenylyltransferase activity; sulfate adenylyltransferase (ADP) activity; nucleotidyltransferase activity; catalytic activity; transferase activity; bis(5'-nucleosyl)-tetraphosphatase activity	nucleus; cytoplasm	-0.00152922	0.4282	-1.01245	-1.313	0.0695006	-0.00525621	0.135334	0.136549	0.368751	0.0512711	0.134653	0.19879	-0.0398089	-0.0225893	-0.0473256	-0.05768	-0.153728	0.132833	-0.105906	0.062343	-0.260822	-0.0874667	-0.334104	-0.066704	-0.185203	-0.0286618	-0.300266	0.102172
YCL051W	LRE1	negative regulation of protein kinase activity; fungal-type cell wall organization	molecular_function; protein kinase inhibitor activity	cellular_component	-0.0861872	-0.393533	1.01388	1.05544	-0.0968029	-0.327196	0.2594	0.413877	0.29468	0.128028	0.037667	-0.00675044	-0.16984	0.217288	0.0730877	-0.248399	-0.184659	0.258226	0.196429	0.3892	-0.0590272	-0.190375	0.350531	0.448299	0.552021	0.708759	0.72188	0.523033
YCL052C	PBN1	GPI anchor biosynthetic process; protein processing; ER-associated protein catabolic process	mannosyltransferase activity	membrane; endoplasmic reticulum; integral to membrane; endoplasmic reticulum membrane	-0.0113805	-0.528327	0.649184	0.794638	0.337482	0.0817845	0.214158	0.210888	0.78243	0.415823	0.461606	0.590408	0.133103	0.201566	0.299186	0.322249	0.315966	0.542494	0.655402	0.542396	0.0884949	-0.0513321	0.0421051	0.407751	0.525461	0.477543	0.599765	0.673359
YCL054W	SPB1	rRNA methylation; ribosome biogenesis; RNA methylation; maturation of 5.8S rRNA from tricistronic rRNA transcript (SSU-rRNA, 5.8S rRNA, LSU-rRNA); maturation of LSU-rRNA from tricistronic rRNA transcript (SSU-rRNA, 5.8S rRNA, LSU-rRNA); rRNA processing; methylation	rRNA (uridine-2'-O-)-methyltransferase activity; methyltransferase activity; rRNA (guanine) methyltransferase activity; transferase activity	nucleus; nucleolus; preribosome, large subunit precursor	0.344394	1.92465	-2.86866	-3.65665	0.523544	0.678825	0.303369	-0.39712	-0.18985	-0.121802	-0.208105	-0.81501	0.123151	0.325397	-0.178041	-0.470601	-0.541976	-0.731259	-1.1422	-1.68887	0.120344	0.0803521	-0.375792	-0.521425	-0.518534	-0.941979	-1.21276	-1.32285
YCL055W	KAR4	G1 phase of mitotic cell cycle; karyogamy; nucleobase-containing compound metabolic process; meiosis; karyogamy involved in conjugation with cellular fusion; positive regulation of transcription from RNA polymerase II promoter by pheromones; negative regulation of transcription from RNA polymerase II promoter by pheromones; methylation	methyltransferase activity; sequence-specific DNA binding transcription factor activity	nucleus; cytoplasm	-0.0423507	-0.470292	0.101596	-0.54871	0.175674	-0.0478869	0.11128	0.293719	0.02498	-0.00958883	0.135904	0.230938	-0.336186	-0.219302	-0.470335	-0.393338	-0.208063	-0.443796	-0.240615	-0.740752	0.154869	0.195102	0.0282635	-0.125465	-0.315416	0.657088	0.220093	0.0285237
YCL056C	PEX34	peroxisome organization	molecular_function	integral to peroxisomal membrane; membrane; integral to membrane; peroxisome; cytoplasm; peroxisomal membrane	-0.00834646	0.624551	-0.483426	-0.674076	0.193299	-0.131842	-0.16142	-0.284298	-0.266784	0.114875	-0.0532093	-0.0132127	-0.268301	-0.186484	0.148521	0.0370823	-0.208123	0.204114	-0.114797	-0.709581	-0.553632	-0.404296	-0.131763	-0.384586	-0.0688167	0.000710633	-0.109024	-0.495902
YCL057C-A	MOS1	cristae formation	molecular_function	membrane; integral to membrane; mitochondrial inner membrane; mitochondrial crista junction; mitochondrion; integral to mitochondrial inner membrane	0.0852753	-0.630097	1.26262	1.36371	0.259792	-0.214412	-0.397767	-0.234347	-0.184954	-0.0646871	-0.0811069	0.0803909	-0.408206	0.104245	0.0368922	-0.480261	0.214101	0.197519	0.334107	0.325191	-0.0843952	-0.00691358	0.287698	0.192255	0.316127	0.499243	0.320531	0.259677
YCL057W	PRD1	proteolysis	metal ion binding; metalloendopeptidase activity; hydrolase activity; metallopeptidase activity; peptidase activity	mitochondrial intermembrane space; mitochondrion; cytoplasm	-0.192328	0.00920939	-0.239593	-0.159437	-0.136194	-0.348562	-0.255684	-0.0136585	0.140643	0.0892754	0.251047	0.305886	-0.0812777	-0.131868	0.0458934	-0.0768313	-0.0132038	0.0455493	0.145852	0.329175	-0.14942	-0.12927	-0.134408	0.0742155	0.184578	-0.332388	0.0629351	0.249209
YCL059C	KRR1	ribosome biogenesis; ribosomal small subunit biogenesis; endonucleolytic cleavage in ITS1 to separate SSU-rRNA from 5.8S rRNA and LSU-rRNA from tricistronic rRNA transcript (SSU-rRNA, 5.8S rRNA, LSU-rRNA); rRNA processing	molecular_function; RNA binding	nucleus; 90S preribosome; small-subunit processome; nucleolus; ribonucleoprotein complex	-0.0497101	0.56886	-1.05764	-1.64644	0.288097	0.25674	0.409253	0.181343	-0.320594	-0.138753	-0.243974	-0.965278	0.124023	0.185176	-0.0830123	-0.0162756	-0.204399	-0.510219	-0.595464	-1.15285	0.041104	0.106057	-0.212501	-0.0375159	-0.23118	-0.968311	-0.850701	-1.26382
YCL061C	MRC1	chromatin silencing at silent mating-type cassette; DNA repair; DNA replication; chromatin silencing at telomere; replication fork protection; DNA replication checkpoint; intra-S DNA damage checkpoint; maintenance of DNA repeat elements; mitotic sister chromatid cohesion; telomere maintenance	molecular_function	nuclear chromosome; nucleus; replication fork protection complex; nuclear replication fork	-0.12349	0.965888	-1.20106	-0.496473	0.136013	-0.222389	-0.229167	-0.227319	0.0130732	-0.110652	0.000817832	0.246473	0.036803	-0.142414	-0.456651	-0.565563	-0.278628	-0.145218	-0.017306	0.154362	0.0704858	-0.144394	-0.186193	-0.0350007	0.073231	-0.174902	-0.144607	-0.269679
YCL063W	VAC17	vacuole inheritance	protein anchor	membrane; vacuolar membrane; fungal-type vacuole membrane; vacuole	0.33803	0.987258	-1.26664	-1.15752	0.190719	0.735337	0.335277	0.397337	0.21829	0.387214	-0.0179842	0.00743697	0.280118	0.283052	0.245889	0.461659	0.326286	0.186793	0.0133573	0.252695	0.647298	0.55537	0.215588	-0.10195	-0.320614	-0.55507	-0.432032	-0.605727
YCL064C	CHA1	L-serine catabolic process; cellular amino acid metabolic process; threonine catabolic process	L-serine ammonia-lyase activity; lyase activity; pyridoxal phosphate binding; L-threonine ammonia-lyase activity	mitochondrial nucleoid; mitochondrion	0.0251134	-0.411196	0.916374	1.18839	-0.19273	-0.256873	-0.876541	-0.850075	-0.672255	-0.0147772	0.129485	-0.0488944	-0.0681456	-0.660864	-0.628471	-0.468418	-0.576927	-0.394134	-0.685516	-0.272335	-0.479211	-0.381876	-0.625296	-0.583086	-0.167968	-1.33968	-0.909531	-0.604973
YCL066W	HMLALPHA1	positive regulation of mating-type specific transcription, DNA-dependent; regulation of transcription from RNA polymerase II promoter; regulation of transcription, DNA-dependent; transcription, DNA-dependent; regulation of mating-type specific transcription, DNA-dependent	mating pheromone activity; DNA binding; transcription coactivator activity; sequence-specific DNA binding; DNA binding, bending	nucleus	0.195487	-0.106808	0.785504	0.900089	0.356526	0.344063	-0.161058	-0.95663	-0.438672	-1.3415	-1.01505	-0.287246	-0.176012	-0.0864369	0.0662585	0.280134	0.170758	-0.350445	-0.0940798	-0.658804	0.0987131	0.285995	0.445708	0.255605	0.0679212	0.273613	0.556978	0.627421
YCL067C	HMLALPHA2	regulation of transcription, DNA-dependent; negative regulation of mating-type specific transcription from RNA polymerase II promoter; transcription, DNA-dependent	DNA binding; sequence-specific DNA binding; sequence-specific DNA binding transcription factor activity; DNA binding, bending; RNA polymerase II transcription regulatory region sequence-specific DNA binding transcription factor activity involved in negative regulation of transcription	nucleus	-0.113522	-0.0816365	0.427208	0.615954	-0.205906	-0.351795	-0.331087	0.083826	-0.437712	-0.276849	-0.443433	-0.370609	-0.334639	0.131745	-0.141741	-0.060565	0.0475429	-0.0159448	0.0998556	-0.425529	-0.144539	-0.191668	0.0500504	-0.234131	-0.28048	0.103387	0.394678	0.0972949
YCL068C	YCL068C	small GTPase mediated signal transduction; biological_process	molecular_function; guanyl-nucleotide exchange factor activity	cellular_component; intracellular	0.291345	0.0337415	0.859081	1.29553	0.924543	-0.246439	-0.0409695	-0.0734503	-0.239347	-1.09802	-0.433259	-0.427737	0.517408	0.63031	0.044174	0.0705663	0.581214	1.29477	0.545582	-0.1718	0.985418	0.629725	0.962308	0.758382	0.630692	0.511688	0.69206	0.672921
YCL073C	GEX1	transport; transmembrane transport; glutathione transmembrane transport; ion transport	solute:hydrogen antiporter activity; antiporter activity	vacuolar membrane; membrane; integral to membrane; plasma membrane; vacuole	0.250529	-0.318214	-0.294935	2.25535	0.869248	-0.102763	-0.607039	-0.691011	-0.265406	0.463586	0.0970505	0.290129	0.0970941	0.20079	-0.0317168	0.469946	0.1961	0.437529	0.684723	-0.244408	-0.416973	-0.0113175	0.879293	0.859534	-0.15197	0.952407	0.934325	0.950204
YCR002C	CDC10	exit from mitosis; cell division; cytokinesis; sporulation; septin ring assembly; cell cycle; maintenance of cell polarity	protein complex scaffold; 1-phosphatidylinositol binding; nucleotide binding; structural molecule activity; GTP binding; GTPase activity	membrane; meiotic spindle; septin filament array; mating projection tip; mating projection base; cellular bud neck; cellular bud neck septin ring; septin complex; ascospore-type prospore; prospore membrane; spindle microtubule	-0.153108	-0.00542476	-0.250459	-0.498959	0.190847	-0.477355	0.107028	0.184371	0.213144	0.326671	0.219983	0.203993	-0.0892861	0.0371627	-0.0644332	-0.139775	-0.0582239	0.0311422	0.0170302	-0.502181	0.165575	-0.292001	-0.176079	0.164275	0.0584952	-0.140313	-0.340889	-0.298182
YCR003W	MRPL32	mitochondrial translation; translation	structural constituent of ribosome	ribosome; mitochondrial large ribosomal subunit; large ribosomal subunit; ribonucleoprotein complex; mitochondrial inner membrane; mitochondrion	0.254043	-0.999049	1.45619	1.31697	0.00690086	-0.0214414	0.00692067	0.0649671	-0.445188	-0.0828123	-0.436336	0.086021	0.120374	0.24454	0.197238	-0.0632275	0.120261	-0.360603	-0.256796	-0.39537	0.137053	0.601837	1.08287	-0.0451797	-0.372162	0.840474	0.873108	0.494106
YCR004C	YCP4	negative regulation of transcription, DNA-dependent; biological_process; oxidation-reduction process	electron carrier activity; FMN binding; oxidoreductase activity	membrane; membrane raft; mitochondrion; plasma membrane; cytoplasm	-0.0202185	-0.684112	1.29721	1.93027	0.267307	-0.161347	0.139165	0.254413	0.742016	0.692368	0.638232	0.825251	-0.00286591	0.186961	0.0236054	-0.0649681	0.376697	0.426578	0.608538	0.75631	0.235043	-0.126076	-0.354002	0.369893	0.681774	0.784416	0.886134	1.27055
YCR005C	CIT2	tricarboxylic acid cycle; citrate metabolic process; glyoxylate cycle; glutamate biosynthetic process; cellular carbohydrate metabolic process	transferase activity, transferring acyl groups, acyl groups converted into alkyl on transfer; transferase activity; citrate (Si)-synthase activity	peroxisome; mitochondrion	0.0368127	-1.12648	2.23049	2.80077	0.0120867	0.899767	0.395874	0.492798	0.578599	0.381021	0.433435	0.538076	-0.0242379	0.225314	0.797872	0.50596	0.619848	0.104527	0.185945	0.410012	0.100979	1.11432	0.819079	0.499326	0.0456104	0.189932	0.129108	0.231349
YCR006C	YCR006C				0.284497	-0.69927	1.86252	2.48376		0.725581		-0.0881175	0.295701	0.492644	-0.433921	0.0732747	1.00636	-0.283406	-0.195044	-0.0341804	1.68504	0.807965	0.689678	0.0886526	1.41965	0.708787	1.00575		-0.282402	0.428307	1.04957	-0.286529
YCR007C	YCR007C	biological_process	molecular_function	membrane; cellular_component; integral to membrane	-0.351308	-0.815541	1.37087	1.59016	-0.22853	0.0819814	0.242453	0.0757908	0.0739375	0.14293	-0.0161821	0.26566	-0.161714	-0.3433	0.1111	-0.104795	0.407727	-0.127752	0.110684	-0.0665086	-0.179784	-0.0707817	0.497928	0.22379	-0.0726458	0.23869	0.368164	0.0971349
YCR008W	SAT4	phosphorylation; G1/S transition of mitotic cell cycle; protein phosphorylation; cellular protein localization; protein dephosphorylation; cellular cation homeostasis	ATP binding; protein serine/threonine kinase activity; protein kinase activity; nucleotide binding; kinase activity; transferase activity; transferase activity, transferring phosphorus-containing groups	cellular_component	-0.0115564	-0.194426	0.223316	0.134025	-0.1461	0.138412	-0.036682	-0.221232	0.130069	-0.000797966	-0.151022	-0.0114107	0.200196	0.175806	-0.0383994	-0.150802	0.200551	0.0771436	-0.0480568	0.154498	0.172109	0.234297	-0.000636917	-0.0096844	-0.0258215	-0.062597	-0.0533383	0.403242
YCR009C	RVS161	conjugation with cellular fusion; actin cytoskeleton reorganization; response to starvation; actin cytoskeleton organization; response to osmotic stress; endocytosis; lipid tube assembly; actin cortical patch localization	lipid binding; cytoskeletal protein binding	cytoskeleton; actin cortical patch; membrane raft; mating projection tip; cytoplasm; mating projection	0.0740251	-0.531873	0.642044	0.641213	0.172228	-0.311191	-0.0502274	0.0322741	-0.141261	-0.115085	-0.19946	-0.120435	-0.203867	0.0397248	0.101149	0.192575	0.070241	0.0464855	0.0421365	0.092328	0.162062	0.0693044	0.085792	0.551875	0.337299	0.61377	0.393495	0.676333
YCR010C	ADY2	transport; transmembrane transport; meiosis; nitrogen utilization; ammonium transport; acetate transport; ion transport	ammonium transmembrane transporter activity; acetate transmembrane transporter activity	membrane; vacuolar membrane; integral to membrane; mitochondrion; plasma membrane; vacuole	0.189555	-4.51119	7.02594	7.85818		0.293897	-0.309147	-0.386954	-0.308857	1.64061	0.301297	0.997139		0.263183	1.33866	0.705443		-0.2072	0.743863	0.722882			0.317645	0.681773	0.598921	0.622248	1.93537	0.267497
YCR011C	ADP1	transport; transmembrane transport; ATP catabolic process	ATP binding; nucleotide binding; nucleoside-triphosphatase activity; ATPase activity, coupled to transmembrane movement of substances; ATPase activity	membrane; endoplasmic reticulum; fungal-type vacuole membrane; integral to membrane; endoplasmic reticulum membrane; cytoplasm	0.0406039	0.453195	-0.356018	-0.523737	0.197997	-0.337211	-0.165297	0.0861642	0.362278	0.323207	0.087451	0.482431	-0.071194	0.295253	0.681258	0.767635	0.894082	0.632393	0.81371	0.888417	0.122348	0.152193	0.242949	0.626584	0.645537	1.24712	1.39074	1.10634
YCR012W	PGK1	phosphorylation; gluconeogenesis; glycolysis	ATP binding; kinase activity; nucleotide binding; transferase activity; phosphoglycerate kinase activity	mitochondrion; plasma membrane; cytoplasm	0.573498	-0.731872	1.24881	0.855315	0.723763	0.531666	0.51256	0.627781	0.784703	0.675406	0.756188	0.788694	0.69628	0.712489	0.477726	0.545933	0.516719	0.311062		0.833557	0.88648	0.560154		0.777058	0.901223	0.962964		0.629891
YCR013C	YCR013C				0.251642	0.621507	0.0839538	0.033785	0.951213	0.23085	0.239759	-0.405157	-0.382766	0.215433	0.510964	-0.0922981	-0.503532	0.205748	0.272094	-0.417906	0.156518	0.623145	-0.92453	-0.366763	-0.158189	-1.09351	-0.33052	0.134828	0.1085	-0.0750406	0.394398	-0.0270184
YCR014C	POL4	double-strand break repair; DNA repair; double-strand break repair via nonhomologous end joining; response to DNA damage stimulus	DNA binding; metal ion binding; DNA-directed DNA polymerase activity; nucleotidyltransferase activity; catalytic activity; transferase activity	nucleus	-0.280242	0.0910494	0.0768048	0.171437	-0.0628422	-0.268566	-0.354104	-0.394785	-0.536531	-0.0363512	-0.170759	-0.530909	-0.203416	-0.577437	-0.125727	-0.0117353	0.116833	-0.286614	-0.250903	-0.177204	-0.415253	-0.587696	-0.665376	-0.735021	-0.536726	0.0255342	-0.182789	-0.503043
YCR015C	YCR015C	biological_process	molecular_function	cellular_component	0.430715	-0.560676	1.77667	1.99331	0.179588	0.172473	0.113864	0.216558	0.35385	0.0506547	-0.177863	0.00297198	-0.196935	0.388373	0.352916	0.273469	0.407822	-0.149669	0.162048	-0.454717	-0.0201148	0.36926	0.941968	0.0924844	-0.236386	0.412172	0.734468	-0.193681
YCR016W	YCR016W	biological_process	molecular_function	nucleus; nucleolus	-0.208675	0.419006	-1.36752	-1.71209	0.0840127	0.322703	0.282964	-0.200942	-0.43745	-0.332853	-0.339151	-1.02714	-0.298492	-0.0175083	-0.4781	-0.678526	-0.582741	-0.959936	-1.17819	-1.86287	-0.0347636	-0.0869882	-0.371274	-0.625628	-0.658699	-1.04791	-1.11414	-1.18045
YCR017C	CWH43	GPI anchor biosynthetic process; fungal-type cell wall organization	molecular_function	membrane; endoplasmic reticulum; cellular bud tip; cellular bud neck; integral to plasma membrane; integral to membrane; endoplasmic reticulum membrane; plasma membrane	0.0259646	0.509598	-0.680018	-0.273468	0.0352787	0.0368345	-0.128402	-0.0203155	-0.00165852	-0.0410014	-0.140377	0.0280246	-0.000644429	0.155164	-0.0575559	0.246362	0.339608	0.071515	0.196244	0.258395	-0.207513	0.0739001	-0.132662	-0.282327	-0.0493816	-0.0342537	-0.0884012	-0.0311425
YCR018C	SRD1	regulation of transcription, DNA-dependent; rRNA processing	DNA binding; metal ion binding; zinc ion binding; sequence-specific DNA binding; sequence-specific DNA binding transcription factor activity	nucleus; cytoplasm	-0.285627	0.198926	0.112629	-0.977591	-0.37913	0.102455	-0.294862	0.115757	-0.74261	0.163379	0.0738921	0.0794132	0.090131	0.906141	-0.261067	0.0348214	0.0165539	0.014346	-0.366612	-1.47233	-0.34375	0.151011	0.257726	0.21985	-0.491401	5.40746	-1.04387	-0.289115
YCR018C-A	YCR018C-A				0.344158	1.51439	0.19928	0.70409	0.317535	0.510848	-0.364871	0.0963725	-0.462467		-0.321401	-0.527768	0.332344	0.194195	0.569867	0.0528439	0.843087	1.04106	0.0251984	-0.429215	-0.442412	1.11471	0.990938	0.598884	0.0962426	0.117292	1.83886	0.374002
YCR019W	MAK32	interspecies interaction between organisms	molecular_function	cellular_component	-0.140779	-0.651261	0.579324	0.738739	-0.127989	-0.348375	0.0048793	0.0620112	0.019693	0.1524	0.0413124	0.0344281	-0.463018	-0.273528	-0.294872	-0.261514	-0.185539	-0.0771592	0.067272	-0.23393	0.24103	-0.400389	0.0285692	-0.00165869	0.0100848	0.068675	-0.337591	0.01068
YCR020C	PET18	thiamine metabolic process	molecular_function	cytosol	-0.0815198	0.367877	-0.114933	-0.546257	0.0227488	-0.1199	-0.216217	0.0162825	-0.0647067	-0.27535	0.00461822	-0.0197997	-0.0927238	-0.0406123	0.241024	0.0932587	0.230325	-0.0283602	-0.264559	-0.228768	-0.134657	0.0235274	-0.345931	-0.271272	-0.449815	-1.34793	0.0562113	-0.00343133
YCR020C-A	MAK31	N-terminal protein amino acid acetylation	peptide alpha-N-acetyltransferase activity	NatC complex	0.171893	0.975204	-1.2202	-1.98648	0.085235	-0.107689	-0.21194	-0.357028	-0.643972	-0.280068	-0.529471	-0.373873	-0.0351539	0.229868	0.618706	0.183977	0.526501	-0.0869419	0.116285	-0.180972	-0.155333	0.462031	0.582665	0.358649	0.0274963	0.750012	0.895685	-0.591028
YCR020W-B	HTL1	transcription elongation from RNA polymerase II promoter; chromatin remodeling; regulation of transcription, DNA-dependent; transcription, DNA-dependent; regulation of cell cycle; response to DNA damage stimulus; cell cycle; nucleosome disassembly	chromatin binding	nucleus; RSC complex	-0.0209765	0.0754	0.101876	0.505923	-0.109511	0.312638	-0.070556	0.853832	-0.498181	-0.533677	-0.158724	-0.240844	-0.212098	0.178245	-0.353689	-0.0128684	0.372317	-0.381213	-0.00912288	-1.17716	0.496139	1.16573	1.95606	0.0934122	-0.303816	0.799037	1.24965	0.166491
YCR021C	HSP30	negative regulation of ATPase activity; response to stress; ion transport	molecular_function; ion channel activity	membrane; integral to membrane; plasma membrane	0.00828224	-1.58923	1.62791	2.16734	-0.755449	0.0388557	0.487492	0.120975	0.333497	-0.49835	-0.369518	-0.440999	-0.365341	0.823859	0.335205	1.07109	2.2636	2.23791	2.90172	1.03779	-0.593122	0.773207	2.74478	4.19766	3.8885	4.8668	4.37574	5.21235
YCR023C	YCR023C	transport; transmembrane transport; biological_process	molecular_function	membrane; fungal-type vacuole membrane; integral to membrane	-0.0726071	-0.0770328	-0.201217	-0.580475	-0.150196	0.0813366	-0.152856	0.136397	-0.0477077	-0.11249	-0.00192473	0.276709	0.256608	0.140073	0.168265	0.605449	0.825439	0.0650491	0.59021	1.23893	-0.13717	0.119248	-0.0779083	-0.278407	-0.0206038	0.304042	0.0220693	0.328658
YCR024C	SLM5	mitochondrial asparaginyl-tRNA aminoacylation; asparaginyl-tRNA aminoacylation; tRNA aminoacylation for protein translation; translation	ATP binding; nucleotide binding; asparagine-tRNA ligase activity; aminoacyl-tRNA ligase activity; ligase activity; nucleic acid binding	mitochondrial matrix; mitochondrion; cytoplasm	-0.0167455	0.13846	0.549484	1.02266	-0.203525	-0.250671	-0.0589508	-9.22839e-06	-0.00801582	-0.193651	-0.204895	0.383803	-0.142061	-0.42755	-0.476489	-0.312496	-0.319749	-0.0537555	0.0126386	0.411479	-0.14553	-0.220538	0.269136	0.0948941	0.0805475	-0.0797576	0.238872	0.70869
YCR024C-A	PMP1	cation transport	enzyme regulator activity	membrane; integral to membrane; plasma membrane	-0.0581111	0.791599	-1.40374	-1.74279	0.391985	0.0703937	0.265351	0.0985318	0.214082	0.303688	0.236956	0.0806237	-0.00399373	0.0242882	0.148254	-0.0857599	0.493525	-0.0132397	0.208719	-0.346629	-0.435788	-0.269416	-0.278552	-0.28195	-0.74842	-0.652932	-0.822676	-1.51961
YCR025C	YCR025C				0.638624		-0.509728	-1.50844	-0.363598	0.0849207	-0.555358	0.0825901	0.0976234	0.299841	-0.295899	-0.627227	0.650754	-0.114372	0.0995079	-0.420512	0.0590248	0.630077	0.725556	0.693836	-0.417205	0.399547	0.452554	-0.115934	0.0919486	-0.969408	0.887497	-0.207039
YCR026C	NPP1	cellular response to phosphate starvation; nucleoside triphosphate metabolic process; metabolic process; phosphate-containing compound metabolic process	nucleoside-triphosphate diphosphatase activity; nucleotide diphosphatase activity; hydrolase activity; phosphodiesterase I activity; nucleoside-triphosphatase activity; catalytic activity; NADH pyrophosphatase activity	cellular_component; membrane; integral to membrane	0.00905061	0.430352	-0.332015	-0.401016	-0.232174	-0.110513	-0.233234	-0.16904	-0.110926	-0.269425	-0.138444	-0.0195262	-0.165587	-0.00801819	-0.0697434	0.0937049	0.245247	-0.211885	0.193083	0.27302	0.0389745	0.104588	0.0922654	-0.0672407	0.0126032	0.341717	0.0581712	0.399843
YCR027C	RHB1	lysine transport; signal transduction; small GTPase mediated signal transduction; GTP catabolic process; retrograde transport, endosome to Golgi; arginine transport	nucleotide binding; GTP binding; GTPase activity	membrane; plasma membrane; extrinsic to plasma membrane	0.134049	-0.405086	0.571199	0.611777	0.301822	0.368912	0.296281	0.121004	0.239073	0.01304	0.0836333	-0.174472	-0.165275	0.0845395	0.0330011	-0.0892052	-0.150891	-0.430093	-0.458211	-0.553439	0.0214457	-0.114401	0.0174424	-0.320217	-0.388344	-0.441387	-0.348852	-0.299103
YCR028C	FEN2	pantothenate transmembrane transport; transport; transmembrane transport; endocytosis	pantothenate transmembrane transporter activity	membrane; fungal-type vacuole membrane; integral to membrane; plasma membrane	-0.0914179	-0.104625	0.635682	0.944001	-0.17399	0.594522	0.189947	0.0115786	0.170227	0.0812117	-0.120266	-0.0979829	0.0276386	0.408885	-0.015031	0.510999	0.651924	-0.207826	-0.158766	0.0670876	0.116131	0.483428	0.0804399	-0.350171	-0.824072	-0.191904	-0.443996	-0.546034
YCR028C-A	RIM1	mitochondrial DNA replication; DNA replication; mitochondrial genome maintenance	DNA binding; single-stranded DNA binding	mitochondrial nucleoid; mitochondrion	0.222798	0.043844	-0.0964749	-0.251833	0.219354	-0.0735407	-0.0602114	0.116654	-0.0476711	0.0193183	-0.134595	-0.0686744	-0.103336	0.0181741	-0.0158927	0.133963	0.00725618	-0.139166	0.0275228	-0.0974677	0.309117	0.031887	0.241394	0.373177	0.23807	0.165834	0.164149	0.116152
YCR030C	SYP1	actin cortical patch assembly; endocytosis; septin cytoskeleton organization; cell cycle	molecular_function	mating projection tip; cellular bud tip; mating projection base; cellular bud neck	-0.0351202	-0.0418456	0.34886	0.673772	-0.433297	-0.361374	-0.254489	-0.268216	-0.334989	-0.107387	-0.0518635	0.367643	-0.00979911	-0.422911	0.0956855	0.232606	0.282024	0.382958	0.623664	1.10876	0.0174565	-0.0727786	0.2771	0.288099	0.495881	0.88229	0.962599	1.30122
YCR031C	RPS14A	ribosomal small subunit assembly; ribosome biogenesis; maturation of SSU-rRNA from tricistronic rRNA transcript (SSU-rRNA, 5.8S rRNA, LSU-rRNA); translation; cytoplasmic translation; rRNA processing	mRNA binding; structural constituent of ribosome	ribosome; nucleus; 90S preribosome; cytoplasm; small-subunit processome; nucleolus; ribonucleoprotein complex; cytosolic small ribosomal subunit	0.20582	0.359395	-0.323237	-1.16806	0.193913	0.0516178	-0.0381968	0.00473943	-0.0429482	0.11334	0.00698181	0.0962276	0.0538123	0.178008	0.127509	-0.456721	0.00407481	0.0410458	-0.041874	-0.163291	-0.0295048	0.106097	-0.185963	0.269303	0.215425	0.115605	-0.0344349	-0.556428
YCR032W	BPH1	intracellular protein transport; response to pH; fungal-type cell wall organization	molecular_function	membrane; extrinsic to membrane; cytosol; mitochondrion; cytoplasm	-0.159445	0.308917	-0.819272	-0.700804	-0.0280401	-0.406121	-0.217327	-0.217648	0.0584693	-0.0444498	-0.074934	-0.128113	-0.320388	-0.41258	-0.0973817	-0.238855	-0.2504	-0.157763	-0.227128	-0.351938	-0.352819	-0.643317	-0.504377	-0.487711	-0.149327	-0.220814	-0.0491892	-0.114065
YCR033W	SNT1	negative regulation of meiosis; regulation of transcription, DNA-dependent; positive regulation of stress-activated MAPK cascade; histone deacetylation	molecular_function; DNA binding; chromatin binding	nucleus; Set3 complex; cytosol; Rpd3L-Expanded complex	0.138651	-0.127063	0.586314	1.18771	-0.271577	0.369253	-0.0485436	-0.161678	-0.0539632	-0.24929	-0.191638	-0.0418596	0.399003	0.229905	0.151698	-0.0560474	-0.103344	0.0151008	-0.737464	0.219469	0.443416	0.563254	-0.179232	-0.240636	0.269575	-0.396316	-0.548577	0.0569358
YCR034W	FEN1	fatty acid elongation; fatty acid metabolic process; sphingolipid biosynthetic process; fatty acid biosynthetic process; lipid metabolic process; vesicle-mediated transport	fatty acid elongase activity; transferase activity	membrane; endoplasmic reticulum; integral to membrane	0.00143716	1.10889	-2.0536	-2.61119	0.126819	0.285935	0.350075	0.139572	0.303159	0.199013	0.262445	0.0903082	0.282779	0.435534	0.217753	0.367985	0.683298	0.283904	0.543798	0.0301397	-0.00761651	0.170934	0.0364409	-0.00761902	-0.323593	-0.251183	-0.312155	-0.791234
YCR035C	RRP43	nuclear-transcribed mRNA catabolic process, 3'-5' exonucleolytic nonsense-mediated decay; nuclear-transcribed mRNA catabolic process, exonucleolytic, 3'-5'; rRNA processing; exonucleolytic trimming to generate mature 3'-end of 5.8S rRNA from tricistronic rRNA transcript (SSU-rRNA, 5.8S rRNA, LSU-rRNA); nuclear polyadenylation-dependent rRNA catabolic process; nuclear-transcribed mRNA catabolic pr…	molecular_function; RNA binding	nucleoplasm; nucleus; nucleolus; cytoplasmic exosome (RNase complex); nuclear exosome (RNase complex); cytoplasm; exosome (RNase complex)	-0.209379	0.341782	-0.774667	-1.06869	0.0207305	0.215711	-0.0766425	-0.28128	0.0289978	-0.261295	-0.389663	-0.422543	-0.230716	-0.044601	-0.233056	-0.401224	-0.32382	-0.587884	-0.945134	-0.682318	0.171698	-0.220162	-0.821086	-0.79173	-0.816203	-0.835028	-0.951574	-0.655539
YCR036W	RBK1	phosphorylation; D-ribose catabolic process; carbohydrate metabolic process; D-ribose metabolic process	ATP binding; kinase activity; nucleotide binding; phosphotransferase activity, alcohol group as acceptor; ribokinase activity; transferase activity	nucleus; cytoplasm	0.0225148	-0.0663621	0.341932	0.240283	0.343036	-0.346673	0.0769436	0.144043	0.274085	0.471713	0.265158	0.549188	-0.175947	0.180362	0.118299	0.250536	0.326681	0.223667	0.457579	0.0257417	0.00451766	-0.0450873	0.00341221	0.411387	0.274229	0.537922	0.499217	0.330305
YCR037C	PHO87	transport; transmembrane transport; phosphate ion transport; polyphosphate metabolic process; regulation of phosphate transmembrane transport; plasma membrane selenite transport	inorganic phosphate transmembrane transporter activity	membrane; integral to membrane; plasma membrane	-0.061505	0.152859	-0.506673	-0.822787	0.127682	0.320777	0.301078	0.198574	0.267429	0.300053	0.302515	0.0447533	0.0444164	0.329916	0.0233664	0.297157	0.527084	0.0965467	0.0754128	-0.288705	0.0604088	0.286202	0.122574	-0.180832	-0.364515	-0.335436	-0.203557	-0.686696
YCR038C	BUD5	bipolar cellular bud site selection; small GTPase mediated signal transduction; regulation of small GTPase mediated signal transduction; axial cellular bud site selection	Ras guanyl-nucleotide exchange factor activity; guanyl-nucleotide exchange factor activity	cell cortex; intracellular; incipient cellular bud site; cellular bud neck; cytoplasm	-0.701807	-1.24395	0.420254	1.07354	-1.11016	-0.0159157	0.220486	-0.070322	-0.114533	0.123064	0.174517	0.0133484	0.0968796	-0.640481	-0.109082	-0.264362	-1.0583	-0.157215	0.148959	0.424885	0.185283	-0.203365	0.588527	-0.00944123	0.0684047	-0.378709	0.41631	0.116059
YCR038W-A	YCR038W-A				0.838752	0.149875	1.05517	2.02415	0.439204	1.254	0.531834	0.529624		0.650022	1.47802	1.04548	0.155013	0.132304	0.25808	-0.176084	-0.330635	1.67972	1.30942	1.26423	0.0745279	-0.251491	0.400173	0.238382	-1.29808	1.23241	0.676931	-0.826279
YCR039C	MATALPHA2	regulation of transcription, DNA-dependent; negative regulation of mating-type specific transcription from RNA polymerase II promoter; transcription, DNA-dependent	DNA binding; sequence-specific DNA binding; sequence-specific DNA binding transcription factor activity; DNA binding, bending; RNA polymerase II transcription regulatory region sequence-specific DNA binding transcription factor activity involved in negative regulation of transcription	nucleus	-0.126741	-0.205797	0.404342	0.443045	-0.244777	-0.339887	-0.186791	0.0173959	-0.70436	-0.467064	-0.640274	-0.40955	-0.302042	0.149544	-0.220144	-0.00741052	0.0801967	-0.0177809	0.211469	-0.455884	-0.181896	-0.130345	0.216592	0.0776957	-0.38375	0.0460316	0.207254	0.145942
YCR040W	MATALPHA1	positive regulation of mating-type specific transcription, DNA-dependent; regulation of transcription from RNA polymerase II promoter; regulation of transcription, DNA-dependent; transcription, DNA-dependent; regulation of mating-type specific transcription, DNA-dependent	mating pheromone activity; DNA binding; transcription coactivator activity; sequence-specific DNA binding; DNA binding, bending	nucleus	0.379434	-0.141785	0.882418	0.714341	0.0408544	-0.735016	-0.22006	-0.552332	-0.237935	0.118074	-1.19142	-0.167844	-0.137702	-0.423815	0.0837883	0.122294	0.369615	-0.102831	-0.0146781	-0.620784	0.125818	0.172404	0.348274	0.108934	0.0407722	0.361243	0.369519	0.281717
YCR041W	YCR041W				-0.0618451	-0.241817	0.737747	1.0162	-0.257662	0.329071	-0.115706	-0.0399787	-0.70406	-0.116912	0.0682774	-0.532534	-0.0645469	0.158705	0.0322135	0.0484092	0.147067	0.11618	0.212979	-0.589265	-0.0770971	-0.0762523	0.340595	-0.157027	-0.22589	0.197066	0.145521	-0.0808816
YCR042C	TAF2	regulation of transcription, DNA-dependent; transcription, DNA-dependent; RNA polymerase II transcriptional preinitiation complex assembly; transcription from RNA polymerase II promoter	chromatin binding; RNA polymerase II core promoter sequence-specific DNA binding transcription factor activity involved in preinitiation complex assembly	nucleus; transcription factor TFIID complex	0.256945	0.982945	-0.927505	-0.820684	0.267601	0.256862	0.272781	0.214199	0.490937	0.610437	0.458576	0.21166	0.14204	0.124219	0.321189	0.05106	0.0105982	0.127702	0.0661754	-0.0404182	0.186988	-0.0649741	0.107536	-0.120768	0.0927819	-0.0582765	-0.256726	-0.325063
YCR043C	YCR043C	biological_process	molecular_function	Golgi apparatus; mating projection tip	0.669623	1.69853	-1.29774	-2.22312	0.141124	0.131608	0.0524329	-0.199312	-0.248466	-0.0156453	-0.225156	-0.00159113	-0.427983	-0.110522	0.170371	0.049373	-0.283569	0.0942148	0.0625643	-0.159689	-0.125981	0.343177	0.023752	0.2062	0.424276	-0.105392	-0.0217028	-0.393428
YCR044C	PER1	GPI anchor biosynthetic process; cellular manganese ion homeostasis	molecular_function	membrane; endoplasmic reticulum; fungal-type vacuole membrane; integral to membrane; endoplasmic reticulum membrane	0.201537	0.259443	-0.258789	-0.588379	0.348318	-0.13288	0.0832666	-0.0203099	0.144528	0.463779	0.024656	0.383358	-0.0859332	0.233263	0.298873	0.612573	0.704589	0.4166	0.515925	0.0527678	-0.162717	0.0562896	-0.0841616	0.101549	-0.188697	0.216117	0.321257	-0.11907
YCR046C	IMG1	mitochondrial translation; translation	structural constituent of ribosome	ribosome; mitochondrial large ribosomal subunit; ribonucleoprotein complex; intracellular; mitochondrion	0.283533	0.0567282	0.0674441	-0.306296	0.174278	0.109232	0.0791248	0.0725139	0.185755	0.353328	0.159302	0.387175	0.147936	0.235706	0.54265	0.28284	0.236158	0.404505	0.418462	0.710449	-0.285913	-0.0557989	-0.0401705	0.230783	0.259006	0.248431	0.493957	0.515305
YCR047C	BUD23	metabolic process; ribosomal small subunit export from nucleus; cellular bud site selection; endonucleolytic cleavage in ITS1 to separate SSU-rRNA from 5.8S rRNA and LSU-rRNA from tricistronic rRNA transcript (SSU-rRNA, 5.8S rRNA, LSU-rRNA); methylation; rRNA (guanine-N7)-methylation	S-adenosylmethionine-dependent methyltransferase activity; rRNA (guanine) methyltransferase activity; methyltransferase activity; transferase activity	nucleus; nucleolus; cytoplasm	0.216139	0.954705	-0.900974	-1.38172	0.255228	0.92905	0.0668477	-0.537237	-0.528947	-0.242458	-0.547573	-0.798529	0.08923	0.0652062	-0.0257657	-0.268936	-0.322438	-0.636235	-0.943758	-1.05786	0.214023	0.395303	-0.501585	-0.573917	-0.637706	-1.03878	-1.08226	-1.26874
YCR048W	ARE1	sterol metabolic process	transferase activity, transferring acyl groups; transferase activity; ergosterol O-acyltransferase activity; lanosterol O-acyltransferase activity; cholesterol O-acyltransferase activity; O-acyltransferase activity	membrane; endoplasmic reticulum; integral to membrane; endoplasmic reticulum membrane	-0.0132416	0.172104	-0.475795	-0.379297	-0.0716697	0.345168	-0.156095	-0.108888	0.0324296	0.0373058	-0.100568	-0.339845	-0.129107	0.22678	0.0045974	0.06979	0.456228	-0.0220278	0.0424565	0.170501	-0.0927892	0.0697492	-0.102855	-0.161008	-0.305427	0.0197196	-0.0195561	-0.0358646
YCR051W	YCR051W	biological_process	molecular_function	nucleus; cytoplasm	0.270096	0.532618	-0.277598	-0.663891	0.269938	0.195889	0.327765	0.24895	-0.00721888	0.0855582	-0.0774638	-0.36518	-0.0551454	0.165411	-0.00125525	-0.0983447	-0.0753687	-0.269994	-0.377741	-0.8563	0.0808848	0.0688022	-0.401876	-0.0944416	-0.187226	-0.420814	-0.809371	-0.802551
YCR052W	RSC6	G1 phase of mitotic cell cycle; regulation of transcription, DNA-dependent; transcription, DNA-dependent; nucleosome positioning; nucleosome disassembly; positive regulation of transcription elongation from RNA polymerase II promoter; ATP-dependent chromatin remodeling; G2/M transition of mitotic cell cycle; chromatin modification	DNA translocase activity	nucleus; RSC complex	-0.150072	0.376153	-0.591023	-0.609876	-0.325085	0.187093	-0.0835302	-0.249654	-0.443535	-0.313365	-0.154356	-0.434436	0.107104	-0.135604	-0.290893	-0.233932	-0.405368	-0.219202	-0.565354	0.316588	-0.128346	-0.254956	-0.245091	-0.49175	-0.258131	-0.54142	-0.788621	-0.300157
YCR053W	THR4	cellular amino acid biosynthetic process; cellular amino acid metabolic process; threonine biosynthetic process	lyase activity; threonine synthase activity; pyridoxal phosphate binding	nucleus; cytoplasm	-0.0849089	0.132299	-0.841945	-1.0705	-0.0488896	0.0115312	0.111759	0.182122	0.199367	-0.0649604	-0.0618902	-0.0615685	0.0639807	0.0113803	-0.193708	-0.321855	-0.582603	-0.358601	-0.40009	-0.291226	0.138312	-0.22378	-0.290777	-0.0183478	0.0754947	-0.413803	-0.665872	-0.241544
YCR054C	CTR86	cellular amino acid biosynthetic process; threonine biosynthetic process; biological_process	molecular_function	nucleus; cytoplasm	-0.30643	1.07006	-1.79618	-1.77735	-0.429626	0.499069	-0.385699	-0.387481	0.0653372	-0.490702	-0.154515	-0.423463	-0.0239045	-0.570344	-0.506519	-0.514073	-0.743191	-0.897414	-1.01313	-1.00363	0.249035	0.157846	-0.420998	-0.415453	-0.0705894	-0.667632	-0.276189	0.0165767
YCR057C	PWP2	maturation of SSU-rRNA from tricistronic rRNA transcript (SSU-rRNA, 5.8S rRNA, LSU-rRNA); endonucleolytic cleavage to generate mature 5'-end of SSU-rRNA from (SSU-rRNA, 5.8S rRNA, LSU-rRNA); cytokinesis; endonucleolytic cleavage in ITS1 to separate SSU-rRNA from 5.8S rRNA and LSU-rRNA from tricistronic rRNA transcript (SSU-rRNA, 5.8S rRNA, LSU-rRNA); rRNA processing; endonucleolytic cleavage in 5…	snoRNA binding	Pwp2p-containing subcomplex of 90S preribosome; nucleus; 90S preribosome; nucleolus; small-subunit processome; ribonucleoprotein complex; cytoplasm	0.238633	0.902292	-1.77284	-2.25034	-0.0132492	1.31395	0.237742	-0.337999	0.0550503	-0.0311671	-0.0812024	-0.872968	0.159048	-0.159651	-0.710564	-0.622558	-0.59146	-0.865945	-1.17925	-1.03482	0.268829	0.36945	-0.294261	-0.710962	-0.26189	-1.58149	-1.29069	-1.09812
YCR059C	YIH1	negative regulation of protein phosphorylation; regulation of translation	actin binding; ribosome binding; protein kinase inhibitor activity; actin monomer binding	ribosome; nucleus; cytoplasm; polysome	0.262276	0.80946	-1.01769	-1.69098	0.321637	0.325503	0.104108	-0.0448424	0.165389	0.145096	-0.106964	0.0216514	0.113221	0.298783	0.447853	0.553497	0.554919	0.112315	0.0201894	0.115636	0.410334	0.353046	-0.105569	0.172954	0.0596468	0.0755295	0.017537	-0.346853
YCR060W	TAH1	protein folding; box C/D snoRNP assembly	chaperone binding	nucleus; R2TP complex; cytoplasm	0.145397	0.433406	-0.432405	-0.879691	-0.0579176	-0.636955	-0.218305	-0.168622	-0.297242	0.0703279	-0.297787	-0.149743	-0.331807	-0.0230614	0.111007	-0.558474	0.212692	-0.198732	-0.237354	-0.484541	0.024731	0.124147	0.00441758	0.664458	0.427426	1.23982	1.07215	0.60209
YCR061W	YCR061W	regulation of cell size	molecular_function	membrane; integral to membrane; cytoplasm	0.355148	-0.267323	0.934018	1.26118	-0.682831	0.100248	-0.488589	-0.684127	-0.175748	-0.341114	-0.0382239	0.448229	0.319166	-0.200071	0.311371	0.34838	1.04503	0.51834	0.751395	2.31887	0.236922	0.34037	0.426673	0.187657	0.789283	0.918166	1.19341	1.51999
YCR063W	BUD31	mRNA processing; mRNA splicing, via spliceosome; cellular bud site selection; RNA splicing; cell cycle	molecular_function	nucleus; U2 snRNP	0.281951		-0.735301		-0.17238	0.700068	-0.295279	-0.286049	-0.00431167	-0.672726	-0.157332	-0.511704	0.353169	0.24618	0.126112	0.145521	0.0834967	0.0561781	-0.555218	0.11528	-0.266627	0.474989	0.637327	-0.248898	-0.131535	-0.6446	0.0106085	-0.0413422
YCR064C	YCR064C				0.217932			-1.51981	-0.00723935	-0.0922502	-0.30813	1.25939	-0.507533	0.808518	-1.35465	0.266703	0.305441	0.454358	0.0442123	-0.0895919	1.39114	0.204435		-0.578721		-0.0229119	0.448464	-0.823012	-0.298497	-0.113013	0.53233	-1.58616
YCR065W	HCM1	positive regulation of transcription involved in S-phase of mitotic cell cycle; spindle pole body organization; regulation of transcription, DNA-dependent; cellular response to oxidative stress; positive regulation of transcription from RNA polymerase II promoter; transcription, DNA-dependent; regulation of sequence-specific DNA binding transcription factor activity; mitochondrion organization	DNA binding; sequence-specific DNA binding; transcription factor binding; sequence-specific DNA binding transcription factor activity; RNA polymerase II distal enhancer sequence-specific DNA binding transcription factor activity; double-stranded DNA binding	nucleus; transcription factor complex; cytoplasm; nuclear chromatin	0.603609	2.03713	-1.81479	-2.05395	-0.0415063	0.245441	-0.297092	-0.491242	-0.305992	-0.179453	0.0733742	0.227978	0.554713	-0.214875	-0.184624	-0.071955	0.192248	0.451288	0.292321	1.12232	0.209298	-0.188299	-0.785382	-0.232419	0.276782	-0.149439	-0.378304	0.0644323
YCR066W	RAD18	error-free postreplication DNA repair; error-free translesion synthesis; error-prone translesion synthesis; DNA repair; protein monoubiquitination; protein ubiquitination; response to DNA damage stimulus	DNA binding; single-stranded DNA-dependent ATPase activity; nucleic acid binding; ubiquitin-protein ligase activity; ligase activity; metal ion binding; single-stranded DNA binding; damaged DNA binding; zinc ion binding	nucleus; nuclear chromatin	-0.0954369	0.151727	-0.2823	-0.206213	-0.644739	-0.44107	0.0397085	-0.0491356	-0.356751	-0.157933	-0.1028	-0.12528	-0.0724124	-0.343965	-0.650337	-0.591376	-0.379885	-0.385204	0.201689	-0.261228	-0.408918	-0.572828	-0.794554	-0.397819	-0.182835	-0.331424	-0.341424	-0.109078
YCR067C	SED4	transport; positive regulation of GTPase activity; regulation of COPII vesicle coating; protein transport; vesicle-mediated transport	Sar GTPase activator activity; GTPase activator activity	membrane; endoplasmic reticulum; integral to endoplasmic reticulum membrane; Golgi apparatus; integral to membrane; endoplasmic reticulum membrane; Golgi membrane	-0.173716	-0.046423	-0.516967	-0.334151	-0.11471	0.0677925	0.00835862	-0.0311514	0.227676	0.195762	0.185806	0.113856	-0.130758	-0.395348	-0.127468	0.0496263	0.39066	0.0308283	0.338774	0.412214	-0.119896	0.0233877	0.333301	0.0709072	0.195182	0.53239	0.192551	0.304798
YCR068W	ATG15	lipid catabolic process; membrane disassembly; vacuolar protein processing; autophagy; multivesicular body membrane disassembly; lipid metabolic process; piecemeal microautophagy of nucleus	molecular_function; hydrolase activity; triglyceride lipase activity; retinyl-palmitate esterase activity	membrane; endoplasmic reticulum; multivesicular body membrane; late endosome membrane; Golgi membrane; endosome; Golgi apparatus; integral to membrane; endoplasmic reticulum membrane; vacuolar lumen	0.187677	0.360831	1.09014	1.59297	0.2971	1.59658	0.251569	-0.153082	0.384411	0.394498	0.216246	0.196519	1.33086	-0.0704484	1.35809	1.75919	0.512323	0.635775	1.08489	3.07989	0.267276	1.18121	1.17602		0.00961331	0.604956	1.65679	1.25048
YCR069W	CPR4	protein folding; protein peptidyl-prolyl isomerization; biological_process	peptidyl-prolyl cis-trans isomerase activity; isomerase activity	membrane; integral to membrane	-0.131691	-0.191782	0.0617621	0.0959965	-0.141642	-0.376393	-0.188359	-0.149409	0.122205	-0.0523187	0.118016	0.456029	-0.0156656	0.0405556	0.134438	0.504656	0.490917	0.280683	0.497671	0.860873	-0.0743178	-0.0939341	-0.186634	0.0922578	0.0866054	0.275448	0.513157	0.69422
YCR071C	IMG2	mitochondrial translation; translation	structural constituent of ribosome	ribosome; mitochondrial large ribosomal subunit; ribonucleoprotein complex; intracellular; mitochondrion	0.027223	-0.355575	0.671421	0.525847	0.452914	0.0151037	0.148623	0.0504141	-0.615719	0.102661	-0.140752	0.0891249	0.0942045	0.149037	0.505564	0.156689	-0.372022	-0.376948	0.00230991	0.325991	0.0976975	0.0764707	0.423809	0.404625	0.408869	0.230355	0.252712	0.262256
YCR072C	RSA4	ribosome biogenesis; ribosomal large subunit assembly	molecular_function	ribosome; nucleus; nucleolus	0.09448	1.48954	-2.2617	-3.1822	-0.0600535	1.09418	-0.162603	-0.521795	-0.166753	-0.250208	-0.0849311	-0.951285	-0.0469638	-0.306133	-0.613854	-0.54076	-0.826071	-1.14623	-1.5078	-1.89193	-0.172049	0.229311	-0.874566	-0.966878	-0.839511	-1.8828	-1.76092	-1.57706
YCR073C	SSK22	phosphorylation; protein phosphorylation; MAPK cascade involved in osmosensory signaling pathway	MAP kinase kinase kinase activity; protein serine/threonine kinase activity; ATP binding; nucleotide binding; protein kinase activity; kinase activity; transferase activity; transferase activity, transferring phosphorus-containing groups	cellular_component	0.183224	0.711811	-0.206179	0.58615	-0.152926	0.19908	-0.23711	-0.469302	-0.673977	-0.395519	-0.423611	-0.828461	-0.137944	-0.47692	-0.908131	-0.751259	-0.921536	-0.905811	-0.861574	-1.34389	-0.335988	-0.548548	-0.866453	-1.1603	-1.54313	-1.65829	-1.9741	-2.43296
YCR073W-A	SOL2	pentose-phosphate shunt; tRNA export from nucleus; carbohydrate metabolic process	molecular_function; 6-phosphogluconolactonase activity	cytosol; cytoplasm	0.150298	-0.326195	0.821965	0.894453	0.172441	0.0982833	0.21518	-0.021318	0.109033	0.242916	0.191051	0.369545	0.108401	0.177346	0.221908	0.256566	0.480419	0.49571	0.658685	1.02211	0.352199	0.240594	0.165376	0.401253	0.548974	0.309172	0.594427	0.677552
YCR075C	ERS1	transport; transmembrane transport; L-cystine transport	L-cystine transmembrane transporter activity	membrane; endosome membrane; vacuolar membrane; endosome; fungal-type vacuole; integral to membrane; vacuole	0.18191	-0.746279	1.20396	0.760815	0.300996	-0.589288	0.135913	0.0840548	0.579691	0.377384	0.395376	0.92727	0.111259	0.636091	0.61562	1.10466	1.53607	0.878482	1.18954	0.940312	0.273921	0.406126	0.888762	0.765983	0.361349	1.47674	1.34743	1.027
YCR076C	FUB1	biological_process	proteasome binding	cellular_component	0.18956	-0.480485	0.958789	1.06039	0.280775	-0.301006	-0.124533	-0.149618	-0.462183	0.072663	-0.358683	0.0975536	0.0579545	-0.0143149	0.284741	0.266798	0.0809559	0.100454	0.100583	0.241179	-0.0442343	0.416947	0.537596	0.157158	0.0764351	0.903285	1.0433	0.611195
YCR077C	PAT1	mRNA processing; deadenylation-dependent decapping of nuclear-transcribed mRNA; regulation of translation; formation of translation preinitiation complex; regulation of translational initiation; negative regulation of translational initiation; cell division; cytoplasmic mRNA processing body assembly; cell cycle	molecular_function; RNA binding	nucleus; cytosolic small ribosomal subunit; cytoplasmic mRNA processing body; cytoplasm	0.0959446	0.539449	-0.550471	-0.510897	-0.15055	0.440734	-0.0839336	-0.291656	-0.248593	-0.409275	-0.150233	-0.438502	0.190383	0.0575652	0.212019	0.114415	-0.381771	-0.207645	-0.332513	0.581814	-0.350768	-0.0808421	-0.233792	-0.10919	-0.0869511	-0.407611	-0.617986	-0.534307
YCR079W	PTC6	protein dephosphorylation; macroautophagy; mitochondrion degradation; positive regulation of catalytic activity	hydrolase activity; phosphoprotein phosphatase activity; catalytic activity; protein serine/threonine phosphatase activity	mitochondrial matrix; mitochondrial intermembrane space; mitochondrion	-0.042301	-0.489804	0.551019	0.752538	-0.153679	-0.150543	-0.238875	-0.113882	0.173329	-0.10611	-0.0043881	0.0788271	0.104573	0.0847663	0.140756	0.150619	0.291507	0.455744	0.506409	0.670676	-0.10654	-0.221531	-0.287916	-0.034559	0.0202442	0.236881	0.121958	0.190568
YCR081W	SRB8	negative regulation of transcription from RNA polymerase II promoter; regulation of transcription from RNA polymerase II promoter; positive regulation of transcription from RNA polymerase II promoter; regulation of transcription, DNA-dependent; transcription, DNA-dependent; positive regulation of transcription by galactose	RNA polymerase II transcription coactivator activity; RNA polymerase II transcription cofactor activity	nucleus; mediator complex	0.383035	1.11665	-0.435425	0.453176	0.172164	0.586197	-0.0415697	0.116561	0.373709	0.113167	0.1742	-0.0062195	0.484182	0.0427883	-0.0904222	-0.198712	-0.30837	-0.11688	-0.352705	0.459523	0.626069	0.504414	0.0771448	-0.00198287	0.435313	-0.314666	-0.136941	0.119628
YCR082W	AHC2	histone acetylation	histone acetyltransferase activity	nucleus; Ada2/Gcn5/Ada3 transcription activator complex; cytoplasm	0.0660707	0.238642	0.123796	0.414326	0.0348185	0.273032	-0.0583906	-0.166612	0.214568	0.0301721	0.033797	0.0954962	0.0626377	0.172514	0.243585	0.321386	0.183301	0.128358	0.0129529	0.285368	0.142981	0.0979037	0.08589	0.0731613	0.437394	0.320466	0.415867	0.27482
YCR083W	TRX3	glycerol ether metabolic process; electron transport chain; cellular response to oxidative stress; cell redox homeostasis	disulfide oxidoreductase activity; protein disulfide oxidoreductase activity; electron carrier activity	mitochondrion	-0.234075	0.0390121	0.0628796	0.0333579	-0.144929	-0.289631	-0.184965	0.0257911	-0.168029	-0.0804626	-0.319638	-0.162822	-0.391412	-0.0112298	0.0499951	0.159033	0.78177	0.0486642	0.286052	-0.256411	-0.233885	0.150994	0.305372	0.283285	0.0844911	0.936066	1.01997	0.842676
YCR084C	TUP1	negative regulation of transcription from RNA polymerase II promoter during mitosis; regulation of transcription from RNA polymerase II promoter in response to osmotic stress; regulation of transcription, DNA-dependent; histone exchange; negative regulation of transcription from RNA polymerase II promoter by glucose; regulation of response to DNA damage stimulus; transcription, DNA-dependent; neg…	histone binding; mediator complex binding; phosphatidylinositol-3,5-bisphosphate binding; ubiquitin binding; histone deacetylase binding; RNA polymerase II transcription factor binding transcription factor activity involved in negative regulation of transcription	transcriptional repressor complex; nucleus	0.130878	0.491811	-0.220312	-0.291612	0.0843952	0.504661	0.140114	-0.0764532	-0.0168225	-0.079501	-0.126299	-0.124592	0.639014	0.105969	0.102769	-0.052378	-0.57465	-0.08487	-0.381073	0.592589	0.54163	0.154466	-0.116043	0.392768	0.374014	0.0380646	-0.371908	-0.0105703
YCR086W	CSM1	rDNA condensation; meiosis; homologous chromosome segregation; protein localization to nucleolar rDNA repeats; meiotic chromosome segregation	molecular_function	nucleus; nucleolus; nuclear envelope; monopolin complex; chromosome; chromosome, centromeric region	0.146415	0.0505775	-0.345912	-0.784094	-0.00771382	-0.388916	-0.0864473	-0.0221183	-0.220142	-0.0407541	-0.0298203	0.088482	-0.256001	-0.240883	-0.130407	-0.320017	-0.17337	-0.220422	-0.178782	-0.109393	0.0865402	-0.242488	-0.335618	-0.462729	-0.0660225	-0.112716	-0.232678	-0.335188
YCR087C-A	YCR087C-A	biological_process	molecular_function; metal ion binding	nucleus; nucleolus	0.020257	1.02028	-1.79073	-2.61153	0.307504	0.178518	0.430584	-0.06306	-0.245475	-0.0451205	-0.347872	-0.952768	-0.0770498	0.307996	0.186172	0.00256639	-0.269903	-0.344626	-0.648849	-1.88247	-0.156823	-0.0338536	-0.485538	-0.254108	-0.7091	-0.74075	-1.26084	-1.61828
YCR087W	YCR087W				1.67032	0.558846	0.867325	-0.102574		0.790862	0.233258	-0.0470533			-0.293329	0.379745	0.158875	1.44927	-0.202821	0.547496	0.0685512		-0.0546111	0.373899		-0.113741	-0.906418	-0.0496869	-0.424816	-0.137004		-0.812693
YCR088W	ABP1	actin cortical patch assembly; protein localization	actin binding; actin filament binding	cytoskeleton; actin cortical patch; cell cortex; mating projection tip; intracellular; cytoplasm	0.114639	-0.110887	0.0167709	0.0872269	0.224094	0.098909	-0.116876	-0.147658	-0.0828896	0.0924483	0.102063	0.233861	-0.0264628	-0.110853	-0.217692	-0.294273	-0.319021	-0.151579	0.0565543	0.75942	-0.0337289	-0.359128	-0.404816	0.107054	0.375142	0.164139	0.183245	0.514805
YCR089W	FIG2	invasive growth in response to glucose limitation; cell adhesion; cell morphogenesis involved in conjugation with cellular fusion; filamentous growth of a population of unicellular organisms; conjugation; regulation of cell shape; cytogamy; response to pheromone	molecular_function	fungal-type cell wall; membrane; cell wall; extracellular region; anchored to membrane; mating projection	0.0811645	0.514459	-0.222238	0.550652	0.0599199	0.298309	0.259706	0.424606	0.611383	0.49954	0.682736	0.202786	0.143533	0.00624717	0.0182568	0.00750061	0.0821317	0.224343	0.0222324	0.0400744	-0.145336	-0.295161	-0.752022	-0.813585	-0.136989	-1.63628	-0.696018	-0.94117
YCR090C	YCR090C	biological_process	molecular_function	nucleus; cytoplasm	0.00548005	-0.308085	0.845993	0.490861	0.0731449	-0.0971287	0.117626	0.203208	-0.371733	-0.12674	-0.170042	-0.147266	0.166295	0.252342	-0.0154937	0.467862	0.347408	-0.102086	0.128158	-0.548123	-0.253026	0.323654	0.881998	0.0944833	-0.396857	0.119532	0.318217	-0.161942
YCR091W	KIN82	transport; phosphorylation; phospholipid translocation; lipid transport; protein phosphorylation; response to pheromone	protein serine/threonine kinase activity; ATP binding; kinase activity; nucleotide binding; protein kinase activity; transferase activity; transferase activity, transferring phosphorus-containing groups	cellular_component	-0.518111	-1.62644	2.00201	2.12774	-0.0477262	-0.178696	-0.07237	-0.432182	-0.657828	-0.475953	-0.0900508	0.485841	-0.135588	-0.871946	-1.24773	-0.41999	-0.589676	-0.876516	-0.0102613	1.03075	-0.809488	-0.181126	-0.0673862	-0.147173	0.928583	1.63701	1.99186	2.14323
YCR092C	MSH3	DNA repair; mismatch repair; removal of nonhomologous ends; meiotic mismatch repair; reciprocal meiotic recombination; mitotic recombination; maintenance of DNA repeat elements; response to DNA damage stimulus; DNA recombination	DNA binding; DNA insertion or deletion binding; ATP binding; mismatched DNA binding; loop DNA binding; double-strand/single-strand DNA junction binding; damaged DNA binding; nucleotide binding; Y-form DNA binding; DNA-dependent ATPase activity	nuclear chromosome; nucleus; MutSbeta complex; cytoplasm	-0.0744709	2.06217	-2.80472	-3.21973	-0.235819	-0.176925	-0.154571	-0.151189	0.144237	0.0245938	-0.0584309	-0.257842	-0.0441201	-0.0885099	0.0325676	0.0263427	-0.459927	-0.121521	0.0257759	0.0790634	-0.191862	-0.331986	-0.357875	-0.487494	-0.168356	-0.26163	-0.702951	-0.36667
YCR093W	CDC39	pseudohyphal growth; regulation of transcription, DNA-dependent; nuclear-transcribed mRNA catabolic process, deadenylation-dependent decay; transcription, DNA-dependent; transcription elongation from RNA polymerase II promoter; regulation of transcription from RNA polymerase II promoter; positive regulation of transcription elongation from RNA polymerase II promoter; nuclear-transcribed mRNA poly…	molecular_function	nucleus; cytoplasm; CCR4-NOT core complex	-0.100403	0.755962	-1.64258	-1.6261	0.0232496	0.173163	0.219268	-0.064091	0.130165	0.0733764	0.315793	-0.071721	-0.0388353	0.0428534	0.0646189	-0.356202	-0.417832	0.020965	-0.0687008	0.0505021	-0.270932	-0.259054	-0.13491	-0.310061	0.0671493	0.0853822	-0.0985568	-0.295271
YCR094W	CDC50	intracellular protein transport; phospholipid translocation; endocytosis; actin cortical patch localization	phospholipid-translocating ATPase activity	membrane; endosome; late endosome membrane; integral to membrane; trans-Golgi network	-0.0253011	-0.0046981	-0.182228	-0.193951	-0.128812	-0.0968703	-0.20997	-0.0571301	-0.139439	-0.20147	-0.304883	-0.00886912	-0.131472	0.0382894	-0.12324	0.441274	0.212731	-0.281834	-0.315129	-0.220982	0.0581134	0.00111041	-0.135376	-0.167332	-0.683675	-0.0902393	-0.0918808	0.0464383
YCR095C	OCA4	biological_process	molecular_function	cytoplasm	-0.0103052	-0.0305499	0.246719	0.0159833	0.0820388	-0.325686	-0.290369	-0.346901	-0.301823	-0.36616	-0.406397	-0.257855	0.0543413	0.252514	0.000172742	-0.166694	-0.00429494	-0.29374	0.0175231	-0.584455	-0.338009	0.268354	-0.0514406	-0.196533	-0.373232	-0.617744	0.0502147	-0.181981
YCR096C	HMRA2	regulation of transcription, DNA-dependent; biological_process	DNA binding; sequence-specific DNA binding; sequence-specific DNA binding transcription factor activity	cellular_component; nucleus	-0.148594	-0.112939	0.277254	0.531788	-0.249348	-0.35112	-0.282326	-0.0792977	-0.501403	-0.530801	-0.550167	-0.342884	-0.373836	-0.0140878	-0.263332	-0.0318811	0.220485	-0.0271915	0.149169	-0.318045	-0.205484	-0.137336	0.135613	-0.246511	-0.170123	0.404094	0.22183	0.0806186
YCR097W-A	YCR097W-A				0.21841	-0.274474	1.13897	1.06624	-0.066938	0.304178	-0.0247688	-0.200479	-0.33295	-0.0791155	-0.251519	-0.155357	0.195825	0.0909287	0.27407	0.132273	0.218487	-0.02239	0.147933	-0.276942	-0.167829	0.179518	0.315698	0.267453	-0.178016	-0.0157384	0.374535	0.217299
YCR098C	GIT1	transport; transmembrane transport; glycerol-3-phosphate transport; glycerophosphodiester transport	glycerol-3-phosphate transmembrane transporter activity; glycerophosphodiester transmembrane transporter activity; transmembrane transporter activity; transporter activity	membrane; integral to membrane; plasma membrane	2.73319		1.53059	1.96838		1.64951	0.415098	-0.58012	0.958951	0.805509	-0.781087	-0.0737409	0.452275	0.625678	-0.887074	0.633362	0.472361	0.93874	0.226074	-0.829631	0.0318521	-0.629475	0.580219	0.253921	0.448525	0.470553	-0.32737	-0.450908
YCR099C	YCR099C	biological_process	molecular_function	integral to membrane	-0.105974	-0.760345	1.33701	2.01217	-0.208521	0.383473	-0.279482	-0.154035	-0.0391111	-0.314495	-0.413478	-0.00314365	0.113498	0.0410806	-0.29602	0.0347559	0.0882431	-0.241851	0.0361472	0.11996	-0.451413	0.0117444	-0.727157	-0.644589	-0.44076	0.427166	-0.0110688	0.105843
YCR100C	YCR100C	biological_process	molecular_function	integral to membrane	-0.310648	-0.327768	0.586971	0.824671	-0.741151	0.111739	0.102746	-1.15986	-0.377402	-0.129451	0.185327	0.310799	0.408328	0.134793	-1.16413	0.126287	-0.0444264	-0.26477	-0.503322	0.597554	0.653227	-0.0955702	0.860576	-0.358946	-0.396328	0.485665	0.369913	0.0404184
YCR101C	YCR101C	biological_process	molecular_function	membrane; integral to membrane	0.15926	-1.06816	2.21359	2.87098	0.099278	0.202055	0.114043	-0.353737	-0.402699	0.292378	0.105706	0.186673	0.111632	0.700806	-0.207575	0.245047	1.31392	1.43094	0.830934	0.731479	0.554771	0.702201	1.82163	0.243801	-0.23607	1.03552	0.631621	0.158134
YCR102C	YCR102C	response to copper ion; oxidation-reduction process	molecular_function; zinc ion binding; oxidoreductase activity	cellular_component	0.452584	-0.0407416	1.16825	1.71626	-0.456817	0.103996	-0.575086	-1.08615	-0.53861	0.0842933	-0.172668	-0.0875772	-0.251741	0.0501288	0.435143	0.825399	-0.0132698	0.0415606		0.428883	0.263088	0.18076	-0.351125	0.750858	-0.680143	-1.17545	0.204325	-0.892514
YCR104W	PAU3	response to stress; biological_process	molecular_function	cellular_component; membrane; integral to membrane	0.0369265	-0.281602	1.22976	1.56004	0.371165	-0.110654	-0.0724345	-0.0742048	-0.0153375	-0.164692	0.10512	0.279132	0.245807	0.0773979	0.284965	0.328386	0.280047	0.433193	0.36562	0.455973	0.285117	-0.199565	0.224024	-0.161054	-2.03075e-05	-0.42593	-0.0568607	-0.0874943
YCR105W	ADH7	oxidation-reduction process; alcohol metabolic process	metal ion binding; oxidoreductase activity, acting on the CH-OH group of donors, NAD or NADP as acceptor; zinc ion binding; cofactor binding; alcohol dehydrogenase (NADP+) activity; oxidoreductase activity	cellular_component	-0.174845		0.841191	0.893928	-0.246558	0.262504	-1.20874	-0.0115603	-1.09495	0.519413	-0.223351	-0.489249	-0.313394	-1.80995	-0.381144	0.163328	0.722942	-1.1702	-0.557882	-0.302937		-0.314372	-0.164538	-0.0767477	-0.861736	1.21384	0.926383	-0.990488
YCR106W	RDS1	regulation of transcription from RNA polymerase II promoter; regulation of transcription, DNA-dependent; response to xenobiotic stimulus; transcription, DNA-dependent; transcription from RNA polymerase II promoter	sequence-specific DNA binding RNA polymerase II transcription factor activity; metal ion binding; DNA binding; sequence-specific DNA binding; zinc ion binding	nucleus	-0.043353	-0.642853	0.594941	0.752801	-0.177144	0.313003	0.105679	0.0565548	0.152831	0.0979826	0.0649174	-0.388312	0.0776531	0.425134	0.248961	-0.189718	0.0688154	0.04966	0.135074	-0.387045	-0.310301	0.689815	0.901167	0.410877	-0.241877	-1.26546	0.00153967	-0.0977371
YCR107W	AAD3	cellular aldehyde metabolic process; oxidation-reduction process	aryl-alcohol dehydrogenase (NAD+) activity; oxidoreductase activity	cellular_component	-0.260377		-1.23835	-0.23893	-1.2307	0.327301	0.111013	0.675077	0.110408	0.41976	0.0502894	-0.794643	0.405175	0.188409	-0.376605	0.508247	-1.0781	-0.791676	0.195632	0.334346	0.656256	0.237175	0.034653	0.190847	-0.31062	-0.137042	-0.449453	-0.551234
YDL001W	RMD1	sporulation resulting in formation of a cellular spore; meiosis; biological_process	molecular_function	cytoplasm	-0.123258	0.151495	-0.257782	-0.347807	0.242453	0.153701	0.0338893	0.195231	-0.138816	-0.0562847	-0.129339	-0.0741624	0.193659	0.00485268	0.0184243	-0.10173	-0.501605	-0.207819	-0.570232	-0.74885	-0.285758	0.0551561	-0.169944	-0.460613	-0.382447	-0.849045	-0.672603	-0.63657
YDL002C	NHP10	nucleosome mobilization; double-strand break repair; regulation of transcription, DNA-dependent; transcription, DNA-dependent	DNA binding; loop DNA binding; DNA end binding	nucleus; Ino80 complex	-0.157126	-0.0785853	0.277093	0.284885	-0.154941	0.0394386	-0.198885	0.235619	-0.132341	-0.307172	-0.0847295	-0.188114	-0.184134	0.0478837	0.0312649	-0.140955	-0.107655	-0.359169	-0.233673	-0.697845	-0.0957027	0.209898	0.118669	-0.0710771	-0.138002	0.205775	0.057945	-0.184133
YDL003W	MCD1	chromosome segregation; mitotic chromosome condensation; apoptotic process; mitosis; double-strand break repair; cell division; establishment of mitotic sister chromatid cohesion; cell cycle; response to DNA damage stimulus	chromatin binding	nuclear chromosome; nucleus; nuclear mitotic cohesin complex; condensed nuclear chromosome; mitochondrion; chromosome; chromosome, centromeric region	0.107616	1.66854	-2.26415	-2.7278	0.258428	-0.346372	-0.517932	-0.287802	-0.0228347	-0.157211	-0.0521244	0.181111	0.0880186	-0.343133	-0.670732	-0.343811	-0.450569	-0.125906	-0.0641972	-0.23454	0.140102	-0.389079	-0.980242	-0.343086	-0.526354	-0.747377	-1.0398	-0.873278
YDL004W	ATP16	transport; ATP biosynthetic process; ATP synthesis coupled proton transport; proton transport; ion transport	hydrolase activity; ATPase activity; proton-transporting ATP synthase activity, rotational mechanism; proton-transporting ATPase activity, rotational mechanism	membrane; proton-transporting ATP synthase complex, catalytic core F(1); mitochondrial inner membrane; integral to membrane; mitochondrion; mitochondrial proton-transporting ATP synthase, central stalk	-0.21633	-1.47215	1.96566	1.96861	0.103021	-0.121166	-0.00160019	0.142257	-0.0414107	0.0788854	-0.0637376	-0.0275782	-0.646304	-0.224283	-0.466258	-0.297236	-0.215582	-0.0635468	0.0834311	-0.323986	-0.452762	-0.240049	-0.221657	-0.0393452	-0.0511267	0.107448	0.327693	0.142
YDL005C	MED2	negative regulation of transcription from RNA polymerase II promoter; regulation of transcription, DNA-dependent; positive regulation of transcription from RNA polymerase II promoter; transcription, DNA-dependent; RNA polymerase II transcriptional preinitiation complex assembly	RNA polymerase II repressing transcription factor binding; RNA polymerase II transcription factor recruiting transcription factor activity	core mediator complex; nucleus; cytosol	-0.0822882	0.0508136	-0.202587	0.0160381	0.0168499	-0.139445	-0.0108584	-0.00856789	0.32224	0.0419334	0.146002	0.0198864	-0.0267	-0.0344406	0.109043	-0.211658	0.100412	0.00166531	0.115509	-0.00898461	0.00325287	-0.00517689	-0.455459	-0.0871676	-0.0620961	-0.546062	-0.130395	-0.128078
YDL006W	PTC1	mitochondrion inheritance; tRNA splicing, via endonucleolytic cleavage and ligation; response to stress; protein dephosphorylation; inactivation of MAPK activity involved in osmosensory signaling pathway; pheromone-dependent signal transduction involved in conjugation with cellular fusion	metal ion binding; hydrolase activity; phosphoprotein phosphatase activity; catalytic activity; protein serine/threonine phosphatase activity	nucleus; cytoplasm	-0.0189937	-0.105763	0.0456896	0.00736761	0.445583	-0.1226	0.348238	0.217071	-0.0503891	0.0269983	0.0726168	-0.06854	-0.143172	0.309669	-0.106893	0.28251	0.14786	-0.120599	0.220848	-0.636534	0.102648	0.116963	0.184799	-0.132838	-0.308085	0.169295	0.00845062	-0.155772
YDL007W	RPT2	proteasome regulatory particle assembly; ubiquitin-dependent protein catabolic process; positive regulation of protein catabolic process; peptide catabolic process; protein catabolic process	hydrolase activity; ATP binding; nucleotide binding; nucleoside-triphosphatase activity; ATPase activity	nucleus; proteasome complex; cytoplasm; proteasome regulatory particle, base subcomplex	-0.0586981	0.373737	-0.458072	-0.702525	0.329969	-0.171577	0.0823185	0.0457702	0.0344538	0.56721	0.164908	0.404902	-0.170748	0.0363464	0.304312	-0.0791987	0.183255	0.208351	0.239819	0.0201914	0.137733	0.120709	0.101551	0.22093	0.348812	0.3649	0.290278	0.0152829
YDL008W	APC11	cell division; anaphase-promoting complex-dependent proteasomal ubiquitin-dependent protein catabolic process; protein ubiquitination; cell cycle; mitosis	metal ion binding; zinc ion binding; ligase activity; ubiquitin-protein ligase activity	anaphase-promoting complex	-0.0486773	-0.0521183	0.0449449	0.35329	0.317434	0.0789127	0.159006	0.163628	-0.15351	0.1396	-0.286067	0.158004	0.0208212	0.216876	-0.0273952	-0.380287	-0.0188832	-0.0285086	-0.0120204	-0.43705	0.0214371	0.0839109	0.568819	0.414954	0.171597	0.193097	0.442741	-0.0851624
YDL010W	GRX6	cellular response to oxidative stress; cell redox homeostasis	electron carrier activity; protein disulfide oxidoreductase activity; metal ion binding; 2 iron, 2 sulfur cluster binding; iron ion binding; protein homodimerization activity; iron-sulfur cluster binding; glutathione-disulfide reductase activity	fungal-type vacuole; Golgi apparatus; integral to membrane; endoplasmic reticulum membrane; cis-Golgi network; Golgi lumen; vacuole	0.173904	-0.0613106	0.173277	0.977579	0.202648	-0.335237	0.0312356	0.268199	0.189961	0.298842	0.204802	0.71061	-0.081648	0.0266176	0.225167	0.476349	0.81909	0.360177	0.511415	0.313417	0.0555953	-0.0127051	0.203255	0.0927285	-0.123138	0.566223	0.293983	0.208944
YDL012C	YDL012C	biological_process	molecular_function	membrane; plasma membrane	0.15662	0.361989	-0.235624	0.182164	-0.0707859	-0.185148	-0.232114	-0.153657	-0.051286	-0.326349	-0.266052	-0.321404	-0.170495	0.0355436	-0.0764518	-0.0581715	-0.277544	-0.321957	-0.178635	-0.196776	-0.232562	-0.0490812	-0.0588724	0.109353	-0.294398	-0.205186	-0.417112	-0.304955
YDL013W	SLX5	protein sumoylation; DNA repair; regulation of transcription, DNA-dependent; protein ubiquitination; transcription, DNA-dependent; response to DNA damage stimulus; telomere maintenance	zinc ion binding; SUMO binding; ligase activity; ubiquitin-protein ligase activity	nucleus; nucleolus; ubiquitin ligase complex	0.00476205	-0.228858	0.162085	-0.0799121	0.391257	0.255229	0.0398498	-0.100658	-0.215033	-0.0975374	-0.142603	0.0589756	0.0794694	0.028062	0.251895	-0.0616243	-0.0521878	-0.0912539	0.0491841	-0.322171	0.236405	0.165183	0.209219	0.168937	0.0137254	0.0520843	-0.00751744	-0.213989
YDL014W	NOP1	rRNA methylation; ribosome biogenesis; box C/D snoRNA 3'-end processing; snoRNA processing; rRNA processing; methylation; tRNA processing	RNA binding; methyltransferase activity; rRNA methyltransferase activity; transferase activity	ribosome; 90S preribosome; nucleus; nucleolus; small-subunit processome; ribonucleoprotein complex; box C/D snoRNP complex	-0.130376	0.962472	-2.6155	-3.54613	0.130629	0.584659	0.449572	0.227567	-0.10893	-0.223025	-0.0851648	-0.671831	0.394879	0.152922	-0.00303292	-0.00870171	-0.479036	-0.376211	-0.638688	-0.508025	0.416172	0.279611	-0.0876069	0.0392494	-0.018598	-0.652154	-0.940169	-0.742784
YDL015C	TSC13	very long-chain fatty acid metabolic process; oxidation-reduction process; lipid metabolic process	oxidoreductase activity, acting on the CH-CH group of donors; oxidoreductase activity	membrane; endoplasmic reticulum; integral to membrane; mitochondrion; endoplasmic reticulum membrane; cytoplasm	-0.0729289	0.169968	-0.438219	-0.398599	0.160786	-0.0641777	0.236708	0.323855	-0.21654	0.0119121	-0.0109655	0.0321008	0.00832573	0.0251847	-0.116567	0.231378	0.0378314	-0.219534	-0.0397384	-0.528	0.606882	0.245611	0.421712	0.261998	-0.287149	0.257052	0.280931	0.523544
YDL017W	CDC7	phosphorylation; double-strand break repair via break-induced replication; negative regulation of exit from mitosis; DNA replication initiation; protein phosphorylation; mitosis; regulation of chromatin silencing at telomere; meiosis; cell division; cell cycle	metal ion binding; ATP binding; protein serine/threonine kinase activity; nucleotide binding; protein kinase activity; kinase activity; transferase activity; transferase activity, transferring phosphorus-containing groups	nucleus; Dbf4-dependent protein kinase complex	-0.210939	-0.596285	0.455966	0.826362	0.368966	0.0694876	0.177061	0.186373	0.114039	0.235068	0.293871	-0.0302967	0.0554169	-0.281558	-0.635983	-0.385652	-0.263014	-0.705927	-0.362697	-0.812549	-0.243567	-0.266595	-0.454369	-0.52185	-0.157976	-2.00566	-0.815192	-0.739277
YDL018C	ERP3	transport; protein transport; vesicle-mediated transport	molecular_function	membrane; endoplasmic reticulum; integral to membrane; endoplasmic reticulum membrane	-0.288845	-0.41556	0.397652	0.492464	0.102489	-0.472423	-0.407288	-0.38568	-0.25961	-0.0513791	-0.00207092	0.532032	-0.326264	-0.175378	-0.126453	0.192132	0.600938	0.316491	0.393197	0.0550506	-0.119641	-0.0372117	0.02787	-0.0996452	-0.172444	0.507039	0.509764	0.110053
YDL019C	OSH2	transport; sterol transport; lipid transport; endocytosis; exocytosis; maintenance of cell polarity	lipid binding; sterol transporter activity; 1-phosphatidylinositol binding; oxysterol binding; phospholipid binding	membrane; endoplasmic reticulum; cortical endoplasmic reticulum; plasma membrane; cellular bud neck	-0.205197	-0.463119	0.42486	0.502835	0.204417	-0.355968	-0.236928	-0.180482	-0.391791	0.09398	-0.100069	0.356939	-0.14965	0.165747	0.206484	0.464315	0.561838	0.898041	1.05281	1.02957	0.0291847	0.00822396	0.688276	1.80993	2.56281	3.68521	3.18518	2.8713
YDL020C	RPN4	regulation of transcription, DNA-dependent; positive regulation of transcription from RNA polymerase II promoter in response to arsenic-containing substance; transcription, DNA-dependent; positive regulation of transcription from RNA polymerase II promoter in response to stress; positive regulation of proteasomal ubiquitin-dependent protein catabolic process; negative regulation of transcription …	metal ion binding; DNA binding; RNA polymerase II core promoter proximal region sequence-specific DNA binding; sequence-specific DNA binding; RNA polymerase II core promoter proximal region sequence-specific DNA binding transcription factor activity involved in positive regulation of transcription	nucleus; cytoplasm	-0.259308	-0.497472	0.439315	0.539326	0.354861	-0.236189	0.296315	0.14491	0.287614	0.35071	0.240491	0.502441	-0.102877	0.430095	-0.130518	-0.16001	-0.119229	0.060621	0.0146273	-0.495624	-0.207547	-0.138718	-0.184826	-0.418464	-0.291305	0.319752	-0.118162	-0.116021
YDL021W	GPM2	metabolic process; glycolysis; biological_process	molecular_function; phosphoglycerate mutase activity; isomerase activity; catalytic activity; intramolecular transferase activity, phosphotransferases	cytoplasm	-0.271468	-2.37007	3.40495	3.59982	-0.551901	-0.948204	-0.695985	-0.197845	-0.86661	-0.0503244	-0.124046	1.19208	-0.169006	-1.29758	-0.055502	0.194985	0.14466	0.057696	1.31142	2.32077	-0.678386	-0.149257	-0.0287674	0.767566	0.844417	1.10179	2.04682	3.19426
YDL022W	GPD1	intracellular accumulation of glycerol; glycerol-3-phosphate metabolic process; glycerol-3-phosphate catabolic process; carbohydrate metabolic process; response to stress; NADH oxidation; oxidation-reduction process	oxidoreductase activity, acting on the CH-OH group of donors, NAD or NADP as acceptor; NAD binding; glycerol-3-phosphate dehydrogenase [NAD+] activity; protein homodimerization activity; coenzyme binding; oxidoreductase activity	nucleus; glycerol-3-phosphate dehydrogenase complex; cytosol; peroxisome; cytoplasm	0.290564	-0.404819	0.433701	0.153673	0.0460327	-0.187264	0.014322	0.504689	0.594196	0.572257	0.52875	1.12124	0.220236	0.504754	1.03658	1.02101	1.35003	2.14543	2.36017	2.34604	0.170898	0.191173	1.58329	2.54073	2.99388	2.93461	2.60357	2.68068
YDL023C	YDL023C				-0.0253184	0.119715	-1.24563	0.0670234	2.70926	-0.0799328	0.106227	2.24518		0.634713		1.62826	0.585124	0.858928	0.740769	0.694421	0.908109		2.39701	1.80789		-0.218203	2.20356	2.64398	2.68382	1.00472	3.0437	2.20886
YDL024C	DIA3	invasive growth in response to glucose limitation; pseudohyphal growth; dephosphorylation	hydrolase activity; acid phosphatase activity; phosphatase activity	fungal-type cell wall	-0.0152559	-1.05088	2.25631	3.07213	0.139367	-0.0656372	1.01627	0.325817	0.205847	-0.0366615	0.509863	0.53292	-0.23565	-0.63897	0.258038	0.482031	-0.570401	1.11755	0.0779035	0.485931	-0.347676	0.623524	0.178016	1.05536	0.110514	0.303301	0.588373	1.6244
YDL025C	RTK1	phosphorylation; protein phosphorylation; biological_process	ATP binding; protein serine/threonine kinase activity; protein kinase activity; kinase activity; nucleotide binding; transferase activity; transferase activity, transferring phosphorus-containing groups	cellular_component	-0.174907	-1.0955	1.51272	1.99739	-0.270059	-0.515455	0.256771	0.270921	0.117478	-0.130599	0.0505947	0.140773	-0.2258	0.02415	0.305053	0.493304	0.645693	0.646733	0.602283	0.700069	-0.0985293	-0.327467	0.564073	0.131526	0.308028	0.651022	0.823247	0.648086
YDL027C	YDL027C	biological_process	molecular_function	membrane; integral to membrane; mitochondrion	-0.126787	-0.938031	1.22103	1.50205	0.103818	-0.020258	0.149429	0.495113	0.44802	-0.0362774	0.194632	0.688665	0.0255021	0.559258	0.392049	0.363928	0.528223	0.365345	0.662376	0.736043	-0.0593484	0.202206	0.635843	0.39301	0.361506	1.03864	0.833941	1.04737
YDL028C	MPS1	phosphorylation; spindle assembly; regulation of attachment of spindle microtubules to kinetochore; protein phosphorylation; mitotic spindle assembly checkpoint; spindle pole body duplication associated with nuclear envelope; sister chromatid biorientation	protein serine/threonine/tyrosine kinase activity; ATP binding; protein serine/threonine kinase activity; protein kinase activity; kinase activity; nucleotide binding; transferase activity; transferase activity, transferring phosphorus-containing groups	condensed nuclear chromosome kinetochore; spindle pole body	-0.118205	-0.279863	-0.104437	-0.198864	-0.0564186	0.110031	-0.146376	-0.174954	-0.311322	-0.221575	-0.222861	-0.259407	-0.100795	-0.157511	-0.202381	-0.177243	-0.424529	-0.32026	-0.473729	-0.0803546	0.0414571	0.114644	-0.190044	0.0145967	-0.148052	-0.0616394	-0.338321	-0.204703
YDL029W	ARP2	ascospore wall assembly; regulation of actin filament polymerization; CVT pathway; Arp2/3 complex-mediated actin nucleation; establishment of mitochondrion localization; actin filament organization; mitochondrion inheritance; ATP catabolic process	actin binding; ATP binding; nucleotide binding; ATPase activity	cytoskeleton; actin cortical patch; Arp2/3 protein complex; mitochondrion; cytoplasm	-0.0353282	-0.520935	0.227627	0.218613	0.25781	-0.309844	-0.0880061	0.129801	0.386492	0.207194	0.223553	0.424021	-0.19845	-0.0567188	-0.00628563	-0.0619923	-0.0632193	0.209643	0.139803	-0.0152963	-0.20956	-0.18777	-0.408779	-0.0927955	0.0417692	0.0432331	-0.0401599	-0.0103341
YDL030W	PRP9	mRNA processing; mRNA splicing, via spliceosome; RNA splicing	metal ion binding; RNA binding; zinc ion binding; nucleic acid binding	nucleus; U2-type prespliceosome; spliceosomal complex	0.265135	0.823194	-0.981905	-0.696006	-0.0876006	0.347986	0.0541668	-0.49853	-0.0626972	-0.0132249	-0.210424	-0.157077	0.0751682	0.0242153	-0.102248	-0.254686	-0.350618	-0.422	-0.576132	-0.630386	0.244875	0.0563061	-0.396184	-0.225126	-0.228284	-0.254738	-0.499211	-0.468315
YDL031W	DBP10	ribosome biogenesis; maturation of 5.8S rRNA from tricistronic rRNA transcript (SSU-rRNA, 5.8S rRNA, LSU-rRNA); maturation of LSU-rRNA from tricistronic rRNA transcript (SSU-rRNA, 5.8S rRNA, LSU-rRNA); rRNA processing	RNA binding; ATP binding; helicase activity; nucleic acid binding; ATP-dependent helicase activity; ATP-dependent RNA helicase activity; hydrolase activity; nucleotide binding; hydrolase activity, acting on acid anhydrides, in phosphorus-containing anhydrides	nucleus; nucleolus; preribosome, large subunit precursor	-0.320732	1.38331	-2.22666	-2.86885	0.24062	0.401779	0.316632	-0.0692484	-0.364395	-0.125834	-0.479758	-0.968532	-0.205768	0.0897068	-0.496766	-0.683794	-0.649313	-0.880569	-0.925398	-1.72682	0.374987	0.227806	0.0758967	-0.0461949	-0.0993849	-0.753542	-1.12463	-0.850007
YDL033C	SLM3	mitochondrial tRNA thio-modification; tRNA processing	RNA binding; ATP binding; tRNA (5-methylaminomethyl-2-thiouridylate)-methyltransferase activity; nucleotide binding; sulfurtransferase activity; tRNA binding; transferase activity	mitochondrion; cytoplasm	0.227682	0.590019	-0.216485	-0.0849411	-0.076778	0.313858	0.0502659	-0.312621	0.00116167	-0.445925	-0.35298	0.02386	0.0174714	0.0832344	0.140757	0.0756133	0.139953	-0.306793	-0.436088	0.393318	0.00572071	-0.0390364	-0.347338	-0.106295	-0.186534	-0.192642	-0.642568	-0.375623
YDL035C	GPR1	G-protein coupled receptor signaling pathway; glucose mediated signaling pathway; pseudohyphal growth; signal transduction; sucrose mediated signaling; invasive growth in response to glucose limitation; detection of glucose; replicative cell aging; detection of sucrose stimulus; hexose mediated signaling	signal transducer activity; glucose binding; G-protein coupled receptor activity	membrane; integral to membrane; plasma membrane	0.060727	0.197938	-0.164594	0.150135	-0.631918	-0.113636	0.0621707	-0.00458493	0.101355	-0.0206705	0.0592348	0.250776	0.184996	-0.0509457	-0.0715373	0.223009	0.306439	0.193359	0.262228	0.364386	0.241125	0.0411202	-0.0270231	-0.0436114	-0.25603	0.916074	0.425153	0.843742
YDL036C	PUS9	tRNA pseudouridine synthesis; RNA modification; pseudouridine synthesis; tRNA processing	RNA binding; isomerase activity; pseudouridine synthase activity	nucleus; mitochondrion; cytoplasm	-0.0370615	0.0973188	-0.308017	-0.267312	0.180207	0.614729	0.0888802	-0.0153652	0.0245661	0.183232	-0.110401	-0.292616	-0.170941	-0.0287958	-0.215945	-0.233753	-0.0972987	-0.420098	-0.796726	-0.850247	-0.0296787	-0.126117	-0.206258	-0.465123	-0.785214	-0.615113	-0.847841	-0.995119
YDL039C	PRM7	conjugation with cellular fusion	molecular_function	integral to membrane	0.483385	-1.22087	0.586181	1.15241	0.260146	4.4463	2.1639	1.3525	0.288336	0.981789	0.869662	-0.545292	0.161062	0.129558	-1.07809	-1.89345	-3.73417	-3.37642	-3.06263	-3.27704	0.214397	1.25809	0.0677471	-1.18255	-1.85363	-2.66939	-2.58646	-3.52356
YDL039C	PRM7	conjugation with cellular fusion	molecular_function	integral to membrane	0.85169		1.28273	1.6292	0.46138	4.64348	2.94616	1.05358	0.581153	0.107753	-0.335385	-1.36979	0.493222	-0.0688831	-1.03748	-2.1786	-3.31236	-3.51431	-3.57684	-2.96954	0.17843	1.46853	-0.0336613	-1.49578	-1.24864		-3.43767	-2.98485
YDL040C	NAT1	N-terminal protein amino acid acetylation	peptide alpha-N-acetyltransferase activity	NatA complex; mitochondrion; cytoplasm; cytosolic ribosome	-0.334486	0.217942	-1.04637	-0.904117	-0.261896	-0.0562089	0.0696326	-0.0781554	0.149693	-0.09679	-0.0581779	-0.210217	0.0357028	-0.369427	-0.267562	-0.337126	-0.342762	-0.40089	-0.424112	-0.186577	-0.15435	-0.23807	-0.674023	-0.578371	-0.184421	-0.588333	-0.786596	-0.509584
YDL042C	SIR2	chromatin silencing at silent mating-type cassette; chromatin assembly or disassembly; chromatin silencing; DNA repair; regulation of transcription, DNA-dependent; transcription, DNA-dependent; chromatin silencing at telomere; negative regulation of DNA recombination; replicative cell aging; chromatin silencing at rDNA; double-strand break repair via nonhomologous end joining; response to DNA dam…	NAD-dependent histone deacetylase activity (H3-K14 specific); NAD binding; NAD-dependent histone deacetylase activity; NAD-dependent histone deacetylase activity (H4-K16 specific); nucleosome binding; metal ion binding; hydrolase activity; NAD+ binding; NAD-dependent histone deacetylase activity (H3-K9 specific); zinc ion binding; hydrolase activity, acting on carbon-nitrogen (but not peptide) bo…	RENT complex; nuclear telomeric heterochromatin; nucleus; nucleolus; nuclear telomere cap complex; chromatin silencing complex; nuclear heterochromatin	0.0766112	1.20808	-0.949285	-0.703078	-0.114393	0.51642	0.0400389	0.124165	0.0250116	-0.210592	0.10848	-0.243069	0.51876	-0.130579	-0.0412326	-0.411519	-0.500343	-0.368123	-0.614124	-0.0673014	0.114604	0.135057	-0.32356	-0.207062	-0.347438	-0.728795	-0.881759	-0.304283
YDL043C	PRP11	mRNA processing; RNA splicing; spliceosomal complex assembly	metal ion binding; RNA binding; zinc ion binding; nucleic acid binding	nucleus; U2-type prespliceosome; spliceosomal complex	-0.207397	-0.122297	-0.493109	-0.891728	-0.16881	0.112813	-0.0769686	-0.105036	-0.0210681	0.217408	0.158809	-0.283854	-0.256872	-0.108055	-0.756309	0.00252022	-0.211745	-0.788656	-0.61008	-0.84796	-0.135299	-0.544519	-0.324131	-0.489644	-0.116706	-0.791558	-0.713723	-0.305418
YDL044C	MTF2	mRNA processing; cytoplasmic translation	RNA binding	mitochondrial matrix; mitochondrion	0.0390252	-0.149429	0.589968	-0.00350077	0.391281	-0.0411663	0.161754	-0.153998	-0.141981	0.0806428	-0.0933155	0.1901	-0.060196	0.129734	0.0519792	0.296642	-0.0110027	0.131024	0.00993521	0.116414	-0.24616	-0.199616	-0.190169	-0.26229	-0.192313	-0.0548911	-0.116615	-0.447928
YDL045C	FAD1	FAD biosynthetic process; metabolic process	FMN adenylyltransferase activity; ATP binding; nucleotide binding; nucleotidyltransferase activity; transferase activity; catalytic activity	cytoplasm	0.256073	-0.138447	1.06207	0.918323	0.273575	0.0393543	0.257919	0.372762	0.218398	0.464311	0.187849	0.485423	0.0743297	0.328788	0.512277	0.523199	0.54481	0.54924	0.49934	0.15125	0.121014	0.2965	0.373798	0.471785	0.252205	0.523398	0.640191	0.103815
YDL045W-A	MRP10	mitochondrial translation; mitochondrial respiratory chain complex assembly	structural constituent of ribosome	ribosome; ribonucleoprotein complex; mitochondrial small ribosomal subunit; mitochondrion	0.242136	0.912104	-0.388685	-0.504068	0.00674705	0.0279242	-0.320588	-0.0907586	-0.179273	0.0965992	0.0450443	-0.104178	0.0633614	0.266456	0.61521	-0.562677	-0.341022	0.0736331	0.33965	0.475254	0.561124	0.783126	0.474504	0.862007	0.674487	0.854854	0.981664	0.654556
YDL046W	NPC2	transport; lipid transport; intracellular sterol transport	molecular_function	fungal-type vacuole; fungal-type vacuole lumen; vacuole	0.472289	-0.340483	1.00678	1.41267	0.170927	0.306589	0.301379	0.130236	0.393554	0.535253	0.383841	0.52554	0.509983	0.210985	0.458924	0.713983	0.691052	0.550038	0.561567	1.32564	0.122598	0.215322	0.257883	0.582898	0.473378	1.52418	1.12211	0.97171
YDL047W	SIT4	tRNA wobble uridine modification; TOR signaling cascade; DNA repair; actin cytoskeleton organization; fungal-type cell wall organization; mitosis; intracellular protein kinase cascade; replicative cell aging; cellular response to oxidative stress; cell division; G1/S transition of mitotic cell cycle; dephosphorylation; cell cycle	metal ion binding; hydrolase activity; phosphoprotein phosphatase activity; protein serine/threonine phosphatase activity	nucleus; cytoplasm	-0.105138	-0.171229	0.0158079	0.281354	0.200201	0.583676	0.0217836	-0.0100976	0.0580402	0.105287	0.14874	-0.0274712	0.0453205	-0.145039	-0.335685	-0.195412	-0.364874	-0.383335	-0.199696	-0.238525	0.365637	0.0839263	0.274596	0.155395	0.0473827	-0.0537041	-0.147345	0.120389
YDL048C	STP4	biological_process	metal ion binding; sequence-specific DNA binding; nucleic acid binding	nucleus; mitochondrion; cytoplasm	0.011022	-0.824439	0.35128	-0.0786633	-0.290934	-0.355745	-1.63688	-0.954193	-0.331933	-0.0533228	-0.577337	-0.883568	0.0866315	-1.4467	-1.22339	-1.07506	-1.09669	-0.56182	-1.01108	0.316467	-0.228673	-1.272	-1.19083	-1.04808	-1.06127	-0.218682	-0.598564	-0.0303529
YDL049C	KNH1	cell wall biogenesis; (1->6)-beta-D-glucan biosynthetic process	molecular_function	fungal-type cell wall; cell wall; extracellular region	0.280552	-0.084583	0.481466	0.707322	0.216698	-0.095889	0.474597	0.306493	0.279785	0.375416	0.125784	0.0907112	0.0129832	0.803444	0.492557	0.221851	0.420771	0.24307	0.243491	-0.372534	0.0236087	0.324631	0.420884	-0.427626	-0.776267	-0.602263	-0.860626	-1.09547
YDL050C	YDL050C				0.982741	0.192904	-1.18063	-1.70918	0.429292	1.37667	0.152037	0.676005	0.304647	0.145368	0.361492	-0.310061	-0.194605	0.203888	-0.0293954	-0.239443	0.165572	-0.253418	-0.0700652	-1.83515	0.660678	1.0925	0.147581	0.457766	0.0548413	0.599411	-0.558311	-0.266086
YDL051W	LHP1	RNA processing; tRNA processing	RNA binding; nucleotide binding; tRNA binding; nucleic acid binding	nucleoplasm; nucleus; nucleolus; ribonucleoprotein complex	-0.134962	0.669162	-1.23306	-1.88651	0.274775	0.417661	0.319935	0.291937	0.277613	-0.0120785	-0.0172603	-0.583706	0.115278	0.378018	0.0986811	0.157541	-0.0525229	-0.405056	-0.603455	-1.22575	0.0144333	0.215059	-0.24697	-0.256627	-0.45178	-0.434796	-0.722625	-1.06976
YDL052C	SLC1	phospholipid biosynthetic process; metabolic process; CDP-diacylglycerol biosynthetic process; lipid metabolic process; glycerophospholipid biosynthetic process	transferase activity, transferring acyl groups; transferase activity; 1-acylglycerol-3-phosphate O-acyltransferase activity	membrane; lipid particle; integral to membrane	-0.0131517	0.31205	-0.400288	-0.357835	0.0963386	-0.349168	-0.0180525	0.207238	0.169928	0.1785	0.159807	0.267326	-0.155363	0.30552	-0.0236004	0.105712	0.29336	0.09534	0.212407	-0.123633	-0.039988	0.0769624	0.172484	0.125928	-0.148744	0.268902	0.264961	0.213369
YDL053C	PBP4	biological_process	molecular_function	cytoplasmic stress granule; nucleus; cytoplasm	-0.0717365	-0.918155	1.0673	1.04028	-0.00655307	-0.0437797	0.15288	0.0421344	0.133742	0.363434	0.048284	0.201085	0.0438408	0.0328255	0.242168	-0.572366	0.0988492	0.141601	0.0494761	-0.255182	-0.509031	-0.435974	-0.343406	-0.53588	-0.248584	-0.689788	-0.0502574	-0.574312
YDL054C	MCH1	transport; transmembrane transport	monocarboxylic acid transmembrane transporter activity; transporter activity	membrane; vacuolar membrane; fungal-type vacuole membrane; integral to membrane; vacuole	-0.0809453	-0.623363	0.482116	0.68141	0.137682	-0.139001	0.474412	0.403612	0.658291	0.443234	0.481443	0.184145	0.0920428	0.00379152	0.308393	0.498044	0.493076	0.40843	0.191722	-0.060032	-0.167882	-0.192913	-0.253409	-0.31872	-0.710758	-0.277472	-0.403692	-0.681405
YDL055C	PSA1	cell wall mannoprotein biosynthetic process; protein glycosylation; biosynthetic process; cell cycle; GDP-mannose biosynthetic process	mannose-1-phosphate guanylyltransferase activity; nucleotide binding; nucleotidyltransferase activity; GTP binding; transferase activity	cytoplasm	0.254205	0.0738778	-0.203321	-0.512684	0.419482	0.0648562	0.0980015	0.101255	0.224404	0.115769	0.210143	0.462752	0.446261	0.334913	-0.0890346	0.0352194	-0.134782	0.108287	-0.0541245	0.343782	0.447096	0.110782	-0.215907	0.0474536	-0.199474	-0.329696	-0.454467	-0.204203
YDL056W	MBP1	positive regulation of transcription involved in G1/S phase of mitotic cell cycle; regulation of transcription, DNA-dependent; transcription, DNA-dependent	DNA binding; sequence-specific DNA binding; RNA polymerase II core promoter proximal region sequence-specific DNA binding transcription factor activity involved in positive regulation of transcription; sequence-specific DNA binding transcription factor activity	nucleus; MBF transcription complex	-0.00455737	0.0608136	0.0349832	0.260524	0.0567659	0.399877	0.157848	0.452402	0.135059	-0.158152	0.0292371	-0.142181	-0.129684	0.00395737	-0.250158	-0.221852	-0.456049	-0.351684	-0.166002	-0.365902	-0.264012	-0.404062	0.0307928	-0.177358	-0.107689	-0.343843	-0.425269	-0.363461
YDL057W	YDL057W	biological_process	molecular_function	cellular_component	-0.197658	-1.32867	1.61961	1.54792	0.0511975	-0.600692	-0.0325557	0.107678	0.0876363	0.141968	0.0471952	0.16987	-0.0506108	-0.25616	-0.133948	0.249494	-0.0627435	0.152956	0.262541	-0.0211415	0.127352	-0.0844749	0.249765	0.532691	0.204703	-0.154679	0.446783	0.603283
YDL058W	USO1	transport; SNARE complex assembly; Golgi vesicle docking; intracellular protein transport; Golgi vesicle transport; vesicle fusion with Golgi apparatus; ER to Golgi vesicle-mediated transport; protein transport	molecular_function; protein transporter activity	cytoskeleton; membrane; endoplasmic reticulum; cytoplasmic vesicle; cytoplasm; Golgi membrane; Golgi apparatus; integral to membrane; endoplasmic reticulum membrane; ER to Golgi transport vesicle membrane; cytoplasmic vesicle membrane	-0.400853	0.484403	-1.80592	-1.14631	-0.0314274	-0.341241	-0.110532	-0.244568	0.196432	-0.0164033	0.0254102	0.0119535	-0.240372	-0.378927	-0.462516	-0.542076	-0.628328	-0.420034	-0.042958	-0.63161	-0.268031	-0.345798	-0.529442	-0.223801	-0.0514425	-0.502887	-0.552948	-0.550858
YDL059C	RAD59	telomere maintenance via recombination; double-strand break repair via single-strand annealing; DNA repair; DNA strand renaturation; response to DNA damage stimulus; DNA recombination	protein binding	nucleus; cytoplasm	0.395212	-0.313465	0.738641	0.652621	0.312065	0.137977	-0.108336	-0.0323627	-0.404375	0.158021	0.277409	0.25376	-0.00512951	0.278202	0.445918	0.444633	0.329582	0.273428	0.303829	-0.0125176	0.104164	-0.0877104	0.117957	-0.145828	0.0166097	0.181111	0.361333	-0.194927
YDL060W	TSR1	ribosome biogenesis; rRNA processing	ribonucleoprotein complex binding	nucleus; 90S preribosome; nucleolus; cytoplasm	-0.0405518	0.897622	-2.02033	-3.29398	0.0427956	0.79941	0.287531	-0.210861	-0.0243522	-0.0702383	0.103252	-0.878079	0.161415	0.201083	-0.34854	-0.520603	-0.678268	-0.669183	-0.990458	-1.17363	0.432332	0.374955	-0.127969	-0.250373	-0.336241	-0.913899	-1.18488	-0.965952
YDL061C	RPS29B	cytoplasmic translation; translation	metal ion binding; structural constituent of ribosome	ribosome; ribonucleoprotein complex; intracellular; cytosolic small ribosomal subunit; cytoplasm	0.180005	0.4369	-0.885259	-1.55534	0.208237	0.0541712	-0.0334638	0.0304819	-0.183972	-0.0893333	-0.1325	-0.0268305	0.167054	0.179295	0.119309	-0.196373	0.360815	-0.0107468	0.0863765	-0.288136	0.174825	0.233916	0.165746	0.444749	0.275346	0.204915	0.164625	-0.173919
YDL063C	SYO1	transport; ribosome biogenesis; ribosomal large subunit biogenesis; protein transport	molecular_function	nucleus; cytoplasm	-0.0774734	1.07519	-2.33718	-3.24378	0.0831043	0.793833	0.0861805	-0.553378	-0.526161	-0.669917	-0.452629	-1.52892	-0.348807	-0.202709	-0.712022	-0.633888	-1.10387	-1.30583	-1.69919	-2.46567	-0.349926	0.0904033	-0.727277	-0.846469	-1.02709	-1.56345	-1.65858	-1.74407
YDL064W	UBC9	protein sumoylation; mitotic spindle elongation; cell division; cell cycle; mitosis	ATP binding; nucleotide binding; acid-amino acid ligase activity; SUMO ligase activity; ligase activity	nucleus; condensed nuclear chromosome	0.10365	0.442445	-0.320691	-0.179106	-0.172253	-0.144164	0.0766903	-0.128548	0.0124218	0.0171425	0.10491	0.0414165	0.0499186	0.127401	0.111632	-0.0222927	0.233562	-0.122198	-0.0082106	-0.140048	0.135431	0.0969203	-0.0497632	0.0893665	0.0888655	0.0787351	0.180844	-0.173263
YDL065C	PEX19	peroxisome organization; peroxisome inheritance; ER-dependent peroxisome organization; protein exit from endoplasmic reticulum; protein import into peroxisome membrane; protein stabilization	protein binding; peroxisome membrane targeting sequence binding	membrane; endoplasmic reticulum; cytosol; endoplasmic reticulum membrane; peroxisome; cytoplasm; peroxisomal membrane	0.112814	-0.220853	0.692672	0.799995	0.247133	-0.330159	-0.0907547	-0.127006	0.13755	0.0106685	-0.0232865	0.301732	-0.130101	-0.0632719	0.0127948	-0.0443341	-0.147343	0.0857269	0.0408745	0.381739	-0.383982	-0.110618	-0.186747	0.0172587	-0.210027	-0.0213192	0.147523	0.0398762
YDL066W	IDP1	tricarboxylic acid cycle; glyoxylate cycle; isocitrate metabolic process; glutamate biosynthetic process; oxidation-reduction process	magnesium ion binding; isocitrate dehydrogenase (NADP+) activity; metal ion binding; oxidoreductase activity, acting on the CH-OH group of donors, NAD or NADP as acceptor; NAD binding; oxidoreductase activity	mitochondrial nucleoid; mitochondrion	0.0381874	-0.0934117	-0.147074	0.0525979	-0.208254	0.183908	-0.140064	0.0412148	0.412095	0.220917	0.196829	0.122765	-0.0331037	0.201536	0.31515	0.283438	0.37273	0.210481	0.0830575	0.682952	0.106305	0.241326	-0.3651	-0.0937386	0.0488455	0.0458403	-0.304973	0.0780841
YDL067C	COX9	respiratory electron transport chain; mitochondrial electron transport, cytochrome c to oxygen; oxidation-reduction process	cytochrome-c oxidase activity; oxidoreductase activity	membrane; mitochondrial inner membrane; integral to membrane; mitochondrion; mitochondrial respiratory chain complex IV; mitochondrial respiratory chain	0.0698561	-0.775391	1.4827	1.4241	0.097309	-0.160272	-0.0539227	-0.141511	-0.24284	-0.0789047	-0.228875	0.0305218	-0.106873	0.205656	0.199326	0.0533422	0.341861	0.0240011	0.241326	0.150588	-0.387158	0.136454	0.423264	0.114735	-0.164758	0.568504	0.720625	0.344584
YDL068W	YDL068W				-0.103883	0.319997	1.21469	0.404044	0.19253	1.60965	0.870689	1.20248	0.457774	0.492681	0.924868	-0.423512	1.19497	0.398072		0.691851		0.225783		-0.473296	0.335338	1.21201	1.24608	0.460313	0.00124489	1.86276	0.796093	0.399609
YDL069C	CBS1	positive regulation of mitochondrial translation; regulation of translation; mitochondrial respiratory chain complex III biogenesis	translation regulator activity	membrane; mitochondrial ribosome; extrinsic to mitochondrial inner membrane; mitochondrial inner membrane; mitochondrion	-0.30285	-0.393183	0.0880181	-0.126391	-0.0558684	-0.579164	-0.237024	0.186821	0.0719546	-0.052277	-0.236521	-0.1185	-0.0462669	-0.147089	-0.0744692	-0.267082	-0.307249	-0.0124238	-0.350853	-0.339798	-0.228268	-0.191563	-0.10209	0.117069	-0.0276186	-0.0155172	0.144936	0.103941
YDL070W	BDF2	negative regulation of heterochromatin assembly; sporulation resulting in formation of a cellular spore; DNA repair; regulation of transcription, DNA-dependent; transcription, DNA-dependent; response to DNA damage stimulus	histone binding; histone acetyl-lysine binding; TFIID-class transcription factor binding; core promoter binding	nucleus; cytoplasm	-0.00908524	0.460801	-0.389338	0.488356	0.0841826	0.259437	0.337753	0.399642	0.0722905	-0.030073	-0.0564978	0.297443	-0.122112	0.447336	0.197125	0.205775	0.219805	0.0244322	-0.0431847	-0.0752815	0.0856825	0.144875	0.307333	-0.364923	-0.614832	-0.0921027	-0.428707	-0.352843
YDL071C	YDL071C				-0.952275		0.237079	0.850845	0.252471	-0.280217	-0.193992	-0.439124	0.547666	0.361138	0.77903	0.560771	0.532348		0.824717	1.94096	1.00189		0.0699077	0.5248	2.71516	-0.204258	0.208737	1.10631	-0.221648	-0.471075	0.669582	-1.0701
YDL072C	YET3	intracellular protein transport; transport; biological_process; protein transport; vesicle-mediated transport	molecular_function	membrane; endoplasmic reticulum; integral to membrane; endoplasmic reticulum membrane	-0.338047	-0.877	0.194892	0.757607	-0.171897	-0.42551	-0.137154	0.249342	0.375232	0.100896	0.19312	0.383822	-0.211803	0.0185435	-0.101584	0.285302	0.874724	0.554105	0.892142	0.677131	0.0574754	0.206035	0.639879	0.669678	0.545579	1.1604	1.42296	1.31405
YDL073W	YDL073W	biological_process	molecular_function	cellular_component	0.00696174	0.240574	-1.45478	-1.64023	-0.543161	-0.0694167	0.0373347	0.012948	-0.00601792	0.200498	0.208285	-0.2034	-0.219251	-0.111053	-0.157811	-0.367217	-0.0850267	-0.210835	-0.0226766	-0.486557	-0.150138	-0.115165	-0.326838	-0.264583	-0.403925	0.0747742	-0.440015	-0.531965
YDL074C	BRE1	mitotic G1 DNA damage checkpoint; histone monoubiquitination; intra-S DNA damage checkpoint; meiotic DNA double-strand break formation; protein ubiquitination; double-strand break repair via homologous recombination; chromatin silencing at telomere; chromatin modification; transcription from RNA polymerase II promoter	metal ion binding; zinc ion binding; ubiquitin-protein ligase activity; ligase activity	nucleus; nuclear chromatin	-0.0152725	0.523869	-1.08976	-1.14285	-0.0137672	0.332683	0.310928	0.128208	0.241715	0.0475717	0.186954	-0.187215	0.266661	0.100777	-0.129571	-0.14587	0.0874284	-0.054588	0.0393243	-0.167879	0.291437	0.191628	-0.0416943	0.00565971	0.100354	-0.17319	-0.34977	-0.369098
YDL075W	RPL31A	cytoplasmic translation; translation; regulation of translational fidelity	structural constituent of ribosome	ribosome; ribonucleoprotein complex; cytosolic large ribosomal subunit; intracellular; cytoplasm	0.243279	0.0270921	-0.691984	-1.4354	0.184733	-0.120861	-0.0456788	-0.246984	-0.137317	0.0822914	-0.00192319	-0.0415764	-0.0590848	-0.0129962	-0.0151181	-0.115767	0.0849984	-0.115292	0.0400595	-0.433986	0.531058	0.329516	0.0801266	0.823735	0.604191	0.533722	0.438423	0.108804
YDL076C	RXT3	regulation of transcription, DNA-dependent; transcription, DNA-dependent; negative regulation of transcription from RNA polymerase I promoter; chromatin modification	molecular_function	nucleus; Rpd3L complex; Rpd3L-Expanded complex	0.0441447	-0.254956	0.475101	0.527579	0.382746	0.129756	0.0980545	0.21688	0.17788	0.114426	0.0964727	0.180005	0.150597	0.0987334	0.0903156	0.206373	0.285018	0.151623	0.256872	0.0639828	-0.111723	-0.0377903	0.215541	0.357902	0.45819	0.574054	0.526098	0.563823
YDL077C	VAM6	transport; vacuole fusion, non-autophagic; piecemeal microautophagy of nucleus; vesicle-mediated transport; vacuole organization; regulation of SNARE complex assembly; protein transport; regulation of vacuole fusion, non-autophagic	Rab guanyl-nucleotide exchange factor activity; phosphatidylinositol binding	membrane; vacuolar membrane; fungal-type vacuole membrane; fungal-type vacuole; HOPS complex; vacuole	0.283762	0.622313	-0.193142	0.46898	0.258028	0.40558	0.0625481	0.233032	-0.182034	0.129978	0.0451383	0.145825	0.263498	-0.315571	0.0216782	0.112361	-0.457445	-0.246328	0.0809919	0.00619649	0.0952258	-0.048287	0.13	0.260084	0.00555816	-0.254182	-0.287925	0.16682
YDL078C	MDH3	tricarboxylic acid cycle; fatty acid beta-oxidation; glyoxylate cycle; NADH regeneration; carbohydrate metabolic process; cellular carbohydrate metabolic process; oxidation-reduction process; malate metabolic process	mRNA binding; oxidoreductase activity, acting on the CH-OH group of donors, NAD or NADP as acceptor; malate dehydrogenase activity; catalytic activity; L-malate dehydrogenase activity; oxidoreductase activity	peroxisomal matrix; peroxisome	0.0372752	-0.494596	0.947566	1.1885	0.297918	-0.395897	-0.258499	-0.0464758	-0.361433	-0.083184	-0.207087	0.0957777	-0.0557871	-0.0489516	-0.110858	-0.0649955	-0.493823	-0.0713846	-0.0143765	-0.0964953	-0.0714325	-0.0392323	0.00853194	0.067419	0.0886034	0.394259	0.466076	0.286917
YDL079C	MRK1	phosphorylation; regulation of protein catabolic process; response to stress; protein phosphorylation	protein serine/threonine kinase activity; ATP binding; protein kinase activity; kinase activity; nucleotide binding; transferase activity; transferase activity, transferring phosphorus-containing groups	cellular_component	0.149884	-2.73585	3.55789	3.97521	-0.329938	-1.33121	-0.5831	-0.0260912	0.458695	-0.342012	1.1219	0.335847	-0.454214	-0.0946378	-0.5843	-0.59343	-0.378556	1.5368	1.71783	2.46374	0.303905	-1.48825	-0.595729	0.687209	1.19462	1.45321	2.3213	2.47815
YDL080C	THI3	branched-chain amino acid catabolic process; amino acid catabolic process via Ehrlich pathway; positive regulation of transcription from RNA polymerase II promoter; positive regulation of thiamine biosynthetic process	magnesium ion binding; carboxy-lyase activity; metal ion binding; lyase activity; catalytic activity; thiamine pyrophosphate binding; RNA polymerase II activating transcription factor binding	nucleus	-0.281752	-0.136769	-0.51479	-0.423288	-0.304767	-0.0858896	-0.241499	-0.14104	-0.0447257	-0.225194	-0.0408649	-0.153504	0.285202	-0.279442	-0.240078	-0.143905	-0.438501	-0.659406	-0.650425	0.0300743	0.165433	-0.374183	-0.639613	-0.695217	-0.810424	-0.763637	-0.753161	-0.296681
YDL081C	RPP1A	cytoplasmic translation; translational elongation	structural constituent of ribosome	ribosome; ribonucleoprotein complex; cytosolic large ribosomal subunit; intracellular; cytoplasm	-0.143422	0.361992	-0.761215	-1.30264	0.135193	-0.590296	-0.422882	-0.516326	-0.961113	-0.268121	-0.635727	-0.640245	-0.135841	-0.199686	-0.146775	-0.914843	0.302247	-0.274747	0.088401	-0.711792	0.986035	0.729902	0.83558	1.2987	0.806544	0.89378	1.13255	0.522895
YDL082W	RPL13A	cytoplasmic translation; translation	structural constituent of ribosome	ribosome; ribonucleoprotein complex; cytosolic large ribosomal subunit; intracellular; cytoplasm	0.260366	-0.0969221	-0.327078	-0.950297	0.515575	0.394625	0.383707	0.482726	0.524546	0.396614	0.355381	0.361351	0.36469	0.372335	0.131084	-0.00741426	0.123798	0.0235556	-0.0633644	-0.478595	0.252957	0.336414	-0.0507852	0.211862	0.119346	-0.0803858	-0.39476	-0.285299
YDL083C	RPS16B	maturation of SSU-rRNA from tricistronic rRNA transcript (SSU-rRNA, 5.8S rRNA, LSU-rRNA); translation; cytoplasmic translation	structural constituent of ribosome	ribosome; ribonucleoprotein complex; cytosolic small ribosomal subunit; cytoplasm	0.252903	0.536444	-1.22014	-1.92567	0.236368	0.0232984	0.0224891	-0.0126181	0.157968	0.18525	0.130241	0.120001	0.0463911	0.0956809	0.0490456	0.0778361	0.340786	0.0765948	0.0701997	-0.221725	0.190418	0.0494354	-0.000508302	0.286359	0.0199249	0.215375	0.198926	-0.150463
YDL084W	SUB2	mRNA processing; transport; mRNA export from nucleus; mRNA splicing, via spliceosome; transcription-coupled nucleotide-excision repair; mRNA 3'-end processing; chromatin silencing at telomere; mRNA transport; transcription elongation from RNA polymerase II promoter; RNA splicing	RNA binding; ATP binding; helicase activity; nucleic acid binding; ATP-dependent helicase activity; ATP-dependent RNA helicase activity; hydrolase activity; nucleotide binding	nucleus; chromosome, telomeric region; spliceosomal complex; cytoplasm; transcription export complex	0.149307	-0.251157	0.0408622	-0.459209	0.40664	0.220342	0.371732	0.395701	0.19773	0.370717	0.340871	0.247236	0.299618	0.250362	0.216308	0.287824	-0.118077	0.066841	0.00334739	-0.120373	0.62739	0.385354	0.26685	0.512283	0.532281	0.313379	0.231465	0.249208
YDL085C-A	YDL085C-A	biological_process	molecular_function	nucleus; cytoplasm	0.157673	0.46498	-0.450445	-0.587972	0.128395	-0.301168	-0.49336	-0.286256	-0.793031	-0.542026	-0.774645	-0.415681	0.189386	0.00684212	-0.215999	-0.148441	0.249599	-0.340135	-0.207567	-0.230585	0.459428	0.459802	0.898458	0.123133	-0.19516	1.19901	0.930082	0.439054
YDL086W	YDL086W	biological_process	carboxymethylenebutenolidase activity; hydrolase activity	mitochondrion; cytoplasm	0.156728	-0.116818	0.432387	0.369874	0.141594	-0.235408	-0.119303	0.0743335	0.120019	0.13687	0.101664	0.149941	0.017778	0.0398973	0.056096	0.232684	0.0679707	0.0082539	0.13444	0.279806	-0.11458	-0.398368	-0.493431	-0.026352	-0.0171966	0.00165865	-0.0734563	0.085593
YDL087C	LUC7	mRNA processing; mRNA splice site selection; RNA splicing	mRNA binding	U1 snRNP; nucleus; U2-type prespliceosome; spliceosomal complex; cytosol; ribonucleoprotein complex	-0.0631848	0.113636	0.508427	0.309389	-0.0310741	-0.0199639	0.392826	-0.0422468	-0.0605816	0.286601	-0.224829	0.0370134	-0.101342	0.122744	0.45299	0.447599	0.0977343	0.185549	-0.0510343	-0.156543	-0.0100701	-0.303421	-0.315526	-0.509969	0.0475916	-0.0816723	-0.420967	-0.590145
[truncated: 4,961 more rows]
